# Supplementary material for: Halogen-bonding-mediated synthesis of amides and peptides
Source: Royal Society of Chemistry journal article supplement (doi:10.1039/d3gc03102k), 2023-01-01
Supplement: d3gc03102k1.pdf [file d3gc03102k1.pdf]

## Electronic Supplementary Information

for

# Halogen-Bonding-Mediated Synthesis of Amides and Peptides

Mingqin Huang<sup>1</sup>, Jun-Jie Li<sup>1</sup>, Chi Zhang<sup>1\*</sup>

<sup>1</sup>State Key Laboratory of Elemento-Organic Chemistry, The Research Institute of Elemento-Organic Chemistry, College of Chemistry, Nankai University, Tianjin 300071, China

\*Correspondence to: [zhangchi@nankai.edu.cn](mailto:zhangchi@nankai.edu.cn)

### Table of Contents

|                                                              |    |
|--------------------------------------------------------------|----|
| 1 General information.....                                   | 2  |
| 2 The Preparation of carbene precursors .....                | 3  |
| 3 General Procedure for preparation of amides.....           | 5  |
| 3.1. Characterization of the obtained amides.....            | 5  |
| 4 General Procedure for the preparation of dipeptides .....  | 7  |
| 4.1 Characterization of the obtained dipeptides .....        | 8  |
| 5 General Procedure for the preparation of tripeptides ..... | 14 |
| 5.1. Characterization of the obtained tripeptides .....      | 14 |
| 6 Synthetic applications.....                                | 16 |
| 6.1 The Synthesis of Protected Leu-enkephalin .....          | 16 |
| 7 The gram-scale synthesis of 7ab.....                       | 19 |
| 8 Experimental mechanism studies .....                       | 19 |
| 8.1 Synthesis of intermediate XB-I .....                     | 19 |

|                                                                          |     |
|--------------------------------------------------------------------------|-----|
| 8.2 <sup>13</sup> C NMR analysis .....                                   | 20  |
| 8.3 Detection of I <sub>2</sub> .....                                    | 20  |
| 8.4 Synthesis of intermediate IM5a .....                                 | 21  |
| 8.5 Screening of base equivalents.....                                   | 21  |
| 8.6 Synthesis of 4aa by intermediate IM5a .....                          | 22  |
| 9 Optimization of the reaction conditions .....                          | 23  |
| 10 General Procedure for the preparation of dipeptides .....             | 24  |
| 11 Computational details of the mechanism.....                           | 24  |
| 11.1 NIS-3a-DABCO system .....                                           | 25  |
| 11.2 K <sub>2</sub> S <sub>2</sub> O <sub>8</sub> -3a-DABCO system ..... | 44  |
| 12 <sup>1</sup> H NMR, <sup>13</sup> C NMR, and HPLC Spectrums .....     | 61  |
| 13 References.....                                                       | 157 |

## 1 General information

The <sup>1</sup>H NMR spectra were recorded at 400 MHz and <sup>13</sup>C NMR spectra were measured at 100 MHz using a Bruker AV 400 instrument with CDCl<sub>3</sub> and DMSO-*d*<sub>6</sub> as the solvent. <sup>1</sup>H NMR chemical shifts (δ) were determined relative to internal standard TMS (δ=0.0 ppm) and the solvents (DMSO-*d*<sub>6</sub>, <sup>1</sup>H: δ = 2.50 ppm); <sup>13</sup>C NMR chemical shifts (δ) were measured with the solvents as references (For CDCl<sub>3</sub>, <sup>13</sup>C: δ = 77.00 ppm; for DMSO-*d*<sub>6</sub>, <sup>13</sup>C: δ = 39.53 ppm). The multiplicities of the signals are described using the following abbreviations: s = singlet, d = doublet, t = triplet, q = quartet, m = multiple, br = broad and coupling constants (J) were in Hertz (Hz). IR spectra were recorded on a FT-IR Bruker EQUINOX55 spectrometer in KBr pellets. Mass spectra were acquired on Agilent 6520 Q-TOF LC/MS and Varian 7.0T FTMS. Reactions were monitored by thin layer chromatography (TLC) carried out on Huanghai HSGF254 plates. Preparative TLC was performed on Xincheng GF254 preparative TLC plates. Silica gel (200-300 mesh) was purchased from Anhui Liangchen Co.; China. Unless otherwise noted, all reactions were performed under Argon protection. High performance liquid chromatography (HPLC) analysis was conducted using Shimadzu LC-10 AD coupled diode array-detector SPD-MA-10A-VP and chiral column of Daicel CHIRALCEL OD-H (4.6 mm-25 cm), AD-H (4.6 mm-25 cm), or AS-H (4.6 mm-25 cm). Melting points were recorded on a RY-1 type apparatus. All solvents were obtained from commercial sources and were purified according to standard procedures.

**Materials:** All solvents were purified according to the purification handbook *Purification of Laboratory Chemicals* before using. Other reagents and starting materials were synthesized or purchased from commercial sources and used as received.

## 2 The Preparation of carbene precursors

Carbene precursor **3a** is commercially available.

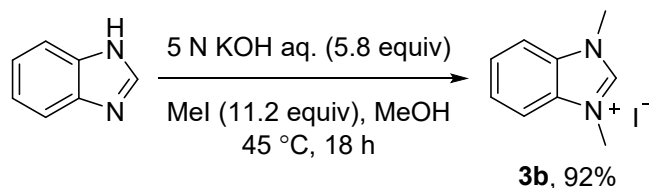

**1,3-dimethyl-1H-benzo[d]imidazol-3-ium iodide (3b):** The carbene precursor was performed according to the reported procedures<sup>1</sup>. Benzimidazole (2 g, 16.93 mmol) was dissolved in 20 ml 5 N KOH solution and 10 ml MeOH, and MeI (26.91 g, 189.62 mmol) was added dropwise. The temperature was maintained at 45 °C for 18 hours, and then returned to room temperature and left overnight to filter the white crystals (4.26 g, 92% yield). <sup>1</sup>H NMR (400 MHz, DMSO-*d*<sub>6</sub>) δ 9.67 (s, 1H), 8.04 – 7.99 (m, 2H), 7.71 – 7.67 (m, 2H), 4.08 (s, 6H). <sup>13</sup>C NMR (100 MHz, DMSO-*d*<sub>6</sub>) δ 143.09, 131.64, 126.43, 113.43, 33.32.

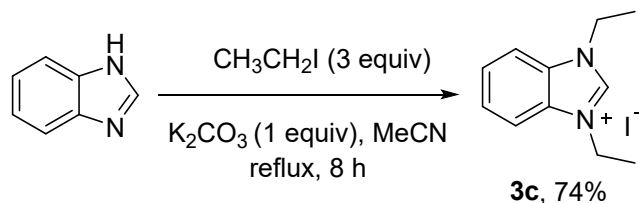

**1,3-diethyl-1H-benzo[d]imidazol-3-ium iodide (3c):** The carbene precursor was performed according to the reported procedures<sup>2</sup>. Benzimidazole (1.0 g, 8.46 mmol), CH<sub>3</sub>CH<sub>2</sub>I (3.96 g, 25.39 mmol) and K<sub>2</sub>CO<sub>3</sub> (1.17 g, 8.46 mmol) were heated under reflux conditions in acetonitrile for 8 h. The solvent of the resulting suspension was removed under reduced pressure, and the residue was resuspended in dichloromethane and filtered to remove the formed potassium iodide. The filtrate was evaporated under reduced pressure, the residue was resuspended in tetrahydrofuran and filtered to give the pure product (1.88 g, 74% yield). <sup>1</sup>H NMR (400 MHz, DMSO-*d*<sub>6</sub>) δ 9.88 (s, 1H), 8.17 – 8.04 (m, 2H), 7.77 – 7.63 (m, 2H), 4.53 (q, *J* = 7.3 Hz, 4H), 1.55 (t, *J* = 7.3 Hz, 6H). <sup>13</sup>C NMR (100 MHz, DMSO-*d*<sub>6</sub>) δ 141.60, 130.94, 126.44, 113.65, 99.51, 42.06, 14.18.

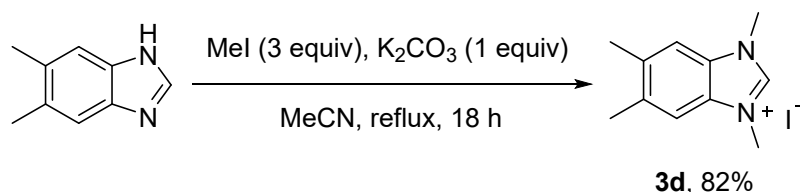

**1,3,5,6-tetramethyl-1H-benzo[d]imidazol-3-ium iodide (3d):** The carbene precursor was performed according to the reported procedures<sup>2-3</sup>. 5,6-dimethylbenzimidazole (2.0 g, 13.68 mmol) and K<sub>2</sub>CO<sub>3</sub> (1.89 g, 13.68 mmol) were dissolved in MeCN and MeI (5.83 g, 41.04 mmol) was added dropwise and the reaction mixture was heated under reflux conditions in acetonitrile for 18 h. The solvent of the resulting suspension was removed under reduced pressure, and the residue was resuspended in dichloromethane and filtered to remove the formed potassium iodide. The filtrate was evaporated under reduced pressure, the residue was resuspended in ethyl acetate and filtered to give the pure product (3.39 g, 82% yield). <sup>1</sup>H NMR (400 MHz, DMSO-*d*<sub>6</sub>) δ 9.51 (s, 1H), 7.80 (s, 2H), 4.02 (s, 6H), 2.42 (s, 6H). <sup>13</sup>C NMR (100 MHz, DMSO-*d*<sub>6</sub>) δ 141.77, 136.02, 130.09, 112.90, 33.11, 19.95.

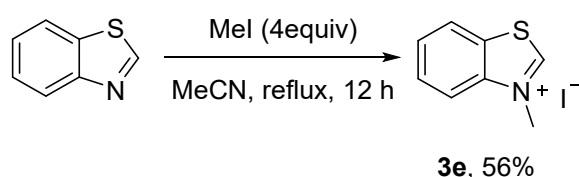

**3-methylbenzo[d]thiazol-3-ium iodide (3e):** The carbene precursor was performed according to the reported procedures<sup>4</sup>. Benzothiazole (2.0 g, 14.79 mmol) and MeI (8.4 g, 59.18 mmol) were heated under reflux conditions in acetonitrile for 12 h and then cooled to room temperature and the precipitated solid was filtered, which was washed with ethyl acetate to give pure product (2.24, 56% yield). <sup>1</sup>H NMR (400 MHz, DMSO-*d*<sub>6</sub>) δ 10.55 (s, 1H), 8.53 (d, *J* = 8.1 Hz, 1H), 8.32 (d, *J* = 8.4 Hz, 1H), 7.95 (dd, *J* = 11.4, 4.1 Hz, 1H), 7.86 (t, *J* = 7.6 Hz, 1H), 4.41 (s, 3H). <sup>13</sup>C NMR (100 MHz, DMSO-*d*<sub>6</sub>) δ 164.86, 141.01, 131.09, 129.43, 128.31, 125.02, 117.13.

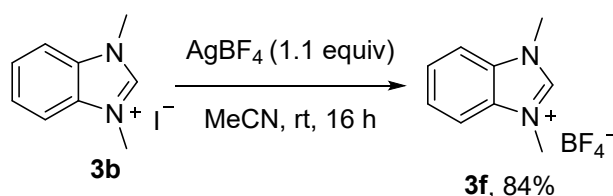

**1,3-dimethylbenzimidazolium tetrafluoroborate (3f):** The carbene precursor was performed according to the reported procedures<sup>5</sup>. **3b** (500 mg, 1.82 mmol) was dissolved in acetonitrile (15 mL). A solution of AgBF<sub>4</sub> (391mg, 2.0 mmol) in acetonitrile (5 mL) was then added dropwise leading to the precipitation of silver iodide. The suspension was stirred for 16 hours in absence of light and the precipitate was eliminated by filtration. The filtrate was removed under reduced pressure, and the white residue was dissolved in dichloromethane and then filtered to remove insoluble impurities. The filtrate was removed under reduced pressure, and the white residue was dissolved in dichloromethane and then *n*-pentane was added. After filtration and several washings with *n*-pentane to give pure product (1.430 g, 84% yield). <sup>1</sup>H NMR (400 MHz, DMSO-*d*<sub>6</sub>) δ 9.59 (s, 1H), 8.00 (dd, *J* = 6.1, 3.1 Hz, 2H), 7.70 (dd, *J* = 6.2, 3.0 Hz, 2H), 4.08 (s, 6H). <sup>13</sup>C NMR (100 MHz, DMSO-*d*<sub>6</sub>) δ 143.15, 131.69, 126.45, 113.38, 33.10.

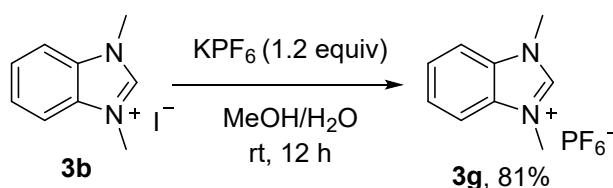



**1,3-dimethyl-benzimidazolium hexafluorophosphate (3g):** The carbene precursor was performed according to the reported procedures<sup>6</sup>. **3b** (500 mg, 1.82 mmol) was dissolved in MeOH (10 mL), a solution of KPF<sub>6</sub> (403 mg, 2.19 mmol) in MeOH (1 ml) and H<sub>2</sub>O (6 mL) was then added dropwise and the whole mixture was stirred at room temperature for overnight. The white precipitated solid was washed with methanol and then dried in air to afford product (430 mg, 81% yield). <sup>1</sup>H NMR (400 MHz, DMSO-*d*<sub>6</sub>) δ 9.60 (d, *J* = 14.2 Hz, 1H), 8.18 – 7.90 (m, 2H), 7.86 – 7.57 (m, 2H), 4.06 (d, *J* = 14.4 Hz, 6H). <sup>13</sup>C NMR (100 MHz, DMSO-*d*<sub>6</sub>) δ 143.17, 131.70, 126.45, 113.38, 33.10.

### 3 General Procedure for preparation of amides

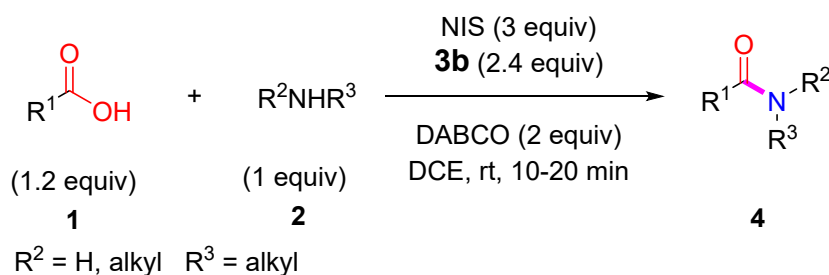

Carboxylic acid **1** (0.12 mmol), amine **2** (0.1 mmol) and DABCO (22.4 mg, 0.2 mmol) were placed in a 10 ml two-neck round bottom flask, and DCE (3 ml) was added in argon atmosphere. After 5 min, NIS (67.5 mg, 0.3 mmol) and **3b** (65.8 mg, 0.24 mmol) were added in sequence at rt. The resulting mixture was stirred at room temperature and monitored by TLC. After amine was fully consumed, the reaction was quenched with 5% sodium thiosulfate solution (5 mL) and extracted with DCM (6 mL x 3). The combined organic layer was washed with brine, dried over anhydrous MgSO<sub>4</sub>, and concentrated in vacuo to afford the crude product, which was then purified by silica gel flash chromatography to give the pure amide product **4**.

#### 3.1. Characterization of the obtained amides

##### *N*-benzylbenzamide (**4aa**)<sup>7</sup>

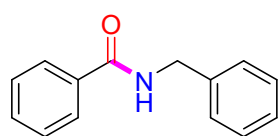

127.59, 126.93, 44.10.

White solid, 99% yield (22.4 mg). <sup>1</sup>H NMR (400 MHz, CDCl<sub>3</sub>) δ 7.83 – 7.73 (m, 2H), 7.52 – 7.46 (m, 1H), 7.44 – 7.39 (m, 2H), 7.38 – 7.25 (m, 5H), 6.49 (br s, 1H), 4.64 (d, *J* = 5.7 Hz, 2H). <sup>13</sup>C NMR (100 MHz, CDCl<sub>3</sub>) δ 167.32, 138.17, 134.37, 131.51, 128.76, 128.56, 127.89,

##### *N*-hexylbenzamide (**4ab**)<sup>8</sup>

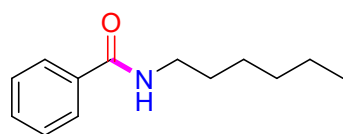

δ 167.50, 134.86, 131.25, 128.50, 126.80, 40.09, 31.48, 29.61, 26.64, 22.53, 13.98.

White solid, 96% yield (21.1 mg). <sup>1</sup>H NMR (400 MHz, CDCl<sub>3</sub>) δ 7.76 (d, *J* = 7.2 Hz, 2H), 7.50 – 7.40 (m, 3H), 6.21 (br s, 1H), 3.44 (dd, *J* = 13.2, 7.0 Hz, 2H), 1.60 (dd, *J* = 14.6, 7.4 Hz, 2H), 1.42 – 1.28 (m, 6H), 0.89 (t, *J* = 6.6 Hz, 3H). <sup>13</sup>C NMR (100 MHz, CDCl<sub>3</sub>)

***N*-benzyl-4-methoxybenzamide (4ba)**<sup>7</sup>

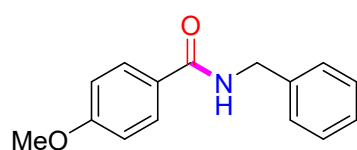

White solid, 88% yield (21.2 mg). <sup>1</sup>H NMR (400 MHz, CDCl<sub>3</sub>) δ 7.81 – 7.68 (m, 2H), 7.39 – 7.26 (m, 5H), 6.94 – 6.84 (m, 2H), 6.45 (br s, 1H), 4.62 (d, *J* = 5.7 Hz, 2H), 3.83 (s, 3H). <sup>13</sup>C NMR (100 MHz, CDCl<sub>3</sub>) δ 166.84, 162.16, 138.38, 128.74, 128.70, 127.86, 127.49, 126.58, 113.70, 55.36, 44.01.

***N*-benzyl-4-iodobenzamide (4ca)**<sup>7</sup>

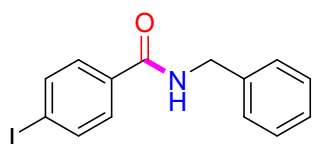

White solid, 90% yield (30.6 mg). <sup>1</sup>H NMR (400 MHz, CDCl<sub>3</sub>) δ 7.77 (d, *J* = 6.2 Hz, 2H), 7.50 (d, *J* = 6.3 Hz, 2H), 7.39 – 7.26 (m, 5H), 6.45 (br s, 1H), 4.68 – 4.52 (m, 2H). <sup>13</sup>C NMR (100 MHz, CDCl<sub>3</sub>) δ 166.52, 137.88, 137.77, 133.73, 128.82, 128.55, 127.92, 127.72, 98.48, 44.19.

**4-chloro-*N*-(2-morpholinoethyl)benzamide (4dc)**<sup>7</sup>

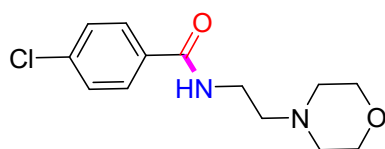

White solid, 99% yield (26.5 mg). <sup>1</sup>H NMR (400 MHz, CDCl<sub>3</sub>) δ 7.76 – 7.67 (m, 2H), 7.42 (d, *J* = 8.4 Hz, 2H), 6.79 (br s, 1H), 3.79 – 3.66 (m, 4H), 3.55 (dd, *J* = 11.2, 5.6 Hz, 2H), 2.61 (t, *J* = 6.0 Hz, 2H), 2.55 – 2.46 (m, 4H). <sup>13</sup>C NMR (100 MHz, CDCl<sub>3</sub>) δ 166.27, 137.59, 132.91, 128.78, 128.31, 66.93, 56.75, 53.27, 36.02.

***N,N*-dipropylbenzamide (4ad)**<sup>9</sup>

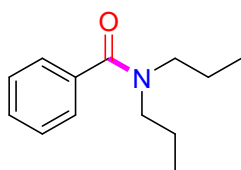

Colorless oil, 99% yield (20.3 mg). <sup>1</sup>H NMR (400 MHz, CDCl<sub>3</sub>) δ 7.43 – 7.31 (m, 5H), 3.46 (s, 2H), 3.16 (s, 2H), 1.69 (d, *J* = 5.8 Hz, 2H), 1.52 (d, *J* = 5.6 Hz, 2H), 0.98 (s, 3H), 0.74 (s, 3H). <sup>13</sup>C NMR (100 MHz, CDCl<sub>3</sub>) δ 171.73, 137.38, 128.93, 128.30, 126.40, 77.32, 77.00, 76.68, 50.63, 46.22, 21.86, 20.67, 11.38, 10.97.

**phenyl(pyrrolidin-1-yl)methanone (4ae)**<sup>10</sup>

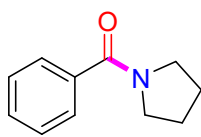

White solid, 94% yield (16.4 mg). <sup>1</sup>H NMR (400 MHz, CDCl<sub>3</sub>) δ 7.53 – 7.50 (m, 2H), 7.44 – 7.34 (m, 3H), 3.65 (t, *J* = 6.9 Hz, 2H), 3.43 (t, *J* = 6.5 Hz, 2H), 1.97 (dt, *J* = 13.2, 6.6 Hz, 2H), 1.87 (dt, *J* = 13.2, 6.4 Hz, 2H). <sup>13</sup>C NMR (100 MHz, CDCl<sub>3</sub>) δ 169.72, 137.23, 129.73, 128.21, 127.05, 77.32, 77.00, 76.68, 49.57, 46.13, 26.36, 24.44.

**phenyl(piperidin-1-yl)methanone (4af)**<sup>10</sup>

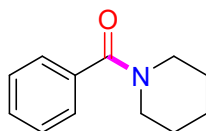

White solid, 99% yield (19.8 mg). <sup>1</sup>H NMR (400 MHz, CDCl<sub>3</sub>) δ 7.39 (s, 5H), 3.71 (s, 2H), 3.34 (s, 2H), 1.67 (s, 4H), 1.52 (s, 2H). <sup>13</sup>C NMR (100 MHz, CDCl<sub>3</sub>) δ 170.26, 136.49, 129.28, 128.34, 126.74, 77.32, 48.71, 43.08, 26.48, 25.59, 24.56.

***N*-benzyl-3-phenylpropanamide (4ea)**<sup>11</sup>

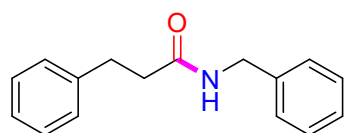

White solid, 99% yield (23.7 mg).  $^1\text{H}$  NMR (400 MHz,  $\text{CDCl}_3$ )  $\delta$  7.30 – 7.25 (m, 5H), 7.20 (t,  $J = 7.7$  Hz, 3H), 7.13 (d,  $J = 6.7$  Hz, 2H), 5.72 (br s, 1H), 4.38 (d,  $J = 5.6$  Hz, 2H), 2.98 (t,  $J = 7.6$  Hz, 2H), 2.50 (t,  $J = 7.6$  Hz, 2H).  $^{13}\text{C}$  NMR (100 MHz,  $\text{CDCl}_3$ )  $\delta$  171.84, 140.72, 138.10, 128.60, 128.51, 128.36, 127.68, 127.40, 126.21, 43.51, 38.44, 31.67.

#### *N*-benzylhexanamide (4fa)<sup>7</sup>

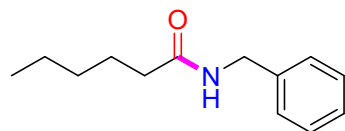

White solid, 99% yield (20.4 mg).  $^1\text{H}$  NMR (400 MHz,  $\text{CDCl}_3$ )  $\delta$  7.37 – 7.22 (m, 5H), 5.81 (br s, 1H), 4.43 (d,  $J = 5.6$  Hz, 2H), 2.20 (t,  $J = 7.6$  Hz, 2H), 1.74 – 1.51 (m, 2H), 1.29 (t,  $J = 11.9$  Hz, 4H), 0.89 (t,  $J = 6.5$  Hz, 3H).  $^{13}\text{C}$  NMR (100 MHz,  $\text{CDCl}_3$ )  $\delta$  172.96, 138.42, 128.65, 127.78, 127.44, 43.53, 36.73, 31.45, 25.42, 22.36, 13.90.

#### (3*r*,5*r*,7*r*)-*N*-benzyladamantane-1-carboxamide (4ga)<sup>12</sup>

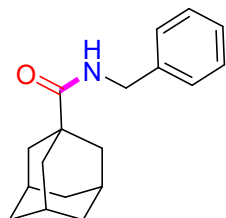

White solid, 98% yield (27.1 mg).  $^1\text{H}$  NMR (400 MHz,  $\text{CDCl}_3$ )  $\delta$  7.35 – 7.24 (m, 5H), 5.90 (br s, 1H), 4.43 (d,  $J = 5.5$  Hz, 2H), 2.04 (s, 3H), 1.89 (s, 6H), 1.72 (dd,  $J = 20.7$  Hz,  $J = 12.4$  Hz, 6H).  $^{13}\text{C}$  NMR (100 MHz,  $\text{CDCl}_3$ )  $\delta$  177.75, 138.65, 128.64, 127.59, 127.33, 43.27, 40.60, 39.26, 36.46, 28.08.

## 4 General Procedure for the preparation of

### dipeptides

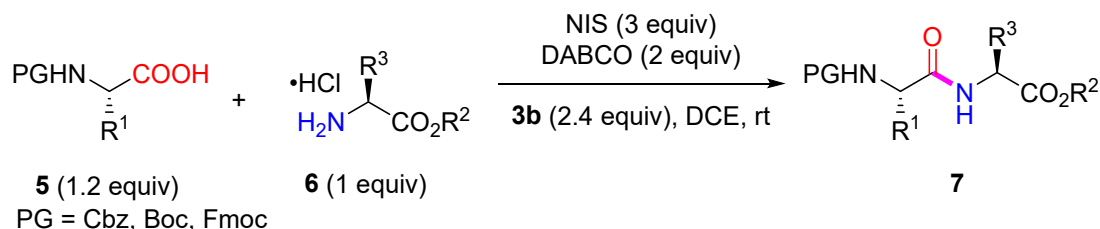

Amino acids **5** (0.12 mmol), amino acids **6** (0.1 mmol) and DABCO (22.4 mg, 0.2 mmol) were placed in a 10 ml two-neck round bottom flask, and DCE (3 ml) was added in argon atmosphere. After 5 min, NIS (67.5 mg, 0.3 mmol) and **3b** (65.8 mg, 0.24 mmol) were added in sequence at rt. The resulting mixture was stirred at room temperature and monitored by TLC. After amine was fully consumed, the reaction was quenched with 5% sodium thiosulfate solution (5 mL) and extracted with DCM (6 mL x 3). The combined organic layer was washed with brine, dried over anhydrous  $\text{MgSO}_4$ , and concentrated in vacuo to afford the crude product, which was then purified by silica gel flash chromatography to give the desired product **7**.

### 4.1 Characterization of the obtained dipeptides

#### Cbz-L-Phe-L-Leu-OMe (7aa)<sup>13</sup>

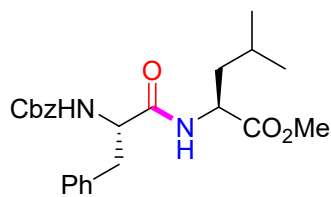

White solid, 95% yield (40.6 mg).  $^1\text{H}$  NMR (400 MHz,  $\text{CDCl}_3$ )  $\delta$  7.37 – 7.27 (m, 5H), 7.26 – 7.21 (m, 3H), 7.20 – 7.13 (m, 2H), 6.41 (br s, 1H), 5.45 (d,  $J = 6.7$  Hz, 1H), 5.07 (s, 2H), 4.60 – 4.42 (m, 2H), 3.68 (s, 3H), 3.07 (d,  $J = 6.7$  Hz, 2H), 1.62 – 1.41 (m, 3H), 0.87 (t,  $J = 6.0$  Hz, 6H).  $^{13}\text{C}$  NMR (100 MHz,  $\text{CDCl}_3$ )  $\delta$  172.77, 170.61, 155.88, 136.22, 136.06, 129.32, 128.55, 128.46, 128.12, 127.93, 126.92, 66.97, 55.92, 52.20, 50.72, 41.33, 38.32, 24.62, 22.61, 21.83.

#### Boc-L-Phe-L-Leu-OMe (7ba)<sup>14</sup>

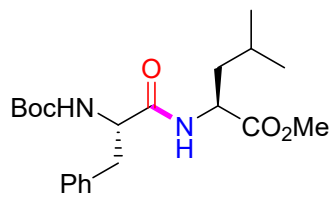

White solid, 83% yield (32.4 mg).  $^1\text{H}$  NMR (400 MHz,  $\text{CDCl}_3$ )  $\delta$  7.32 – 7.26 (m, 2H), 7.25 – 7.19 (m, 3H), 6.30 (d,  $J = 8.1$  Hz, 1H), 5.03 (br s, 1H), 4.56 (dd,  $J = 8.2, 5.0$  Hz, 1H), 4.36 (d,  $J = 6.1$  Hz, 1H), 3.69 (s, 3H), 3.07 (d,  $J = 6.8$  Hz, 2H), 1.63 – 1.45 (m, 3H), 1.41 (s, 9H), 0.90 (t,  $J = 7.4$  Hz, 6H).  $^{13}\text{C}$  NMR (100 MHz,  $\text{CDCl}_3$ )  $\delta$  172.78, 170.90, 155.35, 136.54, 129.34, 128.58, 126.87, 80.16, 55.61, 52.20, 50.68, 41.53, 38.01, 28.19, 24.60, 22.70, 21.83.

#### Fmoc-L-Phe-L-Leu-OMe (7ca)<sup>15</sup>

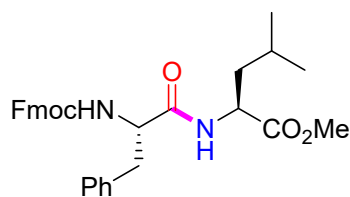

White solid, 81% yield (41.6 mg).  $^1\text{H}$  NMR (400 MHz,  $\text{CDCl}_3$ )  $\delta$  7.76 (d,  $J = 7.5$  Hz, 2H), 7.60 – 7.47 (m, 2H), 7.40 (t,  $J = 7.4$  Hz, 2H), 7.33 – 7.26 (m, 4H), 7.25 – 7.14 (m, 3H), 6.17 (s, 1H), 5.38 (d,  $J = 7.0$  Hz, 1H), 4.55 (td,  $J = 8.5, 5.3$  Hz, 1H), 4.44 (dd,  $J = 10.5, 7.1$  Hz, 2H), 4.37 – 4.25 (m, 1H), 4.19 (t,  $J = 6.9$  Hz, 1H), 3.69 (s, 3H), 3.08 (dd,  $J = 23.4, 5.8$  Hz, 2H), 1.64 – 1.37 (m, 3H), 0.87 (dd,  $J = 9.6, 6.2$  Hz, 6H).  $^{13}\text{C}$  NMR (100 MHz,  $\text{CDCl}_3$ )  $\delta$  172.70, 170.44, 155.93, 143.73, 143.64, 141.27, 136.20, 129.38, 128.66, 127.72, 127.06, 125.06, 124.98, 119.97, 67.09, 55.97, 52.26, 50.80, 47.07, 41.47, 38.39, 24.67, 22.64, 21.87.

#### Cbz-L-Phe-L-Gly-OMe (7ab)<sup>13</sup>

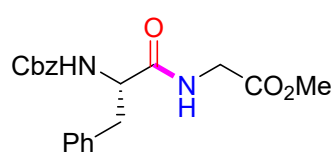

White solid, 98% yield (36.3 mg).  $^1\text{H}$  NMR (400 MHz,  $\text{CDCl}_3$ )  $\delta$  7.39 – 7.21 (m, 8H), 7.20 – 7.13 (m, 2H), 6.66 (br s, 1H), 5.57 (s, 1H), 5.04 (q,  $J = 12.3$  Hz, 2H), 4.52 (d,  $J = 5.7$  Hz, 1H), 4.05 – 3.81 (m, 2H), 3.69 (s, 3H), 3.20 – 2.95 (m, 2H).  $^{13}\text{C}$  NMR (100 MHz,  $\text{CDCl}_3$ )  $\delta$  171.33, 169.86, 155.99, 136.29, 136.02, 129.21, 128.56, 128.44, 128.09, 127.89, 126.92, 66.97, 55.92, 52.28, 41.06, 38.33.

#### Cbz-L-Phe-L-Ala-OMe (7ac)<sup>16</sup>

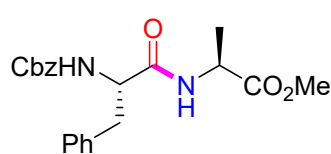

White solid, 85% yield (32.7 mg).  $^1\text{H}$  NMR (400 MHz,  $\text{CDCl}_3$ )  $\delta$  7.38 – 7.25 (m, 8H), 7.24 – 7.14 (m, 2H), 6.37 (br s, 1H), 5.36 (d,  $J = 6.4$  Hz, 1H), 5.08 (s, 2H), 4.57 – 4.36 (m, 2H), 3.71 (s, 3H), 3.15 – 3.00 (m, 2H), 1.32 (d,  $J = 7.1$  Hz, 3H).  $^{13}\text{C}$  NMR (100 MHz,  $\text{CDCl}_3$ )  $\delta$  172.76, 170.30, 155.85, 136.15, 129.32, 128.65, 128.53, 128.50, 128.48, 128.17, 128.01, 127.04, 67.04, 55.97, 52.44, 48.11, 38.47, 18.25.

**Cbz-L-Phe-L-Ile-OMe (7ad)**<sup>14</sup>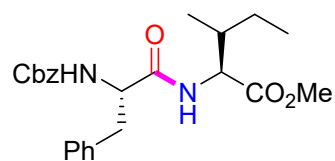

White solid, 97% yield (41.2 mg). <sup>1</sup>H NMR (400 MHz, CDCl<sub>3</sub>) δ 7.38 – 7.28 (m, 5H), 7.28 – 7.22 (m, 3H), 7.21 – 7.15 (m, 2H), 6.38 (br s, 1H), 5.43 (d, *J* = 6.7 Hz, 1H), 5.08 (s, 2H), 4.49 (dt, *J* = 10.3, 5.2 Hz, 2H), 3.68 (s, 3H), 3.17 – 2.98 (m, 2H), 1.84 – 1.78 (m, 1H), 1.37 – 1.28 (m, 1H), 1.14 – 0.96 (m, 1H), 0.86 (t, *J* = 7.4 Hz, 3H), 0.80 (d, *J* = 6.9 Hz, 3H). <sup>13</sup>C NMR (100 MHz, CDCl<sub>3</sub>) δ 171.66, 170.58, 155.89, 136.23, 136.09, 129.28, 128.63, 128.48, 128.14, 127.96, 126.96, 67.01, 56.51, 56.10, 52.02, 38.34, 37.74, 25.05, 15.22, 11.46.

**Cbz-L-Phe-L-Phe-OMe (7ae)**<sup>17</sup>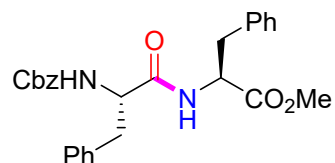

White solid, 97% yield (44.8 mg). <sup>1</sup>H NMR (400 MHz, CDCl<sub>3</sub>) δ 7.38 – 7.27 (m, 5H), 7.26 – 7.18 (m, 6H), 7.15 (d, *J* = 6.6 Hz, 2H), 6.96 (d, *J* = 4.1 Hz, 2H), 6.30 (d, *J* = 6.7 Hz, 1H), 5.30 (d, *J* = 6.7 Hz, 1H), 5.11 – 4.98 (m, 2H), 4.78 (dd, *J* = 13.5, 6.0 Hz, 1H), 4.42 (d, *J* = 6.6 Hz, 1H), 3.66 (s, 3H), 3.14 – 2.89 (m, 4H). <sup>13</sup>C NMR (100 MHz, CDCl<sub>3</sub>) δ 171.27, 170.33, 155.81, 136.17, 135.50, 129.30, 129.14, 128.64, 128.49, 128.15, 127.96, 127.08, 127.00, 67.01, 55.95, 53.25, 52.25, 38.26, 37.84.

**Cbz-L-Phe-L-Glu(OEt)-OEt (7af)**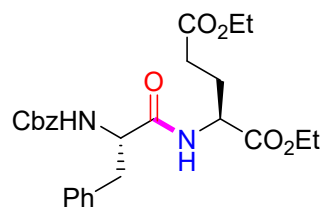

White solid, 97% yield (47.1 mg). m.p.: 118-120 °C. <sup>1</sup>H NMR (400 MHz, CDCl<sub>3</sub>) δ 7.40 – 7.25 (m, 8H), 7.22 – 7.08 (m, 2H), 6.57 (br s, 1H), 5.33 (s, 1H), 5.09 (s, 2H), 4.50 (d, *J* = 24.7 Hz, 2H), 4.13 (dd, *J* = 20.1, 6.6 Hz, 4H), 3.08 (s, 2H), 2.39 – 2.09 (m, 3H), 1.93 (s, 1H), 1.26 (s, 6H). <sup>13</sup>C NMR (100 MHz, CDCl<sub>3</sub>) δ 172.69, 171.14, 170.69, 155.80, 136.08, 129.30, 128.65, 128.49, 128.15, 128.01, 127.03, 67.05, 61.64, 60.67, 56.03, 51.76, 38.32, 30.00, 27.20, 14.12, 14.07. IR(KBr): 3435, 1580, 1418, 1368, 1025, 649 cm<sup>-1</sup>. HRMS (ESI): *m/z* Calcd. For C<sub>26</sub>H<sub>32</sub>N<sub>2</sub>O<sub>7</sub> [M+H]<sup>+</sup>: 485.22823, Found: 485.22776.

**Cbz-L-Phe-L-Asp(OMe)-OMe(7ag)**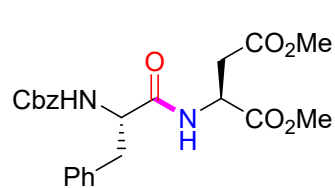

White solid, 80% yield (33.6 mg). m.p.: 130-132 °C. <sup>1</sup>H NMR (400 MHz, CDCl<sub>3</sub>) δ 7.38 – 7.29 (m, 5H), 7.27 – 7.21 (m, 3H), 7.20 – 7.13 (m, 2H), 6.84 (d, *J* = 7.2 Hz, 1H), 5.32 (br s, 1H), 5.07 (s, 2H), 4.89 – 4.70 (m, 1H), 4.48 (d, *J* = 5.5 Hz, 1H), 3.71 (s, 3H), 3.64 (s, 3H), 3.09 (d, *J* = 5.8 Hz, 2H), 2.98 (dd, *J* = 17.2, 3.6 Hz, 1H), 2.81 (d, *J* = 14.4 Hz, 1H). <sup>13</sup>C NMR (100 MHz, CDCl<sub>3</sub>) δ 171.17, 170.63, 170.57, 155.76, 136.11, 135.97, 129.29, 128.63, 128.48, 128.14, 127.99, 126.99, 67.01, 55.86, 52.77, 52.00, 48.54, 38.38, 35.88. IR(KBr): 3427, 1639, 1570, 1414, 1368, 1051, 1022, 644, 525 cm<sup>-1</sup>. HRMS (ESI): *m/z* Calcd. For C<sub>23</sub>H<sub>26</sub>N<sub>2</sub>O<sub>7</sub> [M+H]<sup>+</sup>: 443.18128, Found: 443.18088.

**Cbz-L-Phe-L-Lys(Cbz)-OMe (7ah)**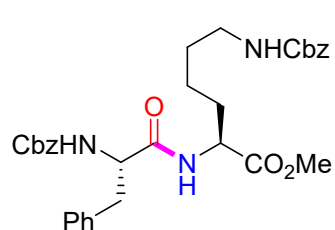

White solid, 97% yield (56.2 mg). m.p.: 124-126 °C. <sup>1</sup>H NMR (400 MHz, CDCl<sub>3</sub>) δ 7.36 – 7.29 (m, 7H), 7.28 – 7.19 (m, 6H), 7.15 (d,

$J = 6.9$  Hz, 2H), 6.52 (br s, 1H), 5.43 (br s, 1H), 5.17 – 4.95 (m, 5H), 4.62 – 4.33 (m, 2H), 3.69 (s, 3H), 3.23 – 2.92 (m, 4H), 1.81 – 1.58 (m, 2H), 1.52 – 1.38 (m, 2H), 1.31 – 1.13 (m, 2H).  $^{13}\text{C}$  NMR (100 MHz,  $\text{CDCl}_3$ )  $\delta$  17.11, 170.93, 156.53, 156.02, 136.53, 136.23, 136.07, 129.25, 128.58, 128.47, 128.45, 128.12, 128.06, 127.96, 126.93, 99.92, 67.01, 66.59, 56.08, 52.35, 51.97, 40.33, 38.30, 31.64, 29.11, 21.99. IR(KBr): 3468, 3413, 1638, 1614, 1566, 1414, 1022, 623  $\text{cm}^{-1}$ . HRMS (ESI):  $m/z$  Calcd. For  $\text{C}_{32}\text{H}_{37}\text{N}_3\text{O}_7$   $[\text{M}+\text{H}]^+$ : 576.27043, Found: 576.26986.

**Cbz-L-Phe-L-Tyr(Bz)-OMe (7ai)**<sup>18</sup>

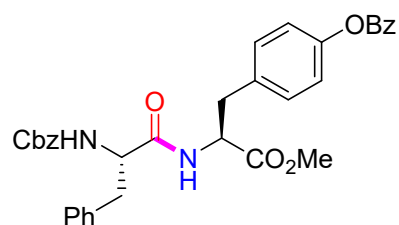

White solid, 96% yield (54.8 mg).  $^1\text{H}$  NMR (400 MHz,  $\text{CDCl}_3$ )  $\delta$  7.42 – 7.35 (m, 4H), 7.34 – 7.25 (m, 7H), 7.24 – 7.13 (m, 4H), 6.91 – 6.78 (m, 4H), 6.21 (d,  $J = 7.2$  Hz, 1H), 5.25 (br s, 1H), 5.07 (t,  $J = 13.5$  Hz, 2H), 4.99 (s, 2H), 4.73 (dd,  $J = 13.3, 5.9$  Hz, 1H), 4.41 (d,  $J = 6.6$  Hz, 1H), 3.66 (s, 3H), 3.12 – 2.86 (m, 4H).  $^{13}\text{C}$  NMR (100 MHz,  $\text{CDCl}_3$ )  $\delta$  171.33, 170.24, 157.90, 155.84, 136.89, 136.18, 130.20, 129.34, 128.68, 128.54, 128.53, 128.19, 127.99, 127.94, 127.71, 127.46, 127.03, 114.88, 69.92, 67.07, 55.99, 53.38, 52.27, 38.26, 37.00.

**Cbz-L-Phe-L-Ser-OMe (7aj)**<sup>14</sup>

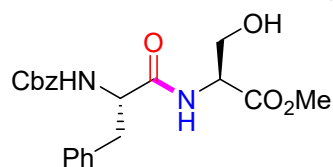

White solid, 84% yield (32.1 mg).  $^1\text{H}$  NMR (400 MHz,  $\text{CDCl}_3$ )  $\delta$  7.36 – 7.26 (m, 5H), 7.25 – 7.14 (m, 5H), 7.05 (br s, 1H), 5.58 (d,  $J = 6.6$  Hz, 1H), 5.02 (dd,  $J = 27.6, 12.2$  Hz, 2H), 4.64 – 4.42 (m, 2H), 3.87 (s, 2H), 3.71 (s, 3H), 3.22 (s, 1H), 3.12 (dd,  $J = 13.9, 6.1$  Hz, 1H), 3.02 (dd,  $J = 13.6, 7.7$  Hz, 1H).  $^{13}\text{C}$  NMR (100 MHz,  $\text{CDCl}_3$ )  $\delta$  171.40, 170.50, 156.28, 136.13, 135.95, 129.27, 128.62, 128.48, 128.18, 127.99, 127.03, 77.32, 67.15, 62.69, 56.19, 54.79, 52.68, 38.35.

**Cbz-L-Phe-L-Thr-OMe (7ak)**<sup>14</sup>

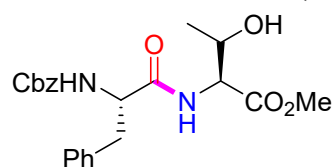

Colorless oil, 92% yield (36.0 mg).  $^1\text{H}$  NMR (400 MHz,  $\text{CDCl}_3$ )  $\delta$  7.35 – 7.15 (m, 10H), 7.00 (br s, 1H), 5.60 (br s, 1H), 5.12 – 4.93 (m, 2H), 4.64 – 4.48 (m, 2H), 4.26 (s, 1H), 3.68 (s, 3H), 3.27 – 2.89 (m, 3H), 1.11 (d,  $J = 6.2$  Hz, 3H).  $^{13}\text{C}$  NMR (100 MHz,  $\text{CDCl}_3$ )  $\delta$  171.67, 171.06, 156.11, 136.18, 136.04, 129.32, 128.52, 128.45, 128.12, 127.93, 126.91, 68.08, 67.04, 57.37, 56.07, 52.53, 38.21, 19.72.

**Cbz-L-Leu-Gly-OMe (7db)**<sup>13</sup>

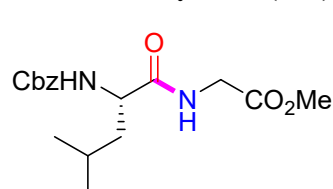

White solid, 95% yield (32.0 mg).  $^1\text{H}$  NMR (400 MHz,  $\text{CDCl}_3$ )  $\delta$  7.34 – 7.27 (m, 5H), 6.79 (br s, 1H), 5.40 (d,  $J = 6.0$  Hz, 1H), 5.10 (d,  $J = 7.0$  Hz, 2H), 4.28 (s, 1H), 4.02 (s, 2H), 3.73 (s, 3H), 1.68 (d,  $J = 5.5$  Hz, 2H), 1.59 – 1.48 (m, 1H), 0.93 (s, 6H).  $^{13}\text{C}$  NMR (100 MHz,  $\text{CDCl}_3$ )  $\delta$  172.57, 170.12, 156.26, 136.08, 128.48, 128.15, 127.99, 67.06, 53.34, 52.31, 41.30, 41.07, 24.60, 22.88, 21.87.

**Cbz-L-Met-Gly-OMe (7eb)**<sup>13</sup>

White solid, 87% yield (30.9 mg).  $^1\text{H}$  NMR (400 MHz,  $\text{CDCl}_3$ )  $\delta$  7.39 – 7.28 (m, 5H), 6.93 (br s,

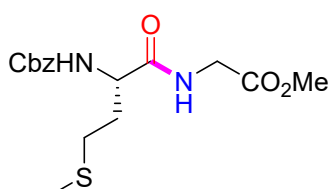

1H), 5.76 (d,  $J = 8.0$  Hz, 1H), 5.10 (q,  $J = 12.2$  Hz, 2H), 4.45 (dd,  $J = 14.1, 7.0$  Hz, 1H), 4.15 – 3.88 (m, 2H), 3.73 (s, 3H), 2.59 (t,  $J = 7.2$  Hz, 2H), 2.16 – 2.01 (m, 4H), 1.98 (dd,  $J = 14.4, 7.3$  Hz, 1H).  $^{13}\text{C}$  NMR (100 MHz,  $\text{CDCl}_3$ )  $\delta$  171.58, 169.98, 156.11, 136.02, 128.48, 128.17, 128.01, 67.08, 53.61, 52.34, 41.06, 31.53, 29.87, 15.11.

#### Cbz-L-Met-L-Leu-OMe (7ea)

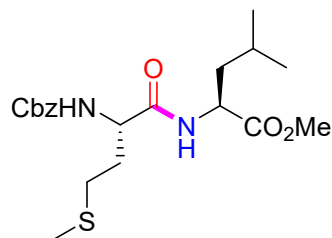

White solid, 88% yield (35.1 mg). m.p.: 83-85 °C.  $^1\text{H}$  NMR (400 MHz,  $\text{CDCl}_3$ )  $\delta$  7.39 – 7.28 (m, 5H), 6.61 (d,  $J = 7.8$  Hz, 1H), 5.59 (d,  $J = 8.1$  Hz, 1H), 5.11 (s, 2H), 4.59 (td,  $J = 8.8, 4.9$  Hz, 1H), 4.43 (dd,  $J = 14.5, 7.0$  Hz, 1H), 3.73 (s, 3H), 2.61 (t,  $J = 7.0$  Hz, 2H), 2.15 – 1.93 (m, 5H), 1.70 – 1.48 (m, 3H), 0.93 (d,  $J = 2.3$  Hz, 3H), 0.91 (d,  $J = 2.2$  Hz, 3H).  $^{13}\text{C}$  NMR (100 MHz,  $\text{CDCl}_3$ )  $\delta$  172.99, 170.87, 155.92, 136.10, 128.51, 128.18, 128.01, 67.02, 53.36, 52.30, 50.78, 41.19, 31.56, 29.80, 24.78, 22.73, 21.77, 14.95. IR(KBr): 3429, 1639, 1565, 1413, 1050, 1022, 804, 644, 523  $\text{cm}^{-1}$ . HRMS (ESI):  $m/z$  Calcd. For  $\text{C}_{19}\text{H}_{28}\text{N}_2\text{O}_5\text{S}$   $[\text{M}+\text{H}]^+$ : 411.19482, Found: 411.19439.

#### Cbz-L-Gln(Trt)-L-Leu-OMe (7fa)

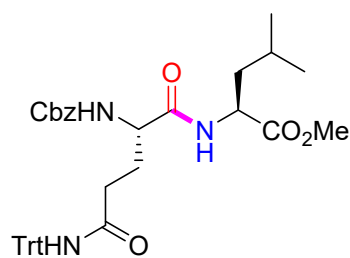

White solid, 80% yield (51.9 mg). m.p.: 68-70 °C.  $^1\text{H}$  NMR (400 MHz,  $\text{CDCl}_3$ )  $\delta$  7.36 – 7.17 (m, 20H), 7.04 – 6.84 (m, 2H), 5.79 (d,  $J = 6.3$  Hz, 1H), 5.17 – 5.00 (m, 2H), 4.45 (td,  $J = 9.3, 4.6$  Hz, 1H), 4.16 (dd,  $J = 13.2, 6.6$  Hz, 1H), 3.66 (s, 3H), 2.55 (t,  $J = 6.1$  Hz, 2H), 2.15 – 1.92 (m, 2H), 1.59 – 1.36 (m, 3H), 0.85 (s, 3H), 0.84 (s, 3H).  $^{13}\text{C}$  NMR (100 MHz,  $\text{CDCl}_3$ )  $\delta$  173.16, 171.94, 171.29, 156.03, 144.48, 136.31, 128.65, 128.46, 128.07, 128.01, 127.94, 127.01, 70.66, 66.81, 53.56, 52.19, 50.88, 40.51, 33.33, 29.64, 24.61, 22.73, 21.56. IR(KBr): 3425, 1643, 1581, 1414, 1368, 1051, 1022, 699, 644, 524  $\text{cm}^{-1}$ . HRMS (ESI):  $m/z$  Calcd. For  $\text{C}_{39}\text{H}_{43}\text{N}_3\text{O}_6$   $[\text{M}+\text{H}]^+$ : 650.32246, Found: 650.32172.

#### Cbz-L-Gln(Trt)-L-Phe-OMe (7fe)

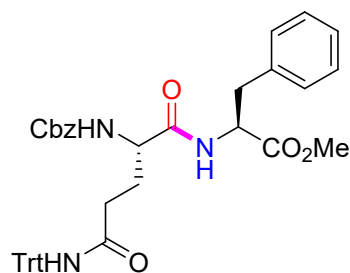

White solid, 97% yield (61.7 mg). m.p.: 68-70 °C.  $^1\text{H}$  NMR (400 MHz,  $\text{CDCl}_3$ )  $\delta$  7.35 – 7.10 (m, 24H), 7.03 (d,  $J = 5.8$  Hz, 2H), 6.93 (s, 1H), 5.81 (d,  $J = 6.4$  Hz, 1H), 5.15 – 4.96 (m, 2H), 4.68 (dd,  $J = 13.2, 7.6$  Hz, 1H), 4.11 (dd,  $J = 14.2, 7.0$  Hz, 1H), 3.65 (s, 3H), 3.05 (dd,  $J = 13.9, 5.4$  Hz, 1H), 2.89 (dd,  $J = 13.8, 7.7$  Hz, 1H), 2.41 (s, 2H), 2.04 – 1.89 (m, 2H).  $^{13}\text{C}$  NMR (100 MHz,  $\text{CDCl}_3$ )  $\delta$  177.64, 171.79, 171.13, 156.08, 144.44, 136.25, 135.87, 129.11, 128.64, 128.49, 128.43, 128.05, 127.99, 127.91, 126.99, 126.94, 70.63, 66.82, 53.85, 53.58, 52.25, 37.50, 33.18, 29.47, 29.00. IR(KBr): 3466, 3412, 1638, 1614, 1413, 1022, 624  $\text{cm}^{-1}$ . HRMS (ESI):  $m/z$  Calcd. For  $\text{C}_{42}\text{H}_{41}\text{N}_3\text{O}_6$   $[\text{M}+\text{H}]^+$ : 684.30681, Found: 684.30605.

#### Boc-L-Trp(Boc)-L-Leu-OMe (7ga)

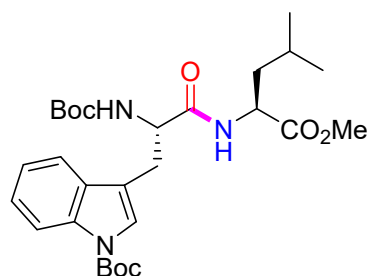

White solid, 85% yield (45.1 mg). m.p.: 56-58 °C.  $^1\text{H}$  NMR (400 MHz,  $\text{CDCl}_3$ )  $\delta$  8.13 (d,  $J = 7.6$  Hz, 1H), 7.60 (d,  $J = 7.7$  Hz,

1H), 7.46 (s, 1H), 7.31 (t,  $J = 7.3$  Hz, 1H), 7.24 (t,  $J = 7.5$  Hz, 1H), 6.28 (d,  $J = 8.2$  Hz, 1H), 5.16 (br s, 1H), 4.54 (td,  $J = 8.5, 5.1$  Hz, 1H), 4.45 (d,  $J = 6.1$  Hz, 1H), 3.66 (s, 3H), 3.31 – 2.98 (m, 2H), 1.66 (s, 9H), 1.54 (dd,  $J = 10.3, 4.0$  Hz, 2H), 1.43 (s, 10H), 0.87 (t,  $J = 6.3$  Hz, 6H).  $^{13}\text{C}$  NMR (100 MHz,  $\text{CDCl}_3$ )  $\delta$  172.65, 170.85, 155.35, 149.51, 135.48, 130.23, 124.51, 124.35, 122.64, 119.03, 115.40, 115.19, 83.51, 80.18, 54.42, 52.18, 50.70, 41.62, 28.21, 28.15, 27.80, 24.60, 22.66, 21.84. IR(KBr): 3417, 2960, 2934, 1733, 1658, 1568, 1369, 1256, 1160, 1087, 1052, 766, 747  $\text{cm}^{-1}$ . HRMS (ESI):  $m/z$  Calcd. For  $\text{C}_{28}\text{H}_{41}\text{N}_3\text{O}_7$   $[\text{M}+\text{H}]^+$ : 532.30173, Found: 532.30131.

#### Boc-L-His(Trt)-L-Leu-OMe (7ha)

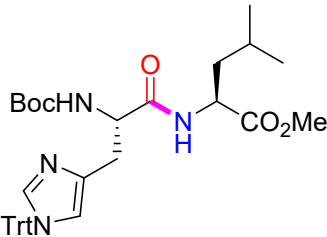 White solid, 71% yield (44.1 mg). m.p.: 57-59 °C.  $^1\text{H}$  NMR (400 MHz,  $\text{CDCl}_3$ )  $\delta$  7.56 – 7.44 (m, 1H), 7.37 – 7.29 (m, 10H), 7.10 (dd,  $J = 6.7, 3.0$  Hz, 6H), 6.66 (s, 1H), 6.23 (br s, 1H), 4.64 – 4.35 (m, 2H), 3.66 (s, 3H), 3.09 – 2.89 (m, 2H), 1.64 – 1.47 (m, 3H), 1.43 (s, 9H), 0.87 (dd,  $J = 5.9, 3.1$  Hz, 6H).  $^{13}\text{C}$  NMR (100 MHz,  $\text{CDCl}_3$ )  $\delta$  178.35, 173.04, 171.52, 155.77, 142.29, 138.30, 136.93, 129.71, 128.02, 128.00, 119.40, 79.62, 75.26, 54.27, 52.06, 50.77, 41.39, 30.24, 29.64, 28.29, 24.69, 22.74, 21.89. IR(KBr): 3467, 3413, 1637, 1614, 1413, 622  $\text{cm}^{-1}$ . HRMS (ESI):  $m/z$  Calcd. For  $\text{C}_{37}\text{H}_{44}\text{N}_4\text{O}_5$   $[\text{M}+\text{H}]^+$ : 625.33845, Found: 625.33769.

#### Cbz-L-Phe-L-Val-OMe (7al)<sup>19</sup>

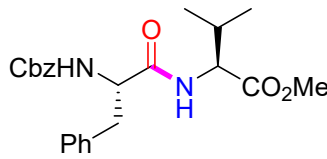 White solid, 97% yield (40.0 mg).  $^1\text{H}$  NMR (400 MHz,  $\text{CDCl}_3$ )  $\delta$  7.39 – 7.15 (m, 10H), 6.32 (d,  $J = 5.4$ , 1H), 5.38 (d,  $J = 5.7$ , 1H), 5.18 – 5.01 (m, 2H), 4.45 (dd,  $J = 8.6, 5.1$  Hz, 2H), 3.68 (s, 3H), 3.18 – 2.98 (m, 2H), 2.08 (dq,  $J = 13.5, 6.8$  Hz, 1H), 0.84 (d,  $J = 6.9$  Hz, 3H), 0.80 (d,  $J = 6.9$  Hz, 3H).  $^{13}\text{C}$  NMR (100 MHz,  $\text{CDCl}_3$ )  $\delta$  171.68, 170.72, 155.92, 136.25, 136.11, 129.30, 128.66, 128.50, 128.16, 128.00, 127.00, 67.05, 57.27, 56.19, 52.07, 38.30, 31.17, 18.75, 17.72.

#### Cbz-L-Phe-Aib-OMe (7am)<sup>14</sup>

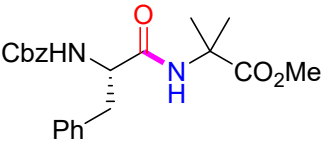 White solid, 73% yield (29.2 mg).  $^1\text{H}$  NMR (400 MHz,  $\text{CDCl}_3$ )  $\delta$  7.35 – 7.29 (m, 6H), 7.27 – 7.20 (m, 4H), 6.19 (s, 1H), 5.41 (br s, 1H), 5.09 (s, 2H), 4.37 (d,  $J = 6.1$  Hz, 1H), 3.69 (s, 3H), 3.13 (dd,  $J = 13.5, 5.6$  Hz, 1H), 2.99 (dd,  $J = 13.7, 7.8$  Hz, 1H), 1.43 (s, 3H), 1.40 (s, 3H).  $^{13}\text{C}$  NMR (100 MHz,  $\text{CDCl}_3$ )  $\delta$  174.45, 169.72, 155.87, 136.48, 136.20, 129.45, 128.64, 128.49, 128.15, 127.97, 127.02, 66.98, 56.51, 56.22, 52.58, 38.64, 24.54, 24.41.

#### Cbz-L-Ala-Aib-OMe (7im)<sup>14</sup>

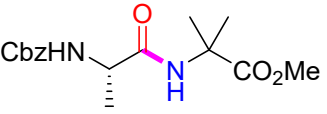 Colorless oil, 73% yield (23.5 mg).  $^1\text{H}$  NMR (400 MHz,  $\text{CDCl}_3$ )  $\delta$  7.39 – 7.28 (m, 5H), 6.66 (br s, 1H), 5.37 (br s, 1H), 5.12 (s, 2H), 4.22 (s, 1H), 3.72 (s, 3H), 1.53 (s, 3H), 1.52 (s, 3H), 1.37 (d,  $J = 7.0$  Hz, 3H).  $^{13}\text{C}$  NMR (100 MHz,  $\text{CDCl}_3$ )  $\delta$  174.73, 171.40, 155.99, 136.20, 128.50, 128.48, 128.17, 128.00, 66.97, 56.48, 52.63, 50.46, 24.67, 24.63, 18.39.



### Cbz-L-NMePhe-L-Leu-OMe (7ja)

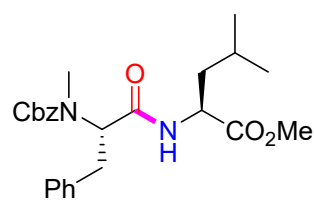

Colorless oil, 95% yield (42.0 mg).  $^1\text{H}$  NMR (400 MHz,  $\text{CDCl}_3$ )  $\delta$  7.40 – 7.30 (m, 3H), 7.29 – 7.11 (m, 7H), 6.42 (d,  $J = 7.1$  Hz, 0.58H), 6.12 (s, 0.34H), 5.14 – 4.81 (m, 3H), 4.58 (s, 1H), 3.70 (s, 3H), 3.40 – 3.25 (m, 1H), 3.07 – 2.90 (m, 1H), 2.84 (s, 3H), 1.56 (ddd,  $J = 24.4$ , 12.2, 5.8 Hz, 3H), 0.90 (s, 3H), 0.88 (s, 3H).  $^{13}\text{C}$  NMR (100 MHz,  $\text{CDCl}_3$ )  $\delta$  172.97, 172.84, 169.91, 169.68, 157.11, 155.96, 137.34, 137.08, 136.35, 135.90, 128.87, 128.48, 128.14, 128.02, 127.60, 126.57, 67.73, 67.45, 61.07, 60.07, 52.24, 50.71, 41.16, 34.04, 33.81, 31.28, 30.56, 24.85, 22.73, 21.72. IR(KBr): 3469, 3414, 1677, 1638, 1614, 1411, 1264, 1023, 747, 622, 474  $\text{cm}^{-1}$ . HRMS (ESI):  $m/z$  Calcd. For  $\text{C}_{25}\text{H}_{33}\text{N}_2\text{O}_5$   $[\text{M}+\text{H}]^+$ : 441.23840, Found: 441.23768.

### Cbz-L-NMePhe-L-Ile-OMe (7jd)<sup>14</sup>

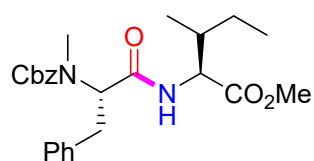

Colorless oil, 95% yield (41.6 mg).  $^1\text{H}$  NMR (400 MHz,  $\text{CDCl}_3$ )  $\delta$  7.36 – 7.30 (m, 3H), 7.26 – 7.11 (m, 7H), 6.56 (d,  $J = 8.2$  Hz, 0.61H), 6.26 (d,  $J = 7.2$  Hz, 0.33H), 5.11 (dd,  $J = 19.4$ , 12.6 Hz 2H), 5.02 – 4.78 (m, 1H), 4.54 (dd,  $J = 8.3$ , 5.0 Hz, 1H), 3.70 (s, 3H), 3.39 – 3.25 (m, 1H), 3.10 – 2.90 (m, 1H), 2.85 (d,  $J = 8.5$  Hz, 3H), 1.81 (d,  $J = 39.4$  Hz, 1H), 1.43 – 1.28 (m, 1H), 1.14 – 0.98 (m, 1H), 0.91 – 0.80 (m, 6H).  $^{13}\text{C}$  NMR (100 MHz,  $\text{CDCl}_3$ )  $\delta$  171.81, 169.91, 169.61, 157.12, 155.94, 137.33, 137.11, 136.38, 135.91, 128.86, 128.49, 128.11, 128.00, 127.64, 126.56, 67.75, 67.46, 61.13, 60.22, 56.33, 52.03, 37.63, 34.14, 33.83, 31.33, 30.65, 24.95, 15.40, 11.44.

### Cbz-L-NMePhe-L-Glu(OEt)-OEt (7jf)<sup>18</sup>

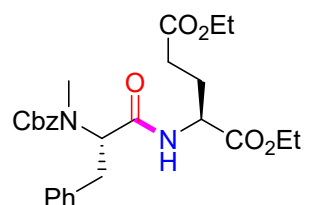

Colorless oil, 94% yield (46.7 mg).  $^1\text{H}$  NMR (400 MHz,  $\text{CDCl}_3$ )  $\delta$  7.37 – 7.26 (m, 4H),  $\delta$  7.25 – 7.10 (m, 6H), 6.77 – 6.55 (m, 1H), 5.16 – 4.75 (m, 3H), 4.53 (d,  $J = 5.4$  Hz, 1H), 4.25 – 4.01 (m, 4H), 3.32 (dd,  $J = 14.2$ , 6.6 Hz, 1H), 3.08 – 2.91 (m, 1H), 2.84 (s, 3H), 2.40 – 2.09 (m, 3H), 2.04 – 1.85 (m, 1H), 1.32 – 1.16 (m, 7H).  $^{13}\text{C}$  NMR (100 MHz,  $\text{CDCl}_3$ )  $\delta$  172.58, 171.26, 170.11, 156.96, 155.85, 137.37, 137.12, 136.40, 136.05, 128.85, 128.46, 128.08, 127.96, 127.61, 126.56, 67.62, 67.43, 61.56, 61.26, 60.61, 52.01, 51.71, 34.13, 33.95, 31.73, 31.57, 30.97, 30.06, 27.09, 26.84, 14.10, 14.06.

## 5 General Procedure for the preparation of tripeptides

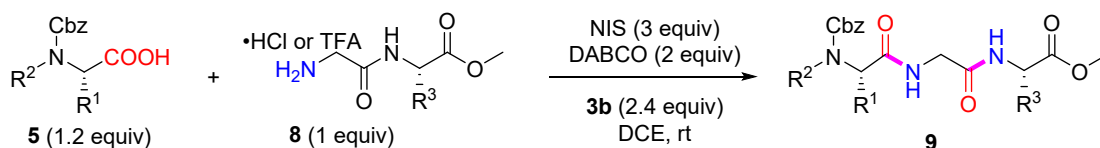

Amino acids **5** (0.12 mmol), dipeptides **8** (0.1 mmol) and DABCO (22.4 mg, 0.2 mmol) were placed in a 10 ml two-neck round bottom flask, and DCE (3 ml) was added in argon atmosphere. After 5 min, NIS (67.5 mg, 0.3 mmol) and **3b** (65.8 mg, 0.24 mmol) were added in sequence at rt. The resulting mixture was stirred at room temperature and monitored by TLC. After amine was fully consumed, the reaction was quenched with 5% sodium thiosulfate solution (5 mL) and extracted with DCM (6 mL x 3). The combined organic layer was washed with brine, dried over anhydrous MgSO<sub>4</sub>, and concentrated in vacuo to afford the crude product, which was then purified by silica gel flash chromatography to give the desired product **9**.

## 5.1. Characterization of the obtained tripeptides

### Cbz-L-Met-Gly-Gly-OMe (9aa)

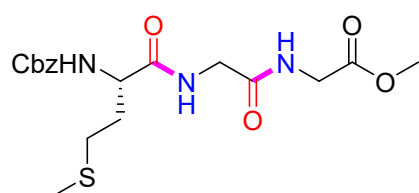

White solid, 98% yield (40.0 mg). m.p.: 108-110 °C. <sup>1</sup>H NMR (400 MHz, CDCl<sub>3</sub>) δ 7.45 – 7.12 (m, 7H), 6.02 (br s, 1H), 5.08 (dd, *J* = 24.9, 12.1 Hz, 2H), 4.39 (d, *J* = 6.3 Hz, 1H), 4.01 (dt, *J* = 27.9, 13.8 Hz, 4H), 3.70 (s, 3H), 2.55 (t, *J* = 6.8 Hz, 2H), 2.17 – 2.02 (m, 4H), 1.95 (dd, *J* = 13.8, 6.9 Hz, 1H). <sup>13</sup>C NMR (100 MHz, CDCl<sub>3</sub>) δ 172.21, 170.22, 169.19, 156.41, 136.00, 128.50, 128.20, 128.00, 67.14, 54.18, 52.32, 42.92, 41.04, 31.40, 30.03, 15.22. IR(KBr): 3456, 3418, 1637, 1615, 1413, 749 cm<sup>-1</sup>. HRMS (ESI): *m/z* Calcd. For C<sub>18</sub>H<sub>25</sub>N<sub>3</sub>O<sub>6</sub> [M+H]<sup>+</sup>: 412.15368, Found: 412.15326.

### Cbz-L-Phe-Gly-Gly-OMe (9ba)

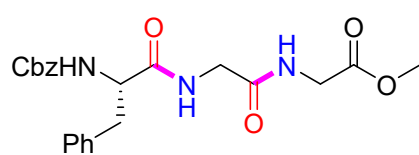

Brown solid, 88% yield (37.1 mg). m.p.: 70-72 °C. <sup>1</sup>H NMR (400 MHz, CDCl<sub>3</sub>) δ 7.35 – 7.15 (m, 11H), 7.06 (s, 1H), 5.79 (d, *J* = 7.0 Hz, 1H), 5.01 (q, *J* = 12.3 Hz, 2H), 4.50 (d, *J* = 6.9 Hz, 1H), 4.05 – 3.80 (m, 4H), 3.68 (s, 3H), 3.11 (dd, *J* = 13.8, 6.3 Hz, 1H), 2.99 (dd, *J* = 13.5, 7.6 Hz, 1H). <sup>13</sup>C NMR (100 MHz, CDCl<sub>3</sub>) δ 171.93, 170.13, 169.11, 156.25, 136.27, 136.00, 129.17, 128.58, 128.52, 128.49, 128.45, 128.12, 127.89, 126.96, 67.03, 56.35, 52.25, 42.88, 40.99, 38.25. IR(KBr): 3470, 3413, 1639, 1615, 1561, 1412, 1261, 749 cm<sup>-1</sup>. HRMS (ESI): *m/z* Calcd. For C<sub>22</sub>H<sub>25</sub>N<sub>3</sub>O<sub>6</sub> [M+H]<sup>+</sup>: 428.18161, Found: 428.18117.

### Cbz-L-Leu-Gly-Gly-OMe (9ca)

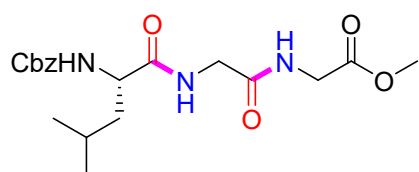

Brown oil, 92% yield (36.3 mg). <sup>1</sup>H NMR (400 MHz, CDCl<sub>3</sub>) δ 7.39 – 7.25 (m, 7H), 5.73 (d, *J* = 7.0 Hz, 1H), 5.06 (dd, *J* = 29.9, 12.2 Hz, 2H), 4.22 (s, 1H), 4.09 – 3.86 (m, 4H), 3.70 (s, 3H), 1.72 – 1.49 (m, 3H), 0.92 (s, 6H). <sup>13</sup>C NMR (100 MHz, CDCl<sub>3</sub>) δ 173.23, 170.20, 169.36, 156.53, 136.04, 128.48, 128.16, 127.92, 67.07, 53.84, 52.24, 42.91, 41.14, 41.01, 24.63, 22.86, 21.79. IR(KBr): 3417, 1639, 1613, 1567, 1412, 1274, 1022, 750, 643 cm<sup>-1</sup>. HRMS (ESI): *m/z* Calcd. For C<sub>19</sub>H<sub>27</sub>N<sub>3</sub>O<sub>6</sub> [M+H]<sup>+</sup>: 394.19726, Found: 394.19689.

### Cbz-L-Met-Gly-L-Leu-OMe (9ab)

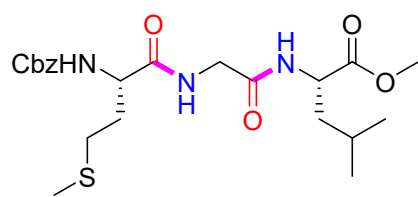

White solid, 86% yield (40.2 mg). m.p.: 83-85 °C. <sup>1</sup>H NMR (400 MHz, CDCl<sub>3</sub>) δ 7.41 – 7.29 (m, 5H), 7.14 (s, 1H), 6.89 (br s, 1H), 5.77 (br s, 1H), 5.10 (dd, *J* = 28.8, 12.1 Hz, 2H), 4.60 (dd, *J* = 12.7, 8.1 Hz, 1H), 4.37 (dd, *J* = 13.7, 7.1 Hz, 1H), 4.15 – 4.01 (m, 1H), 3.89 (dd, *J* = 16.5, 4.5 Hz, 1H), 3.70 (s, 3H), 2.56 (t, *J* = 7.0 Hz, 2H), 2.14 – 1.92 (m, 5H), 1.72 – 1.51 (m, 3H), 0.92 (s, 3H), 0.91 (s, 3H). <sup>13</sup>C NMR (100 MHz, CDCl<sub>3</sub>) δ 173.27, 171.84, 168.46, 156.25, 135.97, 128.59, 128.54, 128.25, 128.08, 67.22, 54.14, 52.30, 50.82, 43.07, 41.19, 31.24, 30.07, 24.78, 22.74, 21.83, 15.24. IR(KBr): 3420, 1640, 1567, 1413, 1022, 750 cm<sup>-1</sup>. HRMS (ESI): *m/z* Calcd. For C<sub>22</sub>H<sub>33</sub>N<sub>3</sub>O<sub>6</sub>S [M+H]<sup>+</sup>: 468.21628, Found: 468.21589.

#### Cbz-L-Phe-Gly-L-Leu-OMe (9bb)

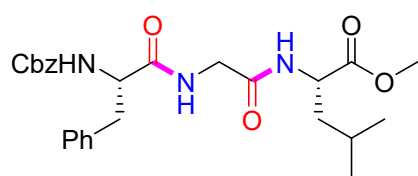

Yellow solid, 95% yield (46.0 mg). m.p.: 90-92 °C. <sup>1</sup>H NMR (400 MHz, CDCl<sub>3</sub>) δ 7.36 – 7.26 (m, 6H), 7.26 – 7.20 (m, 2H), 7.15 (d, *J* = 6.8 Hz, 2H), 6.96 – 6.81 (m, 2H), 5.47 (d, *J* = 7.1 Hz, 1H), 5.04 (q, *J* = 12.2 Hz, 2H), 4.66 – 4.53 (m, 1H), 4.39 (q, *J* = 7.1 Hz, 1H), 4.18 – 4.00 (m, 1H), 3.76 (dd, *J* = 16.7, 4.4 Hz, 1H), 3.69 (s, 3H), 3.13 (dd, *J* = 13.8, 6.3 Hz, 1H), 3.02 (dd, *J* = 13.5, 7.7 Hz, 1H), 1.66 – 1.55 (m, 3H), 0.92 (dd, *J* = 5.7, 2.6 Hz, 6H). <sup>13</sup>C NMR (100 MHz, CDCl<sub>3</sub>) δ 173.28, 171.52, 168.43, 156.13, 136.14, 135.86, 129.13, 128.73, 128.51, 128.24, 128.06, 127.10, 67.15, 56.53, 52.31, 50.75, 43.00, 41.04, 37.93, 24.72, 22.77, 21.78. IR(KBr): 3469, 3415, 1638, 1615, 1566, 1413, 1368, 1022, 750, 641 cm<sup>-1</sup>. HRMS (ESI): *m/z* Calcd. For C<sub>26</sub>H<sub>33</sub>N<sub>3</sub>O<sub>6</sub> [M+H]<sup>+</sup>: 484.24421, Found: 484.24376.

#### Cbz-L-Leu-Gly-L-Leu-OMe (9cb)

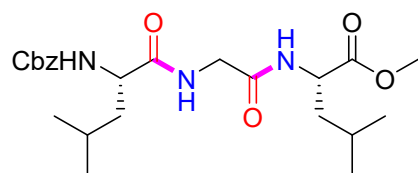

White solid, 96% yield (42.9 mg). m.p.: 92-94 °C. <sup>1</sup>H NMR (400 MHz, CDCl<sub>3</sub>) δ 7.37 – 7.28 (m, 5H), 7.19 (s, 1H), 7.07 (d, *J* = 6.5 Hz, 1H), 5.52 (d, *J* = 5.6 Hz, 1H), 5.13 (d, *J* = 12.1 Hz, 1H), 5.03 (d, *J* = 12.2 Hz, 1H), 4.59 (dd, *J* = 12.8, 8.0 Hz, 1H), 4.26 – 4.05 (m, 2H), 3.86 (dd, *J* = 16.6, 4.6 Hz, 1H), 3.69 (s, 3H), 1.66 – 1.53 (m, 6H), 0.96 – 0.86 (m, 12H). <sup>13</sup>C NMR (100 MHz, CDCl<sub>3</sub>) δ 173.31, 172.96, 168.74, 156.35, 135.99, 128.50, 128.19, 128.01, 67.10, 53.74, 52.26, 50.78, 43.05, 41.16, 41.04, 24.72, 24.63, 22.88, 22.73, 21.84, 21.80. IR(KBr): 3465, 3417, 2957, 1641, 1614, 1564, 1413, 1261, 1023, 750, 643 cm<sup>-1</sup>. HRMS (ESI): *m/z* Calcd. For C<sub>23</sub>H<sub>35</sub>N<sub>3</sub>O<sub>6</sub> [M+H]<sup>+</sup>: 450.25986, Found: 450.25955.

#### Cbz-L-NMePhe-Gly-Gly-OMe (9da)

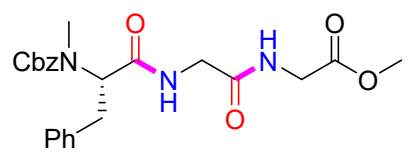

Colorless oil, 95% yield (42.1). <sup>1</sup>H NMR (400 MHz, CDCl<sub>3</sub>) δ 7.38 – 7.29 (m, 3H), 7.28 – 7.08 (m, 7H), 7.03 – 6.73 (m, 2H), 5.09 (s, 1H), 5.01 – 4.83 (m, 1H), 4.79 – 4.67 (m, 1H), 4.12 – 3.82 (m, 4H), 3.72 (s, 3H), 3.38 (dd, *J* = 14.2, 5.6 Hz, 1H), 3.13 – 2.92 (m, 1H), 2.89 – 2.76 (m, 3H). <sup>13</sup>C NMR (100 MHz, CDCl<sub>3</sub>) δ 170.82, 170.12, 169.15, 168.74, 157.01, 155.94, 137.17, 136.20, 135.90, 128.92, 128.52, 128.45, 128.04, 127.61,

126.64, 67.52, 61.76, 61.11, 52.28, 42.91, 40.96, 34.10, 32.36, 31.56. IR(KBr): 3464, 3415, 1639, 1615, 1568, 1412, 1022, 642  $\text{cm}^{-1}$ . HRMS (ESI):  $m/z$  Calcd. For  $\text{C}_{23}\text{H}_{27}\text{N}_3\text{O}_6$   $[\text{M}+\text{H}]^+$ : 442.19726, Found: 442.19702.

### Cbz-L-NMePhe-Gly-L-Leu-OMe (9db)

Yellow oil, 83% yield (41.4 mg).  $^1\text{H}$  NMR (400 MHz,  $\text{CDCl}_3$ )  $\delta$  7.39 – 7.27 (m, 4H), 7.25 – 7.08 (m, 6H), 7.01 (d,  $J = 7.8$  Hz, 1H), 6.87 (d,  $J = 5.1$  Hz, 1H), 6.78 – 6.61 (m, 1H), 5.17 – 4.86 (m, 2H), 4.66 – 4.49 (m, 2H), 4.20 (dd,  $J = 16.8, 6.7$  Hz, 1H), 4.05 – 3.82 (m, 1H), 3.79 – 3.64 (m, 4H), 3.43 – 3.36 (m, 1H), 3.10 (dd,  $J = 14.1, 10.3$  Hz, 1H), 2.98 – 2.85 (m, 1H), 2.73 (s, 2H), 1.72 – 1.61 (m, 3H), 0.94 (t,  $J = 5.5$  Hz, 6H).  $^{13}\text{C}$  NMR (100 MHz,  $\text{CDCl}_3$ )  $\delta$  173.44, 173.16, 170.52, 168.75, 168.35, 156.86, 155.76, 137.38, 136.17, 128.95, 128.81, 128.54, 128.50, 128.48, 128.46, 128.12, 127.86, 126.63, 67.64, 62.81, 61.01, 52.19, 50.72, 43.01, 40.94, 33.97, 33.43, 24.72, 22.78, 21.72. IR(KBr): 3327, 2957, 1744, 1679, 1581, 1438, 1408, 1369, 1333, 1206, 1153, 1024, 980, 750, 700  $\text{cm}^{-1}$ . HRMS (ESI):  $m/z$  Calcd. For  $\text{C}_{27}\text{H}_{35}\text{N}_3\text{O}_6$   $[\text{M}+\text{H}]^+$ : 498.25986, Found: 498.25989.

## 6 Synthetic applications

### 6.1 The Synthesis of Protected Leu-enkephalin

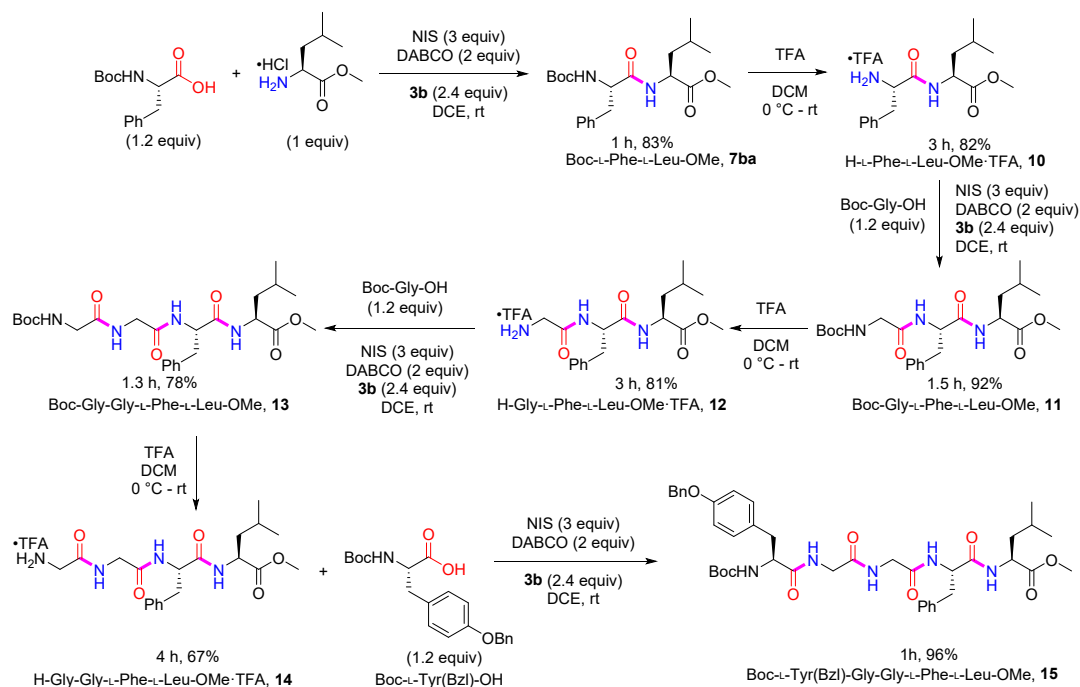

**H-L-Phe-L-Leu-OMe•TFA (10)**<sup>14</sup>: Boc-L-Phe-L-Leu-Me (7ba, 313.99 mg, 0.8 mmol) was dissolved in 4 mL of DCM and TFA (4 mL) was added dropwise at 0 °C. After 1 h, the mixture was

allowed to warm to room temperature and stirred for 2 h. After the reaction was finished, the solvent was removed under reduced pressure and the addition of DCM and ether to the residue led to the precipitation of a white crystal, which was washed with ether and dried in vacuo to give product **10** (218.7 mg, 82% yield). <sup>1</sup>H NMR (400 MHz, DMSO-*d*<sub>6</sub>) δ 8.85 (d, *J* = 7.6 Hz, 1H), 8.16 (s, 3H), 7.31 (dt, *J* = 23.5, 7.4 Hz, 5H), 4.35 (dd, *J* = 14.4, 8.1 Hz, 1H), 4.05 (t, *J* = 6.5 Hz, 1H), 3.63 (s, 3H), 3.12 (dd, *J* = 14.1, 5.4 Hz, 1H), 2.94 (dd, *J* = 14.0, 7.8 Hz, 1H), 1.73 – 1.47 (m, 3H), 0.89 (dd, *J* = 16.8, 6.4 Hz, 6H). <sup>13</sup>C NMR (100 MHz, DMSO-*d*<sub>6</sub>) δ 172.17, 168.22, 134.73, 129.52, 128.54, 127.19, 53.22, 52.07, 50.44, 36.87, 24.04, 22.72, 21.29.

**Boc-Gly-L-Phe-L-Leu-OMe (11)**<sup>20</sup>: Boc-Gly-OH (21.0mg, 0.12 mmol), H-L-Phe-L-Leu-OH•TFA (**10**, 10.64mg, 0.1 mmol) and DABCO (22.4 mg, 0.2 mmol) were placed in a 10 ml two-neck round bottom flask, and DCE (3 ml) was added in argon atmosphere. After 5 min, NIS (67.5 mg, 0.3 mmol) and **3b** (65.8 mg, 0.24 mmol) were added in sequence at rt. The resulting mixture was stirred at room temperature and monitored by TLC. After amine was fully consumed, the reaction was quenched with 5% sodium thiosulfate solution (5 mL) and extracted with DCM (6 mL x 3). The combined organic layer was washed with brine, dried over anhydrous MgSO<sub>4</sub>, and concentrated in vacuo to afford the crude product, which was then purified by silica gel flash chromatography to give the desired product **11** (41.3 mg, 92% yield). <sup>1</sup>H NMR (400 MHz, CDCl<sub>3</sub>) δ 7.29 – 7.22 (m, 3H), 7.21 – 7.18 (m, 2H), 6.93 (d, *J* = 8.0 Hz, 1H), 6.64 (d, *J* = 6.7 Hz, 1H), 5.30 (t, *J* = 5.4 Hz, 1H), 4.75 (q, *J* = 6.8 Hz, 1H), 4.57 – 4.46 (m, 1H), 3.85 – 3.71 (m, 2H), 3.69 (s, 3H), 3.14 – 3.01 (m, 2H), 1.63 – 1.45 (m, 3H), 1.43 (s, 9H), 0.88 (d, *J* = 5.8 Hz, 6H). <sup>13</sup>C NMR (100 MHz, CDCl<sub>3</sub>) δ 172.69, 170.44, 169.36, 155.98, 136.24, 129.33, 128.53, 126.94, 80.20, 54.08, 52.19, 50.85, 44.20, 41.13, 38.08, 28.22, 24.64, 22.62, 21.82.

**Boc-Gly-Gly-L-Phe-L-Leu-OMe (13)**<sup>14</sup>: Boc-Gly-OH (21.0mg, 0.12 mmol), H-Gly-L-Phe-L-Leu-OMe•TFA (**12**, 44.65mg, 0.1 mmol) and DABCO (22.4 mg, 0.2 mmol) were placed in a 10 ml two-neck round bottom flask, and DCE (3 ml) was added in argon atmosphere. After 5 min, NIS (67.5 mg, 0.3 mmol) and **3b** (65.8 mg, 0.24 mmol) were added in sequence at rt. The resulting mixture was stirred at room temperature and monitored by TLC. After amine was fully consumed, the reaction was quenched with 5% sodium thiosulfate solution (5 mL) and extracted with DCM (6 mL x 3). The combined organic layer was washed with brine, dried over anhydrous MgSO<sub>4</sub>, and concentrated in vacuo to afford the crude product, which was then purified by silica gel flash chromatography to give the desired product **13** (39.7 mg, 78% yield). <sup>1</sup>H NMR (400 MHz, CDCl<sub>3</sub>) δ 7.68 – 7.35 (m, 3H), 7.25 – 7.12 (m, 5H), 5.75 (br s, 1H), 5.01 (d, *J* = 5.6 Hz, 1H), 4.59 (d, *J* = 4.7 Hz, 1H), 3.92 (dd, *J* = 36.2, 14.4 Hz, 4H), 3.70 (s, 3H), 3.12 (dd, *J* = 13.3, 4.6 Hz, 1H), 2.97 (dd, *J* = 13.4, 7.6 Hz, 1H), 1.70 – 1.51 (m, 3H), 1.45 (s, 9H), 0.89 (d, *J* = 4.3 Hz, 6H). <sup>13</sup>C NMR (100 MHz, CDCl<sub>3</sub>) δ 173.01, 171.05, 169.76, 168.49, 156.12, 136.40, 129.38, 128.32, 126.77, 79.85, 54.15, 52.19, 50.80, 43.77, 42.94, 40.89, 38.88, 28.33, 24.76, 22.69, 21.83.

**Boc-L-Tyr(Bzl)-Gly-Gly-L-Phe-L-Leu-OMe (15)**: Boc-L-Tyr(Bzl)-OH (45.0mg, 0.12 mmol), H-Gly-Gly-L-Phe-L-Leu-OMe •TFA (**14**, 50.3mg, 0.1 mmol) and DABCO (22.4 mg, 0.2 mmol) were placed in a 10 ml two-neck round bottom flask, and DCE (3 ml) was added in argon atmosphere. After 5 min, NIS (67.5 mg, 0.3 mmol) and **3b** (65.8 mg, 0.24 mmol) were added in sequence at rt.

The resulting mixture was stirred at room temperature and monitored by TLC. After amine was fully consumed, the reaction was quenched with 5% sodium thiosulfate solution (5 mL) and extracted with DCM (6 mL x 3). The combined organic layer was washed with brine, dried over anhydrous MgSO<sub>4</sub>, and concentrated in vacuo to afford the crude product, which was then purified by silica gel flash chromatography to give the desired product **15** (72.5 mg, 96% yield). m.p.: 148-150 °C. <sup>1</sup>H NMR (400 MHz, DMSO-*d*<sub>6</sub>) δ 8.39 (d, *J* = 7.6 Hz, 1H), 8.18 (t, *J* = 5.4 Hz, 1H), 8.07 (d, *J* = 8.3 Hz, 1H), 7.98 (d, *J* = 5.4 Hz, 1H), 7.45 – 7.23 (m, 8H), 7.17 (t, *J* = 10.2 Hz, 3H), 6.94 – 6.89 (m, 2H), 5.05 (s, 2H), 4.62 – 4.50 (m, 1H), 4.28 (dd, *J* = 12.8, 9.5 Hz, 1H), 4.18 – 4.05 (m, 1H), 3.82 – 3.53 (m, 6H), 3.02 (dd, *J* = 13.9, 4.1 Hz, 1H), 2.93 (dd, *J* = 13.8, 3.8 Hz, 1H), 2.80 – 2.61 (m, 2H), 1.67 – 1.41 (m, 3H), 1.35 – 1.16 (m, 10H), 0.87 (dd, *J* = 21.9, 6.3 Hz, 6H). <sup>13</sup>C NMR (100 MHz, DMSO-*d*<sub>6</sub>) δ 172.75, 172.14, 171.24, 168.98, 168.31, 156.88, 155.35, 137.70, 137.26, 130.34, 130.21, 129.21, 128.41, 128.04, 127.75, 127.62, 126.28, 114.34, 78.09, 69.12, 55.97, 53.55, 51.86, 50.35, 42.09, 41.72, 37.62, 36.49, 28.15, 24.20, 22.75, 21.34. IR(KBr): 3468, 3415, 1637, 1615, 1581, 1414, 1021, 749, 640 cm<sup>-1</sup>. HRMS (ESI): *m/z* Calcd. For C<sub>41</sub>H<sub>53</sub>N<sub>5</sub>O<sub>9</sub> [M+Na]<sup>+</sup>: 782.37410, Found: 782.37400.

## 7 The gram-scale synthesis of **7ab**

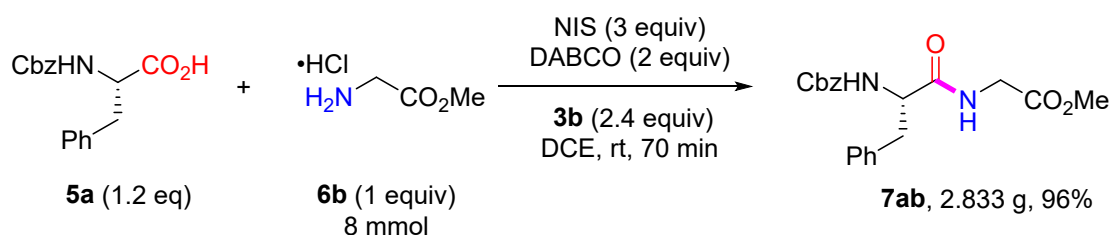

**Cbz-L-Phe-Gly-OMe (7ab)**: Cbz-L-Phe-OH (2.873g, 9.6 mmol), H-Gly-OMe·HCl (1.004 g, 8 mmol) and DABCO (1.794 g, 16 mmol) were placed in a 100 ml two-neck round bottom flask, and DCE (35 ml) was added in argon atmosphere. After 5 min, NIS (5.399 g, 24 mmol) and **3b** (6.578 g, 24 mmol) were added in sequence at rt. The resulting mixture was stirred at room temperature and monitored by TLC. After 70 min, the reaction was quenched with 5% sodium thiosulfate solution (20 mL) and extracted with DCM (30 mL x 3). The combined organic layer was washed with brine, dried over anhydrous MgSO<sub>4</sub>, and concentrated in vacuo to afford the crude product, which was then purified by silica gel flash chromatography to give the desired product **7ab** (2.833 g, 96% yield).

## 8 Experimental mechanism studies

### 8.1 Synthesis of intermediate XB-I

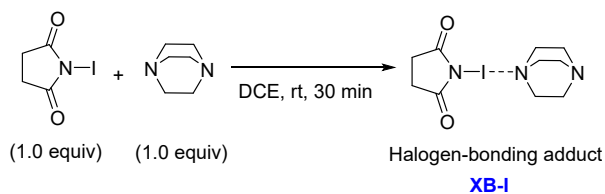

DABCO (22.4 mg, 0.2 mmol) was placed in a 10ml two-neck round bottom flask, and DCE (3ml) was added in argon atmosphere. After 10 min, NIS (67.5 mg, 0.2 mmol) was added at rt. The resulting mixture was stirred at room temperature for 20 min and the precipitated solid was filtered, which was washed with ether to give intermediate I.  $^{13}\text{C}$  NMR (100 MHz,  $\text{CDCl}_3$ ) was recorded subsequently (Figures S1).

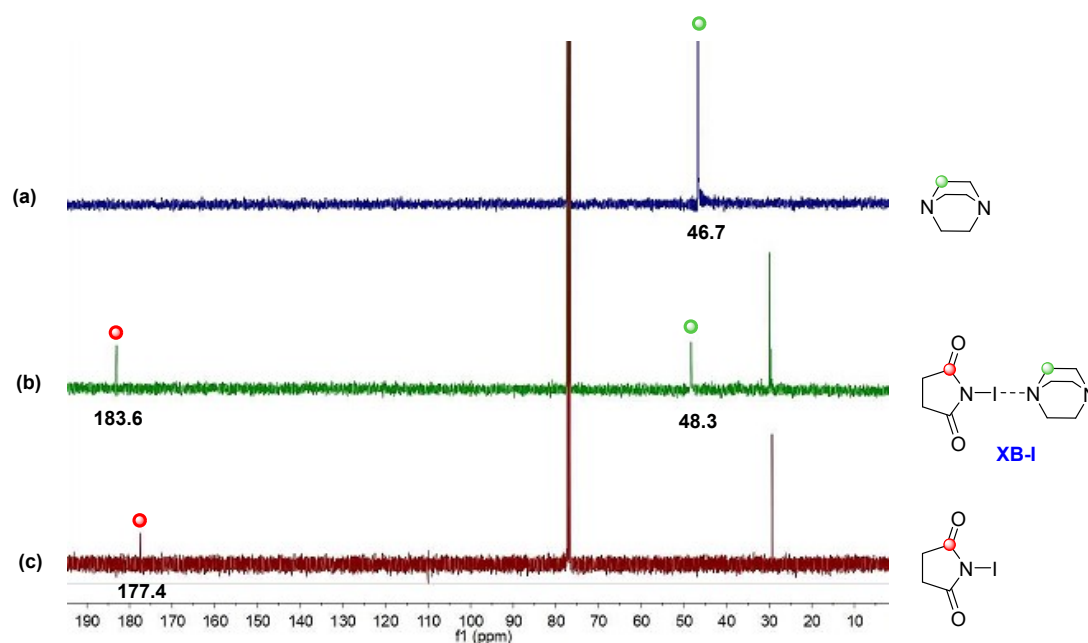

Figure S1.  $^{13}\text{C}$  NMR spectra of (a) DABCO, (b) intermediate I and (c) NIS

## 8.2 $^{13}\text{C}$ NMR analysis

Analysis of complex I showed that the signal of NIS carbonyl carbon moved down 6.2 ppm from 177.4 ppm to 183.6 ppm and the signal of DABCO carbon atom down 1.6 ppm from 46.7 ppm to 48.3 ppm.

## 8.3 Detection of $\text{I}_2$

1) preparation of 0.5% aqueous starch solution: placed 0.5g of soluble starch in a 10ml round bottom flask, followed by 5ml of cold water and stirred well. Added slowly dropwise to 100ml of  $100^\circ\text{C}$  water, continued to heat for 5 minutes, cooled to room temperature and set aside.

2) Taking 3 ml of ready-made aqueous starch solution in a 10 ml glass vial, subsequently added a drop of reaction solution to it and shaken well. We could observe that the aqueous starch solution turned blue, which was consistent with the color of  $\text{I}_2$  in the aqueous starch solution. Thus, it was proved that our reaction system generated  $\text{I}_2$  (Figure S2).

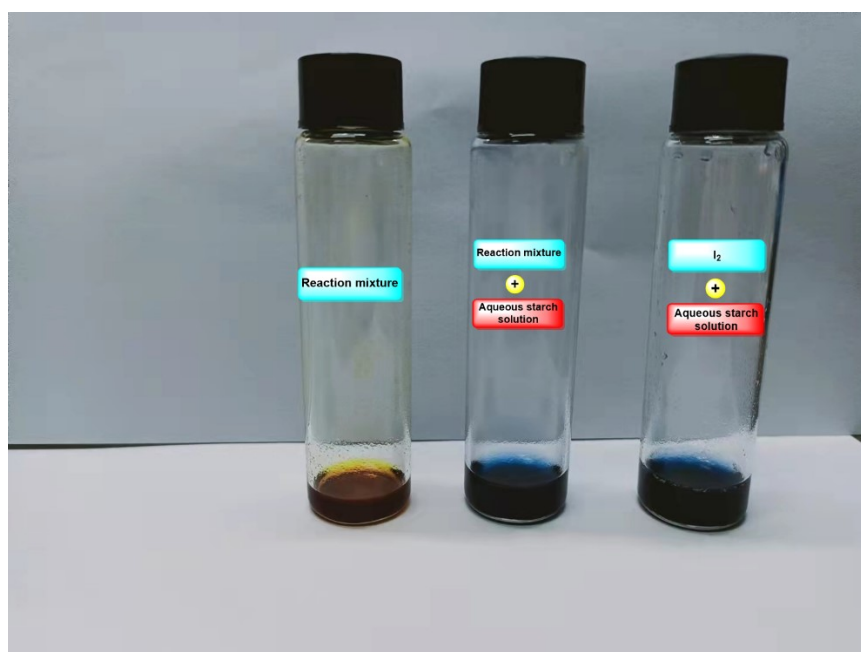

Figure S2. Color comparison of reaction mixture and  $\text{I}_2$  in aqueous starch solution

## 8.4 Synthesis of intermediate IM5a

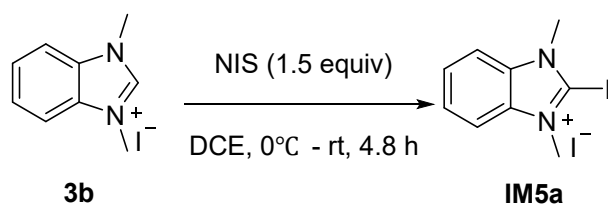

**3b** (66.0 mg, 0.24 mmol) was placed in a 10 ml two-neck round bottom flask, and DCE (3ml) was added in an ice bath argon atmosphere. After 30 min, NIS (81.0 mg, 0.36 mmol) was added. After



15 min, the resulting mixture returned to room temperature and stirred at room temperature for 4 h and the precipitated solid was filtered, which was washed with EtOAc to give intermediate **IM5a**. m.p.: 210-212 °C. <sup>1</sup>H NMR (400 MHz, DMSO-*d*<sub>6</sub>) δ 8.05 (dd, *J* = 6.2, 3.1 Hz, 2H), 7.62 (dd, *J* = 6.2, 3.1 Hz, 2H), 4.08 (s, 6H). <sup>13</sup>C NMR (100 MHz, DMSO-*d*<sub>6</sub>) δ 133.27, 126.16, 118.68, 113.23, 36.11. IR(KBr): 3550.19, 3473.39, 3415.11, 3237.39, 1638.30, 1616.26, 1578.73, 1416.00, 748.59, 622.36 cm<sup>-1</sup>. HRMS (ESI): *m/z* Calcd. For C<sub>41</sub>H<sub>53</sub>N<sub>5</sub>O<sub>9</sub> [M]<sup>+</sup>: 272.98832, Found: 272.98810.

## 8.5 Screening of base equivalents

**Table S1.** Screening of base equivalents for synthesizing dipeptides

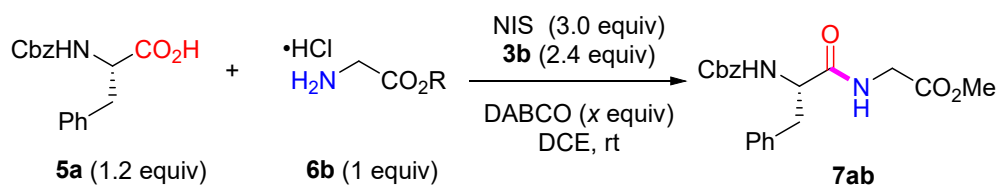

| Entry | Base<br>( <i>x</i> equiv) | NHC precursor<br>( <b>3b</b> ) | Solvent | Time<br>(h) | Yield <sup>[a]</sup><br>[%] |
|-------|---------------------------|--------------------------------|---------|-------------|-----------------------------|
| 1     | DABCO (2 equiv)           | 2.4 equiv                      | DCE     | 1.2         | 99                          |
| 2     | DABCO (1.5 equiv)         | 2.4 equiv                      | DCE     | 7.5         | 93                          |
| 3     | DABCO (1 equiv)           | 2.4 equiv                      | DCE     | 7.5         | 93                          |
| 4     | DABCO (0.5 equiv)         | 2.4 equiv                      | DCE     | 7.5         | 86                          |
| 5     | DABCO (0.3 equiv)         | 2.4 equiv                      | DCE     | 7.5         | 82                          |
| 6     | -                         | 2.4 equiv                      | DCE     | 7.5         | 78                          |

When we found that Intermediate **IM5a** could be synthesized even under base-free room temperature conditions, we screened for base equivalents (Table S1). It was observed from the Table S1 that the reaction yield dropped when decreasing the base equivalents, and the reaction time was greatly prolonged. Therefore, we concluded that the optimal reaction conditions for a 2 equivalents amount of DABCO.

## 8.6 Synthesis of 4aa by intermediate IM5a

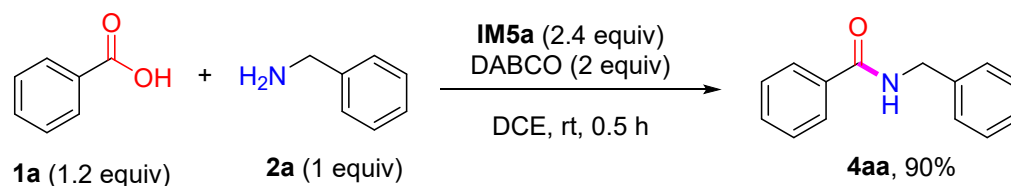

Benzoic acid (14.66 mg, 0.12 mmol), benzylamine (10.72 mg, 0.1 mmol) and DABCO (23 mg, 0.2 mmol) were placed in a 10ml two-neck round bottom flask, and DCE (3ml) was added in argon atmosphere. After 5 min, **IM5a** (96 mg, 0.24 mmol) was added at rt. The resulting mixture was stirred at room temperature and monitored by TLC. After amine was fully consumed, the reaction was quenched with 5% sodium thiosulfate solution (5 mL) and extracted with DCM (6 mL x 3). The combined organic layer was washed with brine, dried over anhydrous  $\text{MgSO}_4$ , and concentrated in vacuo to afford the crude product, which was then purified by silica gel flash chromatography to give the pure amide product **4aa** (19 mg, 90% yield).

## 9 Optimization of the reaction conditions

We began our work by constructing the peptide bond between Cbz-L-Phe-OH and H-Gly-OMe•HCl to yield **7ab** employing  $\text{K}_2\text{S}_2\text{O}_8$ -**3b**-DABCO as coupling system (Table S2). We first probed the reaction solvent and found that DCM was more effective than other solvents, with a yield of 64% for **7ab** (entries 1-9). Then, we investigated the effect of various bases on the reaction (entries 10–14). Inorganic bases, the likes of  $\text{K}_2\text{CO}_3$  and  $\text{Cs}_2\text{CO}_3$ , did not react well, probably due to poor solubility (entries 13-14). It was observed that organic bases gave better results than inorganic bases (entries 10–12). When increasing the equivalent of DABCO to 7 equivalents, the **7ab** was obtained in good yield (entry 15), whereas, the reaction effect did not improve when the equivalents were continued to be increased (entry 16). We subsequently examined the equivalence of carbene precursor **3b**, and found that the desired product was obtained in 84% yield when the carbene precursor was 4 equivalents (entry 18).

**Table S2.** Optimization of the reaction conditions of peptide synthesis

Reaction scheme showing the synthesis of **7ab** from **5a** and **6b**. **5a** (1.2 equiv) reacts with **6b** (equiv) in the presence of  $\text{K}_2\text{S}_2\text{O}_8$  (3 equiv), **DABCO** ( $x$  equiv), **3b** ( $y$  equiv), and Solvent (3 ml), rt to yield **7ab**.

| Entry | NHC precursor<br><b>3b</b> ( $y$ equiv) | Base<br>( $x$ equiv) | Solvent | Time<br>(h) | Yield<br><sup>a</sup> (%) |
|-------|-----------------------------------------|----------------------|---------|-------------|---------------------------|
| 1     | 2.4                                     | DABCO (6)            | DCE     | 12          | 59                        |
| 2     | 2.4                                     | DABCO (6)            | DCM     | 12          | 64                        |

|    |     |                                     |                   |      |       |
|----|-----|-------------------------------------|-------------------|------|-------|
| 3  | 2.4 | DABCO (6)                           | PhF               | 14.5 | 26    |
| 4  | 2.4 | DABCO (6)                           | CHCl <sub>3</sub> | 14   | 37    |
| 5  | 2.4 | DABCO (6)                           | MeOH              | 14   | trace |
| 6  | 2.4 | DABCO (6)                           | MeNO <sub>2</sub> | 12   | trace |
| 7  | 2.4 | DABCO (6)                           | PhNO <sub>2</sub> | 12   | 50    |
| 8  | 2.4 | DABCO (6)                           | 1,4-Dioxane       | 14   | 42    |
| 9  | 2.4 | DABCO (6)                           | THF               | 12   | trace |
| 10 | 2.4 | DMAP (6)                            | DCM               | 14   | 50    |
| 11 | 2.4 | NMM (6)                             | DCM               | 12   | 62    |
| 12 | 2.4 | Et <sub>3</sub> N (6)               | DCM               | 12   | 41    |
| 13 | 2.4 | K <sub>2</sub> CO <sub>3</sub> (6)  | DCM               | 13   | 34    |
| 14 | 2.4 | Cs <sub>2</sub> CO <sub>3</sub> (6) | DCM               | 14   | trace |
| 15 | 2.4 | DABCO (7)                           | DCM               | 11   | 74%   |
| 16 | 2.4 | DABCO (8)                           | DCM               | 9    | 73%   |
| 17 | 3.0 | DABCO (7)                           | DCM               | 11   | 73%   |
| 18 | 4.0 | DABCO (7)                           | DCM               | 7    | 84%   |

Reaction conditions: **5a** (0.12 mmol, 1.2 equiv), **6b** (0.10 mmol, 1.0 equiv), K<sub>2</sub>S<sub>2</sub>O<sub>8</sub> (0.3mmol, 3.0 equiv), DABCO (x equiv), **3b** (y equiv), DCM (3.0 mL). <sup>a</sup>Isolated yield.

## 10 General Procedure for the preparation of dipeptides

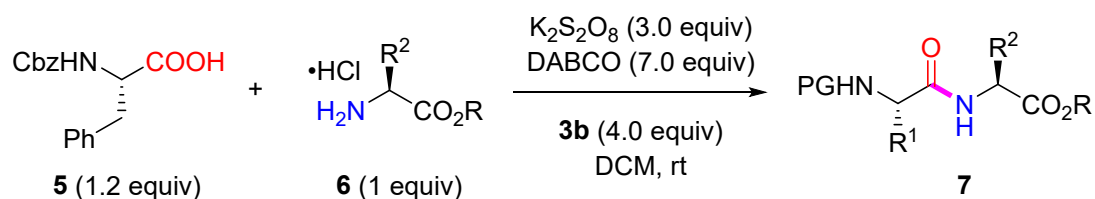

Amino acids **5** (0.12 mmol), amino acids **6** (0.1 mmol) and DABCO (78.5 mg, 0.7 mmol) were placed in a 10 ml two-neck round bottom flask, and DCE (3 ml) was added in argon atmosphere. After 5 min, K<sub>2</sub>S<sub>2</sub>O<sub>8</sub> (81.1 mg, 0.3 mmol) and **3b** (109.6 mg, 0.4) were added in sequence at rt. The resulting mixture was stirred at room temperature and monitored by TLC. After amine was fully consumed, the reaction was quenched with 5% sodium thiosulfate solution (5 mL) and extracted with DCM (6 mL x 3). The combined organic layer was washed with brine, dried over anhydrous MgSO<sub>4</sub>, and concentrated in vacuo to afford the crude product, which was then purified by silica gel flash chromatography to give the pure dipeptides product **7**.

## 11 Computational details of the mechanism

Quantum chemical calculations were performed using the Gaussian 09 suite of programs.<sup>21</sup> Geometry optimizations and frequencies were calculated with the M06-2X density functional and a mixed basis set of SDD for I and 6-31G(d) for other atoms in conjunction with the SMD implicit solvation model to account for the solvation effects of dichloroethane and dichloromethane. The recently corrected radius for iodine was used for SMD calculations (the radius of iodine was set to 2.74 Å using the `modifysph` command).<sup>22</sup> Optimized geometries were verified by frequency computations as minima (zero imaginary frequencies) or transition structures (a single imaginary frequency) at the same level of theory. Intrinsic reaction coordinate (IRC) calculations were used to confirm the connectivity between transition structure and intermediates. More accurate electronic energies were obtained by single point energy calculations at the SMD-M06-2X/6-311+G(d,p)+Def2-TZVP(I) level of theory. A factor of  $RT\ln(24.46)$  was added to free energy for each species to account for the 1 atm to 1 M standard state change. All Gibbs energies in solution reported throughout the text are in kilocalories per mole, and the bond lengths are in angstroms. The structures were generated by CYL view.<sup>23</sup>

### Calculated cartesian coordinates

#### 11.1 NIS-3a-DABCO system

##### XB-I (DABCO-NIS)

|   |             |             |             |
|---|-------------|-------------|-------------|
| C | 2.53382900  | 1.34936500  | -0.35075400 |
| C | 4.08779200  | 1.32615600  | -0.36811400 |
| H | 2.11778700  | 1.61454800  | -1.32700300 |
| H | 2.14300100  | 2.05159000  | 0.39132400  |
| H | 4.46708400  | 1.57167100  | -1.36432500 |
| H | 4.49272400  | 2.05603200  | 0.33888700  |
| C | 2.53185400  | -0.97797400 | -0.99179200 |
| H | 2.11422100  | -1.95547300 | -0.73417400 |
| H | 2.14127900  | -0.68447700 | -1.97032800 |
| C | 4.08577400  | -0.98386300 | -0.96445500 |
| H | 4.46362700  | -1.96962600 | -0.67825400 |
| H | 4.49018400  | -0.73801900 | -1.95058800 |
| C | 4.08710200  | -0.34560800 | 1.33368100  |
| H | 4.49034000  | -1.32352200 | 1.61238500  |
| H | 4.46748800  | 0.39375800  | 2.04449700  |
| C | 2.53311100  | -0.36979700 | 1.34443000  |
| H | 2.14073500  | -1.36319300 | 1.58049000  |
| H | 2.11837300  | 0.34340900  | 2.06257600  |
| N | 4.58862100  | -0.00132400 | 0.00012000  |
| N | 2.03261600  | 0.00102200  | 0.00090500  |
| I | -0.41476900 | 0.00095100  | -0.00099900 |
| C | -4.80855000 | -0.76536900 | 0.00175400  |

|                                          |                |             |                             |
|------------------------------------------|----------------|-------------|-----------------------------|
| C                                        | -4.80943500    | 0.76259000  | 0.00211400                  |
| H                                        | -5.28162500    | -1.20175700 | 0.88502100                  |
| H                                        | -5.28362700    | -1.20131500 | -0.88065600                 |
| H                                        | -5.28270400    | 1.19795600  | 0.88578600                  |
| H                                        | -5.28533000    | 1.19845700  | -0.87988700                 |
| N                                        | -2.57364500    | -0.00008400 | -0.00115900                 |
| C                                        | -3.33463500    | -1.15286100 | 0.00000000                  |
| C                                        | -3.33596600    | 1.15180100  | 0.00015300                  |
| O                                        | -2.89174900    | -2.28254100 | -0.00034000                 |
| O                                        | -2.89439800    | 2.28199300  | -0.00015600                 |
| Zero-point correction=                   |                |             | 0.256843 (Hartree/Particle) |
| Thermal correction to Energy=            |                |             | 0.272827                    |
| Thermal correction to Enthalpy=          |                |             | 0.273771                    |
| Thermal correction to Gibbs Free Energy= |                |             | 0.209458                    |
| SCF Done: E(RM062X) =                    | -1002.96273998 |             |                             |

### NIS

|                                          |                |             |                             |
|------------------------------------------|----------------|-------------|-----------------------------|
| C                                        | 2.76946100     | -0.76590000 | 0.00036700                  |
| C                                        | 2.76946200     | 0.76589700  | -0.00029000                 |
| H                                        | 3.24547700     | -1.19825100 | -0.88286400                 |
| H                                        | 3.24469900     | -1.19737700 | 0.88445900                  |
| H                                        | 3.24476800     | 1.19737600  | -0.88434200                 |
| H                                        | 3.24540900     | 1.19824300  | 0.88298200                  |
| N                                        | 0.55475700     | 0.00000200  | -0.00000500                 |
| I                                        | -1.49669900    | 0.00000000  | -0.00000600                 |
| C                                        | 1.30844700     | -1.17609400 | 0.00004600                  |
| C                                        | 1.30844600     | 1.17609200  | -0.00008400                 |
| O                                        | 0.84540500     | -2.28863100 | -0.00000200                 |
| O                                        | 0.84541100     | 2.28863300  | -0.00001300                 |
| Zero-point correction=                   |                |             | 0.077951 (Hartree/Particle) |
| Thermal correction to Energy=            |                |             | 0.085618                    |
| Thermal correction to Enthalpy=          |                |             | 0.086562                    |
| Thermal correction to Gibbs Free Energy= |                |             | 0.043353                    |
| SCF Done: E(RM062X) =                    | -657.650151870 |             |                             |

### DABCO

|   |             |             |             |
|---|-------------|-------------|-------------|
| C | 0.77793200  | -1.37555600 | -0.08891500 |
| C | -0.77820800 | -1.37544600 | -0.08822600 |
| H | 1.17503100  | -1.82634400 | -1.00476300 |
| H | 1.17563000  | -1.93957200 | 0.76149300  |
| H | -1.17618900 | -1.82698500 | -1.00332000 |
| H | -1.17522600 | -1.93865700 | 0.76303200  |
| C | 0.77807600  | 0.76464800  | -1.14666700 |

|                                          |                |             |                             |
|------------------------------------------|----------------|-------------|-----------------------------|
| H                                        | 1.17526600     | 1.78304700  | -1.07851300                 |
| H                                        | 1.17560300     | 0.31032500  | -2.06046200                 |
| C                                        | -0.77796700    | 0.76424200  | -1.14701100                 |
| H                                        | -1.17572600    | 1.78249300  | -1.07996400                 |
| H                                        | -1.17484000    | 0.30887800  | -2.06057200                 |
| C                                        | -0.77794100    | 0.61143300  | 1.23523700                  |
| H                                        | -1.17484500    | 1.63036000  | 1.29714800                  |
| H                                        | -1.17601900    | 0.04452400  | 2.08367800                  |
| C                                        | 0.77810800     | 0.61068900  | 1.23549900                  |
| H                                        | 1.17596600     | 1.62918000  | 1.29844900                  |
| H                                        | 1.17535100     | 0.04264600  | 2.08357500                  |
| N                                        | -1.28709800    | 0.00013000  | 0.00007600                  |
| N                                        | 1.28709800     | -0.00012300 | 0.00002700                  |
| Zero-point correction=                   |                |             | 0.176565 (Hartree/Particle) |
| Thermal correction to Energy=            |                |             | 0.183185                    |
| Thermal correction to Enthalpy=          |                |             | 0.184129                    |
| Thermal correction to Gibbs Free Energy= |                |             | 0.145574                    |
| SCF Done: E(RM062X) =                    | -345.281590045 |             |                             |

### NHC precursor (3b)

|   |             |             |             |
|---|-------------|-------------|-------------|
| C | 0.01139200  | 2.52448800  | 0.69955300  |
| C | 0.01139200  | 2.52448800  | -0.69955300 |
| C | -0.04208500 | 3.70751000  | -1.43654600 |
| C | -0.09462200 | 4.88401100  | -0.70494100 |
| C | -0.09462200 | 4.88401100  | 0.70494100  |
| C | -0.04208500 | 3.70751000  | 1.43654600  |
| H | -0.04153500 | 3.70171300  | -2.52120500 |
| H | -0.13711200 | 5.83189900  | -1.23064800 |
| H | -0.13711200 | 5.83189900  | 1.23064800  |
| H | -0.04153500 | 3.70171300  | 2.52120500  |
| N | 0.07369300  | 1.19378100  | -1.09242400 |
| N | 0.07369300  | 1.19378100  | 1.09242400  |
| C | 0.09985500  | 0.71189400  | -2.46817100 |
| H | 0.12559100  | -0.37739400 | -2.44988700 |
| H | -0.79890300 | 1.05235900  | -2.98482700 |
| C | 0.09985500  | 0.71189400  | 2.46817100  |
| H | -0.79890300 | 1.05235900  | 2.98482700  |
| H | 0.12559100  | -0.37739400 | 2.44988700  |
| C | 0.11142900  | 0.43602800  | 0.00000000  |
| H | 0.98971900  | 1.09751700  | 2.96829700  |
| H | 0.98971900  | 1.09751700  | -2.96829700 |
| H | 0.15430600  | -0.65163100 | 0.00000000  |
| I | -0.03442600 | -3.45706600 | 0.00000000  |

|                                          |                             |
|------------------------------------------|-----------------------------|
| Zero-point correction=                   | 0.180855 (Hartree/Particle) |
| Thermal correction to Energy=            | 0.192184                    |
| Thermal correction to Enthalpy=          | 0.193128                    |
| Thermal correction to Gibbs Free Energy= | 0.140944                    |
| SCF Done: E(RM062X) =                    | -756.699240474              |

**IM1a**

|                        |                             |             |             |
|------------------------|-----------------------------|-------------|-------------|
| I                      | 1.32941900                  | 0.63408400  | -0.26346800 |
| C                      | -2.76889100                 | 1.75470500  | -1.48677100 |
| C                      | -2.66806700                 | 2.52153900  | -0.16826000 |
| H                      | -3.59977000                 | 1.04412100  | -1.51319300 |
| H                      | -2.85482300                 | 2.40382000  | -2.36191200 |
| H                      | -3.45853600                 | 2.27231300  | 0.54456200  |
| H                      | -2.66629200                 | 3.60693400  | -0.29962600 |
| N                      | -0.69241700                 | 1.27329500  | -0.47991600 |
| C                      | -1.46439000                 | 0.97999500  | -1.59421500 |
| C                      | -1.32370900                 | 2.11996100  | 0.41946800  |
| O                      | -1.13972000                 | 0.22013900  | -2.48163300 |
| O                      | -0.86570300                 | 2.46543700  | 1.48706700  |
| I                      | 4.40369200                  | -0.45725900 | 0.11228100  |
| H                      | -0.16418600                 | -1.49798900 | 1.83774000  |
| C                      | -1.11961100                 | -1.37344500 | 1.34632300  |
| N                      | -1.42727000                 | -1.86370700 | 0.14811600  |
| N                      | -2.15294800                 | -0.71222900 | 1.86242700  |
| C                      | -2.74397400                 | -1.52342800 | -0.13384800 |
| C                      | -0.53999800                 | -2.59987300 | -0.74781600 |
| C                      | -3.20807000                 | -0.78673700 | 0.96118200  |
| C                      | -2.18886500                 | -0.04116300 | 3.15801200  |
| C                      | -3.55665700                 | -1.80484900 | -1.23344400 |
| H                      | 0.40925700                  | -2.77087300 | -0.24016400 |
| H                      | -1.00395900                 | -3.55541600 | -0.99831600 |
| H                      | -0.38145600                 | -2.00185700 | -1.64828900 |
| C                      | -4.51459400                 | -0.29737400 | 1.01979500  |
| H                      | -2.95495500                 | -0.50606600 | 3.78068000  |
| H                      | -1.21148700                 | -0.14535700 | 3.62811600  |
| H                      | -2.40882600                 | 1.01692900  | 3.00659900  |
| C                      | -4.85556300                 | -1.32506200 | -1.17304200 |
| H                      | -3.18734000                 | -2.36697800 | -2.08410600 |
| C                      | -5.32555500                 | -0.58352400 | -0.06760000 |
| H                      | -4.87186900                 | 0.26857200  | 1.87353700  |
| H                      | -5.53020000                 | -1.52062800 | -1.99962100 |
| H                      | -6.35095700                 | -0.22984400 | -0.06966400 |
| Zero-point correction= | 0.259875 (Hartree/Particle) |             |             |

|                                          |                |
|------------------------------------------|----------------|
| Thermal correction to Energy=            | 0.281386       |
| Thermal correction to Enthalpy=          | 0.282330       |
| Thermal correction to Gibbs Free Energy= | 0.204704       |
| SCF Done: E(RM062X) =                    | -1414.37592470 |

**TS1a**

|                               |             |             |                             |
|-------------------------------|-------------|-------------|-----------------------------|
| I                             | 1.68432200  | -0.63670400 | 0.01781100                  |
| C                             | -3.17478300 | -2.01543400 | 1.27268800                  |
| C                             | -2.54183900 | -2.68298500 | 0.05613000                  |
| H                             | -4.10857800 | -1.49178000 | 1.04768400                  |
| H                             | -3.37104600 | -2.70240800 | 2.10058000                  |
| H                             | -3.11277200 | -2.55383500 | -0.86783500                 |
| H                             | -2.35281000 | -3.75245700 | 0.18381200                  |
| N                             | -1.02579900 | -1.02570400 | 0.88511300                  |
| C                             | -2.12204400 | -0.98675100 | 1.70935600                  |
| C                             | -1.20416200 | -1.95772000 | -0.06569400                 |
| O                             | -2.27471200 | -0.23458000 | 2.66386000                  |
| O                             | -0.36407200 | -2.21055100 | -0.94175700                 |
| I                             | 4.40448600  | 0.47205300  | 0.02404600                  |
| H                             | -0.10012900 | 2.18552100  | -0.35878400                 |
| C                             | -1.11359000 | 1.81576800  | -0.42854300                 |
| N                             | -2.05711800 | 2.03291800  | 0.48087500                  |
| N                             | -1.58703800 | 1.08733500  | -1.43586700                 |
| C                             | -3.21904700 | 1.40616000  | 0.05571200                  |
| C                             | -1.89382200 | 2.74505300  | 1.74242900                  |
| C                             | -2.91609600 | 0.79276000  | -1.16482400                 |
| C                             | -0.83396600 | 0.62426700  | -2.59640400                 |
| C                             | -4.48885200 | 1.32772000  | 0.62734800                  |
| H                             | -0.88235900 | 3.14839100  | 1.78065300                  |
| H                             | -2.61952000 | 3.55869000  | 1.79132000                  |
| H                             | -2.04529900 | 2.03268300  | 2.55466200                  |
| C                             | -3.86802800 | 0.06015000  | -1.87573600                 |
| H                             | -1.39974700 | 0.85933900  | -3.49957000                 |
| H                             | 0.12249900  | 1.14643400  | -2.61888100                 |
| H                             | -0.67046300 | -0.45252700 | -2.51083500                 |
| C                             | -5.43815900 | 0.60943300  | -0.08322700                 |
| H                             | -4.71167800 | 1.79810900  | 1.57865000                  |
| C                             | -5.13189800 | -0.01722400 | -1.30982000                 |
| H                             | -3.62715000 | -0.42137400 | -2.81756600                 |
| H                             | -6.44230400 | 0.51848600  | 0.31715600                  |
| H                             | -5.90783600 | -0.57476000 | -1.82363900                 |
| Zero-point correction=        |             |             | 0.258966 (Hartree/Particle) |
| Thermal correction to Energy= |             |             | 0.279901                    |



Thermal correction to Enthalpy= 0.280845  
 Thermal correction to Gibbs Free Energy= 0.204794  
 SCF Done: E(RM062X) = -1414.34799181

**I<sub>2</sub>**

I 0.00000000 0.00000000 1.40961100  
 I 0.00000000 0.00000000 -1.40961100  
 Zero-point correction= 0.000424 (Hartree/Particle)  
 Thermal correction to Energy= 0.003367  
 Thermal correction to Enthalpy= 0.004312  
 Thermal correction to Gibbs Free Energy= -0.025490  
 SCF Done: E(RM062X) = -595.271049000

**XB-II (DABCO-I<sub>2</sub>)**

C -4.01068300 -1.34968400 0.26096900  
 C -2.46004900 -1.39337700 0.15943800  
 H -4.33570500 -1.64803200 1.26128500  
 H -4.45300400 -2.03828100 -0.46339200  
 H -2.00105700 -1.81275300 1.05735500  
 H -2.11872200 -1.96205200 -0.70891400  
 C -4.01096200 0.90270000 1.03686400  
 H -4.33545900 1.91816100 0.79467100  
 H -4.45475700 0.62017800 1.99493400  
 C -2.46030600 0.83611800 1.12701600  
 H -2.00153500 1.82363300 1.04138300  
 H -2.12006100 0.36792200 2.05395100  
 C -2.45824400 0.56004700 -1.28639600  
 H -2.11748000 1.59676300 -1.34303700  
 H -1.99725800 -0.00627900 -2.09858400  
 C -4.00887600 0.44821900 -1.30181700  
 H -4.45240700 1.41899200 -1.53772400  
 H -4.33197400 -0.27057400 -2.05963000  
 N -1.96017200 0.00056500 0.00046200  
 N -4.51065500 0.00063600 -0.00170900  
 I 0.35685100 -0.00150900 0.00161200  
 I 3.42560000 0.00075000 -0.00085700  
 Zero-point correction= 0.179324 (Hartree/Particle)  
 Thermal correction to Energy= 0.190231  
 Thermal correction to Enthalpy= 0.191176  
 Thermal correction to Gibbs Free Energy= 0.138180  
 SCF Done: E(RM062X) = -940.584800001

**IM2a**

|                                          |                |             |                             |
|------------------------------------------|----------------|-------------|-----------------------------|
| C                                        | -2.52209400    | 0.70059500  | 0.00001600                  |
| C                                        | -2.52206200    | -0.70060600 | -0.00001900                 |
| C                                        | -3.70707100    | -1.43545800 | 0.00000200                  |
| C                                        | -4.88612900    | -0.70452800 | 0.00006500                  |
| C                                        | -4.88616100    | 0.70441000  | 0.00010200                  |
| C                                        | -3.70713600    | 1.43539300  | 0.00007900                  |
| H                                        | -3.70138800    | -2.52039100 | -0.00002900                 |
| H                                        | -5.83478800    | -1.23098200 | 0.00008400                  |
| H                                        | -5.83484400    | 1.23082100  | 0.00015000                  |
| H                                        | -3.70150100    | 2.52032700  | 0.00010700                  |
| N                                        | -1.18859900    | -1.09093400 | -0.00008200                 |
| N                                        | -1.18864900    | 1.09098500  | -0.00002500                 |
| C                                        | -0.67674000    | -2.45706600 | -0.00014900                 |
| H                                        | 0.41640500     | -2.41321000 | -0.00021400                 |
| H                                        | -1.03007600    | -2.97519800 | 0.89334300                  |
| C                                        | -0.67685300    | 2.45714000  | 0.00000600                  |
| H                                        | -1.03025700    | 2.97520500  | 0.89351000                  |
| H                                        | 0.41629200     | 2.41333000  | -0.00000100                 |
| C                                        | -0.42706300    | 0.00004200  | -0.00008100                 |
| H                                        | -1.03027200    | 2.97525700  | -0.89346200                 |
| H                                        | -1.03017900    | -2.97514600 | -0.89363000                 |
| H                                        | 0.68229900     | 0.00005900  | -0.00012400                 |
| C                                        | 4.80315300     | -0.76229800 | 0.00026400                  |
| C                                        | 4.80312300     | 0.76234700  | -0.00000100                 |
| H                                        | 5.27616400     | -1.20468800 | -0.88131300                 |
| H                                        | 5.27598600     | -1.20438200 | 0.88209000                  |
| H                                        | 5.27610700     | 1.20444900  | -0.88173700                 |
| H                                        | 5.27595000     | 1.20475500  | 0.88166600                  |
| N                                        | 2.53090200     | -0.00001800 | -0.00009600                 |
| C                                        | 3.30728000     | -1.11468800 | 0.00016800                  |
| C                                        | 3.30723700     | 1.11467800  | -0.00019200                 |
| O                                        | 2.89014400     | -2.27303400 | 0.00036400                  |
| O                                        | 2.89005800     | 2.27301100  | -0.00043500                 |
| Zero-point correction=                   |                |             | 0.257173 (Hartree/Particle) |
| Thermal correction to Energy=            |                |             | 0.274569                    |
| Thermal correction to Enthalpy=          |                |             | 0.275513                    |
| Thermal correction to Gibbs Free Energy= |                |             | 0.208768                    |
| SCF Done: E(RM062X) =                    | -819.061981904 |             |                             |

### TS2a

|   |             |             |             |
|---|-------------|-------------|-------------|
| C | -2.42819000 | 0.69938400  | -0.00004900 |
| C | -2.42818600 | -0.69938500 | 0.00008600  |
| C | -3.61364400 | -1.43272900 | 0.00004700  |

|                                          |                |             |                             |
|------------------------------------------|----------------|-------------|-----------------------------|
| C                                        | -4.79632500    | -0.70362900 | -0.00011900                 |
| C                                        | -4.79632800    | 0.70361500  | -0.00024600                 |
| C                                        | -3.61365100    | 1.43272100  | -0.00021000                 |
| H                                        | -3.60957700    | -2.51801800 | 0.00014700                  |
| H                                        | -5.74450200    | -1.23149700 | -0.00015400                 |
| H                                        | -5.74450800    | 1.23147800  | -0.00037100                 |
| H                                        | -3.60959100    | 2.51801000  | -0.00029900                 |
| N                                        | -1.09331200    | -1.08056100 | 0.00024100                  |
| N                                        | -1.09331600    | 1.08056600  | 0.00002500                  |
| C                                        | -0.62993900    | -2.45982800 | 0.00037800                  |
| H                                        | 0.46260800     | -2.45742300 | 0.00036200                  |
| H                                        | -0.99957700    | -2.97232700 | 0.89208300                  |
| C                                        | -0.62994700    | 2.45983500  | 0.00004700                  |
| H                                        | -0.99962300    | 2.97241300  | 0.89169200                  |
| H                                        | 0.46260000     | 2.45743200  | 0.00008600                  |
| C                                        | -0.28977200    | 0.00000400  | 0.00017700                  |
| H                                        | -0.99954800    | 2.97242300  | -0.89162300                 |
| H                                        | -0.99957700    | -2.97249400 | -0.89123200                 |
| H                                        | 1.11394200     | 0.00000600  | 0.00003800                  |
| C                                        | 4.65969800     | -0.76329500 | -0.00024700                 |
| C                                        | 4.65968800     | 0.76331400  | 0.00003800                  |
| H                                        | 5.13284800     | -1.20239600 | -0.88259800                 |
| H                                        | 5.13301000     | -1.20276500 | 0.88183100                  |
| H                                        | 5.13291700     | 1.20276600  | -0.88209400                 |
| H                                        | 5.13290600     | 1.20244700  | 0.88233400                  |
| N                                        | 2.40770500     | -0.00000600 | -0.00018900                 |
| C                                        | 3.17635800     | -1.13203900 | -0.00022100                 |
| C                                        | 3.17634300     | 1.13203600  | 0.00008200                  |
| O                                        | 2.74448400     | -2.27632400 | -0.00023400                 |
| O                                        | 2.74445300     | 2.27631600  | 0.00032000                  |
| Zero-point correction=                   |                |             | 0.252751 (Hartree/Particle) |
| Thermal correction to Energy=            |                |             | 0.269763                    |
| Thermal correction to Enthalpy=          |                |             | 0.270707                    |
| Thermal correction to Gibbs Free Energy= |                |             | 0.206277                    |
| SCF Done: E(RM062X) =                    | -819.049036204 |             |                             |

### IM3a (NHC)

|   |             |             |             |
|---|-------------|-------------|-------------|
| C | -0.16291600 | 0.69959400  | -0.00000100 |
| C | -0.16291600 | -0.69959400 | -0.00000100 |
| C | -1.34936900 | -1.42979500 | 0.00000300  |
| C | -2.53642800 | -0.70234700 | 0.00000200  |
| C | -2.53642800 | 0.70234700  | 0.00000200  |
| C | -1.34936900 | 1.42979500  | 0.00000300  |

|                                          |                |             |                             |
|------------------------------------------|----------------|-------------|-----------------------------|
| H                                        | -1.34746600    | -2.51546400 | 0.00000700                  |
| H                                        | -3.48393700    | -1.23196900 | 0.00000200                  |
| H                                        | -3.48393700    | 1.23196900  | 0.00000200                  |
| H                                        | -1.34746600    | 2.51546400  | 0.00000800                  |
| N                                        | 1.17454700     | -1.07115900 | -0.00000800                 |
| N                                        | 1.17454700     | 1.07115900  | -0.00000800                 |
| C                                        | 1.60944300     | -2.45403100 | -0.00000200                 |
| H                                        | 2.69895000     | -2.46477300 | -0.00013500                 |
| H                                        | 1.24046500     | -2.97067100 | 0.89088100                  |
| C                                        | 1.60944300     | 2.45403100  | -0.00000200                 |
| H                                        | 1.24046600     | 2.97067000  | 0.89088200                  |
| H                                        | 2.69895000     | 2.46477300  | -0.00013600                 |
| C                                        | 2.02184100     | 0.00000000  | 0.00001300                  |
| H                                        | 1.24024500     | 2.97073900  | -0.89075300                 |
| H                                        | 1.24024700     | -2.97073800 | -0.89075400                 |
| Zero-point correction=                   |                |             | 0.167364 (Hartree/Particle) |
| Thermal correction to Energy=            |                |             | 0.176980                    |
| Thermal correction to Enthalpy=          |                |             | 0.177924                    |
| Thermal correction to Gibbs Free Energy= |                |             | 0.133076                    |
| SCF Done: E(RM062X) =                    | -458.396946502 |             |                             |

#### IM4a

|   |             |             |             |
|---|-------------|-------------|-------------|
| I | -0.57571000 | -0.69139600 | -0.02879100 |
| C | -6.04026000 | 0.43282300  | 0.06522500  |
| C | -5.34584000 | -0.92116700 | 0.09537400  |
| H | -6.68405700 | 0.58032000  | -0.80636000 |
| H | -6.63869600 | 0.64352200  | 0.95602200  |
| H | -5.58373700 | -1.56410100 | -0.75692000 |
| H | -5.53339700 | -1.49811900 | 1.00562500  |
| N | -3.65297700 | 0.78057000  | -0.01185100 |
| C | -4.86694900 | 1.42512200  | -0.00084500 |
| C | -3.86614500 | -0.53618800 | 0.03941800  |
| O | -5.02406900 | 2.63761200  | -0.03821100 |
| O | -2.97947400 | -1.42234100 | 0.04476000  |
| C | 1.50739300  | -0.19853800 | -0.06763500 |
| N | 2.52402700  | -1.07238500 | -0.05200600 |
| N | 1.99962900  | 1.04854900  | -0.05914800 |
| C | 3.72211600  | -0.36992200 | -0.00653100 |
| C | 2.43265200  | -2.52735000 | -0.02416300 |
| C | 3.38759600  | 0.98607400  | -0.01173700 |
| C | 1.22455500  | 2.28547500  | -0.04605100 |
| C | 5.04732800  | -0.80327500 | 0.04410900  |
| H | 1.48355400  | -2.84041300 | -0.45646500 |

|                                          |                |             |                             |
|------------------------------------------|----------------|-------------|-----------------------------|
| H                                        | 3.24780800     | -2.93453800 | -0.62315600                 |
| H                                        | 2.50989700     | -2.88335700 | 1.00548900                  |
| C                                        | 4.36341000     | 1.98235900  | 0.03747000                  |
| H                                        | 0.31405900     | 2.15019300  | -0.62872400                 |
| H                                        | 0.97392000     | 2.55739100  | 0.98147700                  |
| H                                        | 1.82488100     | 3.07056600  | -0.50514100                 |
| C                                        | 6.01760900     | 0.18607100  | 0.08974300                  |
| H                                        | 5.30113100     | -1.85754400 | 0.05579500                  |
| C                                        | 5.68120700     | 1.55397200  | 0.08626700                  |
| H                                        | 4.10469700     | 3.03530000  | 0.04297600                  |
| H                                        | 7.06319900     | -0.09966100 | 0.13296300                  |
| H                                        | 6.47491900     | 2.29239000  | 0.12712000                  |
| Zero-point correction=                   |                |             | 0.247355 (Hartree/Particle) |
| Thermal correction to Energy=            |                |             | 0.266596                    |
| Thermal correction to Enthalpy=          |                |             | 0.267540                    |
| Thermal correction to Gibbs Free Energy= |                |             | 0.195851                    |
| SCF Done: E(RM062X) =                    | -1116.08273392 |             |                             |

#### IM5a

|                               |             |             |                             |
|-------------------------------|-------------|-------------|-----------------------------|
| C                             | 1.78554800  | -0.69927300 | -0.01189900                 |
| C                             | 1.78555000  | 0.69927000  | -0.01189900                 |
| C                             | 2.97271300  | 1.43529500  | 0.00462200                  |
| C                             | 4.14838000  | 0.70504100  | 0.01908900                  |
| C                             | 4.14837800  | -0.70504800 | 0.01908800                  |
| C                             | 2.97271100  | -1.43529900 | 0.00462000                  |
| H                             | 2.97531200  | 2.51926300  | 0.01311200                  |
| H                             | 5.09617200  | 1.23198400  | 0.03451200                  |
| H                             | 5.09616900  | -1.23199200 | 0.03451000                  |
| H                             | 2.97530800  | -2.51926800 | 0.01311000                  |
| N                             | 0.45276200  | 1.09948800  | -0.02482000                 |
| N                             | 0.45275900  | -1.09948700 | -0.02481700                 |
| C                             | -0.03091700 | 2.47900800  | -0.01194300                 |
| H                             | -0.78209100 | 2.60749800  | -0.79190500                 |
| H                             | -0.45002300 | 2.71452800  | 0.96803400                  |
| C                             | -0.03093000 | -2.47900400 | -0.01194400                 |
| H                             | -0.45010200 | -2.71450000 | 0.96801100                  |
| H                             | -0.78205400 | -2.60750400 | -0.79195200                 |
| C                             | -0.30348900 | 0.00000200  | -0.02512300                 |
| H                             | 0.81098200  | -3.13541200 | -0.22305400                 |
| H                             | 0.81098600  | 3.13540600  | -0.22312500                 |
| I                             | -2.38352800 | 0.00000100  | 0.00940600                  |
| Zero-point correction=        |             |             | 0.170405 (Hartree/Particle) |
| Thermal correction to Energy= |             |             | 0.181885                    |

Thermal correction to Enthalpy= 0.182829  
Thermal correction to Gibbs Free Energy= 0.131655  
SCF Done: E(RM062X) = -755.894520464

#### Succinimide

|   |             |             |             |
|---|-------------|-------------|-------------|
| C | -0.76592500 | -1.25505700 | 0.00035100  |
| C | 0.76592500  | -1.25505700 | -0.00028500 |
| H | -1.19946000 | -1.73274600 | -0.88163800 |
| H | -1.19860100 | -1.73200000 | 0.88318000  |
| H | 1.19860800  | -1.73207200 | -0.88307000 |
| H | 1.19945200  | -1.73267000 | 0.88174900  |
| N | 0.00000100  | 0.95928700  | -0.00001300 |
| C | -1.16596000 | 0.21093500  | 0.00004100  |
| C | 1.16595800  | 0.21093700  | -0.00009400 |
| O | -2.28344400 | 0.67304500  | 0.00002900  |
| O | 2.28344500  | 0.67304400  | -0.00005200 |
| H | -0.00000300 | 1.97522300  | -0.00001400 |

Zero-point correction= 0.088329 (Hartree/Particle)  
Thermal correction to Energy= 0.094429  
Thermal correction to Enthalpy= 0.095373  
Thermal correction to Gibbs Free Energy= 0.058033  
SCF Done: E(RM062X) = -360.648745644

#### Succinimide anion

|   |             |             |             |
|---|-------------|-------------|-------------|
| C | -0.76001400 | -1.22481400 | 0.00035300  |
| C | 0.76001400  | -1.22481500 | -0.00025200 |
| H | -1.20669700 | -1.69622200 | -0.88065900 |
| H | -1.20583900 | -1.69553000 | 0.88218100  |
| H | 1.20584100  | -1.69556000 | -0.88206300 |
| H | 1.20669400  | -1.69619200 | 0.88077800  |
| N | 0.00000000  | 1.06476600  | -0.00003100 |
| C | -1.10798100 | 0.27754400  | 0.00004500  |
| C | 1.10798100  | 0.27754500  | 0.00002800  |
| O | -2.27585600 | 0.66858600  | 0.00002800  |
| O | 2.27585600  | 0.66858600  | -0.00016100 |

Zero-point correction= 0.075941 (Hartree/Particle)  
Thermal correction to Energy= 0.081700  
Thermal correction to Enthalpy= 0.082644  
Thermal correction to Gibbs Free Energy= 0.046069  
SCF Done: E(RM062X) = -360.161263945

#### PhCO<sub>2</sub>H

|   |             |            |             |
|---|-------------|------------|-------------|
| C | -2.56208000 | 0.04189200 | -0.00005700 |
|---|-------------|------------|-------------|

|                                          |                |             |                             |
|------------------------------------------|----------------|-------------|-----------------------------|
| C                                        | -1.83716900    | 1.23283300  | -0.00008600                 |
| C                                        | -0.44583500    | 1.20204000  | 0.00005100                  |
| C                                        | 0.21782300     | -0.02760900 | 0.00021200                  |
| C                                        | -0.50884600    | -1.22077500 | 0.00019800                  |
| C                                        | -1.89829000    | -1.18517100 | -0.00002200                 |
| H                                        | -3.64769800    | 0.06963700  | -0.00012400                 |
| H                                        | -2.35587300    | 2.18630700  | -0.00037300                 |
| H                                        | 0.12409700     | 2.12490400  | -0.00024700                 |
| H                                        | 0.02728500     | -2.16440100 | 0.00013500                  |
| H                                        | -2.46453700    | -2.11118400 | 0.00001000                  |
| C                                        | 1.70291200     | -0.11756100 | 0.00012700                  |
| O                                        | 2.32673500     | -1.15559500 | -0.00030800                 |
| O                                        | 2.30309000     | 1.08267400  | 0.00002000                  |
| H                                        | 3.26704500     | 0.92421400  | 0.00036300                  |
| Zero-point correction=                   |                |             | 0.110813 (Hartree/Particle) |
| Thermal correction to Energy=            |                |             | 0.118186                    |
| Thermal correction to Enthalpy=          |                |             | 0.119130                    |
| Thermal correction to Gibbs Free Energy= |                |             | 0.078662                    |
| SCF Done: E(RM062X) =                    | -420.787251524 |             |                             |

#### Benzoate (PhCOO<sup>-</sup>)

|                                          |                |             |                             |
|------------------------------------------|----------------|-------------|-----------------------------|
| C                                        | 2.52843100     | 0.00001500  | -0.00001000                 |
| C                                        | 1.82743400     | 1.20609500  | -0.02099800                 |
| C                                        | 0.43388300     | 1.20145800  | -0.01802500                 |
| C                                        | -0.27766600    | -0.00000200 | 0.00000100                  |
| C                                        | 0.43390500     | -1.20147800 | 0.01804000                  |
| C                                        | 1.82743000     | -1.20609200 | 0.02099900                  |
| H                                        | 3.61508200     | -0.00000200 | -0.00001300                 |
| H                                        | 2.36948700     | 2.14811600  | -0.03945300                 |
| H                                        | -0.13196700    | 2.12806100  | -0.03164100                 |
| H                                        | -0.13196400    | -2.12806700 | 0.03169000                  |
| H                                        | 2.36952900     | -2.14808700 | 0.03944900                  |
| C                                        | -1.81977600    | 0.00000600  | 0.00000200                  |
| O                                        | -2.36324800    | -1.12698100 | -0.04815100                 |
| O                                        | -2.36325300    | 1.12697700  | 0.04814100                  |
| Zero-point correction=                   |                |             | 0.098485 (Hartree/Particle) |
| Thermal correction to Energy=            |                |             | 0.105577                    |
| Thermal correction to Enthalpy=          |                |             | 0.106521                    |
| Thermal correction to Gibbs Free Energy= |                |             | 0.066607                    |
| SCF Done: E(RM062X) =                    | -420.310061800 |             |                             |

#### IM6a

|   |             |            |            |
|---|-------------|------------|------------|
| C | -0.32540000 | 1.68165900 | 0.23520700 |
|---|-------------|------------|------------|

|                                          |                |             |                             |
|------------------------------------------|----------------|-------------|-----------------------------|
| C                                        | -0.50405900    | 0.78157400  | 1.28846900                  |
| C                                        | -1.69178500    | 0.73754600  | 2.02284400                  |
| C                                        | -2.68087100    | 1.63236000  | 1.65168800                  |
| C                                        | -2.49856900    | 2.54036200  | 0.58786800                  |
| C                                        | -1.32237300    | 2.58312600  | -0.14121700                 |
| H                                        | -1.84009000    | 0.02813100  | 2.82929300                  |
| H                                        | -3.62654400    | 1.62477800  | 2.18319700                  |
| H                                        | -3.30795000    | 3.21357200  | 0.32565400                  |
| H                                        | -1.19114500    | 3.26479800  | -0.97377800                 |
| N                                        | 0.66066200     | 0.02853900  | 1.37290000                  |
| N                                        | 0.93793900     | 1.43890200  | -0.29038200                 |
| C                                        | 0.83311000     | -1.17984900 | 2.16746900                  |
| H                                        | 0.75795300     | -2.03891600 | 1.49643600                  |
| H                                        | 1.79814500     | -1.15706200 | 2.67528300                  |
| C                                        | 1.47018600     | 2.04364600  | -1.50698900                 |
| H                                        | 2.54356800     | 2.20083300  | -1.39946100                 |
| H                                        | 1.23196700     | 1.37604300  | -2.33801100                 |
| C                                        | 1.47182900     | 0.42751900  | 0.39182100                  |
| H                                        | 0.98627200     | 3.00992400  | -1.64369900                 |
| H                                        | 0.04134200     | -1.21281900 | 2.91411600                  |
| I                                        | 3.31996600     | -0.43182700 | -0.01830600                 |
| O                                        | 0.13546000     | -1.54616700 | -0.93057300                 |
| C                                        | -0.74977300    | -0.85033300 | -1.48904400                 |
| C                                        | -2.17857200    | -1.02693100 | -0.95956600                 |
| O                                        | -0.59667000    | -0.00830400 | -2.40469300                 |
| C                                        | -2.45838000    | -1.97334100 | 0.02964400                  |
| C                                        | -3.21205400    | -0.21565200 | -1.42975000                 |
| C                                        | -3.74598600    | -2.10423200 | 0.54465000                  |
| H                                        | -1.64603000    | -2.59976100 | 0.38648700                  |
| C                                        | -4.50245600    | -0.33795600 | -0.91595400                 |
| H                                        | -2.97901700    | 0.51558700  | -2.19757900                 |
| C                                        | -4.77138500    | -1.28173300 | 0.07495600                  |
| H                                        | -3.95330700    | -2.84442500 | 1.31284100                  |
| H                                        | -5.29875000    | 0.30252200  | -1.28562900                 |
| H                                        | -5.77589900    | -1.37926100 | 0.47696800                  |
| Zero-point correction=                   |                |             | 0.269690 (Hartree/Particle) |
| Thermal correction to Energy=            |                |             | 0.290070                    |
| Thermal correction to Enthalpy=          |                |             | 0.291014                    |
| Thermal correction to Gibbs Free Energy= |                |             | 0.217717                    |
| SCF Done: E(RM062X) =                    | -1176.23074033 |             |                             |

### TS3a

|   |             |            |            |
|---|-------------|------------|------------|
| C | -1.86395200 | 1.57706200 | 0.63195500 |
|---|-------------|------------|------------|



|                                          |                |             |                             |
|------------------------------------------|----------------|-------------|-----------------------------|
| C                                        | -1.95163400    | 1.49498100  | -0.75970200                 |
| C                                        | -2.35439900    | 2.58031800  | -1.52987500                 |
| C                                        | -2.65677000    | 3.75401800  | -0.84509100                 |
| C                                        | -2.55726500    | 3.83796200  | 0.55173600                  |
| C                                        | -2.15488100    | 2.74877100  | 1.31885000                  |
| H                                        | -2.43040100    | 2.51917500  | -2.60990000                 |
| H                                        | -2.97497800    | 4.62513100  | -1.40815400                 |
| H                                        | -2.79698600    | 4.77349000  | 1.04616200                  |
| H                                        | -2.06801300    | 2.81082000  | 2.39817400                  |
| N                                        | -1.57736500    | 0.19671900  | -1.10307900                 |
| N                                        | -1.46004800    | 0.32589200  | 1.09009300                  |
| C                                        | -1.41347100    | -0.32594200 | -2.44982100                 |
| H                                        | -0.46757600    | -0.86816500 | -2.49939200                 |
| H                                        | -2.24596800    | -0.98104700 | -2.71815800                 |
| C                                        | -0.95516300    | 0.09864100  | 2.43210100                  |
| H                                        | -0.79626100    | -0.96782000 | 2.58930500                  |
| H                                        | -0.00902900    | 0.63714900  | 2.53813200                  |
| C                                        | -1.22404800    | -0.45086100 | 0.01927100                  |
| H                                        | -1.68602100    | 0.46358300  | 3.15530000                  |
| H                                        | -1.37523600    | 0.51458100  | -3.14248600                 |
| I                                        | -1.30351200    | -2.57028600 | 0.12032800                  |
| O                                        | 0.92231800     | -0.57134900 | -0.14307500                 |
| C                                        | 1.54126200     | 0.52140300  | 0.07640300                  |
| C                                        | 3.05898700     | 0.43957100  | -0.01708800                 |
| O                                        | 1.02932700     | 1.61574300  | 0.35943500                  |
| C                                        | 3.69995700     | -0.76060500 | -0.33081700                 |
| C                                        | 3.82382500     | 1.58368500  | 0.21835500                  |
| C                                        | 5.08980700     | -0.81647600 | -0.40967600                 |
| H                                        | 3.09552200     | -1.64363500 | -0.51201900                 |
| C                                        | 5.21313500     | 1.53136300  | 0.14080500                  |
| H                                        | 3.30921100     | 2.50800100  | 0.46084400                  |
| C                                        | 5.84854900     | 0.32966700  | -0.17292600                 |
| H                                        | 5.58281600     | -1.75298900 | -0.65415400                 |
| H                                        | 5.80197700     | 2.42525300  | 0.32544800                  |
| H                                        | 6.93217600     | 0.28683200  | -0.23332800                 |
| Zero-point correction=                   |                |             | 0.268922 (Hartree/Particle) |
| Thermal correction to Energy=            |                |             | 0.288773                    |
| Thermal correction to Enthalpy=          |                |             | 0.289718                    |
| Thermal correction to Gibbs Free Energy= |                |             | 0.217761                    |
| SCF Done: E(RM062X) =                    | -1176.21650711 |             |                             |

#### Iodide (I-)

|   |            |            |            |
|---|------------|------------|------------|
| I | 0.00000000 | 0.00000000 | 0.00000000 |
|---|------------|------------|------------|

Zero-point correction= 0.000000 (Hartree/Particle)  
 Thermal correction to Energy= 0.001416  
 Thermal correction to Enthalpy= 0.002360  
 Thermal correction to Gibbs Free Energy= -0.016848  
 SCF Done: E(RM062X) = -297.804510770

**IM7a**

|   |             |             |             |
|---|-------------|-------------|-------------|
| C | -2.68189500 | -0.64513000 | -0.23361500 |
| C | -2.76360600 | 0.71958200  | 0.06160700  |
| C | -3.97936300 | 1.34311800  | 0.33285100  |
| C | -5.10504900 | 0.53338700  | 0.29733700  |
| C | -5.02223900 | -0.84122300 | 0.00368400  |
| C | -3.81081400 | -1.46069900 | -0.26675800 |
| H | -4.03644300 | 2.40177700  | 0.56128500  |
| H | -6.07616500 | 0.97073800  | 0.50311400  |
| H | -5.93148700 | -1.43259500 | -0.00943100 |
| H | -3.74159300 | -2.51994800 | -0.48910900 |
| N | -1.46415100 | 1.21775300  | 0.02282200  |
| N | -1.33746700 | -0.92720000 | -0.45873200 |
| C | -1.06380800 | 2.59615500  | 0.28998100  |
| H | 0.01588300  | 2.67451600  | 0.17098100  |
| H | -1.56409800 | 3.25470600  | -0.42134500 |
| C | -0.77949200 | -2.22898200 | -0.80899700 |
| H | -1.44475500 | -2.69639900 | -1.53515300 |
| H | 0.20119800  | -2.08537400 | -1.26319600 |
| C | -0.65711400 | 0.20494700  | -0.28789400 |
| H | -0.69672100 | -2.84651200 | 0.08655100  |
| H | -1.34610800 | 2.85452800  | 1.31156400  |
| O | 0.65519500  | 0.34501400  | -0.45331700 |
| C | 1.48733800  | -0.31976600 | 0.48115800  |
| O | 0.99889900  | -0.95386100 | 1.36900400  |
| C | 2.90851800  | -0.10345400 | 0.18091700  |
| C | 3.83500100  | -0.69001800 | 1.05105100  |
| C | 3.33382800  | 0.64924300  | -0.91919000 |
| C | 5.19303400  | -0.52120200 | 0.81806900  |
| H | 3.48083100  | -1.26977900 | 1.89741500  |
| C | 4.69580400  | 0.81092900  | -1.14377100 |
| H | 2.61165100  | 1.10008000  | -1.59083600 |
| C | 5.62141700  | 0.22850700  | -0.27813900 |
| H | 5.91720700  | -0.97214700 | 1.48830400  |
| H | 5.03595700  | 1.39177700  | -1.99458100 |
| H | 6.68387100  | 0.35918100  | -0.45943500 |

Zero-point correction= 0.271225 (Hartree/Particle)

Thermal correction to Energy= 0.289029  
 Thermal correction to Enthalpy= 0.289973  
 Thermal correction to Gibbs Free Energy= 0.224356  
 SCF Done: E(RM062X) = -878.450724441

**BnNH<sub>2</sub>**

|   |             |             |             |
|---|-------------|-------------|-------------|
| C | 2.31536800  | 0.31245200  | -0.06801100 |
| C | 1.38632200  | 1.34383700  | 0.05255500  |
| C | 0.02467700  | 1.05746200  | 0.13913800  |
| C | -0.42776200 | -0.26364600 | 0.10380100  |
| C | 0.51131400  | -1.29157100 | -0.02514100 |
| C | 1.87262300  | -1.00913000 | -0.10561200 |
| H | 3.37594900  | 0.53600100  | -0.13597900 |
| H | 1.72167100  | 2.37684400  | 0.07912900  |
| H | -0.70147000 | 1.85905600  | 0.23047600  |
| H | 0.16962100  | -2.32370400 | -0.06465900 |
| H | 2.58787200  | -1.82063000 | -0.20515900 |
| C | -1.90008400 | -0.59690900 | 0.22955700  |
| H | -2.13170500 | -0.77945800 | 1.28645900  |
| H | -2.08687000 | -1.54621700 | -0.29568400 |
| N | -2.75127100 | 0.50365900  | -0.22170700 |
| H | -2.64570700 | 0.60952900  | -1.23011900 |
| H | -3.72521300 | 0.24799500  | -0.07023800 |

Zero-point correction= 0.140015 (Hartree/Particle)  
 Thermal correction to Energy= 0.147472  
 Thermal correction to Enthalpy= 0.148416  
 Thermal correction to Gibbs Free Energy= 0.107701  
 SCF Done: E(RM062X) = -326.862309793

**TS4a**

|   |             |             |             |
|---|-------------|-------------|-------------|
| C | 0.16524200  | 1.44271500  | -0.56785400 |
| O | -0.44783900 | 1.46458800  | -1.60751400 |
| N | 1.46872400  | -0.07978000 | -0.77814500 |
| H | 0.87392500  | -0.88637800 | -0.98556800 |
| H | 1.96272300  | 0.14300300  | -1.64486900 |
| C | 1.11886900  | 2.48261400  | -0.07894000 |
| C | 1.45468400  | 2.63211300  | 1.26825600  |
| C | 2.36214700  | 3.61995600  | 1.64323600  |
| C | 2.93217000  | 4.45072400  | 0.68040700  |
| C | 2.59252800  | 4.29952600  | -0.66388300 |
| C | 1.68486100  | 3.31717400  | -1.04513100 |
| H | 1.00795800  | 1.98861600  | 2.01850400  |
| H | 2.62172700  | 3.74107100  | 2.69021600  |

|                                          |             |             |                             |
|------------------------------------------|-------------|-------------|-----------------------------|
| H                                        | 3.63900300  | 5.21910900  | 0.97805900                  |
| H                                        | 3.03131100  | 4.95010100  | -1.41377300                 |
| H                                        | 1.40324900  | 3.19159700  | -2.08618700                 |
| C                                        | 2.42402600  | -0.39688000 | 0.29728300                  |
| H                                        | 3.14929500  | 0.42090600  | 0.33446500                  |
| H                                        | 1.87309600  | -0.39492500 | 1.24376500                  |
| C                                        | 3.11340300  | -1.72618200 | 0.09516500                  |
| C                                        | 2.75060400  | -2.83893100 | 0.85625500                  |
| C                                        | 4.09394700  | -1.86729900 | -0.89228200                 |
| C                                        | 3.35966900  | -4.07449700 | 0.63868900                  |
| H                                        | 1.99263100  | -2.73422900 | 1.62980500                  |
| C                                        | 4.70171900  | -3.09948200 | -1.11283400                 |
| H                                        | 4.38387000  | -1.00274400 | -1.48597100                 |
| C                                        | 4.33483800  | -4.20663100 | -0.34679300                 |
| H                                        | 3.07371500  | -4.93186300 | 1.24068800                  |
| H                                        | 5.46568300  | -3.19665900 | -1.87841500                 |
| H                                        | 4.81192400  | -5.16716700 | -0.51604100                 |
| C                                        | -3.26438200 | -1.25093100 | 0.23719100                  |
| C                                        | -3.80985200 | -0.00325400 | -0.08284600                 |
| C                                        | -5.15088500 | 0.14494100  | -0.42645700                 |
| C                                        | -5.91824200 | -1.01205700 | -0.43192600                 |
| C                                        | -5.36961200 | -2.26654300 | -0.10915600                 |
| C                                        | -4.03216400 | -2.41250500 | 0.23359000                  |
| H                                        | -5.56862200 | 1.11383500  | -0.67773100                 |
| H                                        | -6.96880300 | -0.94710300 | -0.69446300                 |
| H                                        | -6.00819700 | -3.14321500 | -0.13001200                 |
| H                                        | -3.60250100 | -3.37763200 | 0.47973600                  |
| N                                        | -2.78101100 | 0.92609000  | 0.03052400                  |
| N                                        | -1.92062000 | -1.03757300 | 0.52520100                  |
| C                                        | -2.89970900 | 2.36248100  | -0.18846800                 |
| H                                        | -2.05164100 | 2.86096400  | 0.28106500                  |
| H                                        | -2.91031000 | 2.57359600  | -1.25833700                 |
| C                                        | -0.96286700 | -2.05704100 | 0.93399500                  |
| H                                        | -0.70906600 | -2.69061600 | 0.08148800                  |
| H                                        | -0.07183000 | -1.56155300 | 1.31851100                  |
| C                                        | -1.67107200 | 0.27108400  | 0.38670000                  |
| H                                        | -1.41155200 | -2.65839800 | 1.72636300                  |
| H                                        | -3.82412900 | 2.70249300  | 0.28021900                  |
| O                                        | -0.50124200 | 0.81784500  | 0.61754500                  |
| Zero-point correction=                   |             |             | 0.413731 (Hartree/Particle) |
| Thermal correction to Energy=            |             |             | 0.438911                    |
| Thermal correction to Enthalpy=          |             |             | 0.439855                    |
| Thermal correction to Gibbs Free Energy= |             |             | 0.357700                    |

SCF Done: E(RM062X) = -1205.31585592

**1,3-dimethylbenzimidazol-2-one**

|                                          |                |             |                             |
|------------------------------------------|----------------|-------------|-----------------------------|
| C                                        | 0.46578200     | -0.70332600 | -0.00001200                 |
| C                                        | 0.46578200     | 0.70332600  | -0.00001200                 |
| C                                        | 1.64846500     | 1.42590100  | 0.00002000                  |
| C                                        | 2.84371500     | 0.69815900  | 0.00005500                  |
| C                                        | 2.84371500     | -0.69815900 | 0.00005600                  |
| C                                        | 1.64846500     | -1.42590100 | 0.00002100                  |
| H                                        | 1.64459100     | 2.51145100  | 0.00002600                  |
| H                                        | 3.78812600     | 1.23303000  | 0.00008500                  |
| H                                        | 3.78812600     | -1.23303000 | 0.00008500                  |
| H                                        | 1.64459100     | -2.51145100 | 0.00002600                  |
| N                                        | -0.85943200    | 1.10622900  | -0.00005300                 |
| N                                        | -0.85943200    | -1.10622900 | -0.00005300                 |
| C                                        | -1.33613800    | 2.47027300  | 0.00000700                  |
| H                                        | -2.42632000    | 2.43874400  | -0.00013700                 |
| H                                        | -0.98853200    | 2.99843700  | 0.89255800                  |
| C                                        | -1.33613800    | -2.47027300 | 0.00000800                  |
| H                                        | -0.98853400    | -2.99843600 | 0.89256000                  |
| H                                        | -2.42632000    | -2.43874400 | -0.00013800                 |
| C                                        | -1.69363900    | 0.00000000  | -0.00002800                 |
| H                                        | -0.98829800    | -2.99858300 | -0.89236400                 |
| H                                        | -0.98829900    | 2.99858200  | -0.89236500                 |
| O                                        | -2.91589200    | 0.00000000  | -0.00003500                 |
| Zero-point correction=                   |                |             | 0.172009 (Hartree/Particle) |
| Thermal correction to Energy=            |                |             | 0.182793                    |
| Thermal correction to Enthalpy=          |                |             | 0.183737                    |
| Thermal correction to Gibbs Free Energy= |                |             | 0.136033                    |
| SCF Done: E(RM062X) =                    | -533.686663384 |             |                             |

**IM8a**

|   |             |             |             |
|---|-------------|-------------|-------------|
| C | -0.92917900 | -1.76321200 | -0.02370300 |
| C | -1.53465400 | -0.43561400 | -0.19400100 |
| O | -1.25569300 | -2.61208400 | 0.75432200  |
| C | -1.02114500 | 0.56435700  | -1.03140900 |
| C | -2.67725900 | -0.18715600 | 0.58241200  |
| C | -1.64998600 | 1.80227700  | -1.08341100 |
| H | -0.12717200 | 0.41780400  | -1.62918400 |
| C | -3.30142000 | 1.04930100  | 0.51809000  |
| H | -3.06093900 | -0.97011900 | 1.22811300  |
| C | -2.78670900 | 2.04447700  | -0.31374300 |
| H | -1.24803400 | 2.57963800  | -1.72429900 |

|                                          |                |             |                             |
|------------------------------------------|----------------|-------------|-----------------------------|
| H                                        | -4.18577700    | 1.24053800  | 1.11655100                  |
| H                                        | -3.27243100    | 3.01411800  | -0.36030900                 |
| N                                        | 0.25845200     | -2.12934100 | -0.89249200                 |
| C                                        | 1.58420000     | -2.03959000 | -0.14181900                 |
| H                                        | 0.11316600     | -3.11041700 | -1.17207300                 |
| H                                        | 0.31353900     | -1.58216100 | -1.76146400                 |
| C                                        | 1.92616400     | -0.60504800 | 0.13276900                  |
| H                                        | 1.44846400     | -2.62906800 | 0.76615500                  |
| H                                        | 2.31323700     | -2.52540900 | -0.79142300                 |
| C                                        | 2.59156300     | 0.14661700  | -0.83944500                 |
| C                                        | 1.52273600     | 0.00185900  | 1.32410300                  |
| C                                        | 2.83976600     | 1.49973800  | -0.62618100                 |
| H                                        | 2.91484100     | -0.33111600 | -1.76151900                 |
| C                                        | 1.77278300     | 1.35500100  | 1.53740400                  |
| H                                        | 1.00744800     | -0.58684300 | 2.08012700                  |
| C                                        | 2.42677000     | 2.10407200  | 0.56093800                  |
| H                                        | 3.35882600     | 2.08055200  | -1.38213300                 |
| H                                        | 1.45758700     | 1.82317800  | 2.46441400                  |
| H                                        | 2.62183600     | 3.15889600  | 0.72788900                  |
| Zero-point correction=                   |                |             | 0.241645 (Hartree/Particle) |
| Thermal correction to Energy=            |                |             | 0.255139                    |
| Thermal correction to Enthalpy=          |                |             | 0.256083                    |
| Thermal correction to Gibbs Free Energy= |                |             | 0.200705                    |
| SCF Done: E(RM062X) =                    | -671.646509686 |             |                             |

#### DABCO-H<sup>+</sup>

|   |             |             |             |
|---|-------------|-------------|-------------|
| C | 0.80677800  | 0.17135000  | 1.36989500  |
| C | -0.73414700 | 0.02847900  | 1.42079800  |
| H | 1.26997400  | -0.57414600 | 2.01991400  |
| H | 1.11070300  | 1.16328100  | 1.71215800  |
| H | -1.06010600 | -0.90985700 | 1.87251100  |
| H | -1.22669300 | 0.86353700  | 1.92024100  |
| C | 0.79510800  | -1.28265800 | -0.52814400 |
| H | 1.26639800  | -1.47770800 | -1.49387200 |
| H | 1.08144100  | -2.07998500 | 0.16200600  |
| C | -0.74420300 | -1.23534400 | -0.69357600 |
| H | -1.05975100 | -1.15509900 | -1.73481900 |
| H | -1.25170200 | -2.07782600 | -0.22280300 |
| C | -0.71730700 | 1.22877400  | -0.73085800 |
| H | -1.21414000 | 1.25228900  | -1.70147800 |
| H | -1.02635200 | 2.09408100  | -0.14238600 |
| C | 0.82099700  | 1.08734300  | -0.83761700 |
| H | 1.11507300  | 0.88240400  | -1.86978000 |

|                                          |                |             |                             |
|------------------------------------------|----------------|-------------|-----------------------------|
| H                                        | 1.30259800     | 2.01486900  | -0.52014300                 |
| N                                        | -1.21718700    | 0.01235500  | -0.00245300                 |
| N                                        | 1.29872200     | -0.01337700 | 0.00247500                  |
| H                                        | -2.24155100    | 0.02364800  | -0.00468300                 |
| Zero-point correction=                   |                |             | 0.190947 (Hartree/Particle) |
| Thermal correction to Energy=            |                |             | 0.197724                    |
| Thermal correction to Enthalpy=          |                |             | 0.198668                    |
| Thermal correction to Gibbs Free Energy= |                |             | 0.159775                    |
| SCF Done: E(RM062X) =                    | -345.744102875 |             |                             |

#### 4aa

|                                 |             |             |                             |
|---------------------------------|-------------|-------------|-----------------------------|
| C                               | -0.88446900 | -0.95087400 | -0.00128000                 |
| C                               | -2.18274700 | -0.19339500 | -0.02679500                 |
| O                               | -0.67546700 | -1.82360100 | 0.83804000                  |
| C                               | -2.29862000 | 1.10002100  | -0.54323900                 |
| C                               | -3.30196400 | -0.81744900 | 0.52975500                  |
| C                               | -3.52871700 | 1.75277500  | -0.51938900                 |
| H                               | -1.42971400 | 1.61920100  | -0.93807500                 |
| C                               | -4.53194400 | -0.16855600 | 0.54334200                  |
| H                               | -3.19118800 | -1.81377600 | 0.94585300                  |
| C                               | -4.64705000 | 1.11788200  | 0.01710700                  |
| H                               | -3.61052000 | 2.76121300  | -0.91300600                 |
| H                               | -5.40027700 | -0.66314900 | 0.96777000                  |
| H                               | -5.60566900 | 1.62764400  | 0.03200100                  |
| N                               | 0.01955100  | -0.62243400 | -0.95433300                 |
| C                               | 1.32902700  | -1.24989900 | -1.03043700                 |
| C                               | 2.41960800  | -0.41965200 | -0.38552300                 |
| H                               | 1.24456500  | -2.21671200 | -0.52718700                 |
| H                               | 1.56732000  | -1.43189100 | -2.08162700                 |
| C                               | 3.54339100  | -0.02380300 | -1.10951300                 |
| C                               | 2.30744100  | -0.04466100 | 0.95795800                  |
| C                               | 4.54610400  | 0.73451200  | -0.50385800                 |
| H                               | 3.63428600  | -0.30946900 | -2.15489900                 |
| C                               | 3.30418100  | 0.71378200  | 1.56310100                  |
| H                               | 1.43482400  | -0.35919900 | 1.52608300                  |
| C                               | 4.42767100  | 1.10543800  | 0.83255200                  |
| H                               | 5.41636500  | 1.03706500  | -1.07895100                 |
| H                               | 3.20884200  | 0.99758400  | 2.60718000                  |
| H                               | 5.20593100  | 1.69672700  | 1.30578200                  |
| H                               | -0.21935800 | 0.06389300  | -1.65759500                 |
| Zero-point correction=          |             |             | 0.227503 (Hartree/Particle) |
| Thermal correction to Energy=   |             |             | 0.241415                    |
| Thermal correction to Enthalpy= |             |             | 0.242359                    |

Thermal correction to Gibbs Free Energy= 0.183423

SCF Done: E(RM062X) = -671.232032264

## 11.2 K<sub>2</sub>S<sub>2</sub>O<sub>8</sub>-3a-DABCO system

### 3a

|   |             |             |             |
|---|-------------|-------------|-------------|
| C | -2.57713100 | 0.68667500  | -0.00010200 |
| C | -2.44457900 | -0.70647600 | -0.00011200 |
| C | -3.55358500 | -1.55246900 | -0.00020700 |
| C | -4.79569500 | -0.93699000 | -0.00029200 |
| C | -4.92959700 | 0.46629100  | -0.00028700 |
| C | -3.82686500 | 1.30667100  | -0.00019100 |
| H | -3.44412600 | -2.63149400 | -0.00021000 |
| H | -5.69009300 | -1.55079200 | -0.00036500 |
| H | -5.92400300 | 0.89955900  | -0.00035700 |
| H | -3.92643200 | 2.38656700  | -0.00018500 |
| N | -1.08154900 | -0.97218900 | -0.00000800 |
| N | -1.28737500 | 1.20396500  | 0.00002000  |
| C | -0.46903200 | -2.29619200 | 0.00002100  |
| H | 0.61453800  | -2.17271500 | 0.00006100  |
| H | -0.78108600 | -2.83691600 | 0.89499100  |
| C | -0.93459900 | 2.61967000  | 0.00008000  |
| H | -1.34330000 | 3.09205800  | 0.89475400  |
| H | 0.15220600  | 2.70323700  | 0.00018900  |
| C | -0.42967500 | 0.18699500  | 0.00007300  |
| H | -1.34312400 | 3.09209200  | -0.89465600 |
| H | -0.78101600 | -2.83691700 | -0.89497300 |
| H | 0.65414900  | 0.28193100  | 0.00016400  |
| I | 3.43696800  | -0.01309600 | 0.00012500  |

Zero-point correction= 0.190632 (Hartree/Particle)

Thermal correction to Energy= 0.202528

Thermal correction to Enthalpy= 0.203472

Thermal correction to Gibbs Free Energy= 0.148913

SCF Done: E(RM062X) = -756.700062140

### K<sub>2</sub>S<sub>2</sub>O<sub>8</sub>

|   |             |             |             |
|---|-------------|-------------|-------------|
| O | -2.73222000 | 0.46609300  | -1.08165100 |
| S | -1.86956600 | 0.63007000  | 0.10208300  |
| O | -1.50433700 | 1.98284400  | 0.46984800  |
| O | -2.29496500 | -0.24129200 | 1.21353300  |
| O | -0.49312700 | -0.11546900 | -0.51523400 |
| O | 0.49347200  | -0.11518700 | 0.51563800  |
| S | 1.86977000  | 0.63034500  | -0.10204900 |



|                                          |                |             |                             |
|------------------------------------------|----------------|-------------|-----------------------------|
| O                                        | 1.50444300     | 1.98308800  | -0.46983500                 |
| O                                        | 2.73267300     | 0.46647500  | 1.08151200                  |
| O                                        | 2.29487500     | -0.24110700 | -1.21353500                 |
| K                                        | 4.27339800     | -1.41211300 | 0.06521500                  |
| K                                        | -4.27391400    | -1.41158200 | -0.06535900                 |
| Zero-point correction=                   |                |             | 0.037004 (Hartree/Particle) |
| Thermal correction to Energy=            |                |             | 0.050181                    |
| Thermal correction to Enthalpy=          |                |             | 0.051125                    |
| Thermal correction to Gibbs Free Energy= |                |             | -0.006873                   |
| SCF Done: E(RM062X) =                    | -2597.97706329 |             |                             |

### TS1b

|   |             |             |             |
|---|-------------|-------------|-------------|
| O | -4.98306500 | 1.91799000  | 0.15093300  |
| S | -3.85430600 | 1.24538600  | -0.50210200 |
| O | -4.25207800 | 0.14263200  | -1.40487700 |
| O | -2.87251000 | 2.16968500  | -1.10777800 |
| O | -3.11062000 | 0.54183300  | 0.74447700  |
| O | -1.62444200 | -0.29798500 | 0.02984900  |
| S | -1.06819500 | -0.99874300 | 1.50205100  |
| O | -0.11162900 | -2.03393600 | 1.11555000  |
| O | -0.46040300 | 0.15880100  | 2.18560200  |
| O | -2.27840600 | -1.54468800 | 2.12139200  |
| K | -3.85086200 | -1.97754000 | 0.01748300  |
| I | 0.26843600  | -0.39455300 | -1.67093900 |
| K | -0.85839600 | 2.21508900  | 0.49545200  |
| H | 1.67594100  | -1.05600100 | 1.96404100  |
| C | 2.52062600  | -0.65942400 | 1.41798900  |
| N | 3.00417900  | 0.57427400  | 1.54980100  |
| N | 3.19008600  | -1.32354900 | 0.48190000  |
| C | 4.04699900  | 0.73255100  | 0.64587300  |
| C | 2.53852000  | 1.57547600  | 2.50098700  |
| C | 4.16444700  | -0.48277200 | -0.03790000 |
| C | 2.90109500  | -2.67869200 | 0.02874600  |
| C | 4.87681100  | 1.81839800  | 0.36726300  |
| H | 1.61037100  | 1.21838000  | 2.94763100  |
| H | 3.29413900  | 1.72666000  | 3.27439000  |
| H | 2.36996400  | 2.51620500  | 1.97222400  |
| C | 5.11822700  | -0.67558800 | -1.03750200 |
| H | 3.72270100  | -3.33992000 | 0.31062600  |
| H | 1.96907600  | -2.99933500 | 0.49283500  |
| H | 2.77978700  | -2.66697100 | -1.05585900 |
| C | 5.82344300  | 1.62827300  | -0.62804900 |
| H | 4.78492800  | 2.75695200  | 0.90349200  |

|                                          |                |             |                             |
|------------------------------------------|----------------|-------------|-----------------------------|
| C                                        | 5.94153500     | 0.40449400  | -1.31768700                 |
| H                                        | 5.20632700     | -1.61995400 | -1.56369000                 |
| H                                        | 6.49232500     | 2.44307900  | -0.88370600                 |
| H                                        | 6.69839600     | 0.30643500  | -2.08858100                 |
| Zero-point correction=                   |                |             | 0.227284 (Hartree/Particle) |
| Thermal correction to Energy=            |                |             | 0.252458                    |
| Thermal correction to Enthalpy=          |                |             | 0.253402                    |
| Thermal correction to Gibbs Free Energy= |                |             | 0.168729                    |
| SCF Done: E(RM062X) =                    | -3354.67730483 |             |                             |

### IM1b

|                                          |                |             |                             |
|------------------------------------------|----------------|-------------|-----------------------------|
| C                                        | -0.20396100    | 0.69917000  | 0.00000200                  |
| C                                        | -0.20396100    | -0.69917000 | 0.00000200                  |
| C                                        | -1.38775600    | -1.43724100 | 0.00002600                  |
| C                                        | -2.56448700    | -0.70522800 | 0.00005100                  |
| C                                        | -2.56448700    | 0.70522800  | 0.00005100                  |
| C                                        | -1.38775600    | 1.43724100  | 0.00002600                  |
| H                                        | -1.38132900    | -2.52215900 | 0.00002700                  |
| H                                        | -3.51365400    | -1.23041500 | 0.00007100                  |
| H                                        | -3.51365400    | 1.23041500  | 0.00007100                  |
| H                                        | -1.38132900    | 2.52215900  | 0.00002700                  |
| N                                        | 1.12811700     | -1.09308500 | -0.00002300                 |
| N                                        | 1.12811700     | 1.09308500  | -0.00002300                 |
| C                                        | 1.60458900     | -2.47140600 | -0.00002900                 |
| H                                        | 2.69383000     | -2.45909600 | -0.00005300                 |
| H                                        | 1.23842900     | -2.97764200 | 0.89445300                  |
| C                                        | 1.60458900     | 2.47140600  | -0.00002900                 |
| H                                        | 1.23842900     | 2.97764200  | 0.89445400                  |
| H                                        | 2.69383000     | 2.45909600  | -0.00005300                 |
| C                                        | 1.88467800     | 0.00000000  | -0.00003800                 |
| H                                        | 1.23838900     | 2.97764800  | -0.89449100                 |
| H                                        | 1.23838900     | -2.97764800 | -0.89449200                 |
| H                                        | 2.96635100     | 0.00000000  | -0.00006000                 |
| Zero-point correction=                   |                |             | 0.190975 (Hartree/Particle) |
| Thermal correction to Energy=            |                |             | 0.200122                    |
| Thermal correction to Enthalpy=          |                |             | 0.201067                    |
| Thermal correction to Gibbs Free Energy= |                |             | 0.157193                    |
| SCF Done: E(RM062X) =                    | -458.880777939 |             |                             |

### IM2b

|   |             |             |             |
|---|-------------|-------------|-------------|
| O | -0.34353600 | 0.91787500  | 0.00001700  |
| S | -1.70003500 | -0.07318600 | -0.00000100 |
| O | -1.59835500 | -0.85901200 | -1.23145400 |

|                                          |                |             |                             |
|------------------------------------------|----------------|-------------|-----------------------------|
| O                                        | -1.59836600    | -0.85905000 | 1.23142900                  |
| O                                        | -2.72761300    | 0.96990500  | 0.00000900                  |
| I                                        | 1.45931200     | -0.00352400 | 0.00000000                  |
| Zero-point correction=                   |                |             | 0.017367 (Hartree/Particle) |
| Thermal correction to Energy=            |                |             | 0.023209                    |
| Thermal correction to Enthalpy=          |                |             | 0.024153                    |
| Thermal correction to Gibbs Free Energy= |                |             | -0.014955                   |
| SCF Done: E(RM062X) =                    | -996.766200845 |             |                             |

### **K<sub>2</sub>SO<sub>4</sub>**

|                                          |                |             |                             |
|------------------------------------------|----------------|-------------|-----------------------------|
| O                                        | 0.88478800     | 0.55209400  | -1.08456600                 |
| S                                        | 0.00000000     | 0.00005100  | -0.00020500                 |
| O                                        | 0.88444200     | -0.55215800 | 1.08435600                  |
| O                                        | -0.88457300    | 1.08459200  | 0.55183100                  |
| O                                        | -0.88465500    | -1.08433200 | -0.55242000                 |
| K                                        | -3.12076900    | -0.00006300 | 0.00025500                  |
| K                                        | 3.12076800     | -0.00006200 | 0.00025400                  |
| Zero-point correction=                   |                |             | 0.018053 (Hartree/Particle) |
| Thermal correction to Energy=            |                |             | 0.026040                    |
| Thermal correction to Enthalpy=          |                |             | 0.026984                    |
| Thermal correction to Gibbs Free Energy= |                |             | -0.020193                   |
| SCF Done: E(RM062X) =                    | -1899.05709157 |             |                             |

### **DABCO**

|   |             |             |             |
|---|-------------|-------------|-------------|
| C | -0.77810600 | 0.66846400  | -1.20524700 |
| C | 0.77810400  | 0.66846800  | -1.20524600 |
| H | -1.17537800 | 0.14076900  | -2.07885300 |
| H | -1.17569100 | 1.68887400  | -1.22062100 |
| H | 1.17538000  | 0.14077000  | -2.07884800 |
| H | 1.17568500  | 1.68888000  | -1.22062500 |
| C | -0.77813000 | -1.37808100 | 0.02375000  |
| H | -1.17571800 | -1.87070100 | 0.91753100  |
| H | -1.17573700 | -1.90186200 | -0.85218200 |
| C | 0.77814300  | -1.37807400 | 0.02375700  |
| H | 1.17572800  | -1.87068600 | 0.91754300  |
| H | 1.17576200  | -1.90185500 | -0.85217000 |
| C | 0.77809700  | 0.70961900  | 1.18145900  |
| H | 1.17582900  | 0.21287900  | 2.07294900  |
| H | 1.17549200  | 1.73006500  | 1.16105200  |
| C | -0.77810800 | 0.70960900  | 1.18145800  |
| H | -1.17583600 | 0.21285900  | 2.07294500  |
| H | -1.17551700 | 1.73005000  | 1.16105500  |
| N | 1.28717800  | 0.00000100  | 0.00004800  |

|                                          |                |             |                             |
|------------------------------------------|----------------|-------------|-----------------------------|
| N                                        | -1.28717800    | -0.00001100 | 0.00004300                  |
| Zero-point correction=                   |                |             | 0.186516 (Hartree/Particle) |
| Thermal correction to Energy=            |                |             | 0.192767                    |
| Thermal correction to Enthalpy=          |                |             | 0.193711                    |
| Thermal correction to Gibbs Free Energy= |                |             | 0.155933                    |
| SCF Done: E(RM062X) =                    | -345.282368404 |             |                             |

**TS2b**

|   |             |             |             |
|---|-------------|-------------|-------------|
| C | 2.83733800  | 0.69289400  | -0.00234100 |
| C | 2.77843000  | -0.70341300 | -0.00530200 |
| C | 3.93150300  | -1.48742700 | 0.00807500  |
| C | 5.14325900  | -0.80901500 | 0.02555500  |
| C | 5.20281500  | 0.59716300  | 0.03033200  |
| C | 4.05284100  | 1.37593400  | 0.01643700  |
| H | 3.88178000  | -2.57146700 | 0.00480000  |
| H | 6.06818000  | -1.37638600 | 0.03636700  |
| H | 6.17246000  | 1.08399700  | 0.04508300  |
| H | 4.09670200  | 2.46017500  | 0.02075100  |
| N | 1.42779100  | -1.02559400 | -0.02310700 |
| N | 1.51891700  | 1.13055000  | -0.02074800 |
| C | 0.91733100  | -2.38598200 | -0.02826500 |
| H | -0.17219800 | -2.34262600 | -0.03505900 |
| H | 1.26751600  | -2.91344200 | -0.91875900 |
| C | 1.13588400  | 2.53255300  | -0.02885900 |
| H | 1.53203200  | 3.02180600  | -0.92188500 |
| H | 0.04800200  | 2.59295100  | -0.03246400 |
| C | 0.66429500  | 0.08676800  | -0.03376500 |
| H | 1.52584800  | 3.02968100  | 0.86250400  |
| H | 1.25571900  | -2.91518800 | 0.86573100  |
| H | -0.82609000 | 0.07162200  | -0.03268700 |
| C | -2.49862100 | -0.68172400 | 1.20926200  |
| C | -4.04906800 | -0.62661600 | 1.26317700  |
| H | -2.12140000 | -1.70623100 | 1.14613200  |
| H | -2.03138200 | -0.18926800 | 2.06621500  |
| H | -4.46373400 | -1.63131700 | 1.38011900  |
| H | -4.38517900 | -0.01890900 | 2.10760400  |
| C | -2.54438000 | -0.68878300 | -1.21784200 |
| H | -2.21972200 | -0.11796200 | -2.09170800 |
| H | -2.06119900 | -1.66941900 | -1.24076300 |
| C | -4.09031000 | -0.79542100 | -1.11941000 |
| H | -4.55954600 | -0.40305100 | -2.02544700 |
| H | -4.39891200 | -1.83760200 | -0.99980500 |
| C | -4.12712100 | 1.35056200  | -0.07441000 |

|                                          |                |             |                             |
|------------------------------------------|----------------|-------------|-----------------------------|
| H                                        | -4.49204400    | 1.75829600  | -1.02095600                 |
| H                                        | -4.56903300    | 1.93088500  | 0.73981200                  |
| C                                        | -2.57756500    | 1.41632500  | -0.01032800                 |
| H                                        | -2.14618100    | 1.93511500  | -0.87081800                 |
| H                                        | -2.21966200    | 1.89510400  | 0.90535800                  |
| N                                        | -4.58702700    | -0.03716000 | 0.03292000                  |
| N                                        | -2.05135700    | 0.02796700  | -0.01535400                 |
| Zero-point correction=                   |                |             | 0.374537 (Hartree/Particle) |
| Thermal correction to Energy=            |                |             | 0.391378                    |
| Thermal correction to Enthalpy=          |                |             | 0.392322                    |
| Thermal correction to Gibbs Free Energy= |                |             | 0.329095                    |
| SCF Done: E(RM062X) =                    | -804.156106691 |             |                             |

### DABCO-H<sup>+</sup>

|                                          |                |             |                             |
|------------------------------------------|----------------|-------------|-----------------------------|
| C                                        | 0.81939100     | -1.24181400 | -0.59022900                 |
| C                                        | -0.72427200    | -1.23321100 | -0.71900300                 |
| H                                        | 1.27438700     | -1.37066800 | -1.57473200                 |
| H                                        | 1.14378700     | -2.06558900 | 0.04988500                  |
| H                                        | -1.06583600    | -1.14444500 | -1.75146800                 |
| H                                        | -1.19893100    | -2.09667700 | -0.25144900                 |
| C                                        | 0.79630900     | 1.14104100  | -0.79019400                 |
| H                                        | 1.24580700     | 2.06264200  | -0.41385500                 |
| H                                        | 1.10977100     | 1.00313100  | -1.82757500                 |
| C                                        | -0.74782400    | 1.23131800  | -0.69945100                 |
| H                                        | -1.09250600    | 2.07741300  | -0.10259200                 |
| H                                        | -1.23478500    | 1.25221800  | -1.67511200                 |
| C                                        | -0.72896200    | -0.01708300 | 1.42515800                  |
| H                                        | -1.21696500    | 0.81319400  | 1.93697800                  |
| H                                        | -1.05827500    | -0.95972500 | 1.86505100                  |
| C                                        | 0.81332500     | 0.12205400  | 1.37294800                  |
| H                                        | 1.12251300     | 1.09214300  | 1.76905800                  |
| H                                        | 1.27829300     | -0.66063300 | 1.97643800                  |
| N                                        | -1.21712000    | -0.01114700 | 0.00386400                  |
| N                                        | 1.29804700     | 0.01179800  | -0.00434000                 |
| H                                        | -2.24155300    | -0.02138700 | 0.00734200                  |
| Zero-point correction=                   |                |             | 0.201648 (Hartree/Particle) |
| Thermal correction to Energy=            |                |             | 0.208042                    |
| Thermal correction to Enthalpy=          |                |             | 0.208986                    |
| Thermal correction to Gibbs Free Energy= |                |             | 0.171001                    |
| SCF Done: E(RM062X) =                    | -345.743561760 |             |                             |

### IM3b (NHC)

|   |            |             |            |
|---|------------|-------------|------------|
| C | 0.00000000 | -0.16302600 | 0.69957800 |
|---|------------|-------------|------------|

|                                          |             |             |                             |
|------------------------------------------|-------------|-------------|-----------------------------|
| C                                        | 0.00000000  | -0.16302600 | -0.69957800                 |
| C                                        | 0.00000000  | -1.34953600 | -1.42972600                 |
| C                                        | 0.00000000  | -2.53655700 | -0.70235600                 |
| C                                        | 0.00000000  | -2.53655700 | 0.70235600                  |
| C                                        | 0.00000000  | -1.34953600 | 1.42972600                  |
| H                                        | 0.00000000  | -1.34758000 | -2.51540900                 |
| H                                        | 0.00000000  | -3.48399400 | -1.23212700                 |
| H                                        | 0.00000000  | -3.48399400 | 1.23212700                  |
| H                                        | 0.00000000  | -1.34758000 | 2.51540900                  |
| N                                        | 0.00000000  | 1.17439000  | -1.07108200                 |
| N                                        | 0.00000000  | 1.17439000  | 1.07108200                  |
| C                                        | 0.00000000  | 1.60987000  | -2.45384700                 |
| H                                        | 0.00000000  | 2.69937700  | -2.46381100                 |
| H                                        | 0.89082000  | 1.24090500  | -2.97060200                 |
| C                                        | 0.00000000  | 1.60987000  | 2.45384700                  |
| H                                        | 0.89082000  | 1.24090500  | 2.97060200                  |
| H                                        | 0.00000000  | 2.69937700  | 2.46381100                  |
| C                                        | 0.00000000  | 2.02171900  | 0.00000000                  |
| H                                        | -0.89082000 | 1.24090500  | 2.97060200                  |
| H                                        | -0.89082000 | 1.24090500  | -2.97060200                 |
| Zero-point correction=                   |             |             | 0.176714 (Hartree/Particle) |
| Thermal correction to Energy=            |             |             | 0.185896                    |
| Thermal correction to Enthalpy=          |             |             | 0.186840                    |
| Thermal correction to Gibbs Free Energy= |             |             | 0.142775                    |
| SCF Done: E(RM062X) = -458.397915591     |             |             |                             |

#### IM4b

|   |             |             |             |
|---|-------------|-------------|-------------|
| O | -3.19207300 | -0.67234100 | -0.51212700 |
| S | -4.24271100 | 0.23684600  | 0.20641900  |
| O | -3.49148300 | 1.23122000  | 1.01840300  |
| O | -5.04799700 | 0.88967300  | -0.85941800 |
| O | -5.07323800 | -0.65577700 | 1.05693200  |
| I | -0.93605300 | -0.32598700 | -0.23712900 |
| C | 1.27252100  | -0.10941300 | -0.07967900 |
| N | 2.16738100  | -1.11002500 | 0.01481100  |
| N | 1.95088500  | 1.05221500  | -0.06990700 |
| C | 3.45246400  | -0.58685200 | 0.08630800  |
| C | 1.88822800  | -2.53847400 | 0.05190200  |
| C | 3.31333600  | 0.80078700  | 0.02887500  |
| C | 1.39610500  | 2.39611700  | -0.15454700 |
| C | 4.70166500  | -1.19710300 | 0.18947500  |
| H | 0.81595400  | -2.69711400 | -0.04805200 |
| H | 2.40767500  | -3.02925600 | -0.77380600 |

|                                          |                |             |                             |
|------------------------------------------|----------------|-------------|-----------------------------|
| H                                        | 2.23047600     | -2.95072000 | 1.00348200                  |
| C                                        | 4.41578300     | 1.65318200  | 0.07073200                  |
| H                                        | 1.75829700     | 2.88170700  | -1.06322500                 |
| H                                        | 0.30951000     | 2.33575000  | -0.18033100                 |
| H                                        | 1.70671400     | 2.96870800  | 0.72185600                  |
| C                                        | 5.80180900     | -0.35083600 | 0.23141500                  |
| H                                        | 4.80629900     | -2.27583600 | 0.23377900                  |
| C                                        | 5.66152500     | 1.04841400  | 0.17273600                  |
| H                                        | 4.30334200     | 2.73111400  | 0.02487500                  |
| H                                        | 6.79556800     | -0.77876700 | 0.31054000                  |
| H                                        | 6.55021700     | 1.66973300  | 0.20805500                  |
| Zero-point correction=                   |                |             | 0.196216 (Hartree/Particle) |
| Thermal correction to Energy=            |                |             | 0.213177                    |
| Thermal correction to Enthalpy=          |                |             | 0.214121                    |
| Thermal correction to Gibbs Free Energy= |                |             | 0.148258                    |
| SCF Done: E(RM062X) =                    | -1455.21301855 |             |                             |

#### Sulfate (SO<sub>4</sub><sup>2-</sup>)

|                                          |                |             |                             |
|------------------------------------------|----------------|-------------|-----------------------------|
| O                                        | 1.38448300     | 0.14767800  | -0.57275600                 |
| S                                        | 0.00014500     | -0.00009300 | -0.00010000                 |
| O                                        | -0.22315200    | 1.05440800  | 1.05056400                  |
| O                                        | -1.01782600    | 0.16245500  | -1.09690500                 |
| O                                        | -0.14379500    | -1.36435500 | 0.61929700                  |
| Zero-point correction=                   |                |             | 0.016094 (Hartree/Particle) |
| Thermal correction to Energy=            |                |             | 0.020071                    |
| Thermal correction to Enthalpy=          |                |             | 0.021015                    |
| Thermal correction to Gibbs Free Energy= |                |             | -0.011360                   |
| SCF Done: E(RM062X) =                    | -699.273522785 |             |                             |

#### IM5a

|   |             |             |             |
|---|-------------|-------------|-------------|
| C | 0.01295800  | 1.78557400  | 0.69919300  |
| C | 0.01295800  | 1.78557400  | -0.69919300 |
| C | -0.00554000 | 2.97280700  | -1.43535100 |
| C | -0.02237500 | 4.14837800  | -0.70513200 |
| C | -0.02237500 | 4.14837800  | 0.70513200  |
| C | -0.00554000 | 2.97280700  | 1.43535100  |
| H | -0.01436600 | 2.97514800  | -2.51936600 |
| H | -0.03995100 | 5.09630600  | -1.23179700 |
| H | -0.03995100 | 5.09630600  | 1.23179700  |
| H | -0.01436600 | 2.97514800  | 2.51936600  |
| N | 0.02759400  | 0.45278000  | -1.09946200 |
| N | 0.02759400  | 0.45278000  | 1.09946200  |
| C | 0.01667500  | -0.02969600 | -2.47951300 |

|                                          |                |             |                             |
|------------------------------------------|----------------|-------------|-----------------------------|
| H                                        | 0.78794600     | -0.79039000 | -2.60391600                 |
| H                                        | -0.96702300    | -0.43629600 | -2.72147000                 |
| C                                        | 0.01667500     | -0.02969600 | 2.47951300                  |
| H                                        | -0.96702300    | -0.43629600 | 2.72147000                  |
| H                                        | 0.78794600     | -0.79039000 | 2.60391600                  |
| C                                        | 0.02812500     | -0.30381300 | 0.00000000                  |
| H                                        | 0.24277900     | 0.81012700  | 3.13369200                  |
| H                                        | 0.24277900     | 0.81012700  | -3.13369200                 |
| I                                        | -0.01121600    | -2.38397300 | 0.00000000                  |
| Zero-point correction=                   |                |             | 0.180088 (Hartree/Particle) |
| Thermal correction to Energy=            |                |             | 0.191032                    |
| Thermal correction to Enthalpy=          |                |             | 0.191976                    |
| Thermal correction to Gibbs Free Energy= |                |             | 0.142006                    |
| SCF Done: E(RM062X) =                    | -755.894899587 |             |                             |

### PhCO<sub>2</sub>H

|                                          |                |             |                             |
|------------------------------------------|----------------|-------------|-----------------------------|
| C                                        | -2.56205300    | -0.04204800 | 0.00010200                  |
| C                                        | -1.83683700    | -1.23292000 | 0.00013200                  |
| C                                        | -0.44562700    | -1.20184700 | 0.00007400                  |
| C                                        | 0.21785600     | 0.02791100  | -0.00001200                 |
| C                                        | -0.50894200    | 1.22082800  | -0.00004200                 |
| C                                        | -1.89852100    | 1.18501700  | 0.00001400                  |
| H                                        | -3.64769200    | -0.07004500 | 0.00014700                  |
| H                                        | -2.35533800    | -2.18652500 | 0.00020200                  |
| H                                        | 0.12475800     | -2.12448300 | 0.00009800                  |
| H                                        | 0.02693900     | 2.16459800  | -0.00011100                 |
| H                                        | -2.46479200    | 2.11103100  | -0.00001100                 |
| C                                        | 1.70298800     | 0.11775700  | -0.00007000                 |
| O                                        | 2.32689500     | 1.15539300  | -0.00013000                 |
| O                                        | 2.30265200     | -1.08266100 | -0.00004700                 |
| H                                        | 3.26656300     | -0.92462100 | -0.00008700                 |
| Zero-point correction=                   |                |             | 0.117015 (Hartree/Particle) |
| Thermal correction to Energy=            |                |             | 0.124065                    |
| Thermal correction to Enthalpy=          |                |             | 0.125009                    |
| Thermal correction to Gibbs Free Energy= |                |             | 0.085092                    |
| SCF Done: E(RM062X) =                    | -420.787966894 |             |                             |

### Benzoate (PhCOO<sup>-</sup>)

|   |             |             |             |
|---|-------------|-------------|-------------|
| C | -2.52848900 | 0.00000000  | -0.00000400 |
| C | -1.82744500 | -1.20606000 | -0.02096900 |
| C | -0.43390200 | -1.20140300 | -0.01794100 |
| C | 0.27768700  | 0.00000000  | 0.00000100  |
| C | -0.43390200 | 1.20140300  | 0.01794000  |



|                                          |                |             |                             |
|------------------------------------------|----------------|-------------|-----------------------------|
| C                                        | -1.82744500    | 1.20606000  | 0.02096300                  |
| H                                        | -3.61519600    | 0.00000000  | -0.00000600                 |
| H                                        | -2.36944500    | -2.14817300 | -0.03951000                 |
| H                                        | 0.13223800     | -2.12784500 | -0.03156600                 |
| H                                        | 0.13223800     | 2.12784600  | 0.03156700                  |
| H                                        | -2.36944600    | 2.14817300  | 0.03950200                  |
| C                                        | 1.82017400     | 0.00000000  | 0.00000300                  |
| O                                        | 2.36309600     | 1.12699900  | -0.04793200                 |
| O                                        | 2.36309600     | -1.12699900 | 0.04794000                  |
| Zero-point correction=                   |                |             | 0.103982 (Hartree/Particle) |
| Thermal correction to Energy=            |                |             | 0.110771                    |
| Thermal correction to Enthalpy=          |                |             | 0.111715                    |
| Thermal correction to Gibbs Free Energy= |                |             | 0.072330                    |
| SCF Done: E(RM062X) =                    | -420.309542506 |             |                             |

### TS3b

|   |             |             |             |
|---|-------------|-------------|-------------|
| C | 1.86081700  | 1.58050700  | -0.63082000 |
| C | 1.94991400  | 1.49795200  | 0.76069300  |
| C | 2.34879600  | 2.58464600  | 1.53113400  |
| C | 2.64597800  | 3.75981400  | 0.84679600  |
| C | 2.54532200  | 3.84406600  | -0.54999100 |
| C | 2.14693300  | 2.75371000  | -1.31733500 |
| H | 2.42560900  | 2.52361600  | 2.61111300  |
| H | 2.96073700  | 4.63200800  | 1.41016000  |
| H | 2.78080200  | 4.78086700  | -1.04407500 |
| H | 2.05880900  | 2.81617800  | -2.39653800 |
| N | 1.58111900  | 0.19790700  | 1.10354800  |
| N | 1.46134600  | 0.32806400  | -1.08941800 |
| C | 1.41733900  | -0.32566000 | 2.45006800  |
| H | 0.47067800  | -0.86662700 | 2.49948500  |
| H | 2.24924200  | -0.98195300 | 2.71740800  |
| C | 0.95533800  | 0.10022700  | -2.43104300 |
| H | 0.79603900  | -0.96627900 | -2.58741500 |
| H | 0.00915300  | 0.63889500  | -2.53567700 |
| C | 1.22955900  | -0.45011200 | -0.01898100 |
| H | 1.68562800  | 0.46468200  | -3.15509700 |
| H | 1.38046900  | 0.51442800  | 3.14333600  |
| I | 1.30876900  | -2.56873400 | -0.12110600 |
| O | -0.92219000 | -0.57291700 | 0.14805900  |
| C | -1.54268100 | 0.51730200  | -0.07799800 |
| C | -3.06044400 | 0.43473500  | 0.01696700  |
| O | -1.03248600 | 1.61054400  | -0.36909800 |
| C | -3.70046700 | -0.76528200 | 0.33318800  |

|                                          |                |             |                             |
|------------------------------------------|----------------|-------------|-----------------------------|
| C                                        | -3.82621700    | 1.57780100  | -0.22056000                 |
| C                                        | -5.09030600    | -0.82212100 | 0.41221900                  |
| H                                        | -3.09506300    | -1.64734600 | 0.51603700                  |
| C                                        | -5.21546700    | 1.52462100  | -0.14251000                 |
| H                                        | -3.31210900    | 2.50192900  | -0.46488700                 |
| C                                        | -5.84997600    | 0.32297800  | 0.17329200                  |
| H                                        | -5.58261600    | -1.75862500 | 0.65830900                  |
| H                                        | -5.80500800    | 2.41779100  | -0.32864400                 |
| H                                        | -6.93360800    | 0.27940800  | 0.23377800                  |
| Zero-point correction=                   |                |             | 0.283980 (Hartree/Particle) |
| Thermal correction to Energy=            |                |             | 0.303020                    |
| Thermal correction to Enthalpy=          |                |             | 0.303964                    |
| Thermal correction to Gibbs Free Energy= |                |             | 0.233797                    |
| SCF Done: E(RM062X) =                    | -1176.21821750 |             |                             |

### Iodide (I)

|                                          |                |            |                             |
|------------------------------------------|----------------|------------|-----------------------------|
| I                                        | 0.00000000     | 0.00000000 | 0.00000000                  |
| Zero-point correction=                   |                |            | 0.000000 (Hartree/Particle) |
| Thermal correction to Energy=            |                |            | 0.001416                    |
| Thermal correction to Enthalpy=          |                |            | 0.002360                    |
| Thermal correction to Gibbs Free Energy= |                |            | -0.016848                   |
| SCF Done: E(RM062X) =                    | -297.803692692 |            |                             |

### IM6b

|   |             |             |             |
|---|-------------|-------------|-------------|
| C | -0.31869100 | 1.67857600  | 0.24335100  |
| C | -0.49454600 | 0.77663300  | 1.29541300  |
| C | -1.68075600 | 0.73065100  | 2.03205100  |
| C | -2.67107200 | 1.62569700  | 1.66483200  |
| C | -2.49151300 | 2.53559100  | 0.60227200  |
| C | -1.31699300 | 2.57994300  | -0.12945600 |
| H | -1.82738500 | 0.01896100  | 2.83680600  |
| H | -3.61586900 | 1.61601700  | 2.19786400  |
| H | -3.30204500 | 3.20843100  | 0.34262000  |
| H | -1.18844600 | 3.26204100  | -0.96208800 |
| N | 0.67094200  | 0.02420900  | 1.37616100  |
| N | 0.94327900  | 1.43679900  | -0.28618900 |
| C | 0.84407500  | -1.18702700 | 2.16615200  |
| H | 0.75839700  | -2.04418700 | 1.49386200  |
| H | 1.81384500  | -1.17072800 | 2.66509000  |
| C | 1.47032200  | 2.04171200  | -1.50510100 |
| H | 2.54511700  | 2.19356000  | -1.40436700 |
| H | 1.22264700  | 1.37691500  | -2.33574200 |
| C | 1.47868100  | 0.42390200  | 0.39248700  |

|                                          |                |             |                             |
|------------------------------------------|----------------|-------------|-----------------------------|
| H                                        | 0.98997500     | 3.01057800  | -1.63632700                 |
| H                                        | 0.05914600     | -1.21760800 | 2.92012600                  |
| I                                        | 3.32491300     | -0.43646400 | -0.02489000                 |
| O                                        | 0.12455400     | -1.52357300 | -0.93332000                 |
| C                                        | -0.76401900    | -0.83111000 | -1.49086900                 |
| C                                        | -2.19203800    | -1.01581700 | -0.96210700                 |
| O                                        | -0.61463000    | 0.01414900  | -2.40401000                 |
| C                                        | -2.46858800    | -1.97073700 | 0.01977700                  |
| C                                        | -3.22803300    | -0.20362800 | -1.42507400                 |
| C                                        | -3.75554200    | -2.10966900 | 0.53430400                  |
| H                                        | -1.65434300    | -2.59811100 | 0.37052100                  |
| C                                        | -4.51763600    | -0.33349900 | -0.91125100                 |
| H                                        | -2.99759000    | 0.53392700  | -2.18763900                 |
| C                                        | -4.78346000    | -1.28615200 | 0.07200400                  |
| H                                        | -3.96038800    | -2.85710400 | 1.29617600                  |
| H                                        | -5.31600100    | 0.30770300  | -1.27527100                 |
| H                                        | -5.78754000    | -1.38986900 | 0.47364300                  |
| Zero-point correction=                   |                |             | 0.284872 (Hartree/Particle) |
| Thermal correction to Energy=            |                |             | 0.304389                    |
| Thermal correction to Enthalpy=          |                |             | 0.305333                    |
| Thermal correction to Gibbs Free Energy= |                |             | 0.234189                    |
| SCF Done: E(RM062X) =                    | -1176.23183226 |             |                             |

### IM7b

|   |             |             |             |
|---|-------------|-------------|-------------|
| C | -2.68177200 | -0.64519900 | -0.23381700 |
| C | -2.76403900 | 0.71944600  | 0.06160300  |
| C | -3.98016800 | 1.34234200  | 0.33285900  |
| C | -5.10548300 | 0.53206100  | 0.29734000  |
| C | -5.02205600 | -0.84246800 | 0.00353700  |
| C | -3.81032300 | -1.46134100 | -0.26696500 |
| H | -4.03805400 | 2.40091500  | 0.56153500  |
| H | -6.07680900 | 0.96892700  | 0.50322100  |
| H | -5.93105000 | -1.43425600 | -0.00957900 |
| H | -3.74087500 | -2.52059500 | -0.48931100 |
| N | -1.46461800 | 1.21811300  | 0.02294700  |
| N | -1.33715300 | -0.92669300 | -0.45906500 |
| C | -1.06453200 | 2.59668700  | 0.29008900  |
| H | 0.01528900  | 2.67501900  | 0.17205800  |
| H | -1.56396200 | 3.25519000  | -0.42195900 |
| C | -0.77886200 | -2.22835600 | -0.80946800 |
| H | -1.44427400 | -2.69600900 | -1.53535600 |
| H | 0.20156800  | -2.08446200 | -1.26418600 |
| C | -0.65706700 | 0.20561800  | -0.28790200 |

|                                          |                |             |                             |
|------------------------------------------|----------------|-------------|-----------------------------|
| H                                        | -0.69535700    | -2.84579000 | 0.08611000                  |
| H                                        | -1.34776900    | 2.85546300  | 1.31134600                  |
| O                                        | 0.65513800     | 0.34613600  | -0.45319500                 |
| C                                        | 1.48756700     | -0.31892500 | 0.48161500                  |
| O                                        | 0.99861200     | -0.95259500 | 1.36938700                  |
| C                                        | 2.90869300     | -0.10322800 | 0.18104800                  |
| C                                        | 3.83500500     | -0.69114100 | 1.05053200                  |
| C                                        | 3.33421700     | 0.65020200  | -0.91854200                 |
| C                                        | 5.19310500     | -0.52294900 | 0.81741700                  |
| H                                        | 3.48050700     | -1.27148200 | 1.89638700                  |
| C                                        | 4.69623800     | 0.81141100  | -1.14312700                 |
| H                                        | 2.61212200     | 1.10193400  | -1.58970600                 |
| C                                        | 5.62165500     | 0.22767400  | -0.27812300                 |
| H                                        | 5.91716700     | -0.97500200 | 1.48705100                  |
| H                                        | 5.03665900     | 1.39290600  | -1.99341100                 |
| H                                        | 6.68416500     | 0.35796000  | -0.45949100                 |
| Zero-point correction=                   |                |             | 0.286413 (Hartree/Particle) |
| Thermal correction to Energy=            |                |             | 0.303423                    |
| Thermal correction to Enthalpy=          |                |             | 0.304367                    |
| Thermal correction to Gibbs Free Energy= |                |             | 0.240394                    |
| SCF Done: E(RM062X) =                    | -878.451609132 |             |                             |

### **BnNH<sub>2</sub>**

|                                 |             |             |                             |
|---------------------------------|-------------|-------------|-----------------------------|
| C                               | -2.31524300 | -0.31122500 | -0.07022700                 |
| C                               | -1.38719400 | -1.34328700 | 0.05318000                  |
| C                               | -0.02560600 | -1.05787100 | 0.14230300                  |
| C                               | 0.42792000  | 0.26294500  | 0.10683800                  |
| C                               | -0.51005800 | 1.29145500  | -0.02464900                 |
| C                               | -1.87149500 | 1.00993500  | -0.10780700                 |
| H                               | -3.37586200 | -0.53408100 | -0.14028800                 |
| H                               | -1.72338100 | -2.37604700 | 0.07990200                  |
| H                               | 0.70004100  | -1.85975900 | 0.23531700                  |
| H                               | -0.16758800 | 2.32335300  | -0.06427400                 |
| H                               | -2.58597000 | 1.82187900  | -0.20953500                 |
| C                               | 1.90057600  | 0.59395800  | 0.23512000                  |
| H                               | 2.13371700  | 0.76364500  | 1.29387100                  |
| H                               | 2.08764100  | 1.54914700  | -0.27937200                 |
| N                               | 2.75001700  | -0.50232000 | -0.22984900                 |
| H                               | 2.64330900  | -0.59684900 | -1.23924600                 |
| H                               | 3.72457800  | -0.25051400 | -0.07598100                 |
| Zero-point correction=          |             |             | 0.147830 (Hartree/Particle) |
| Thermal correction to Energy=   |             |             | 0.154976                    |
| Thermal correction to Enthalpy= |             |             | 0.155921                    |

Thermal correction to Gibbs Free Energy= 0.115578

SCF Done: E(RM062X) = -326.863190534

**TS4b**

|   |             |             |             |
|---|-------------|-------------|-------------|
| C | -0.16750800 | 1.43656000  | 0.57072700  |
| O | 0.44566300  | 1.45576100  | 1.61042800  |
| N | -1.47465600 | -0.07674200 | 0.77854500  |
| H | -0.88354400 | -0.88511200 | 0.98972800  |
| H | -1.96987300 | 0.14992100  | 1.64361700  |
| C | -1.11269100 | 2.48333500  | 0.07952700  |
| C | -1.44773600 | 2.63241400  | -1.26796000 |
| C | -2.34615200 | 3.62755900  | -1.64528700 |
| C | -2.90782800 | 4.46629400  | -0.68439200 |
| C | -2.56891200 | 4.31561800  | 0.66012900  |
| C | -1.67030700 | 3.32581000  | 1.04373600  |
| H | -1.00708900 | 1.98281900  | -2.01657900 |
| H | -2.60507700 | 3.74828900  | -2.69249900 |
| H | -3.60745300 | 5.24058200  | -0.98384700 |
| H | -3.00100500 | 4.97257400  | 1.40836000  |
| H | -1.38887800 | 3.20067900  | 2.08491500  |
| C | -2.42864600 | -0.39332200 | -0.29858800 |
| H | -3.15163300 | 0.42631200  | -0.33899400 |
| H | -1.87528900 | -0.39422500 | -1.24364800 |
| C | -3.12118900 | -1.72086300 | -0.09562700 |
| C | -2.75998600 | -2.83496900 | -0.85549500 |
| C | -4.10282900 | -1.85925100 | 0.89112600  |
| C | -3.37185100 | -4.06909000 | -0.63767300 |
| H | -2.00083100 | -2.73246700 | -1.62826000 |
| C | -4.71328000 | -3.09003500 | 1.11207400  |
| H | -4.39184800 | -0.99372900 | 1.48387900  |
| C | -4.34810700 | -4.19849500 | 0.34709100  |
| H | -3.08726200 | -4.92745800 | -1.23891100 |
| H | -5.47813100 | -3.18503600 | 1.87705200  |
| H | -4.82750800 | -5.15785100 | 0.51650600  |
| C | 3.26421600  | -1.25753900 | -0.23764200 |
| C | 3.80865200  | -0.00964300 | 0.08332100  |
| C | 5.14966600  | 0.13939600  | 0.42662400  |
| C | 5.91817200  | -1.01689200 | 0.43084400  |
| C | 5.37059200  | -2.27157800 | 0.10725700  |
| C | 4.03316100  | -2.41837800 | -0.23535600 |
| H | 5.56670300  | 1.10838800  | 0.67874900  |
| H | 6.96873200  | -0.95116300 | 0.69324100  |
| H | 6.00995700  | -3.14771300 | 0.12722600  |

|                                          |                |             |                             |
|------------------------------------------|----------------|-------------|-----------------------------|
| H                                        | 3.60451100     | -3.38379700 | -0.48222600                 |
| N                                        | 2.77888000     | 0.91903100  | -0.02878200                 |
| N                                        | 1.92007800     | -1.04492900 | -0.52500200                 |
| C                                        | 2.89651000     | 2.35531900  | 0.19196400                  |
| H                                        | 2.04918100     | 2.85394700  | -0.27878600                 |
| H                                        | 2.90468000     | 2.56549400  | 1.26205400                  |
| C                                        | 0.96232000     | -2.06434400 | -0.93360800                 |
| H                                        | 0.71388200     | -2.70213200 | -0.08262900                 |
| H                                        | 0.06828400     | -1.56875300 | -1.31119700                 |
| C                                        | 1.66923600     | 0.26352900  | -0.38526500                 |
| H                                        | 1.40776500     | -2.66164800 | -1.73091600                 |
| H                                        | 3.82167500     | 2.69624800  | -0.27460800                 |
| O                                        | 0.49895200     | 0.80870300  | -0.61551700                 |
| Zero-point correction=                   |                |             | 0.436966 (Hartree/Particle) |
| Thermal correction to Energy=            |                |             | 0.460919                    |
| Thermal correction to Enthalpy=          |                |             | 0.461863                    |
| Thermal correction to Gibbs Free Energy= |                |             | 0.382384                    |
| SCF Done: E(RM062X) =                    | -1205.31723815 |             |                             |

### 1,3-dimethylbenzimidazol-2-one

|                        |             |             |                             |
|------------------------|-------------|-------------|-----------------------------|
| C                      | 0.00000000  | -0.46578200 | 0.70331800                  |
| C                      | 0.00000000  | -0.46578200 | -0.70331800                 |
| C                      | 0.00000000  | -1.64845700 | -1.42585600                 |
| C                      | 0.00000000  | -2.84373200 | -0.69814200                 |
| C                      | 0.00000000  | -2.84373200 | 0.69814200                  |
| C                      | 0.00000000  | -1.64845700 | 1.42585600                  |
| H                      | 0.00000000  | -1.64461600 | -2.51141700                 |
| H                      | 0.00000000  | -3.78814000 | -1.23304300                 |
| H                      | 0.00000000  | -3.78814000 | 1.23304300                  |
| H                      | 0.00000000  | -1.64461600 | 2.51141700                  |
| N                      | 0.00000000  | 0.85941100  | -1.10619500                 |
| N                      | 0.00000000  | 0.85941100  | 1.10619500                  |
| C                      | 0.00000000  | 1.33621300  | -2.47020400                 |
| H                      | 0.00000000  | 2.42640000  | -2.43847200                 |
| H                      | 0.89245500  | 0.98850300  | -2.99848500                 |
| C                      | 0.00000000  | 1.33621300  | 2.47020400                  |
| H                      | 0.89245500  | 0.98850300  | 2.99848500                  |
| H                      | 0.00000000  | 2.42640000  | 2.43847200                  |
| C                      | 0.00000000  | 1.69371400  | 0.00000000                  |
| H                      | -0.89245500 | 0.98850200  | 2.99848500                  |
| H                      | -0.89245500 | 0.98850200  | -2.99848500                 |
| O                      | 0.00000000  | 2.91571800  | 0.00000000                  |
| Zero-point correction= |             |             | 0.181618 (Hartree/Particle) |

Thermal correction to Energy= 0.191941  
 Thermal correction to Enthalpy= 0.192885  
 Thermal correction to Gibbs Free Energy= 0.146047  
 SCF Done: E(RM062X) = -533.687648298

**IM8b**

|                                          |                |             |                             |
|------------------------------------------|----------------|-------------|-----------------------------|
| C                                        | 0.93220500     | 1.75935700  | -0.02135700                 |
| C                                        | 1.54006000     | 0.43318300  | -0.19197900                 |
| O                                        | 1.25489700     | 2.60873300  | 0.75749900                  |
| C                                        | 1.02598600     | -0.56859100 | -1.02688500                 |
| C                                        | 2.68545300     | 0.18777600  | 0.58140200                  |
| C                                        | 1.65681000     | -1.80543800 | -1.07940900                 |
| H                                        | 0.12926700     | -0.42444400 | -1.62118100                 |
| C                                        | 3.31171800     | -1.04758600 | 0.51639800                  |
| H                                        | 3.06949800     | 0.97223000  | 1.22511700                  |
| C                                        | 2.79638400     | -2.04459000 | -0.31294800                 |
| H                                        | 1.25416000     | -2.58442800 | -1.71790300                 |
| H                                        | 4.19830300     | -1.23661900 | 1.11228800                  |
| H                                        | 3.28367900     | -3.01344800 | -0.35986100                 |
| N                                        | -0.25393900    | 2.12481800  | -0.89400000                 |
| C                                        | -1.58148700    | 2.03998000  | -0.14574200                 |
| H                                        | -0.10565400    | 3.10465200  | -1.17621400                 |
| H                                        | -0.30835000    | 1.57477900  | -1.76109900                 |
| C                                        | -1.92845900    | 0.60674300  | 0.12942800                  |
| H                                        | -1.44552000    | 2.62995900  | 0.76190100                  |
| H                                        | -2.30801200    | 2.52767600  | -0.79690400                 |
| C                                        | -2.59780300    | -0.14291500 | -0.84173900                 |
| C                                        | -1.52737700    | -0.00068200 | 1.32131500                  |
| C                                        | -2.85327800    | -1.49435900 | -0.62623800                 |
| H                                        | -2.92025500    | 0.33516200  | -1.76396100                 |
| C                                        | -1.78469300    | -1.35208500 | 1.53677700                  |
| H                                        | -1.00907800    | 0.58640900  | 2.07657700                  |
| C                                        | -2.44334400    | -2.09900400 | 0.56178900                  |
| H                                        | -3.37613200    | -2.07345300 | -1.38091300                 |
| H                                        | -1.47190800    | -1.82046700 | 2.46450100                  |
| H                                        | -2.64463100    | -3.15233300 | 0.73077800                  |
| Zero-point correction=                   |                |             | 0.255205 (Hartree/Particle) |
| Thermal correction to Energy=            |                |             | 0.268021                    |
| Thermal correction to Enthalpy=          |                |             | 0.268966                    |
| Thermal correction to Gibbs Free Energy= |                |             | 0.214978                    |
| SCF Done: E(RM062X) =                    | -671.646558292 |             |                             |

**4aa**

|                                          |                |             |                             |
|------------------------------------------|----------------|-------------|-----------------------------|
| C                                        | -0.88548400    | -0.95644800 | -0.00124500                 |
| C                                        | -2.18111600    | -0.19433900 | -0.02738300                 |
| O                                        | -0.67985900    | -1.82991000 | 0.83790200                  |
| C                                        | -2.29107500    | 1.10141700  | -0.53930000                 |
| C                                        | -3.30376100    | -0.81611800 | 0.52478400                  |
| C                                        | -3.51878500    | 1.75868600  | -0.51566000                 |
| H                                        | -1.41923600    | 1.61906900  | -0.92984100                 |
| C                                        | -4.53133700    | -0.16268800 | 0.53813500                  |
| H                                        | -3.19730400    | -1.81422500 | 0.93778400                  |
| C                                        | -4.64056000    | 1.12609900  | 0.01635600                  |
| H                                        | -3.59596400    | 2.76897100  | -0.90553900                 |
| H                                        | -5.40235500    | -0.65548500 | 0.95920000                  |
| H                                        | -5.59732500    | 1.63939600  | 0.03122000                  |
| N                                        | 0.02008100     | -0.63088400 | -0.95413200                 |
| C                                        | 1.33000500     | -1.25804400 | -1.02615800                 |
| C                                        | 2.41884000     | -0.42359700 | -0.38364300                 |
| H                                        | 1.24512500     | -2.22244800 | -0.51843700                 |
| H                                        | 1.56974400     | -1.44483200 | -2.07624100                 |
| C                                        | 3.53721100     | -0.01895900 | -1.11108100                 |
| C                                        | 2.30929200     | -0.05214800 | 0.96107200                  |
| C                                        | 4.53731300     | 0.74456100  | -0.50762200                 |
| H                                        | 3.62605600     | -0.30214100 | -2.15735500                 |
| C                                        | 3.30340500     | 0.71141300  | 1.56405300                  |
| H                                        | 1.44070600     | -0.37354100 | 1.53159200                  |
| C                                        | 4.42156300     | 1.11181100  | 0.83002700                  |
| H                                        | 5.40350800     | 1.05384600  | -1.08530400                 |
| H                                        | 3.21029600     | 0.99229600  | 2.60914500                  |
| H                                        | 5.19790300     | 1.70699300  | 1.30158800                  |
| H                                        | -0.21590600    | 0.05768400  | -1.65612400                 |
| Zero-point correction=                   |                |             | 0.240268 (Hartree/Particle) |
| Thermal correction to Energy=            |                |             | 0.253540                    |
| Thermal correction to Enthalpy=          |                |             | 0.254484                    |
| Thermal correction to Gibbs Free Energy= |                |             | 0.196834                    |
| SCF Done: E(RM062X) =                    | -671.233378812 |             |                             |



## 12 $^1\text{H}$ NMR, $^{13}\text{C}$ NMR, and HPLC Spectrums

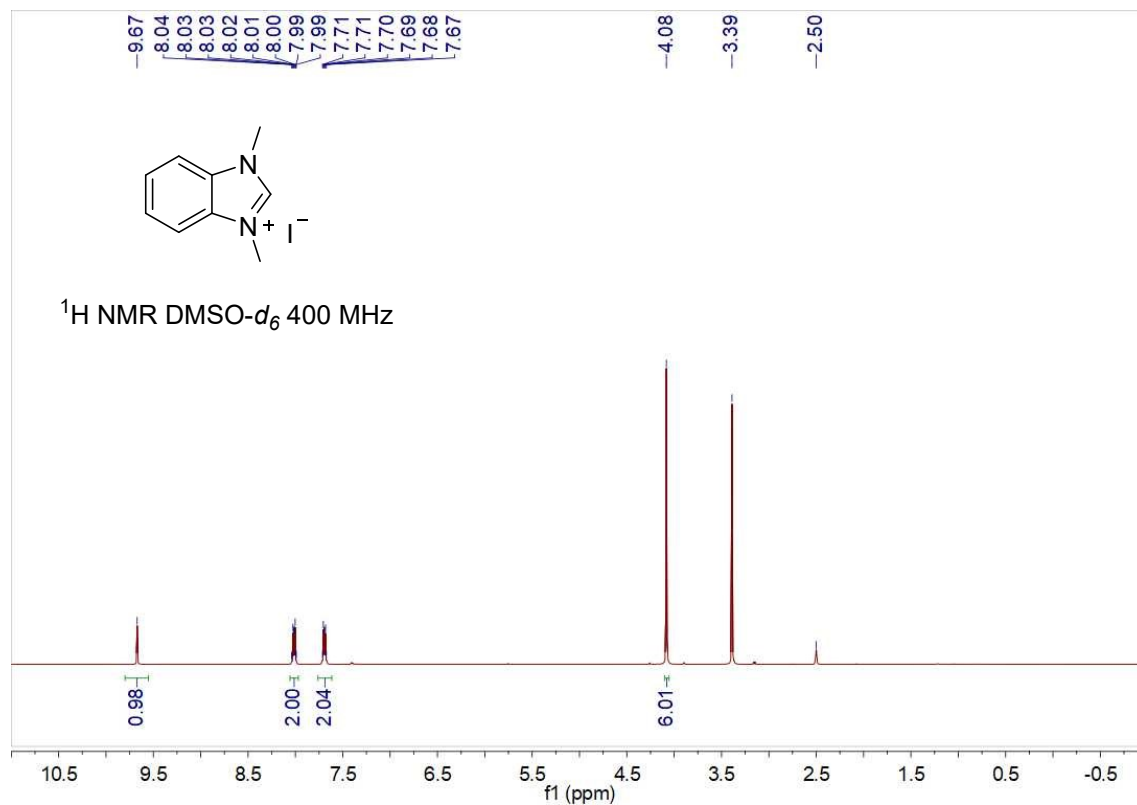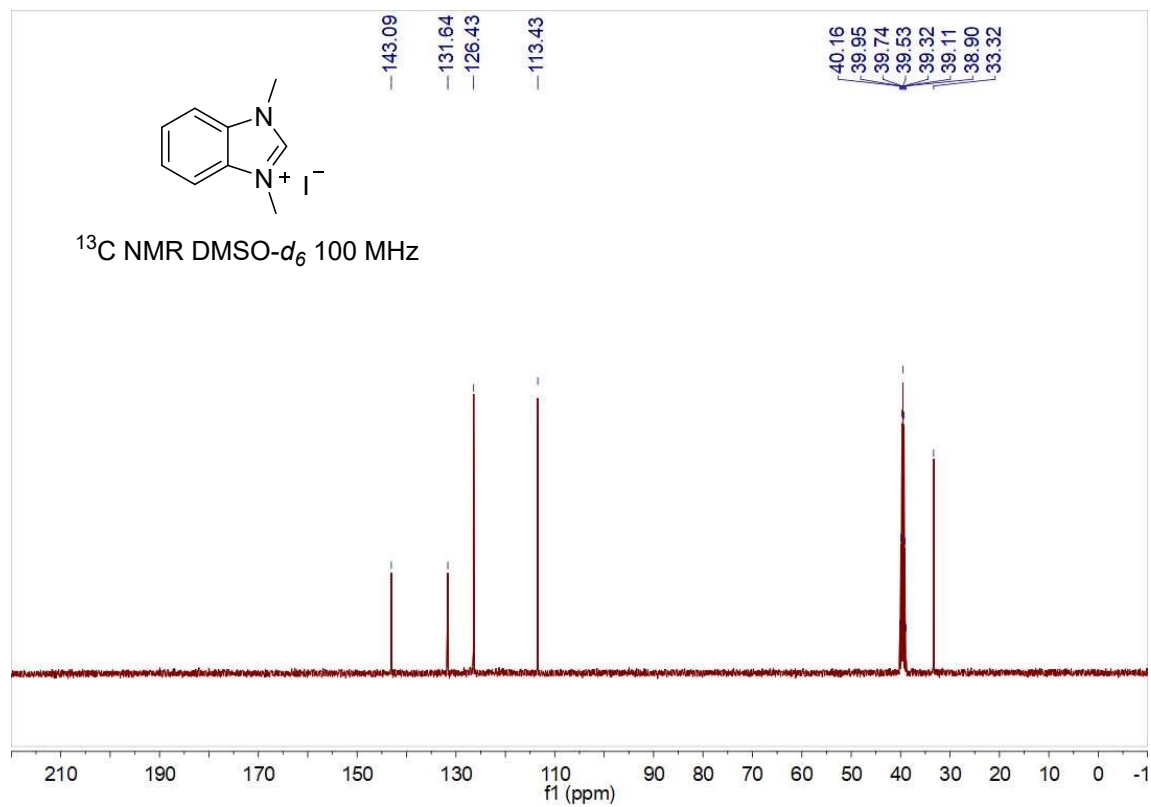

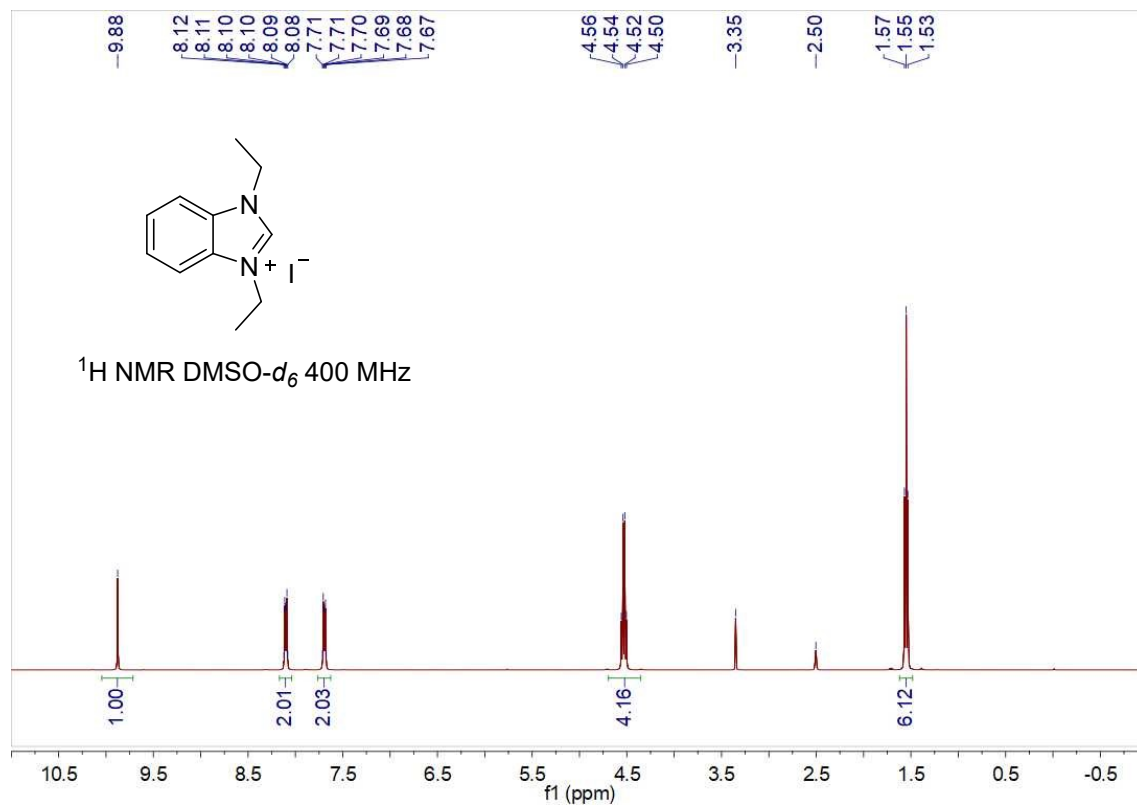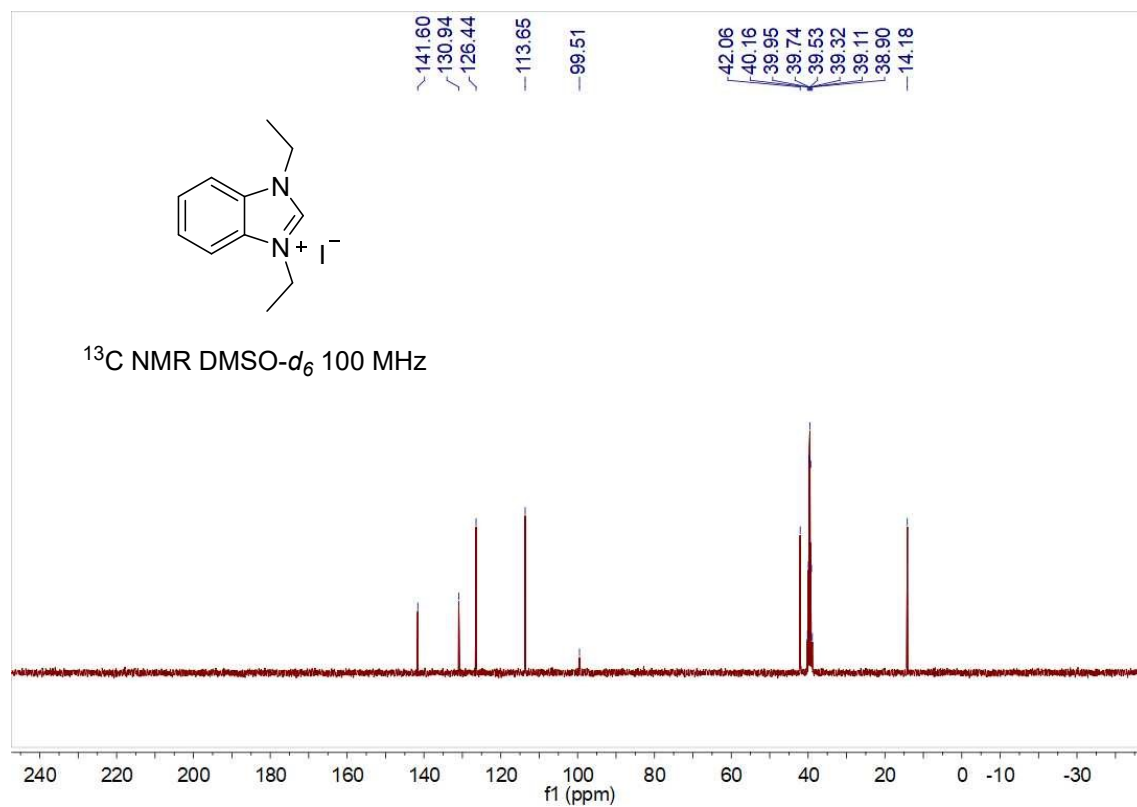

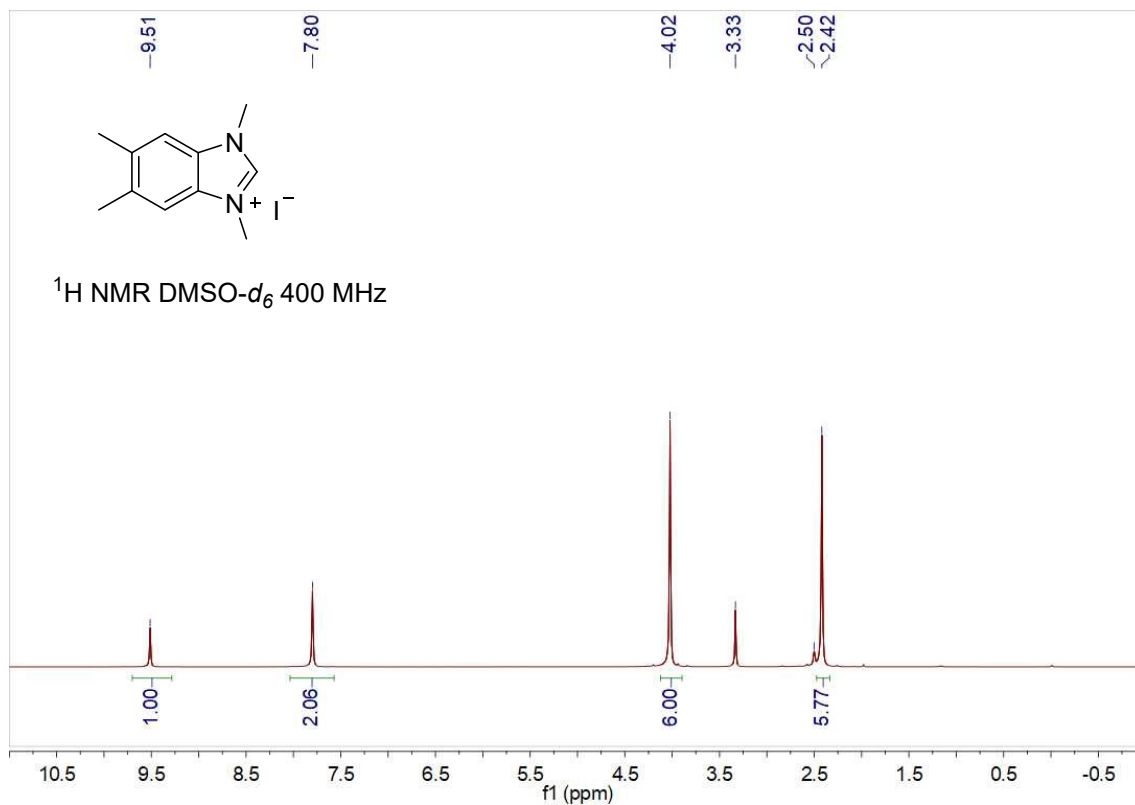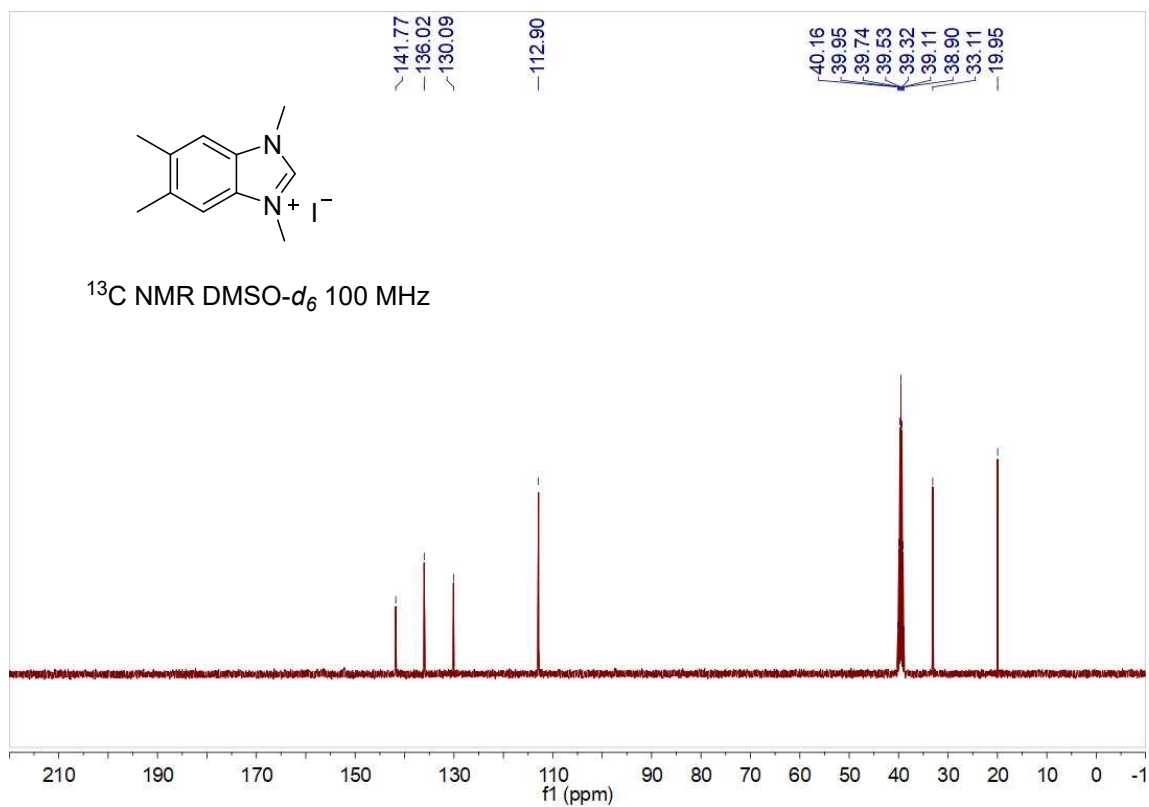

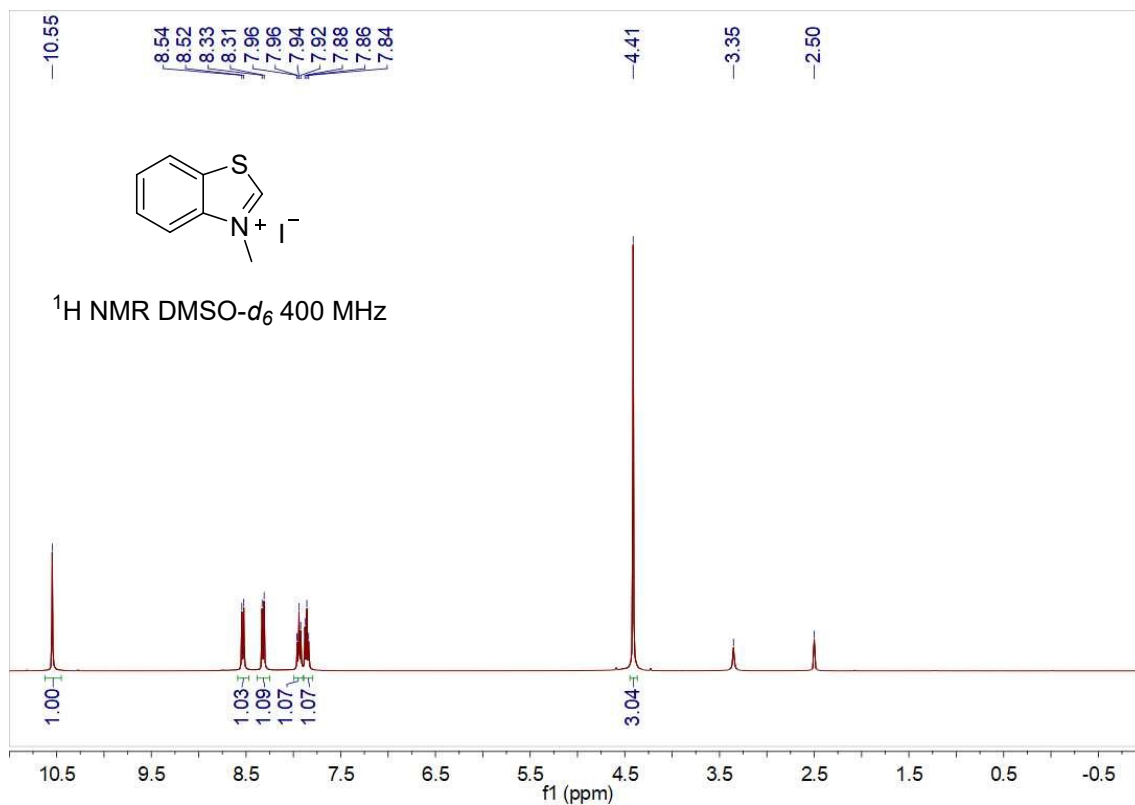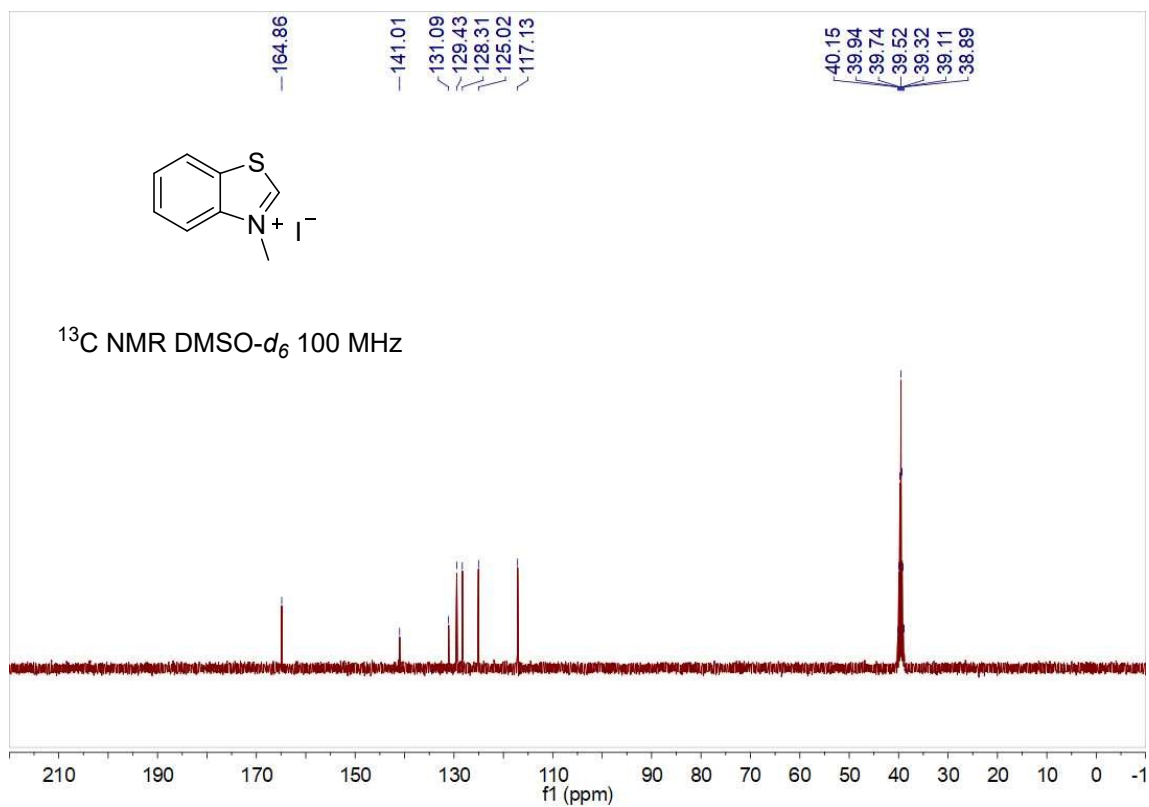

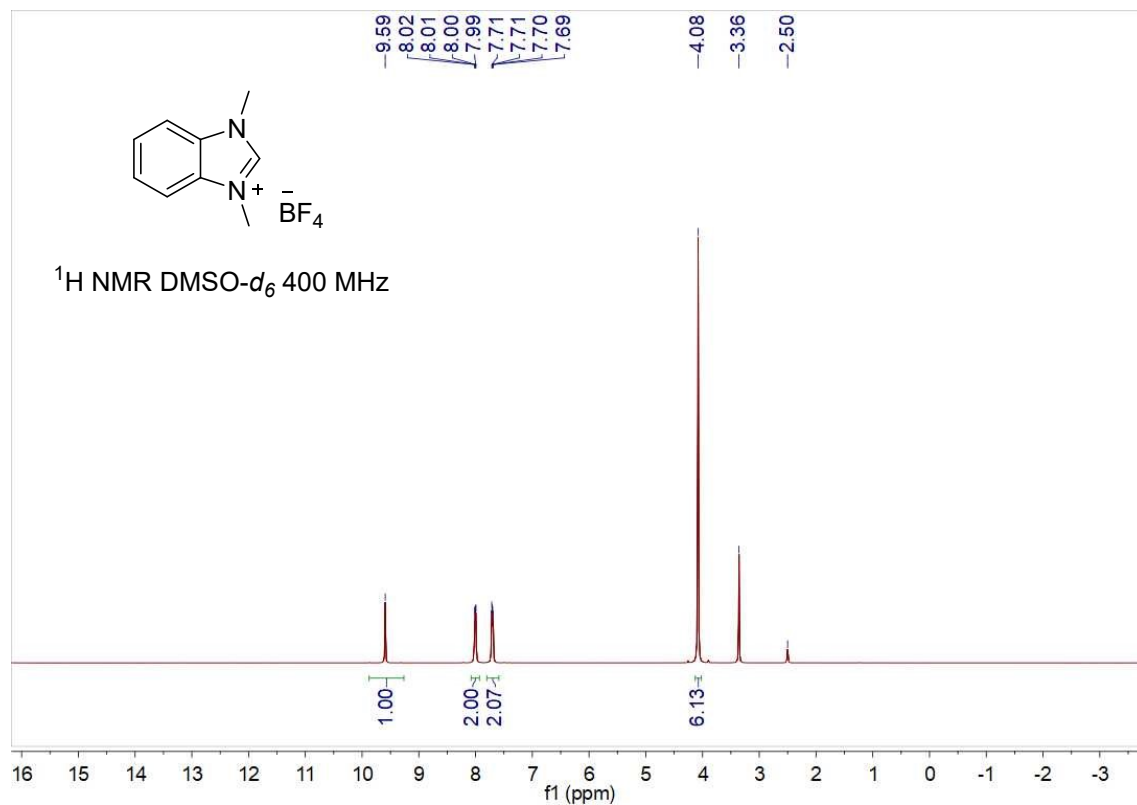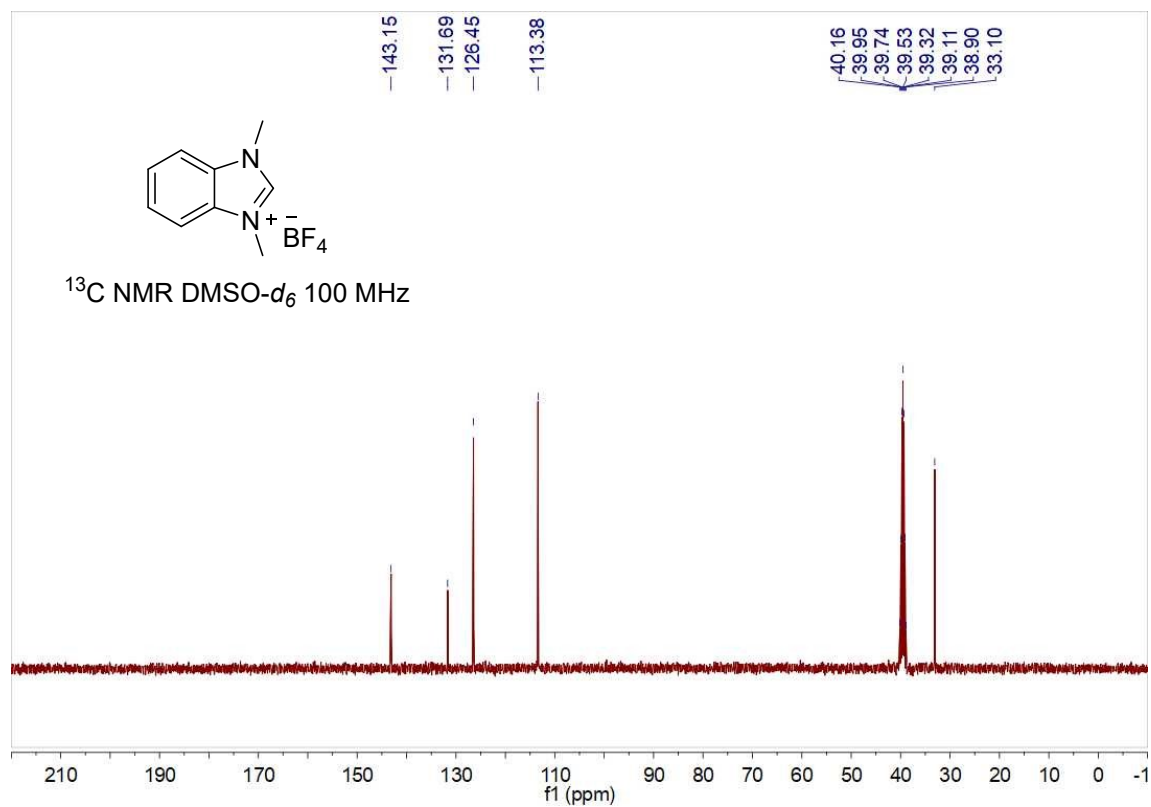

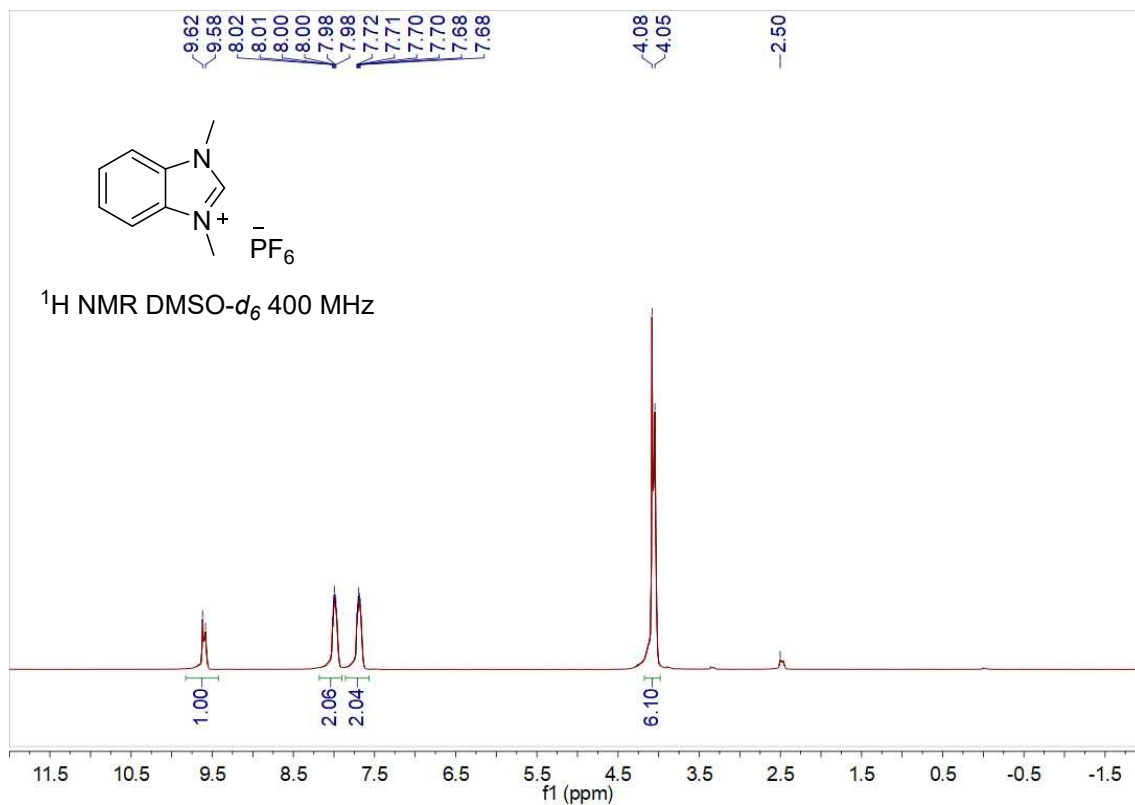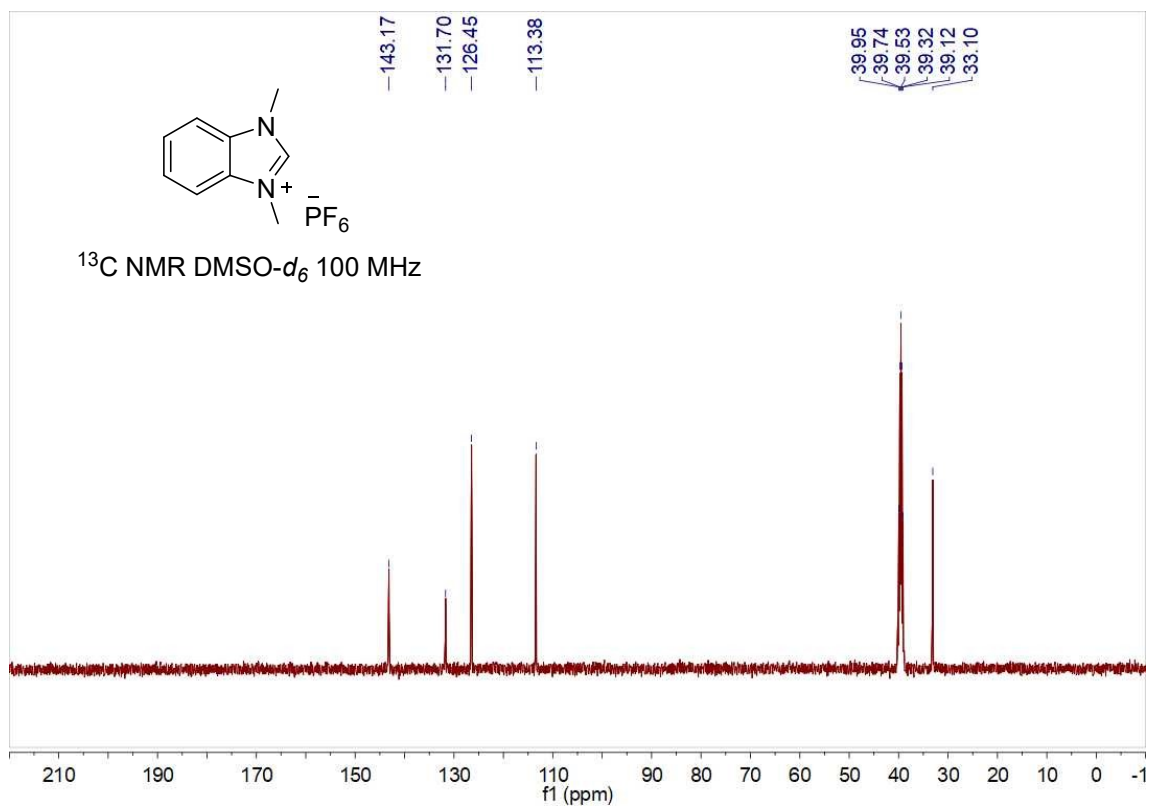

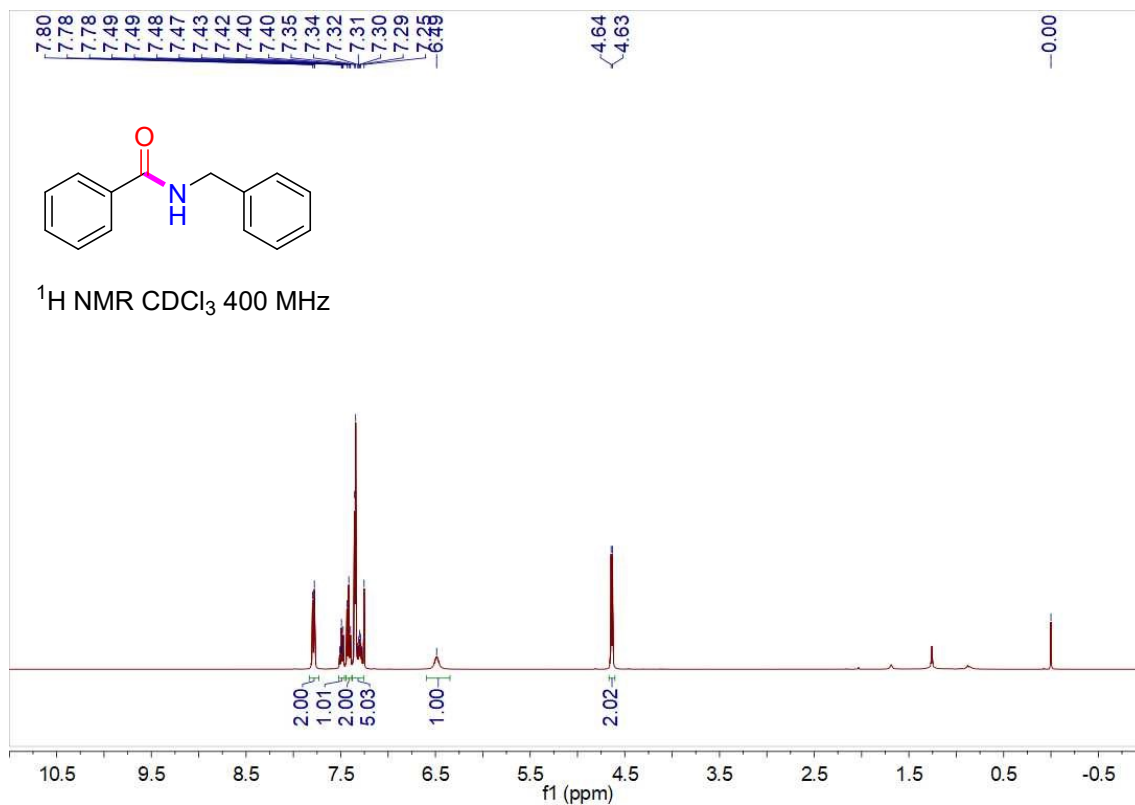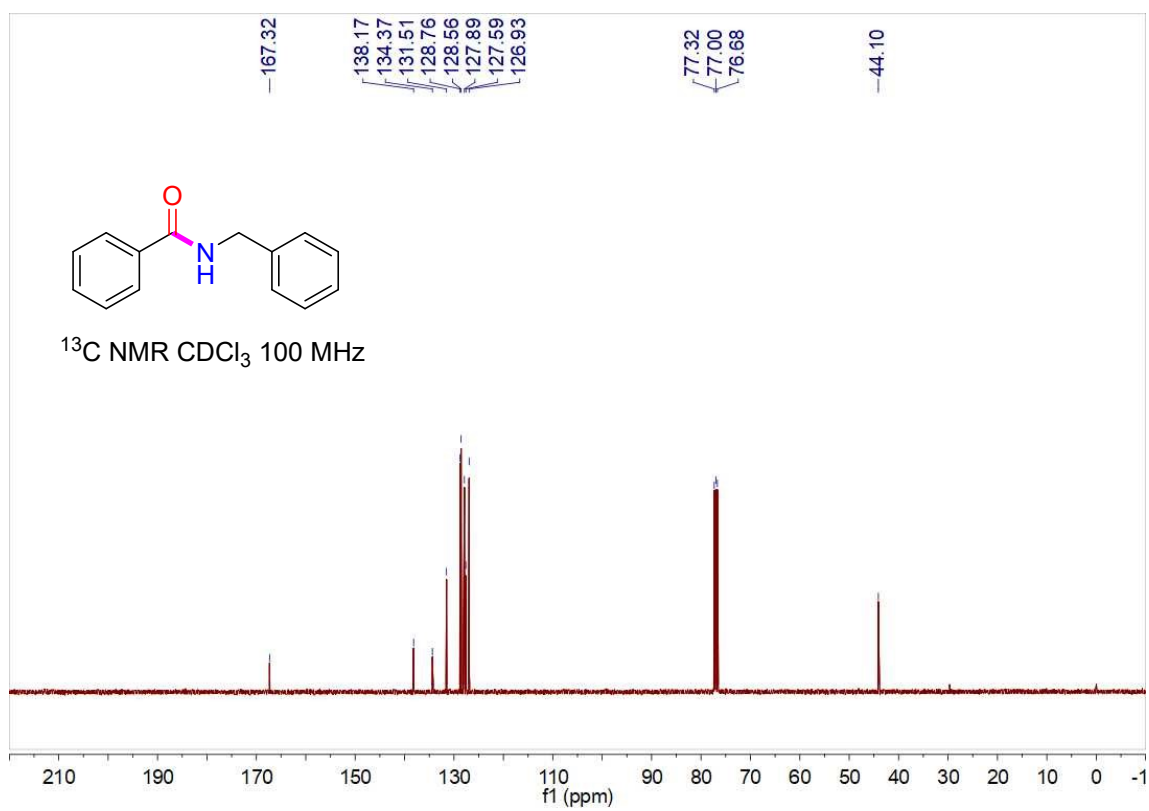

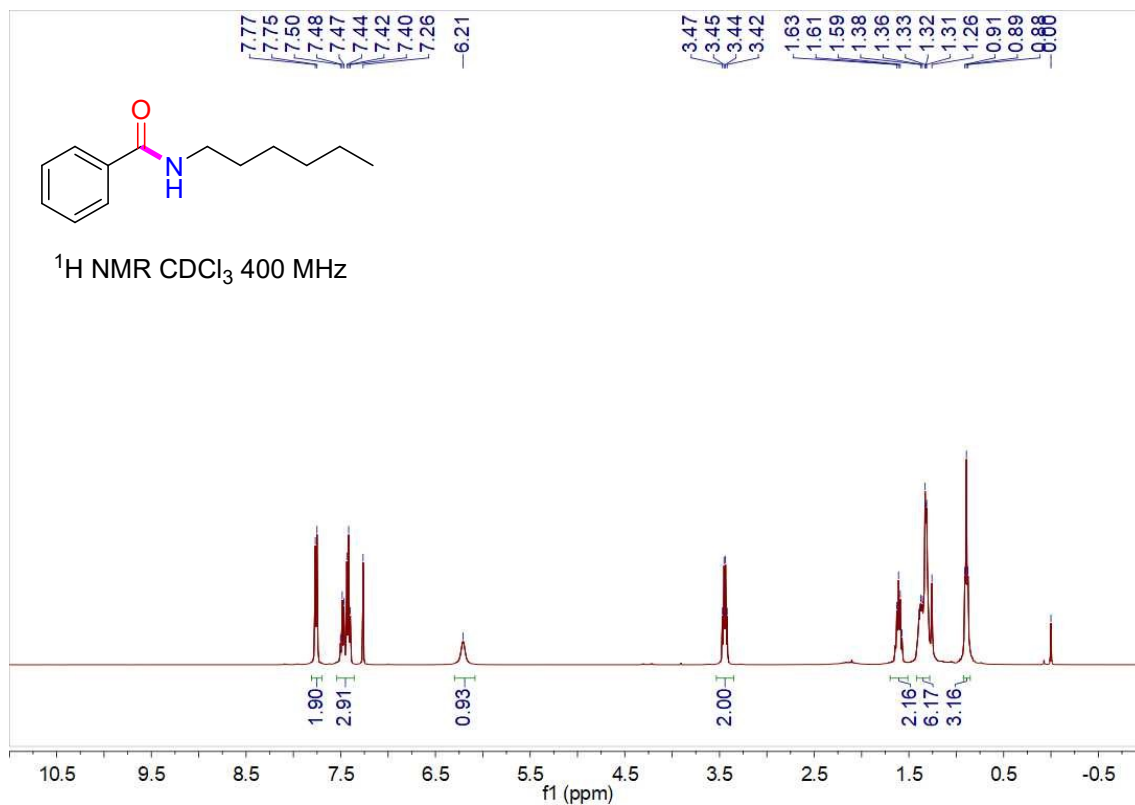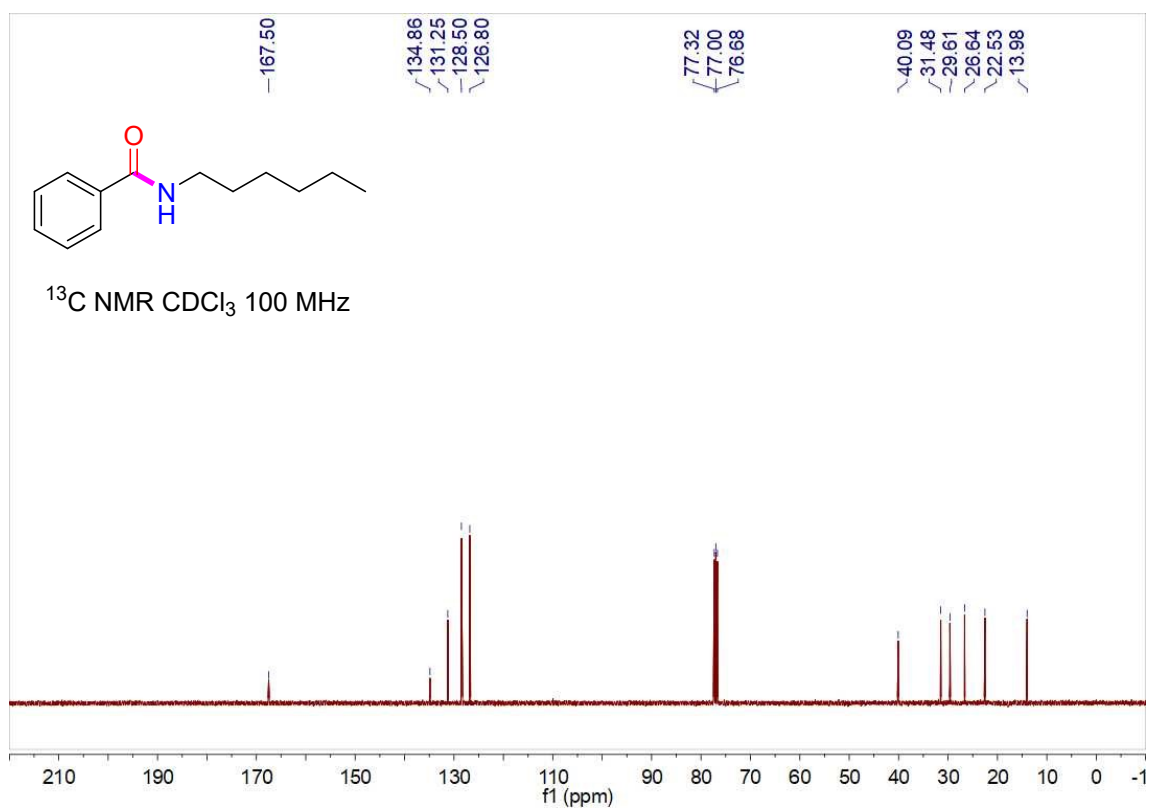



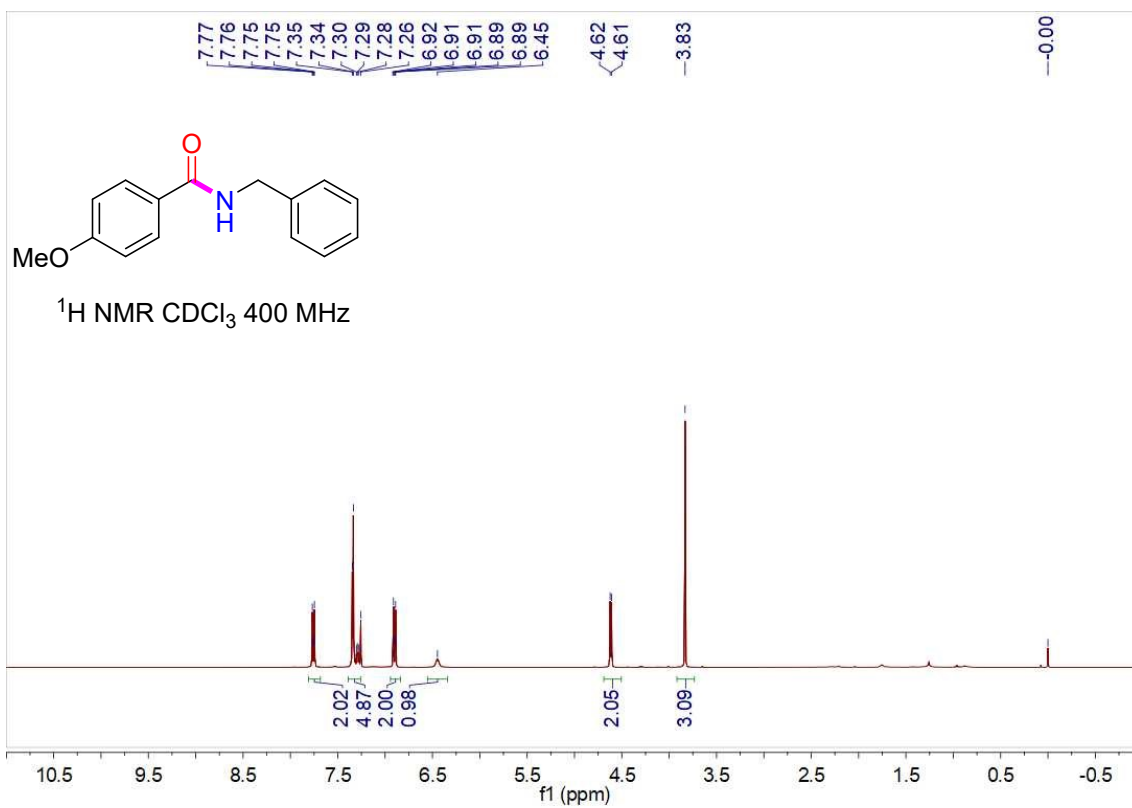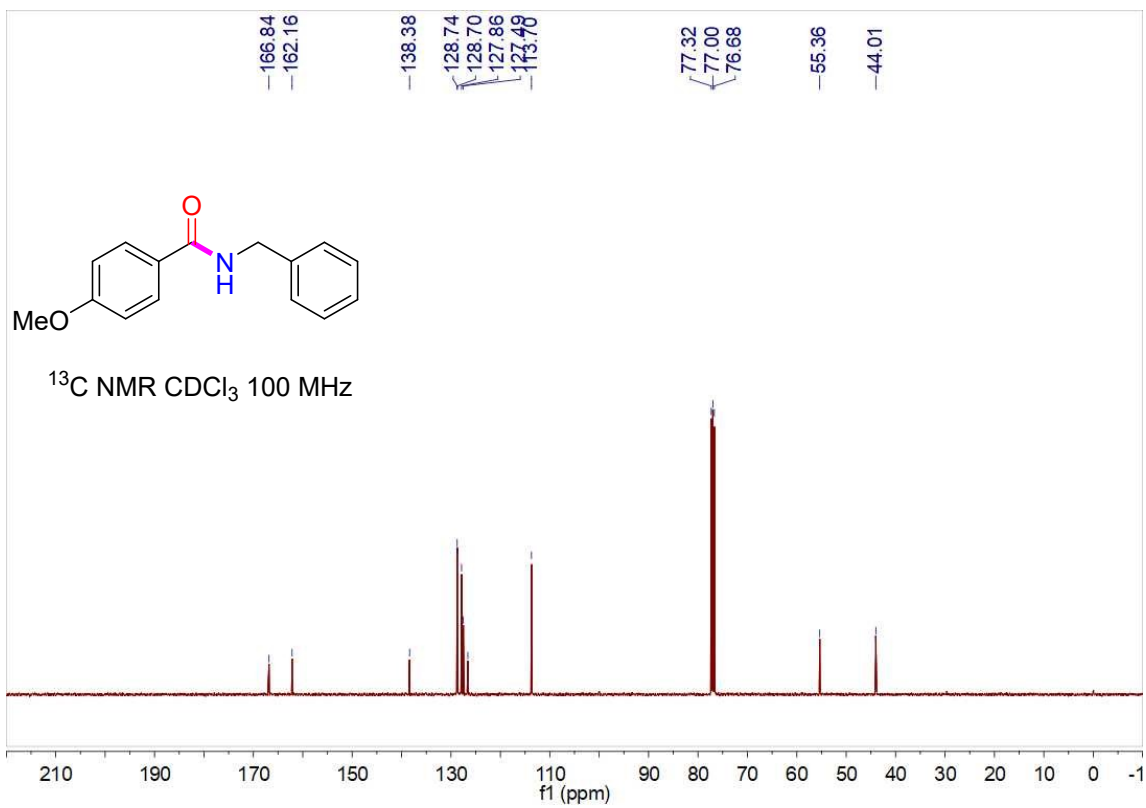

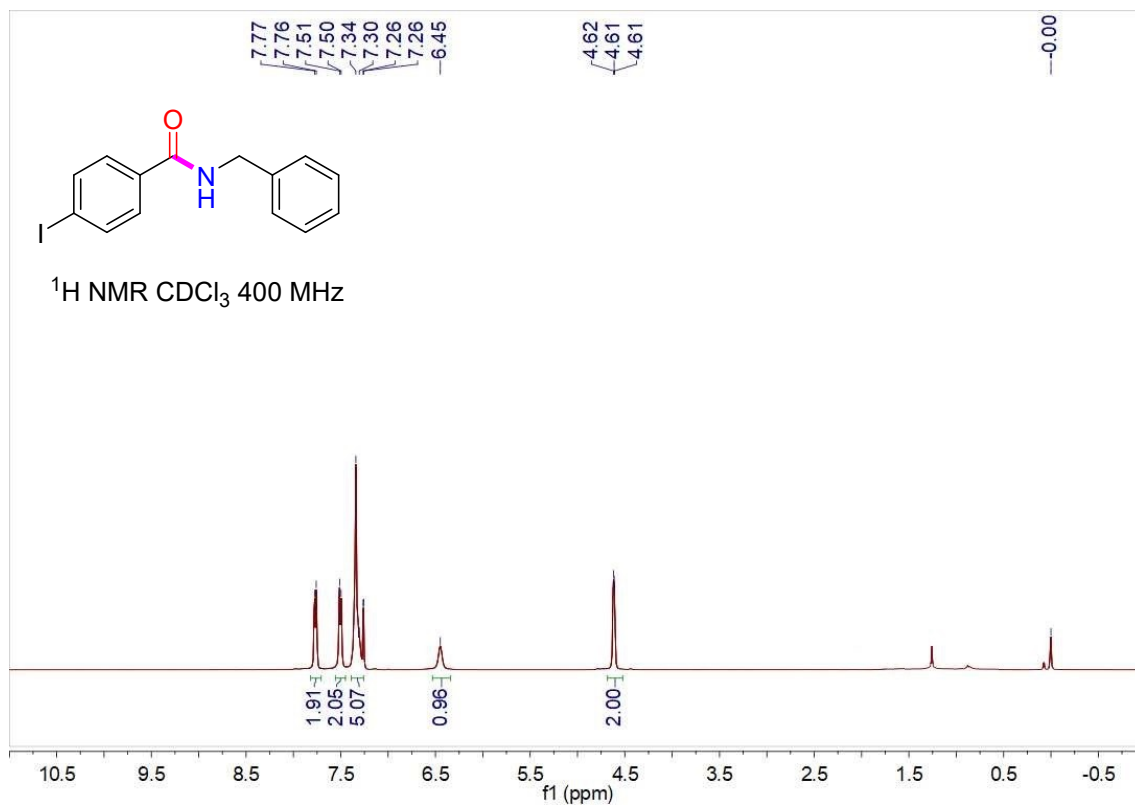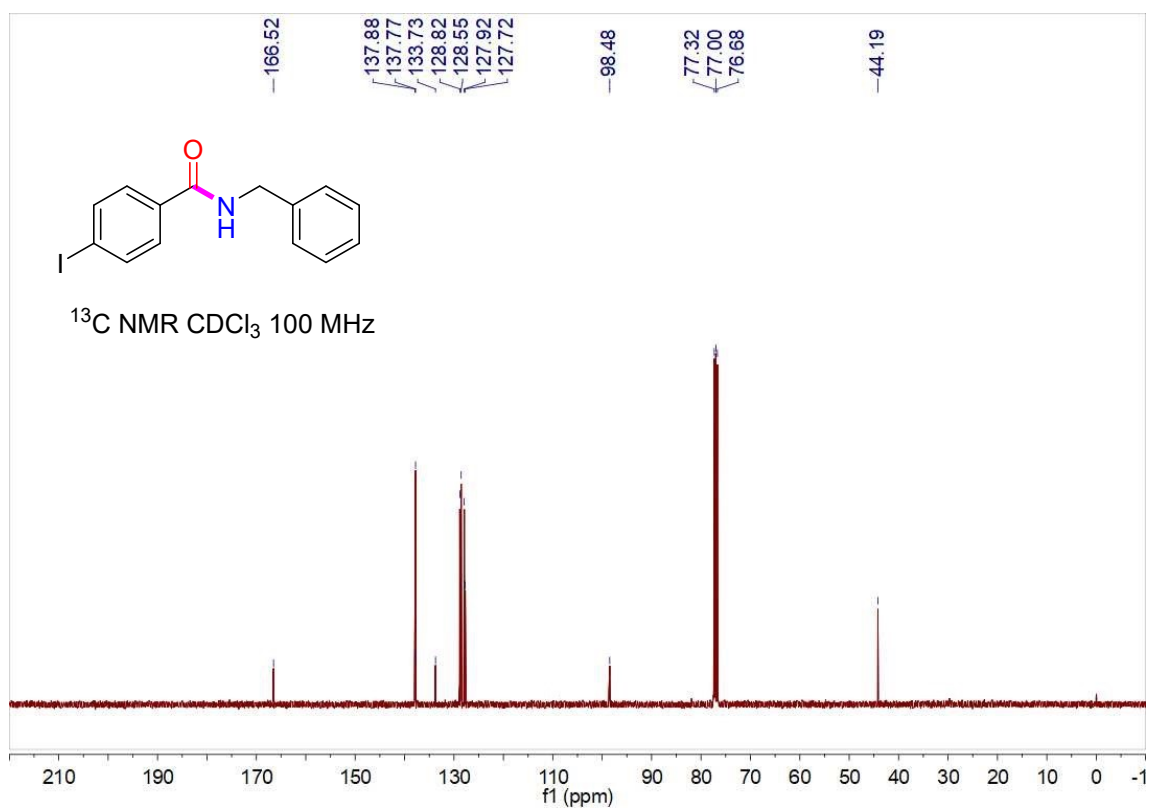

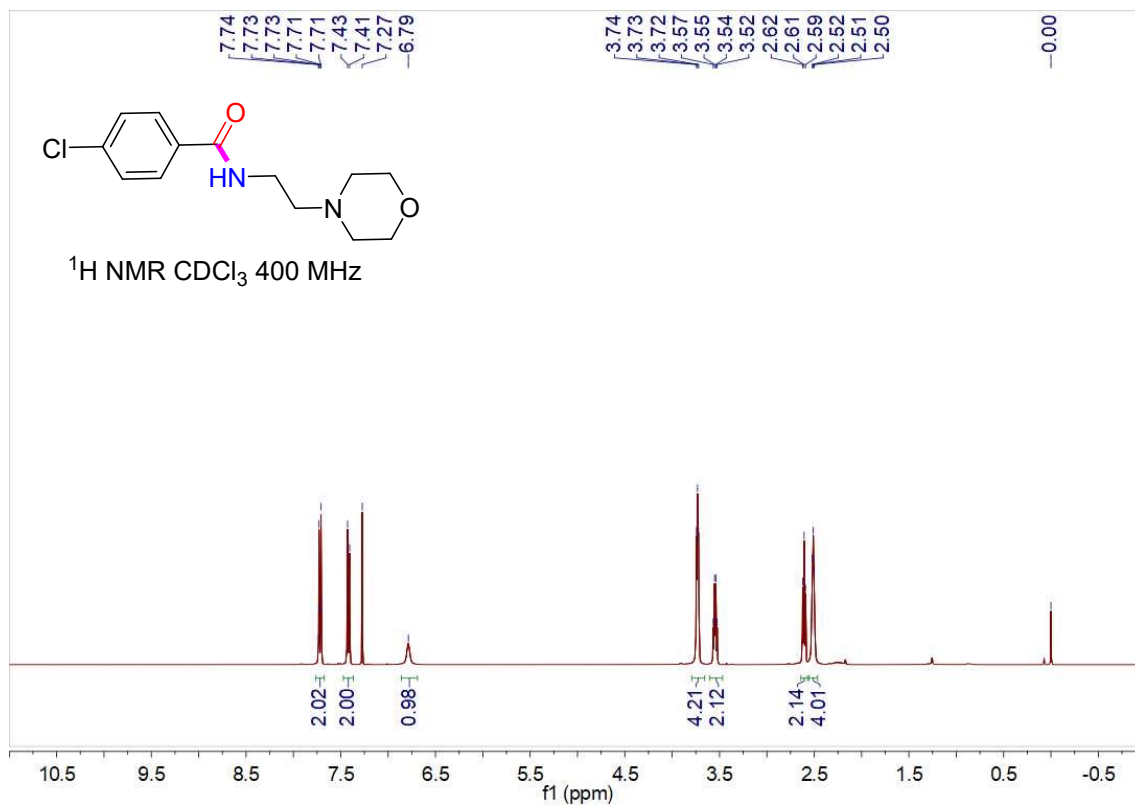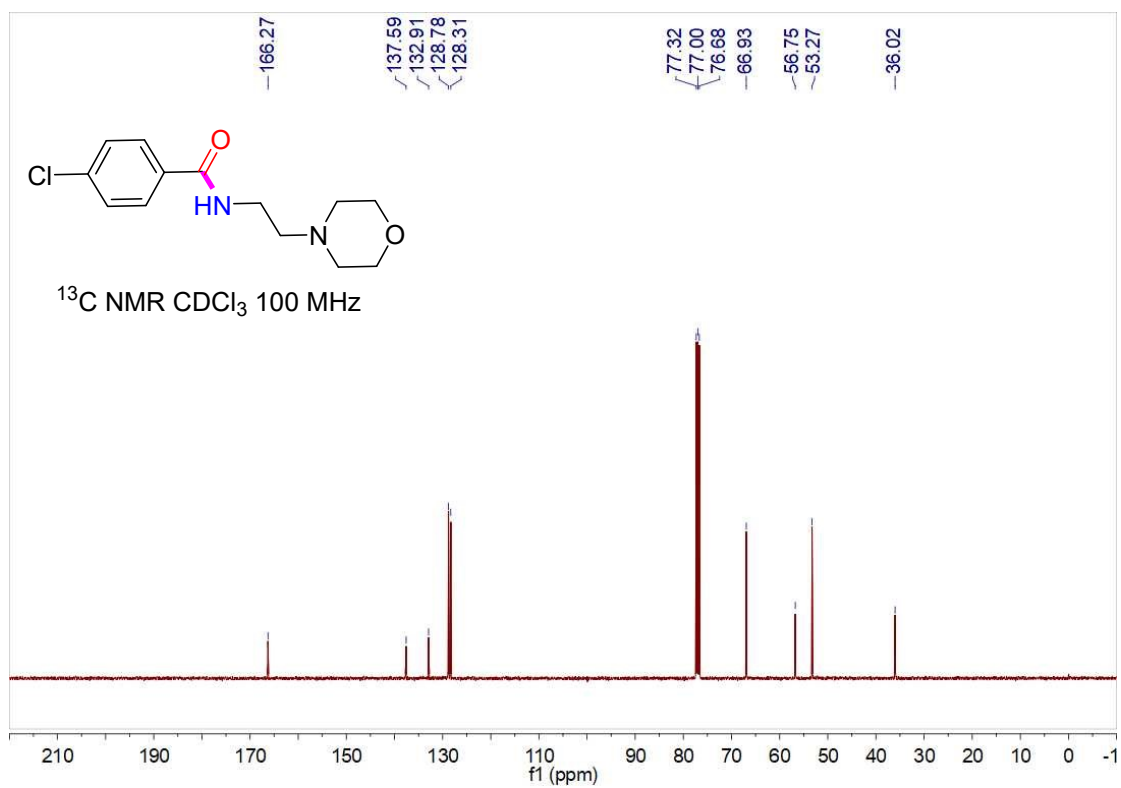

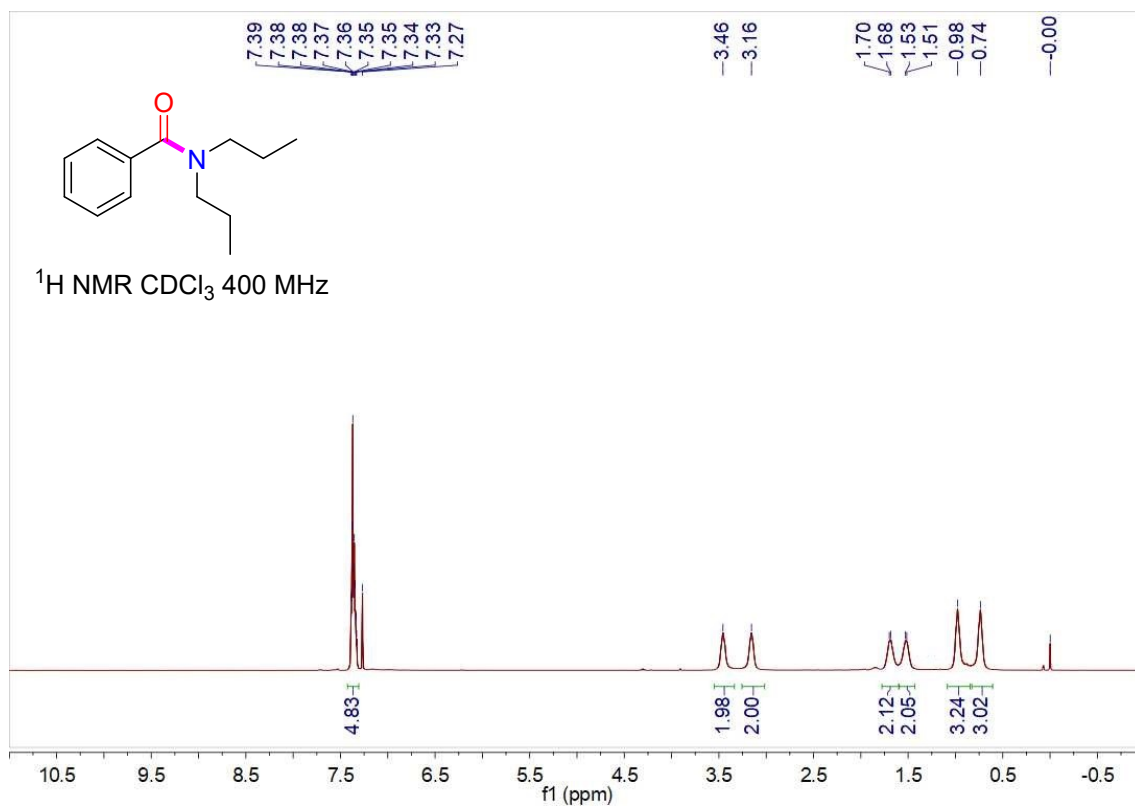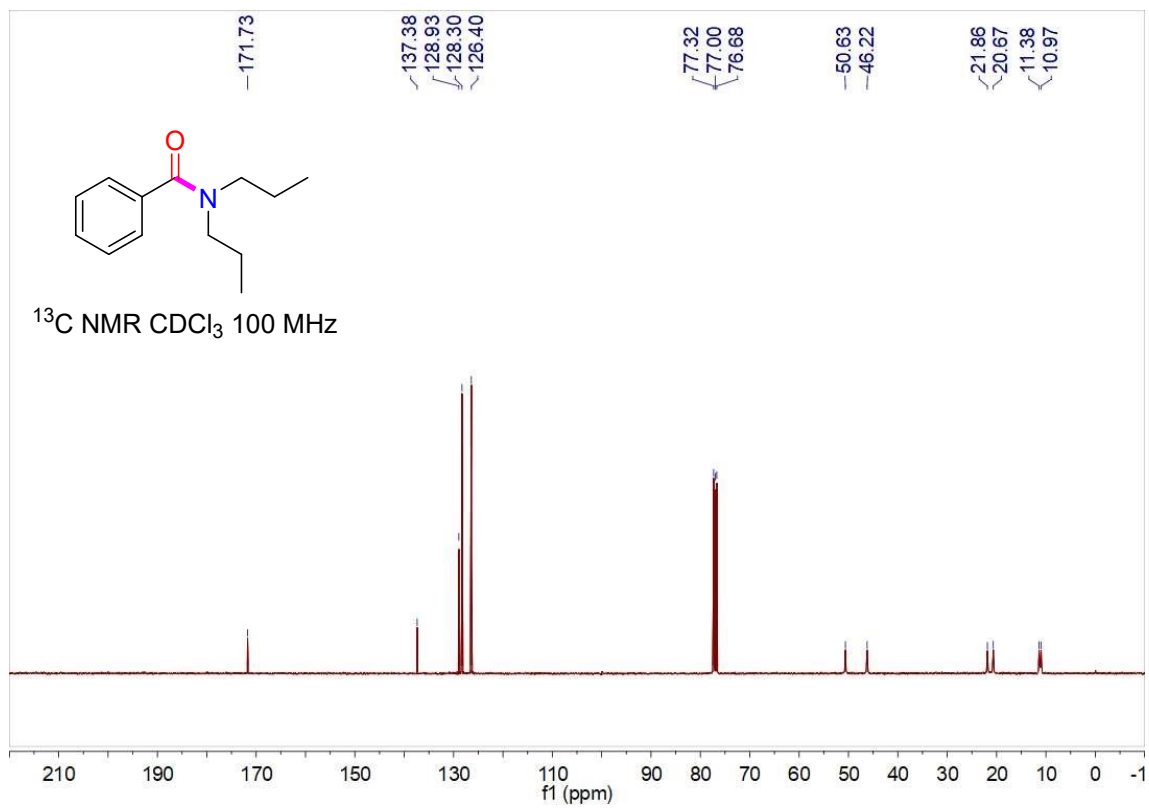

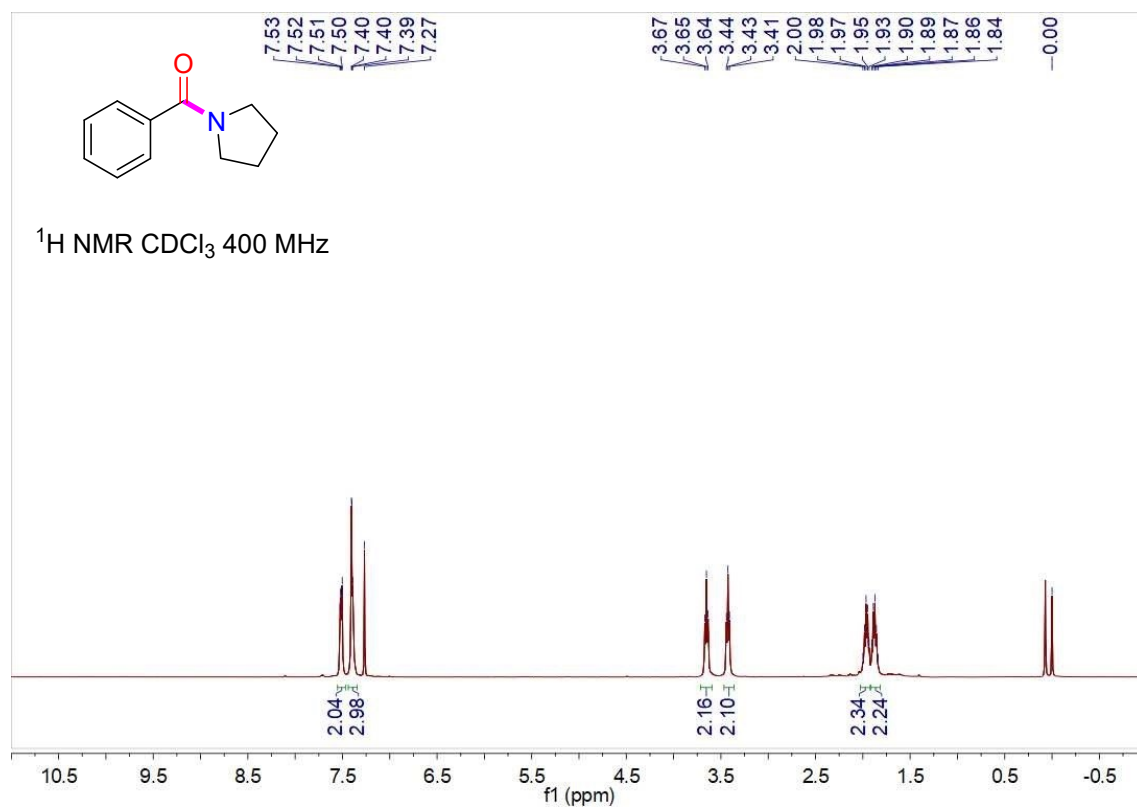

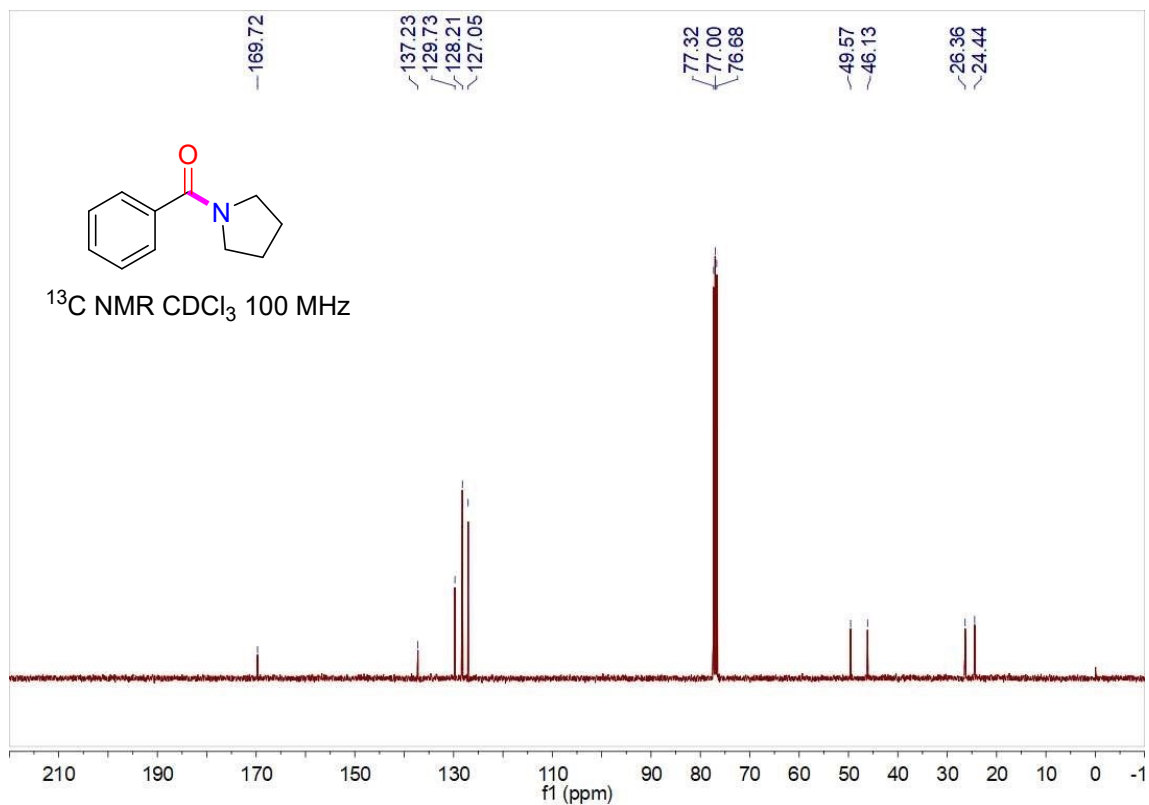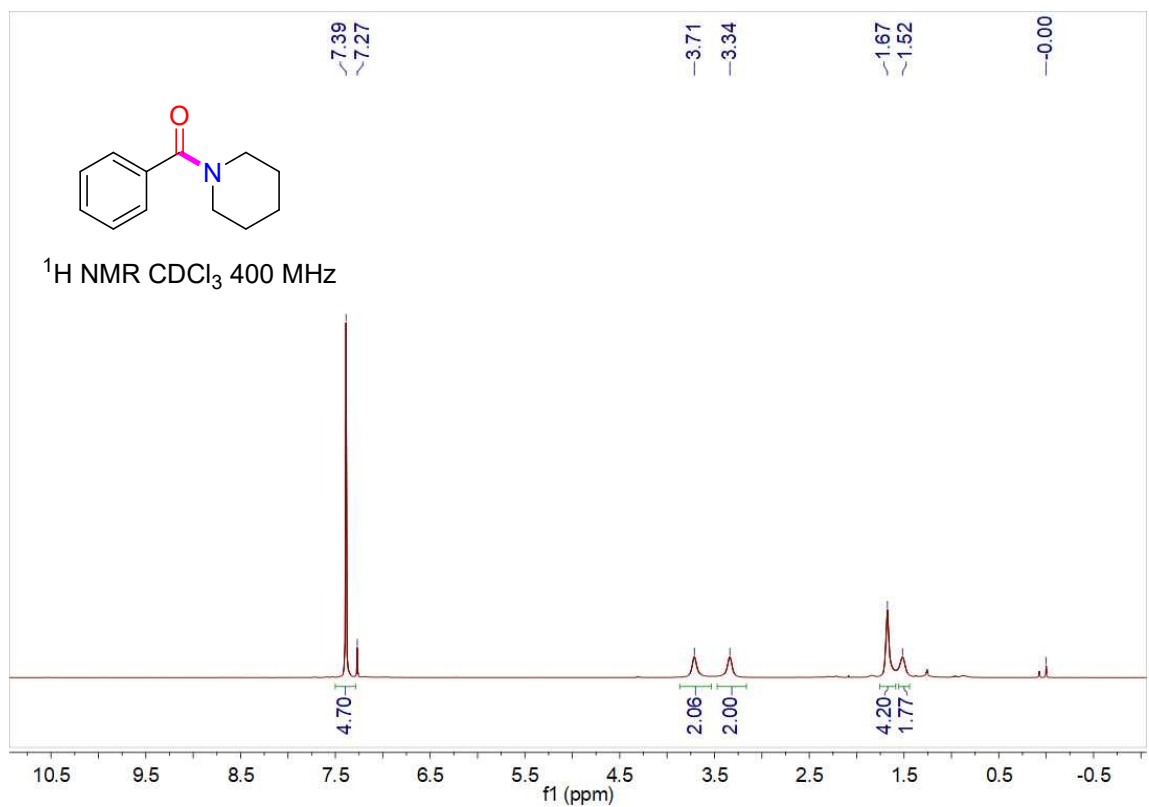

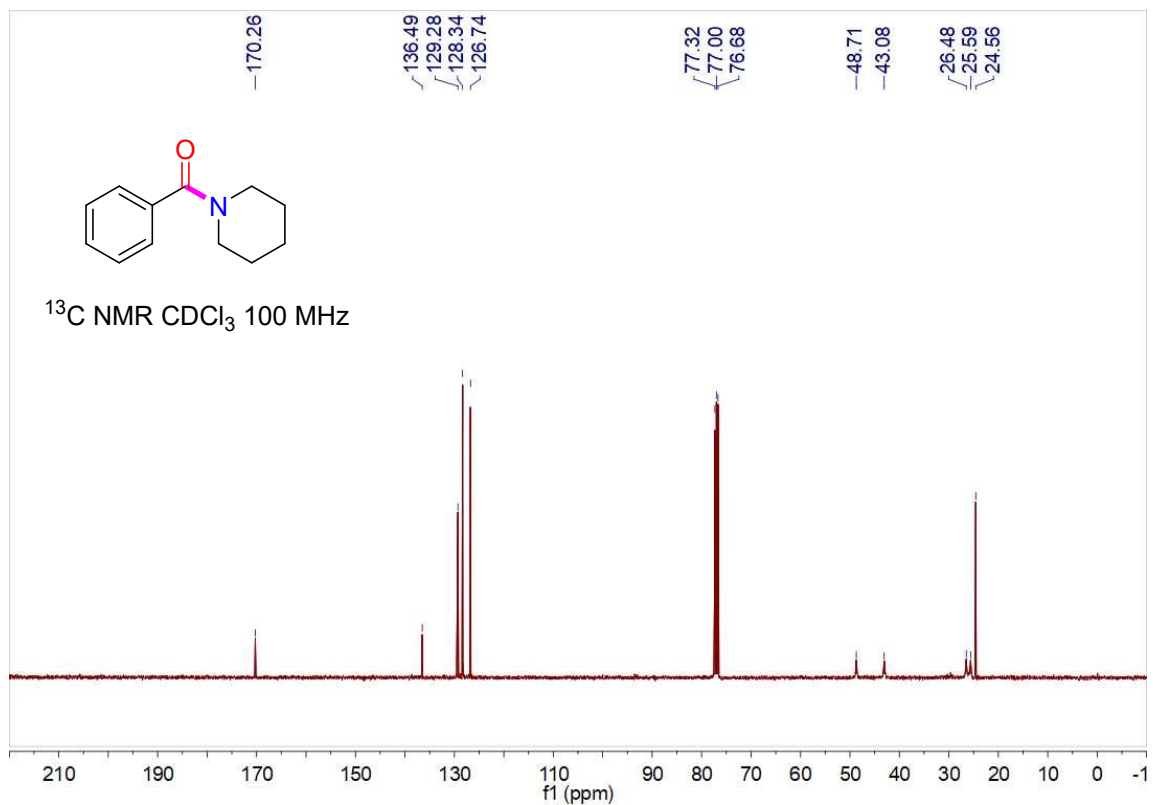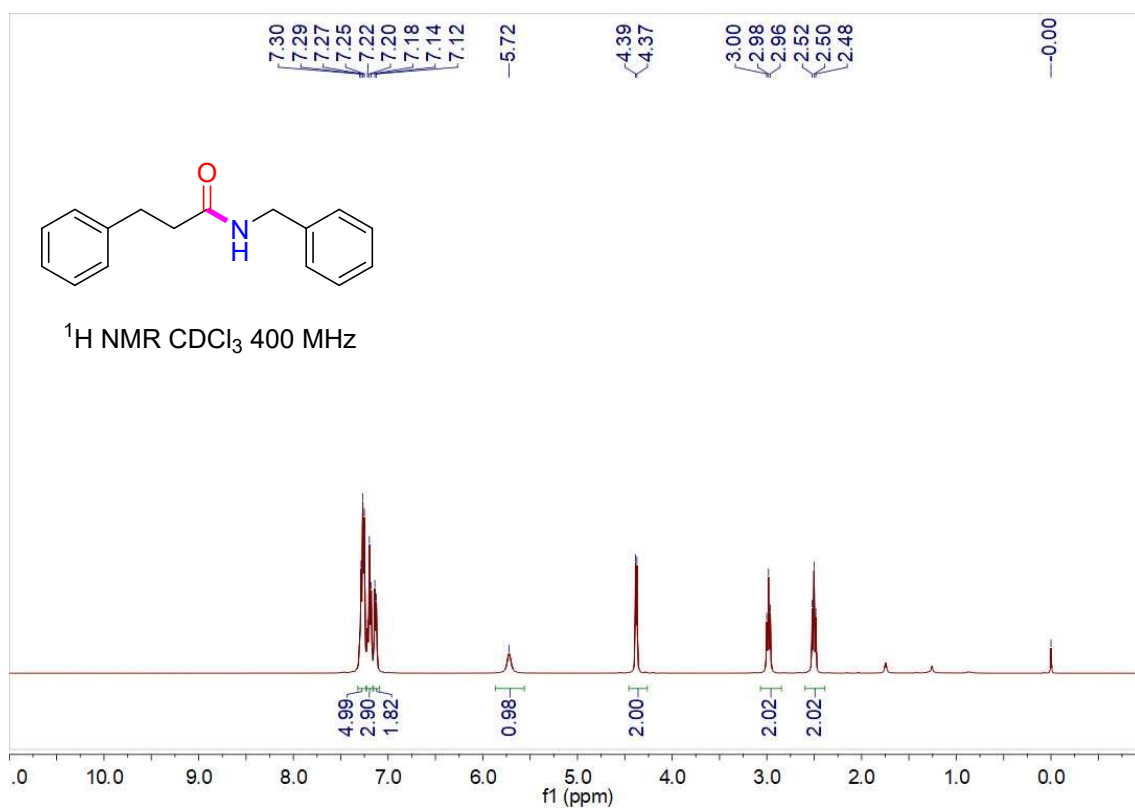

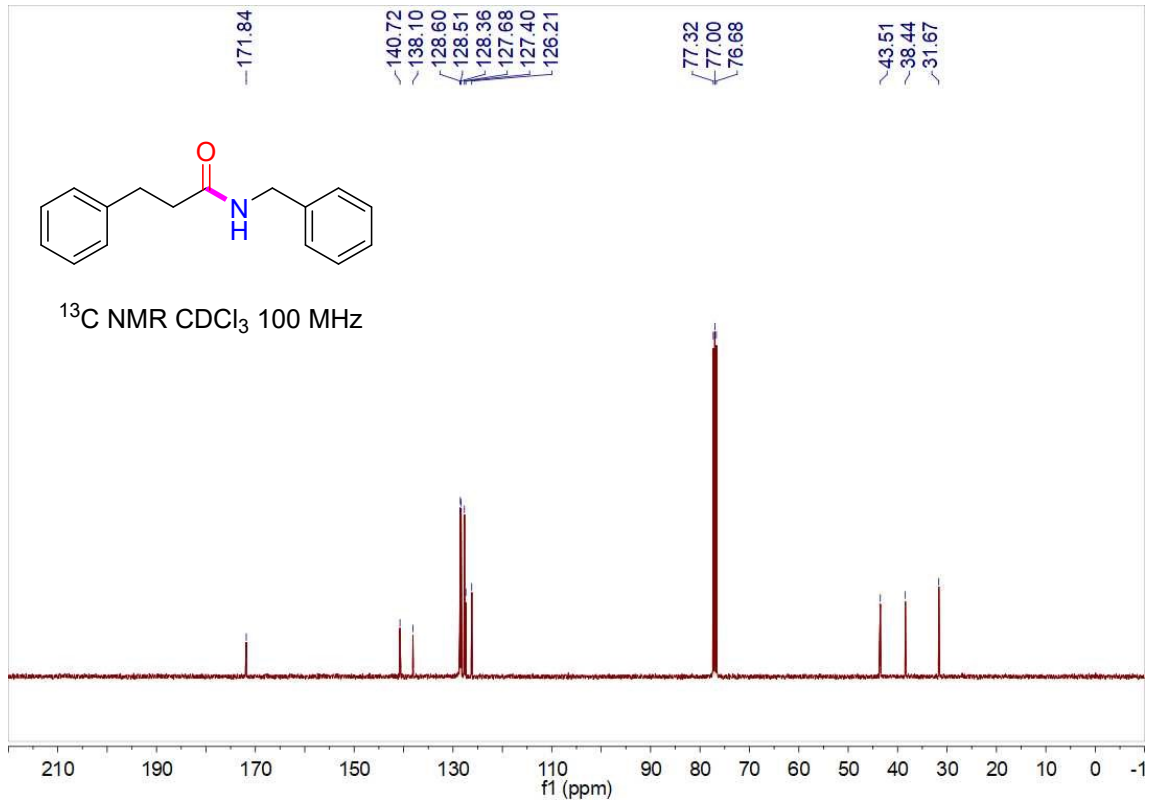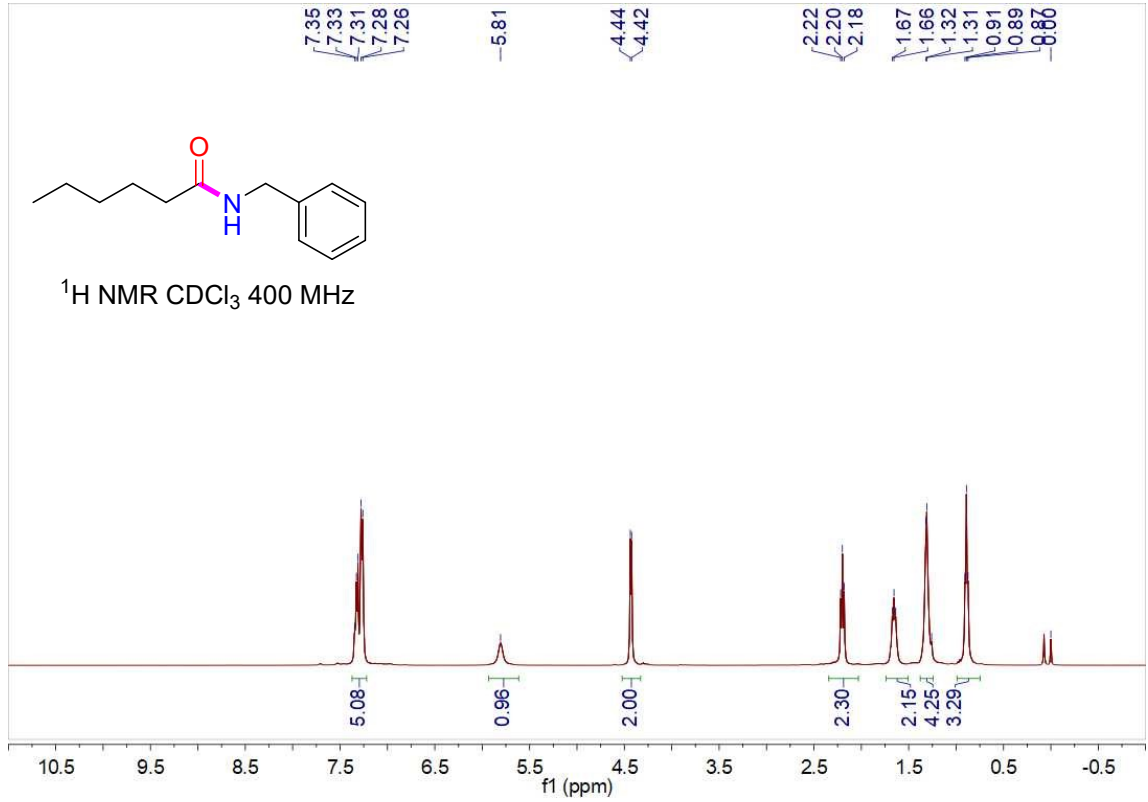



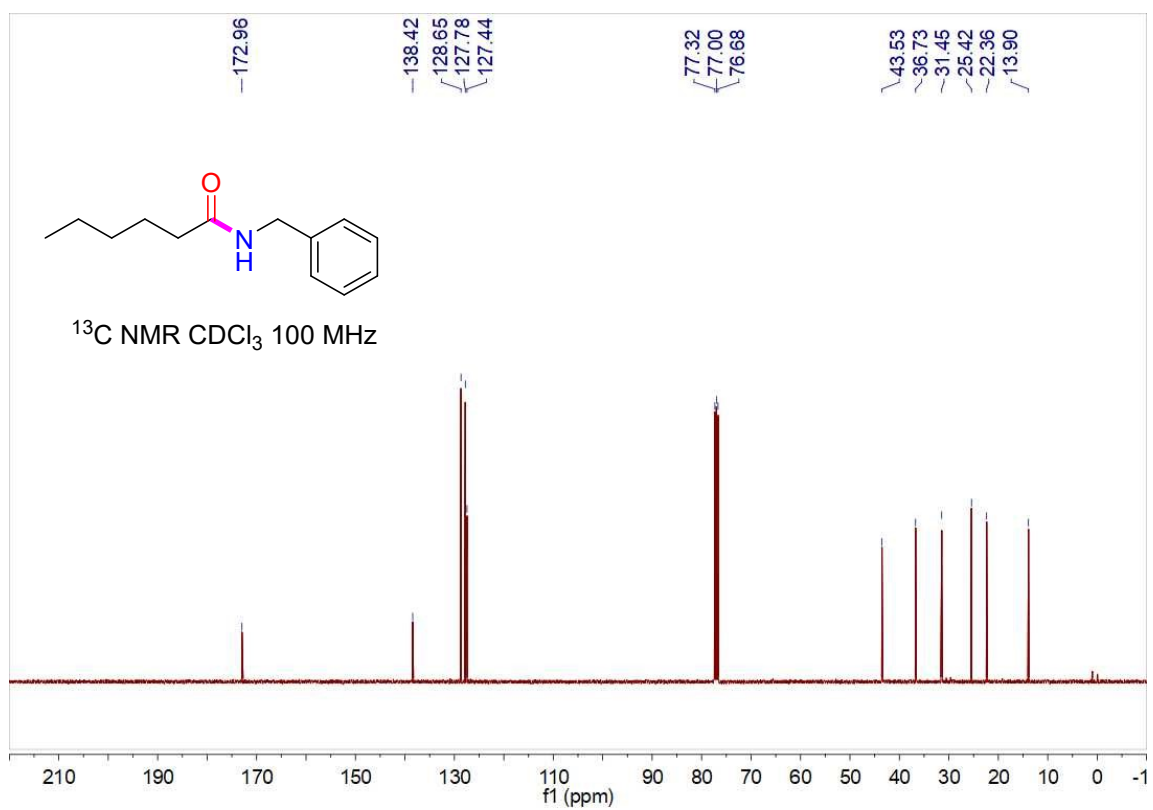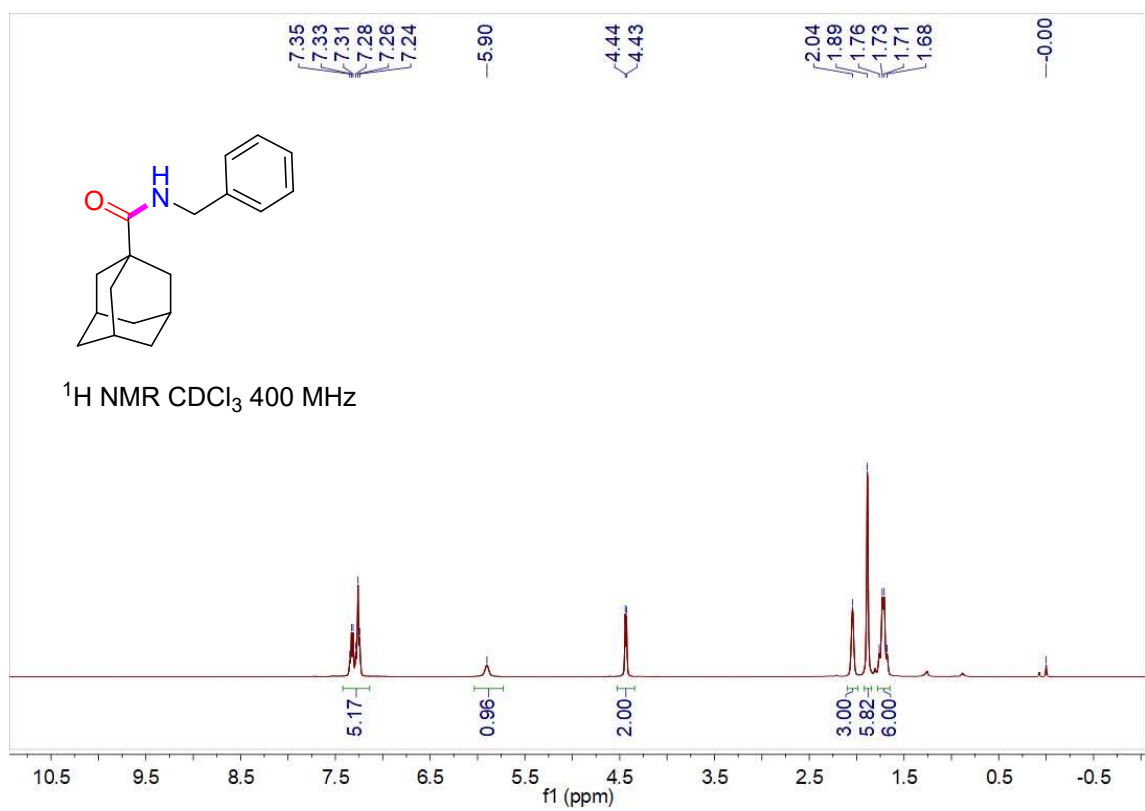

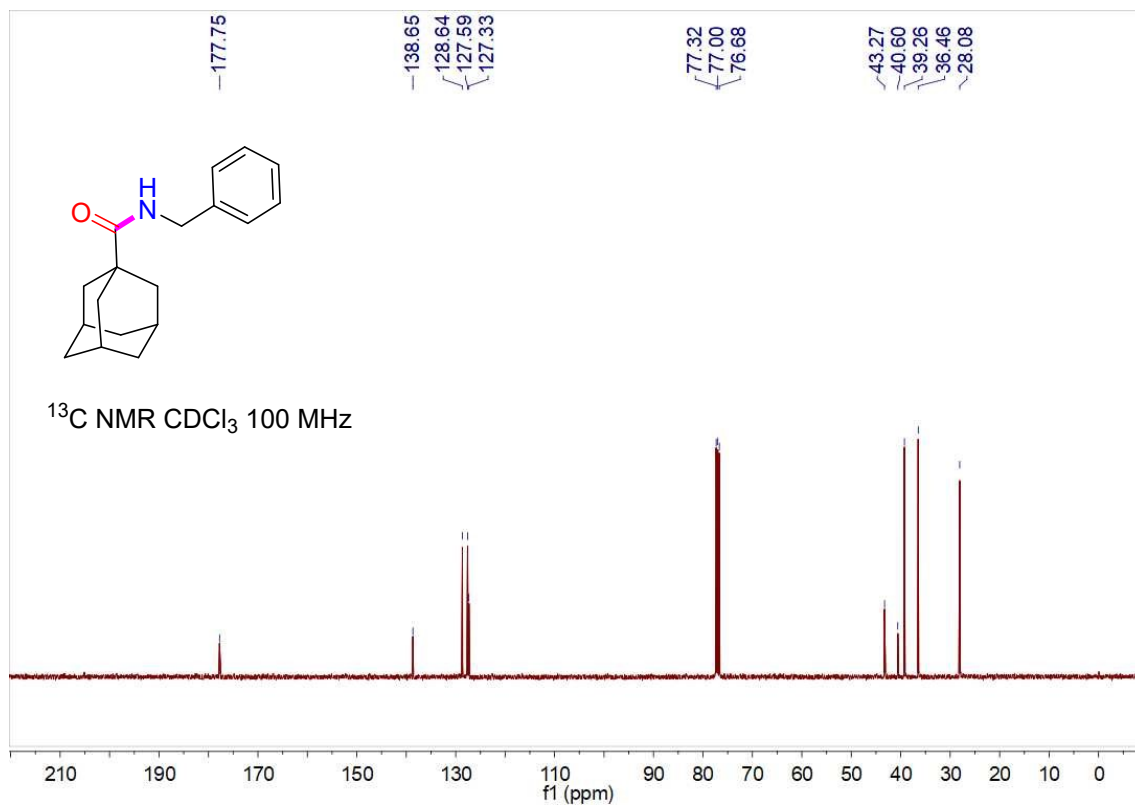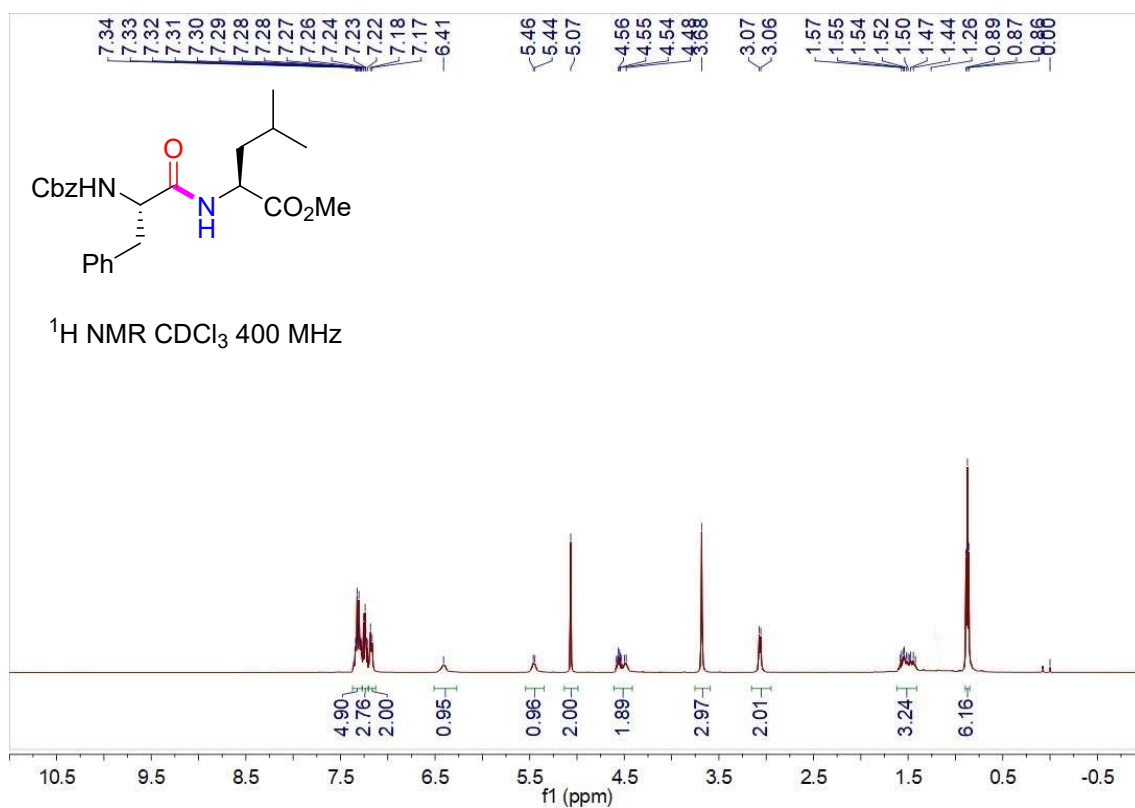

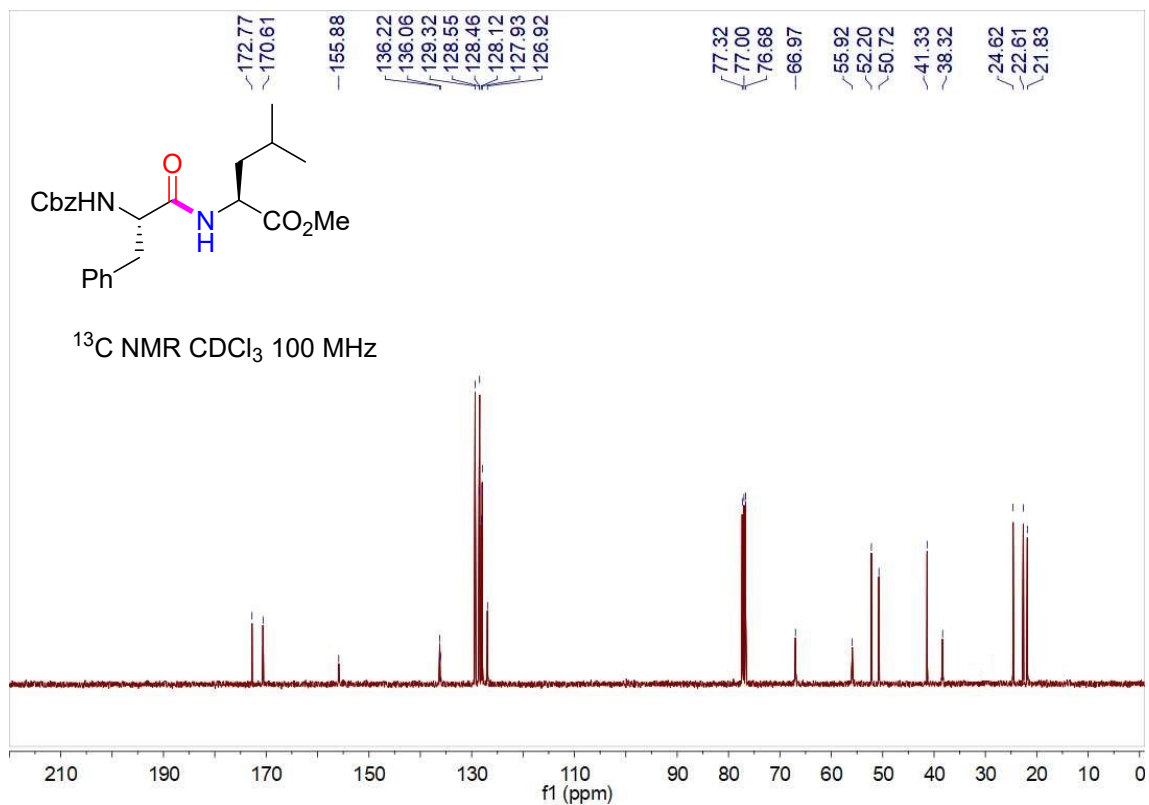

Chromatogram (NIS-NHC)

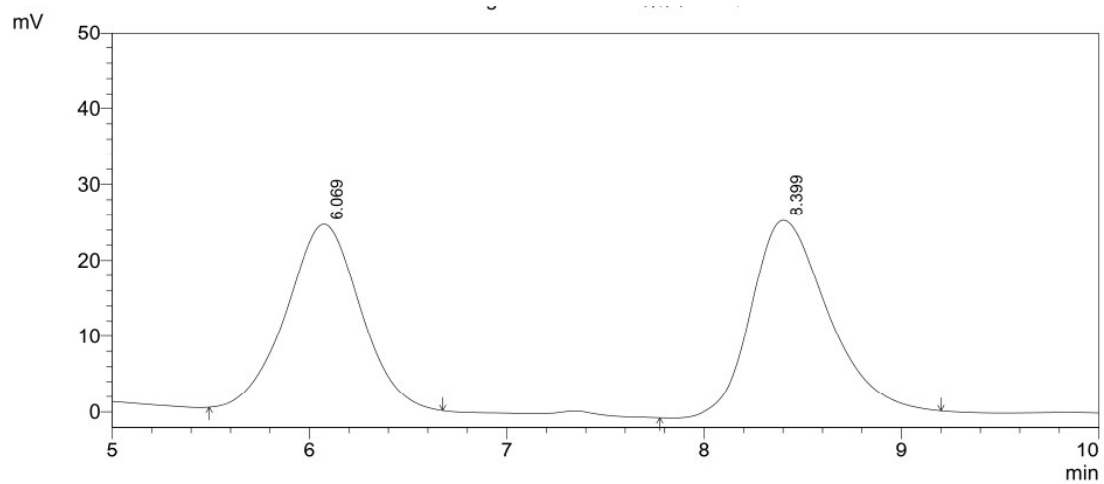

| Peak No | Ret. Time | Area    | Height | Area %  | Height% |
|---------|-----------|---------|--------|---------|---------|
| 1       | 6.069     | 634854  | 24343  | 47.872  | 48.712  |
| 2       | 8.399     | 691301  | 25631  | 52.128  | 51.288  |
| Total   |           | 1326155 | 49974  | 100.000 | 100.000 |

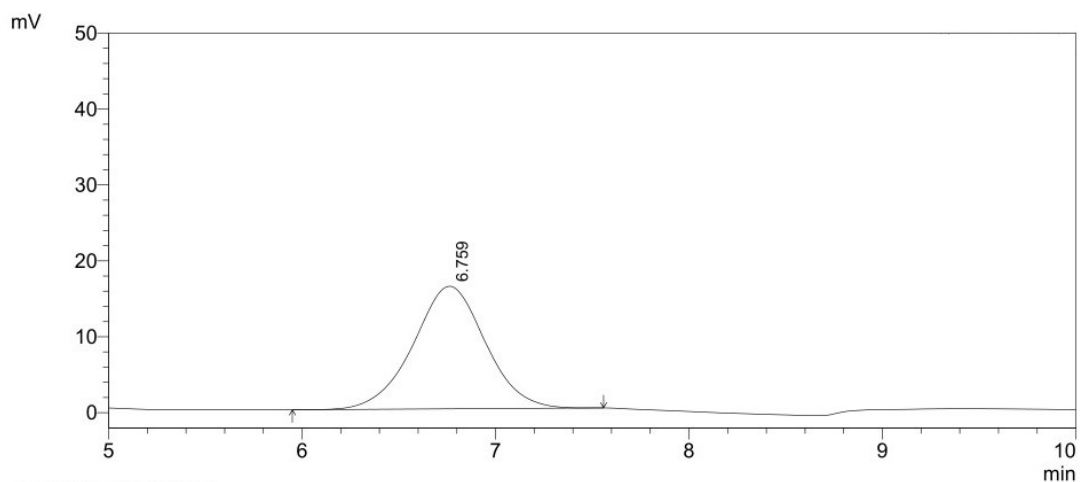

| Peak No | Ret. Time | Area   | Height | Area %  | Height% |
|---------|-----------|--------|--------|---------|---------|
| 1       | 6.759     | 418648 | 16134  | 100.000 | 100.000 |
| Total   |           | 418648 | 16134  | 100.000 | 100.000 |

Chromatogram (K<sub>2</sub>S<sub>2</sub>O<sub>8</sub>-NHC)

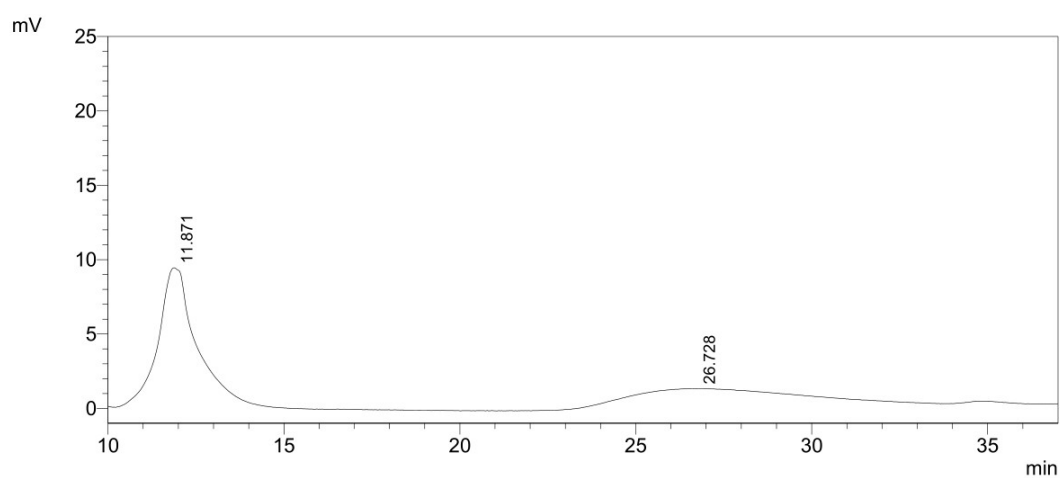

| Peak No | Ret. Time | Area    | Height | Area %  | Height% |
|---------|-----------|---------|--------|---------|---------|
| 1       | 11.871    | 511582  | 8324   | 51.094  | 86.168  |
| 2       | 26.728    | 489678  | 1336   | 48.906  | 13.832  |
| Total   |           | 1001260 | 9660   | 100.000 | 100.000 |

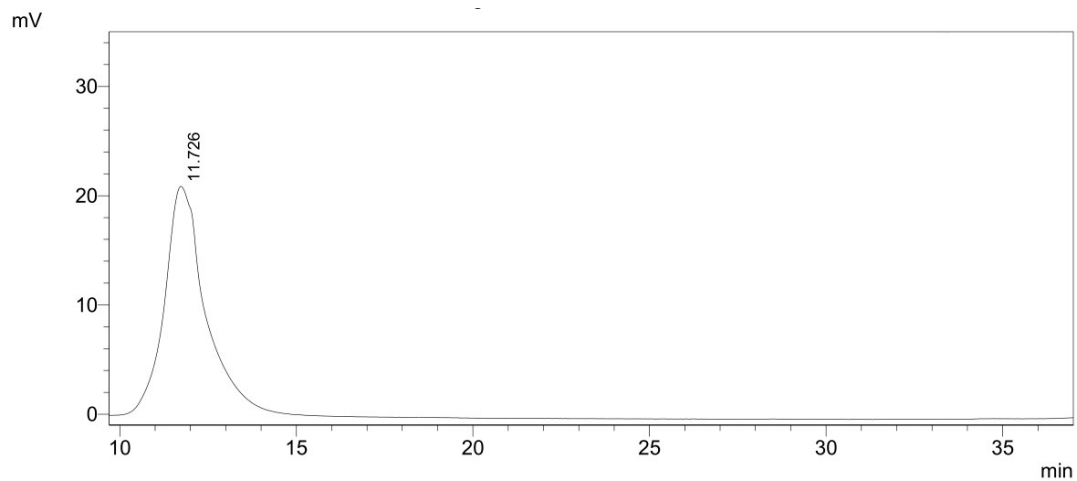

| Peak No | Ret. Time | Area    | Height | Area %  | Height% |
|---------|-----------|---------|--------|---------|---------|
| 1       | 11.726    | 1654196 | 20784  | 100.000 | 100.000 |
| Total   |           | 1654196 | 20784  | 100.000 | 100.000 |

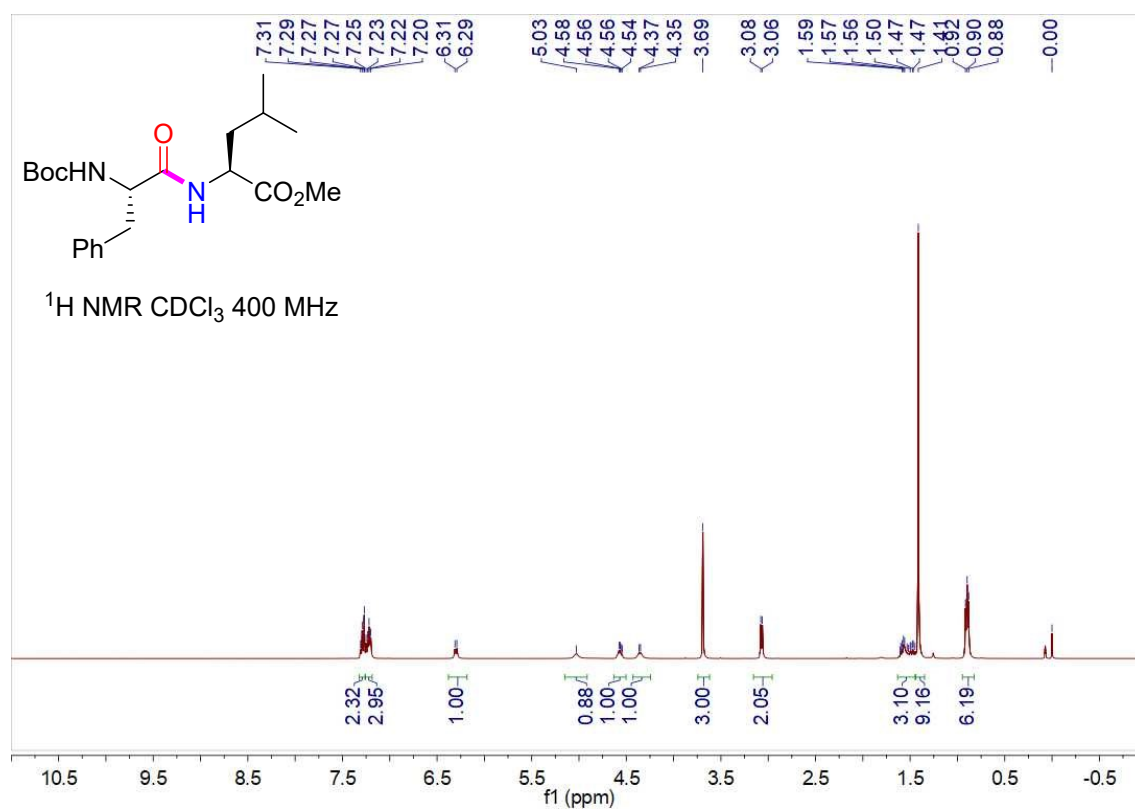

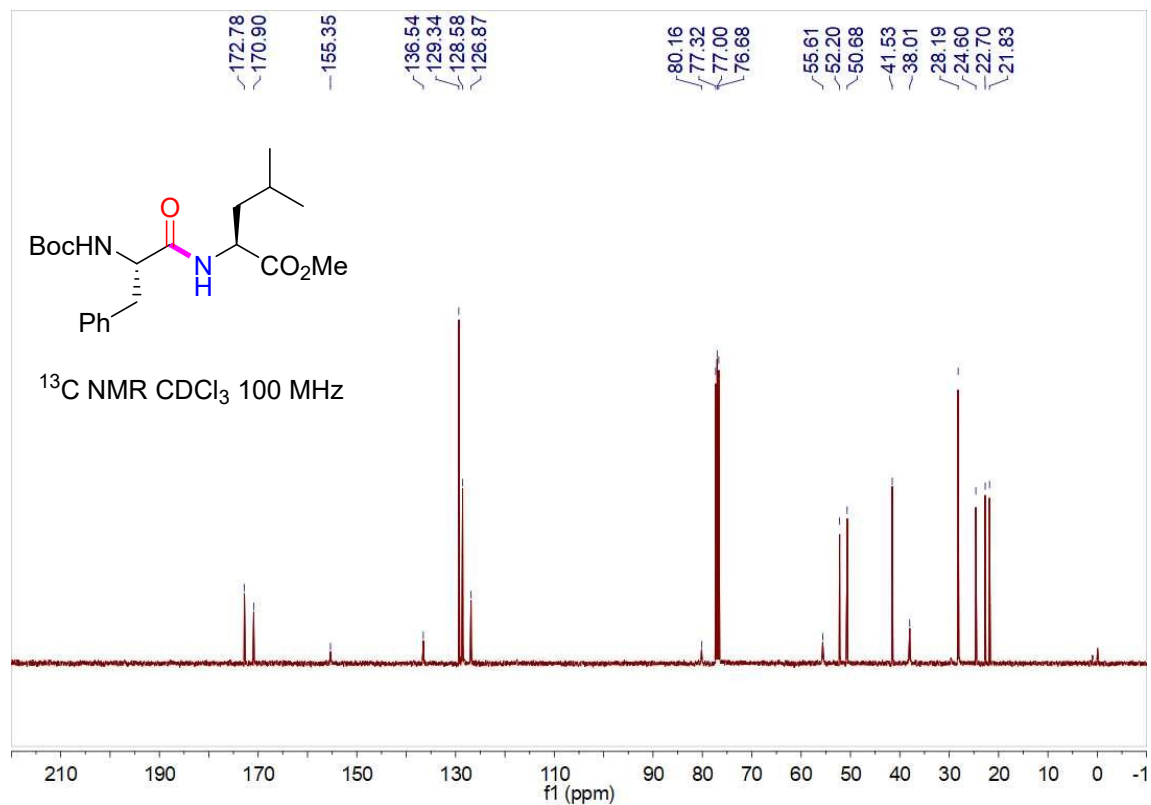

### Chromatogram

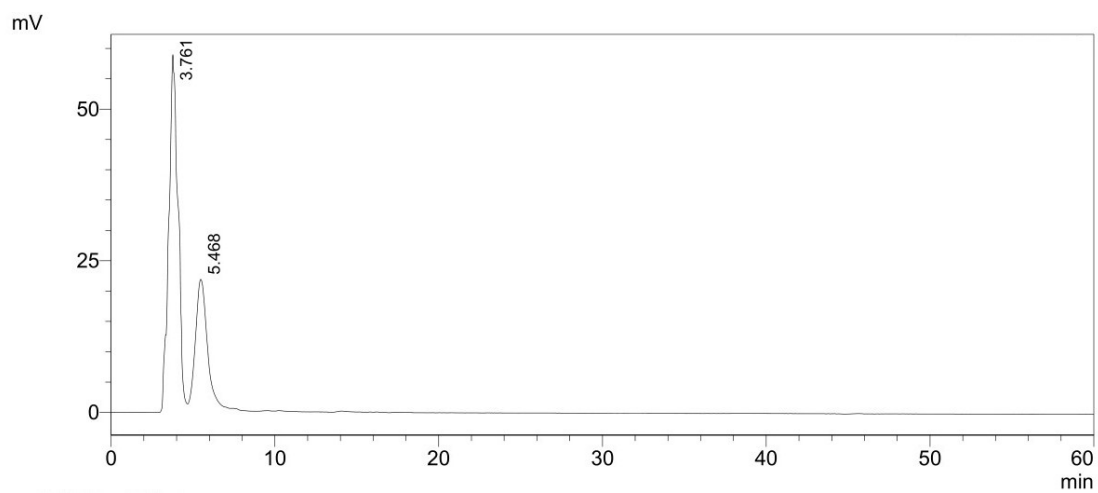

| Peak No | Ret. Time | Area    | Height | Area %  | Height% |
|---------|-----------|---------|--------|---------|---------|
| 1       | 3.761     | 1160289 | 42338  | 53.928  | 67.132  |
| 2       | 5.468     | 991243  | 20728  | 46.072  | 32.868  |
| Total   |           | 2151532 | 63066  | 100.000 | 100.000 |

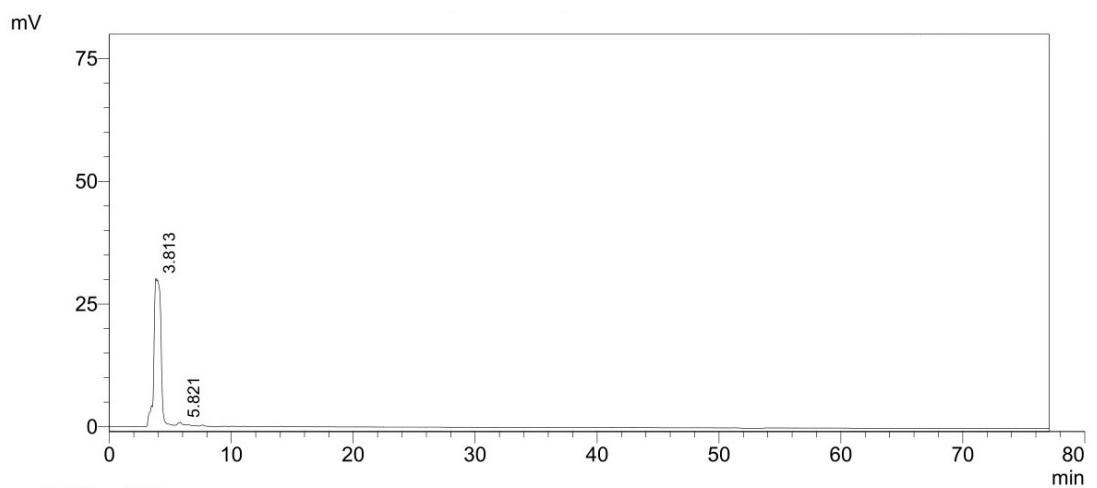

| Peak No | Ret. Time | Area    | Height | Area %  | Height% |
|---------|-----------|---------|--------|---------|---------|
| 1       | 3.813     | 1003465 | 28048  | 98.095  | 97.790  |
| 2       | 5.821     | 19487   | 634    | 1.905   | 2.210   |
| Total   |           | 1022952 | 28682  | 100.000 | 100.000 |

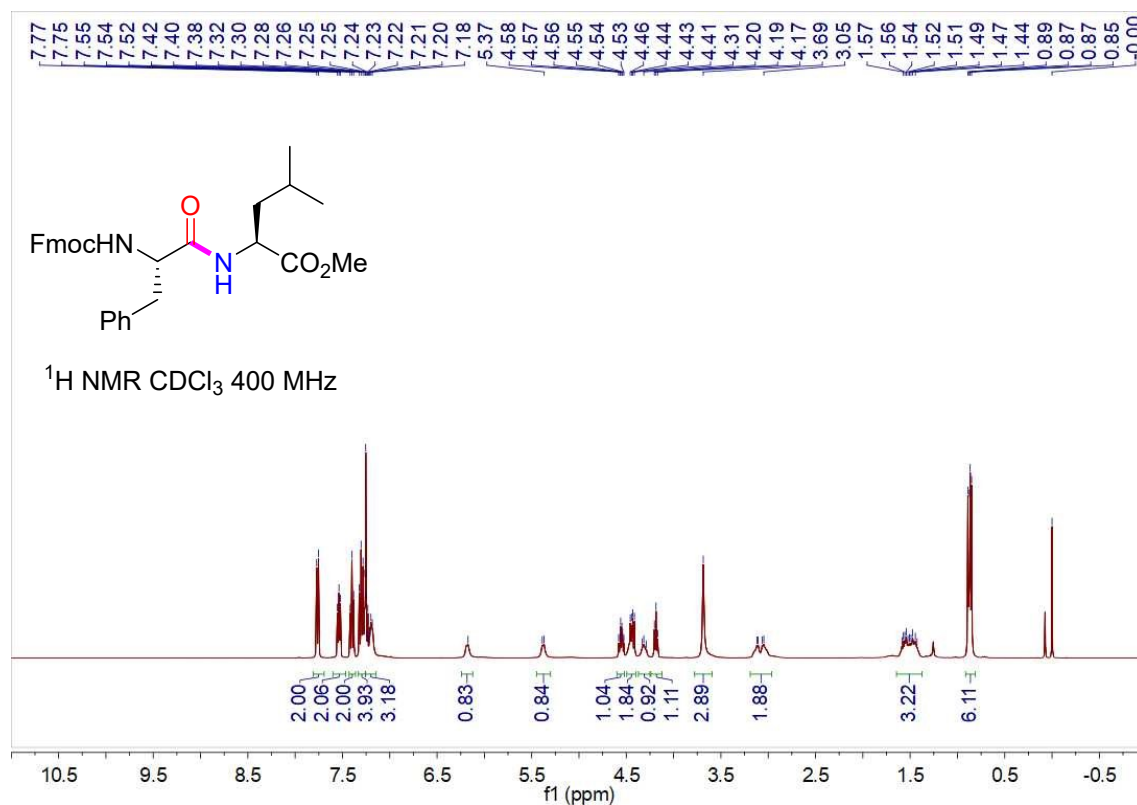

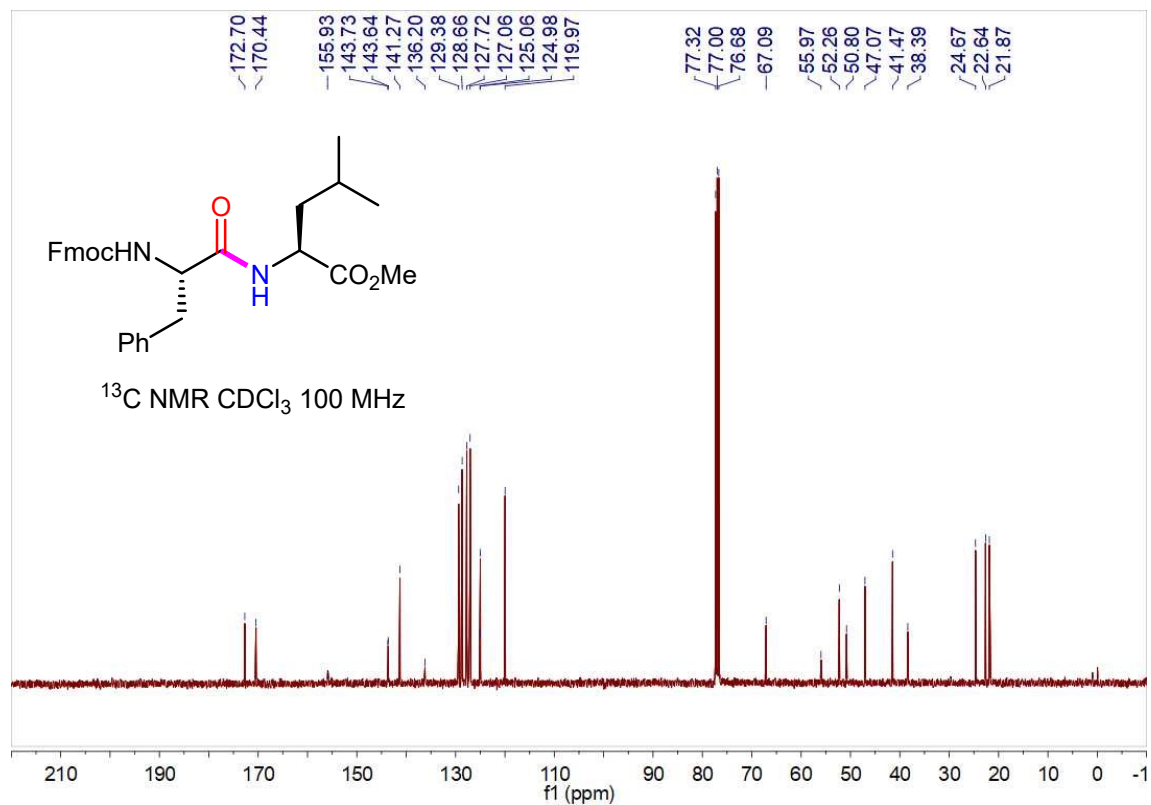

Chromatogram

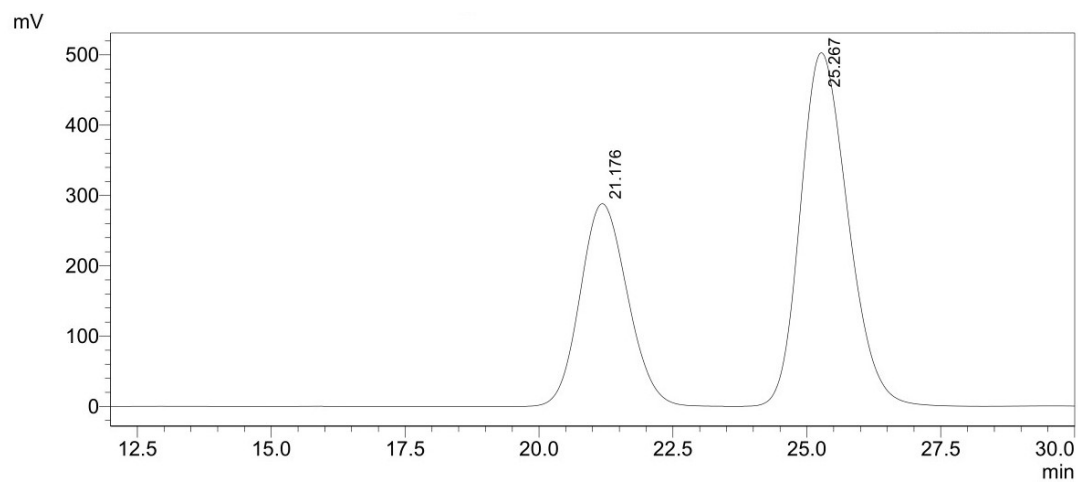

| Peak No | Ret. Time | Area     | Height | Area %  | Height% |
|---------|-----------|----------|--------|---------|---------|
| 1       | 21.176    | 17494772 | 286935 | 36.068  | 36.343  |
| 2       | 25.267    | 31010482 | 502576 | 63.932  | 63.657  |
| Total   |           | 48505254 | 789511 | 100.000 | 100.000 |



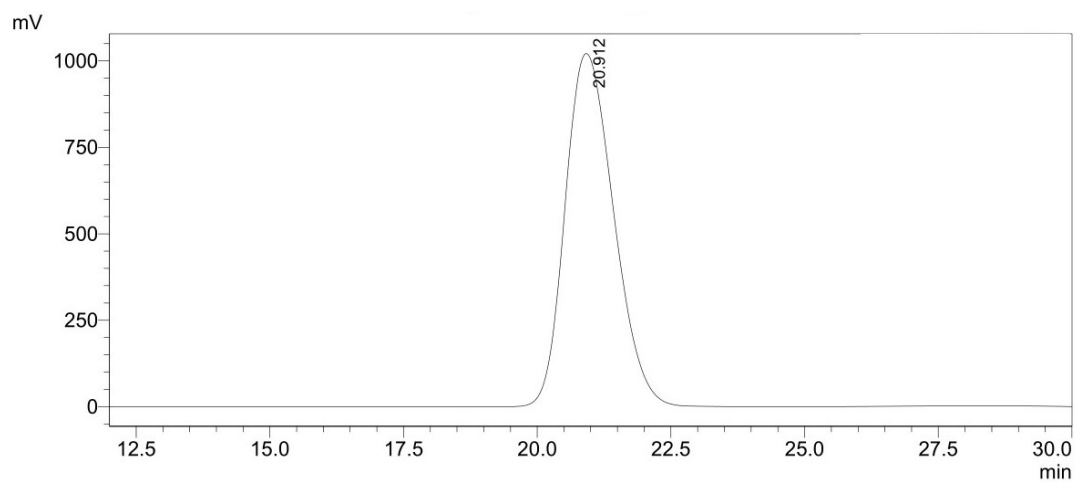

| Peak No | Ret. Time | Area     | Height  | Area %  | Height% |
|---------|-----------|----------|---------|---------|---------|
| 1       | 20.912    | 64404158 | 1021013 | 100.000 | 100.000 |
| Total   |           | 64404158 | 1021013 | 100.000 | 100.000 |

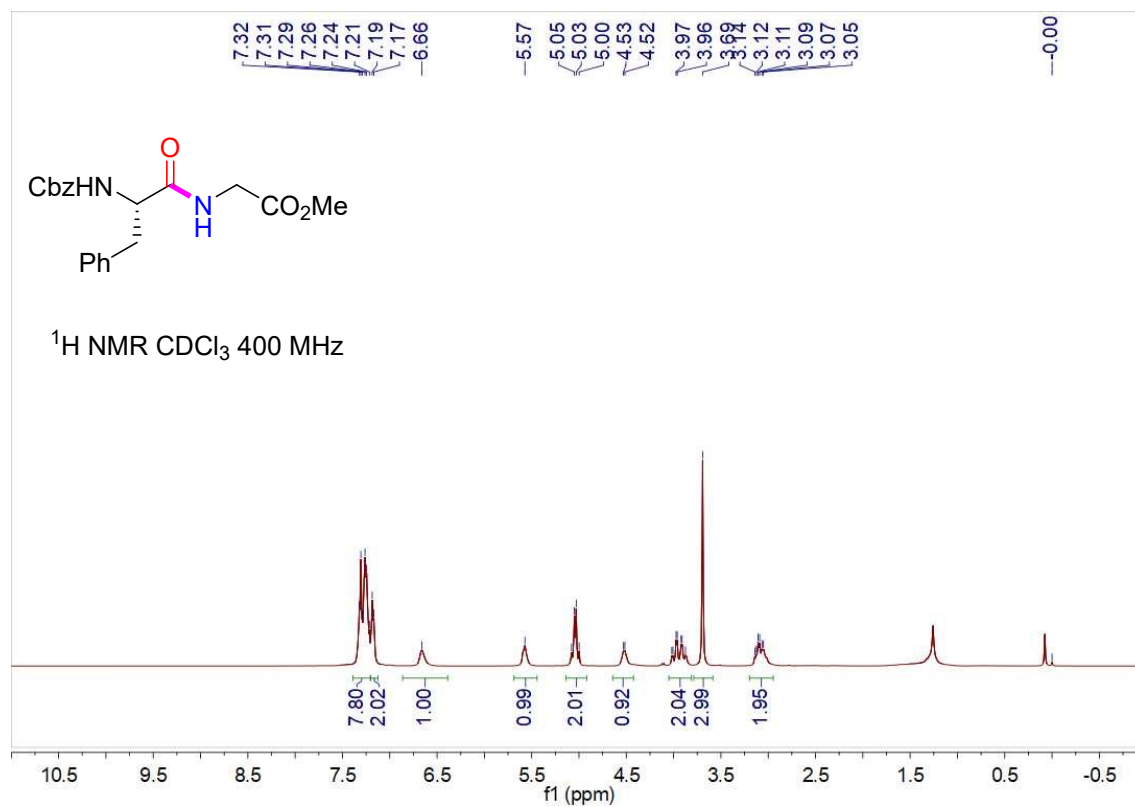

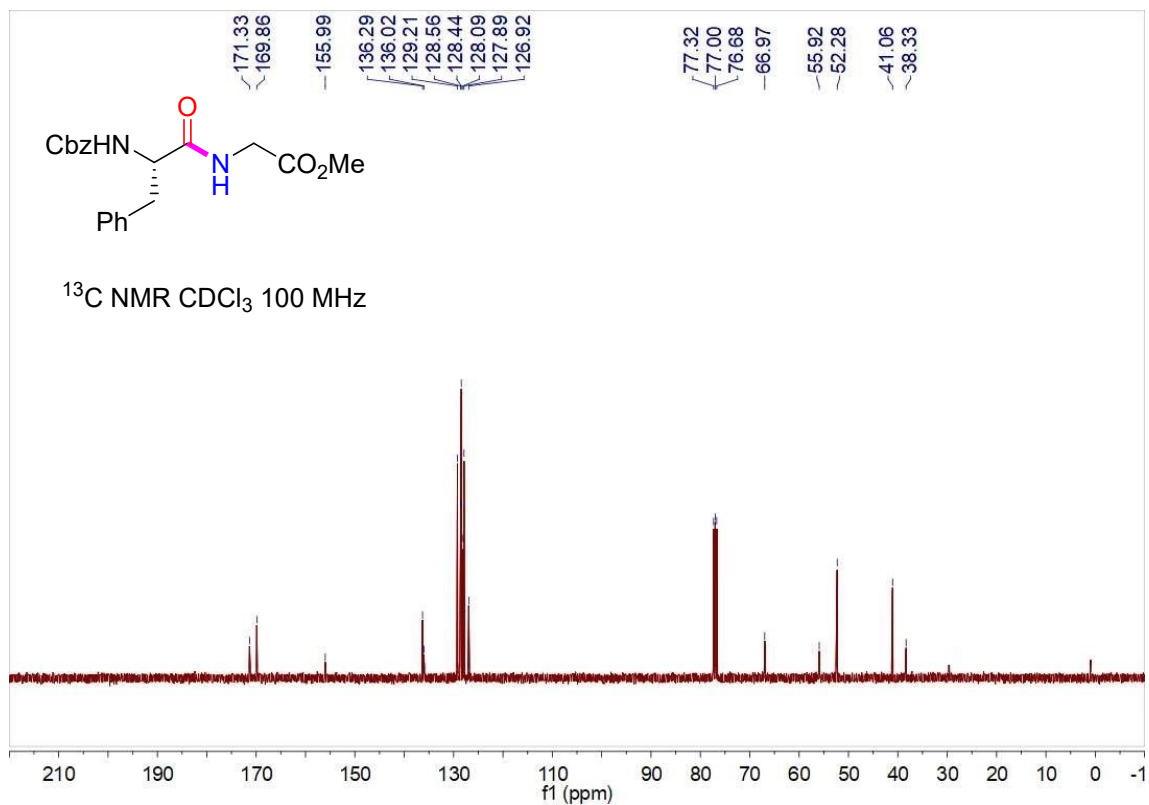

Chromatogram (NIS-NHC)

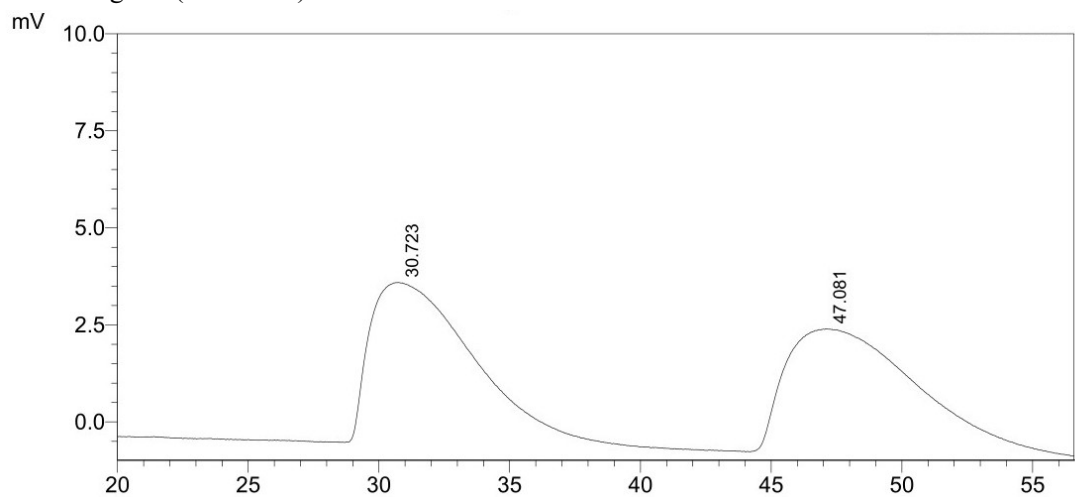

| Peak No | Ret. Time | Area     | Height | Area %  | Height% |
|---------|-----------|----------|--------|---------|---------|
| 1       | 30.723    | 1119037  | 4119   | 50.087  | 56.387  |
| 2       | 47.081    | 1115156  | 3186   | 49.913  | 43.613  |
| Total   |           | 22234193 | 7305   | 100.000 | 100.000 |

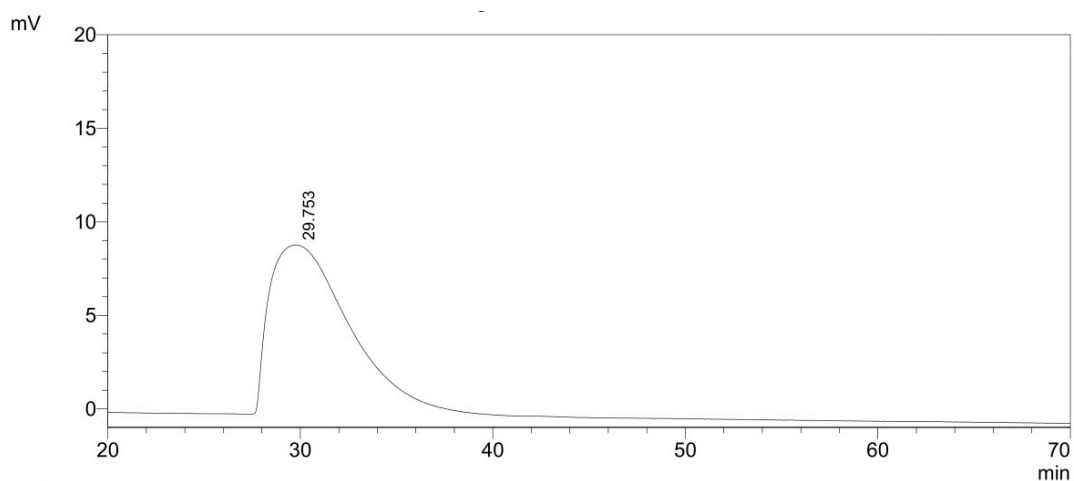

| Peak No | Ret. Time | Area    | Height | Area %  | Height% |
|---------|-----------|---------|--------|---------|---------|
| 1       | 29.753    | 2648667 | 9076   | 100.000 | 100.000 |
| Total   |           | 2648667 | 9076   | 100.000 | 100.000 |

Chromatogram ( $K_2S_2O_8$ -NHC)

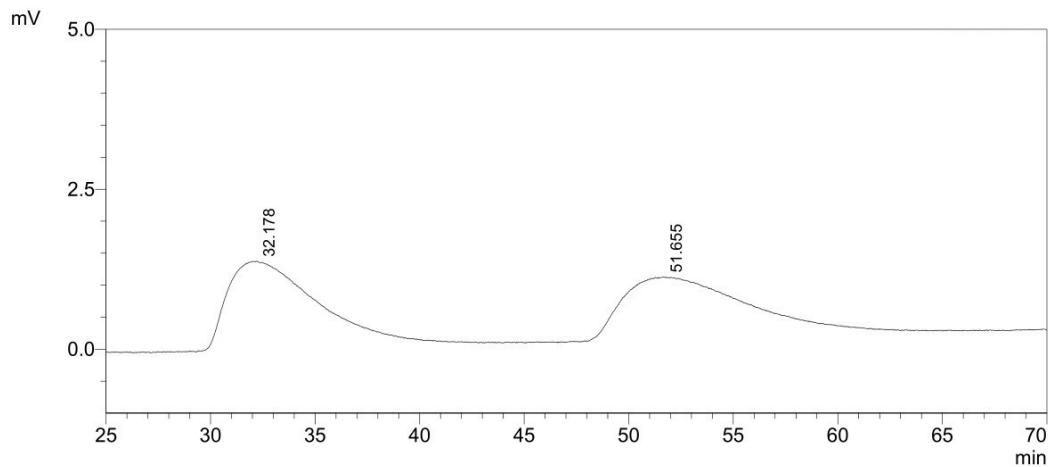

| Peak No | Ret. Time | Area   | Height | Area %  | Height% |
|---------|-----------|--------|--------|---------|---------|
| 1       | 32.178    | 358275 | 1329   | 51.633  | 59.106  |
| 2       | 51.655    | 335612 | 920    | 48.367  | 40.894  |
| Total   |           | 693887 | 2249   | 100.000 | 100.000 |

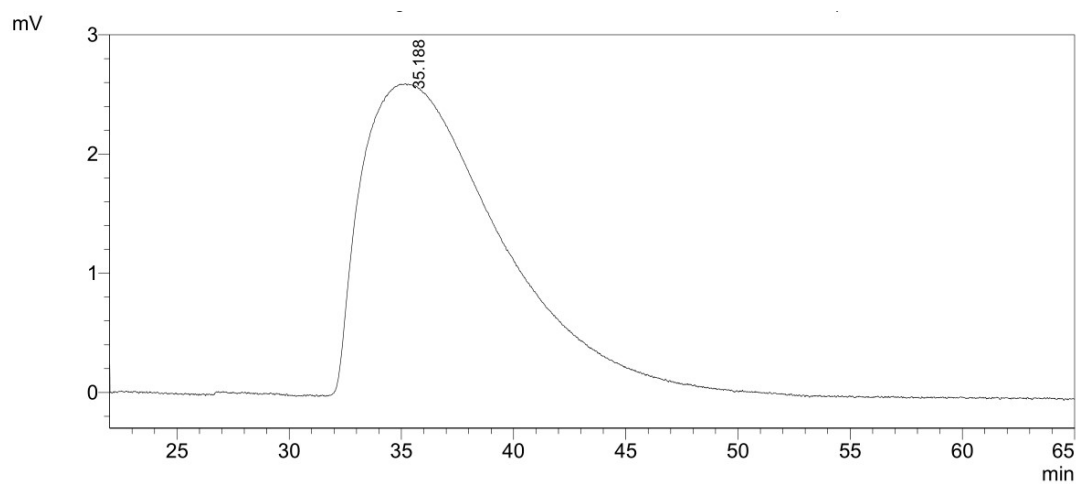

| Peak No | Ret. Time | Area   | Height | Area %  | Height% |
|---------|-----------|--------|--------|---------|---------|
| 1       | 35.188    | 958365 | 2510   | 100.000 | 100.000 |
| Total   |           | 958365 | 2510   | 100.000 | 100.000 |

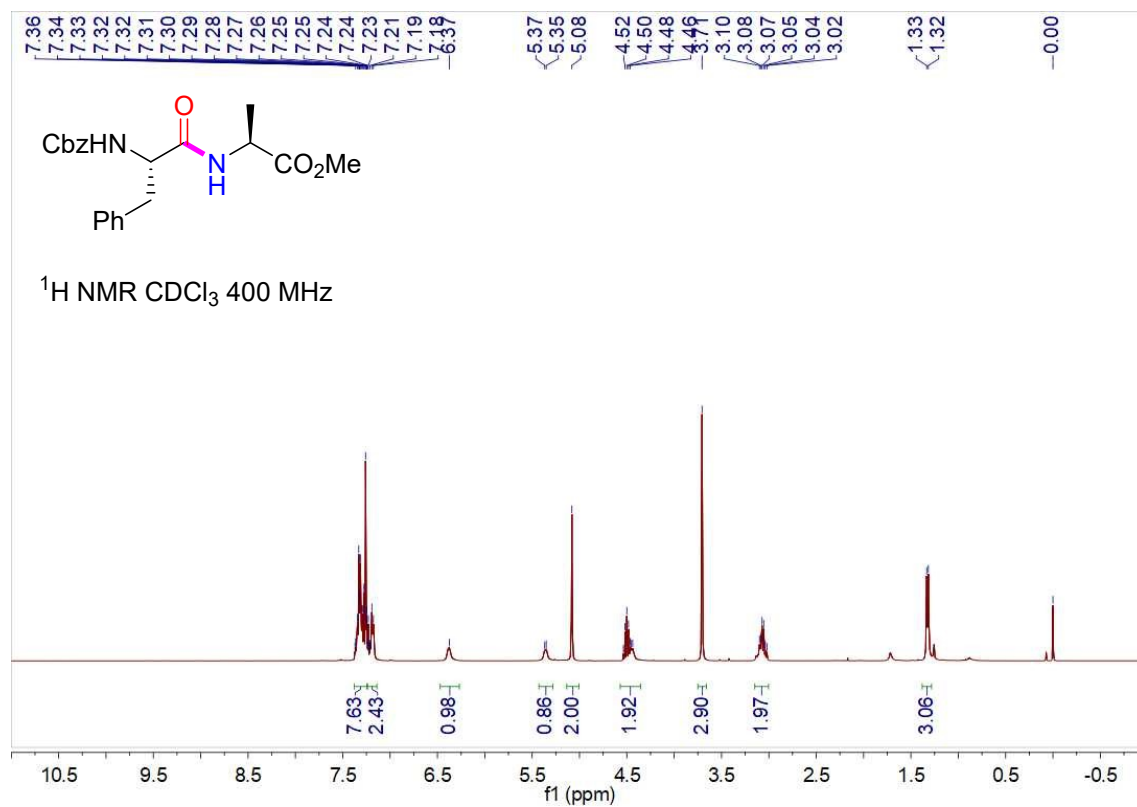

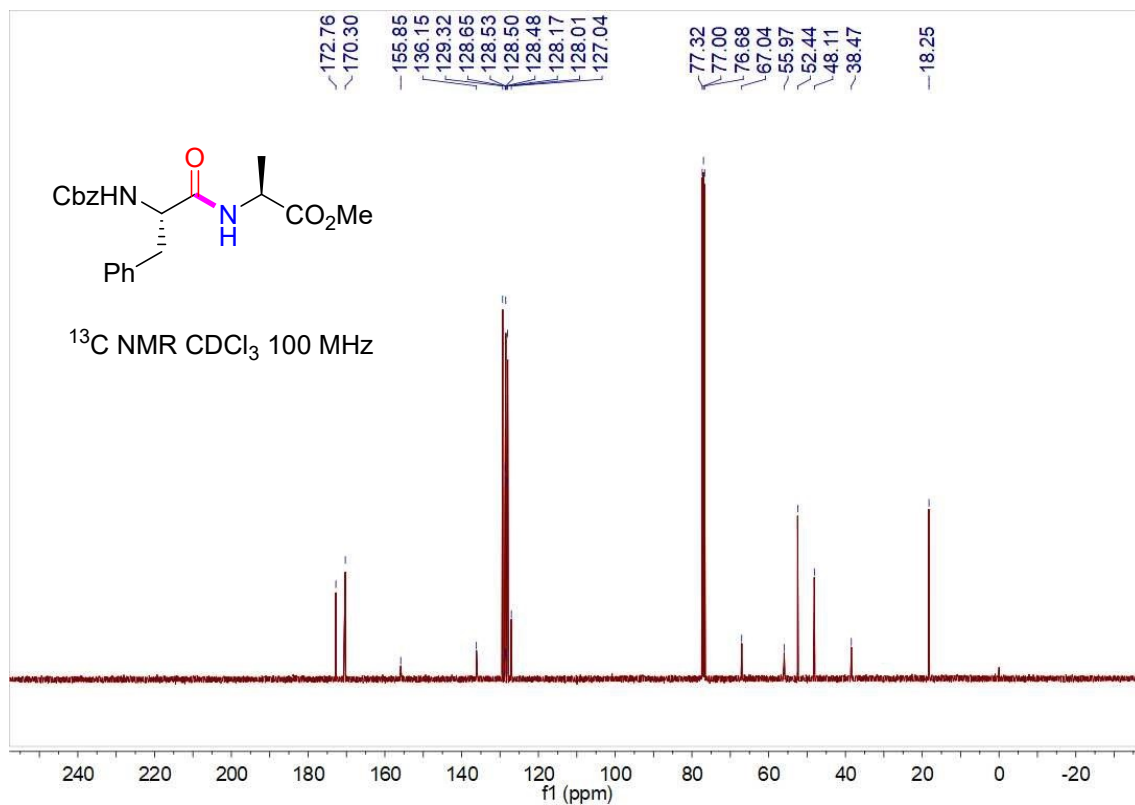

Chromatogram

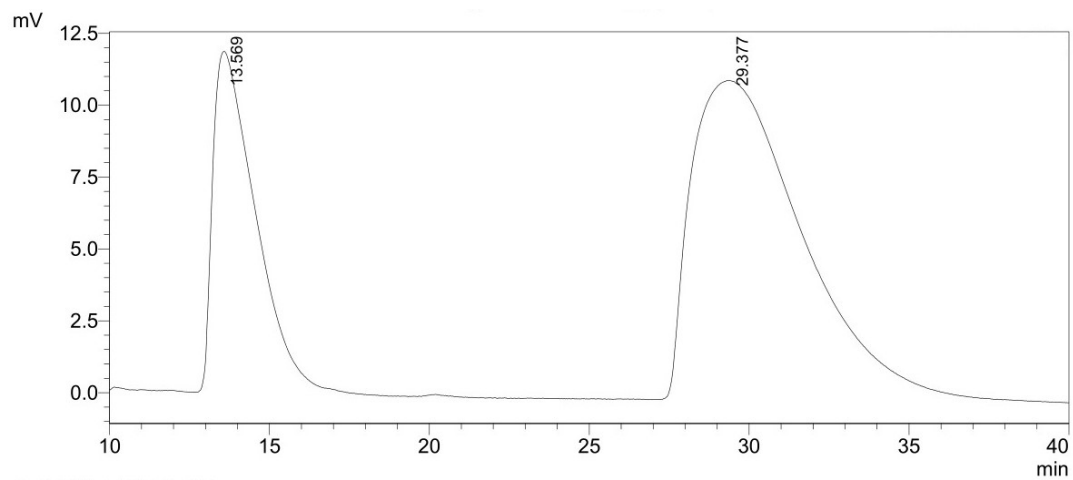

| Peak No | Ret. Time | Area    | Height | Area %  | Height% |
|---------|-----------|---------|--------|---------|---------|
| 1       | 13.569    | 1106242 | 11838  | 50.683  | 64.159  |
| 2       | 29.377    | 1076442 | 6613   | 49.317  | 35.841  |
| Total   |           | 2182684 | 18451  | 100.000 | 100.000 |

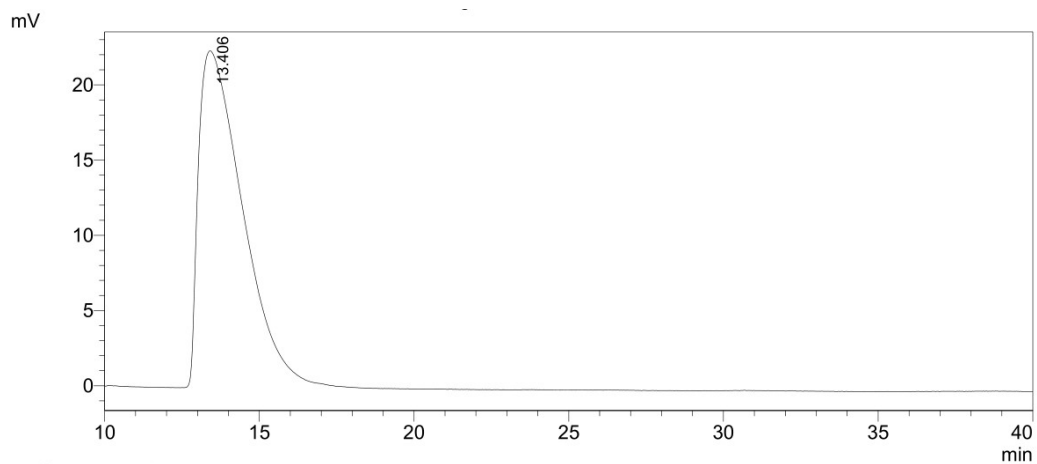

| Peak No | Ret. Time | Area    | Height | Area %  | Height% |
|---------|-----------|---------|--------|---------|---------|
| 1       | 13.406    | 2210823 | 22364  | 100.000 | 100.000 |
| Total   |           | 2210823 | 22364  | 100.000 | 100.000 |

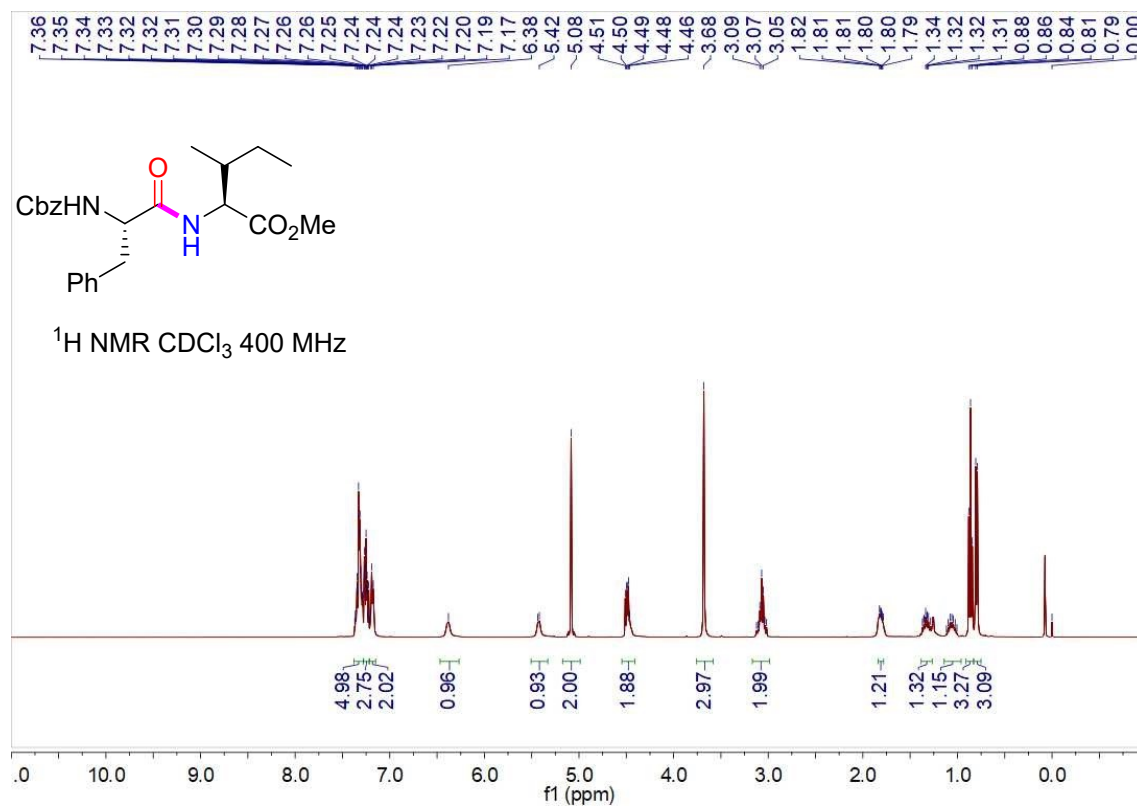

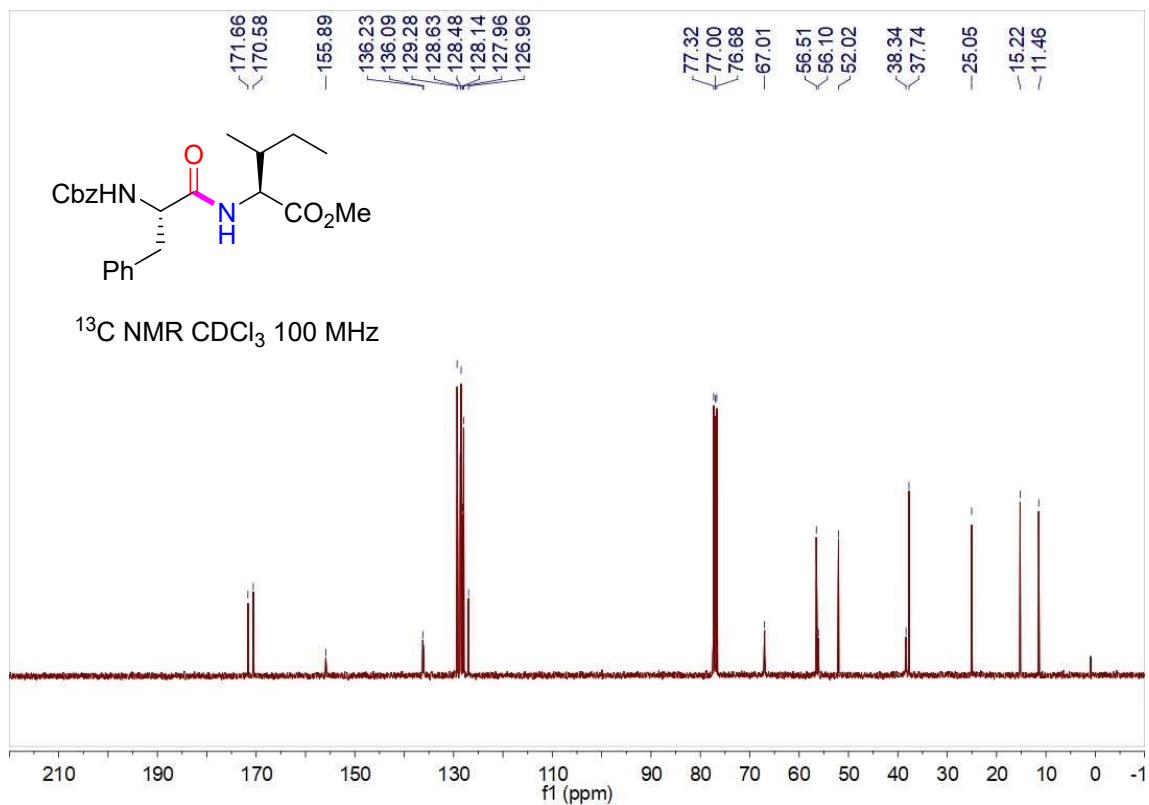

### Chromatogram

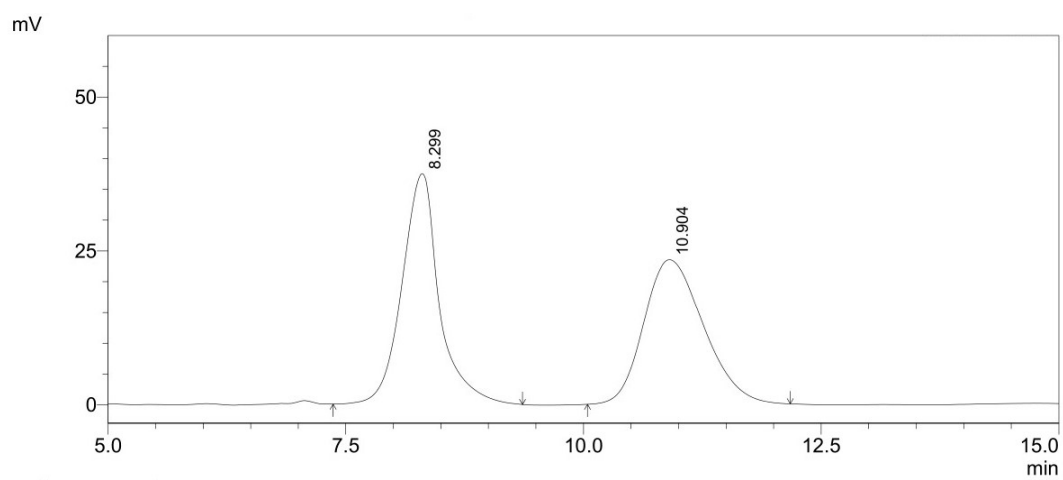

| Peak No | Ret. Time | Area    | Height | Area %  | Height% |
|---------|-----------|---------|--------|---------|---------|
| 1       | 8.299     | 1022480 | 37476  | 49.934  | 61.477  |
| 2       | 10.904    | 1025200 | 23486  | 50.066  | 38.523  |
| Total   |           | 2047680 | 60959  | 100.000 | 100.000 |

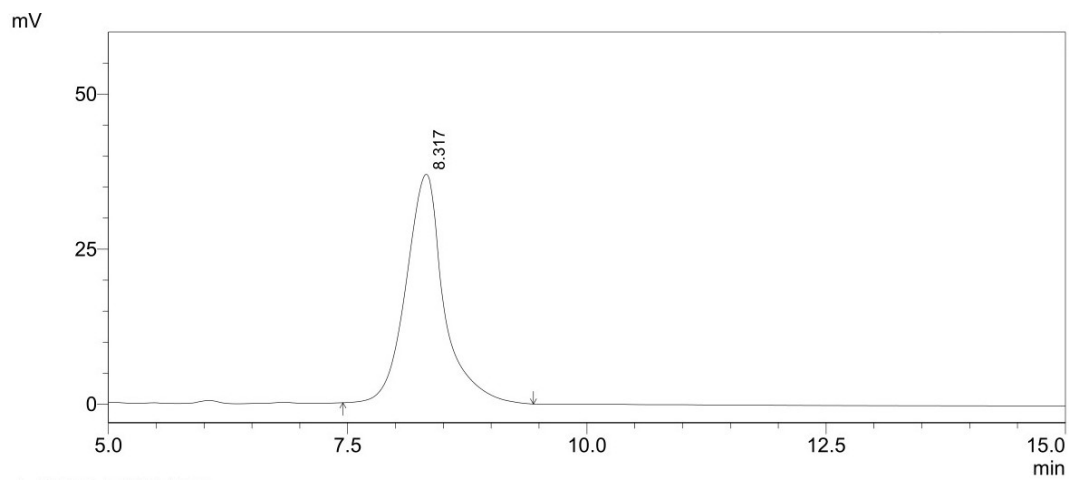

| Peak No | Ret. Time | Area    | Height | Area %  | Height% |
|---------|-----------|---------|--------|---------|---------|
| 1       | 8.317     | 1016427 | 36919  | 100.000 | 100.000 |
| Total   |           | 1016427 | 36919  | 100.000 | 100.000 |

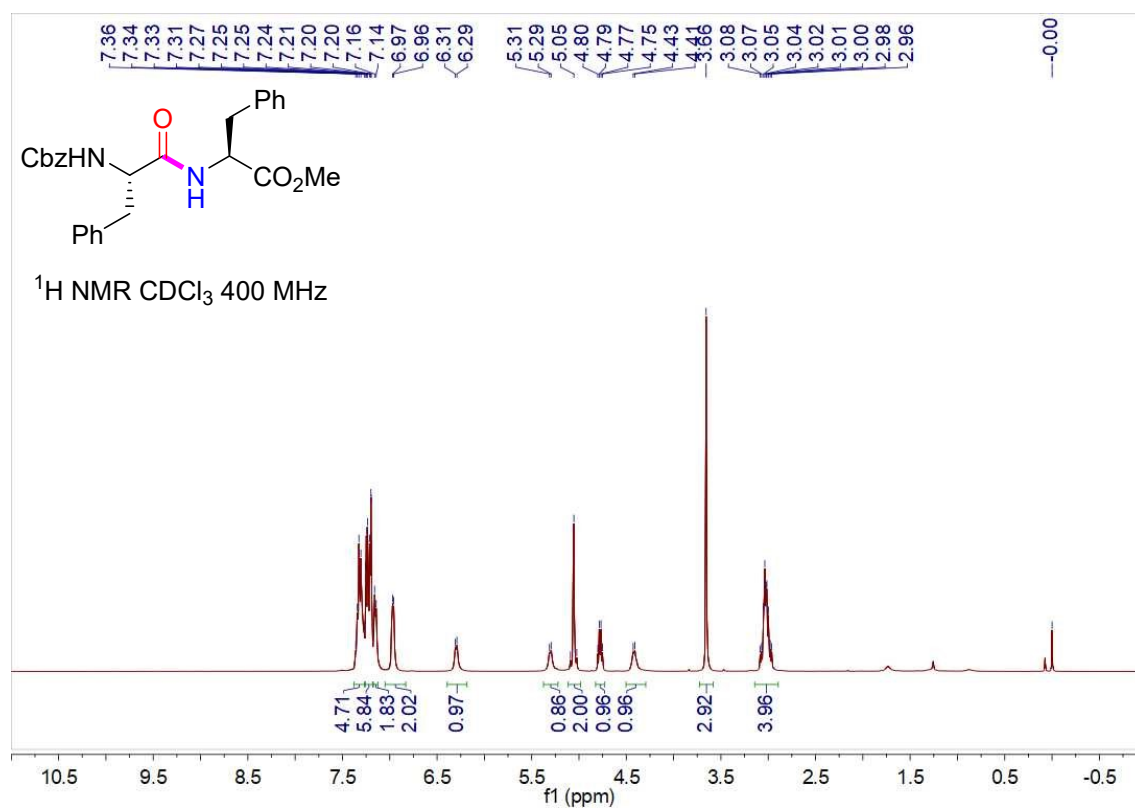



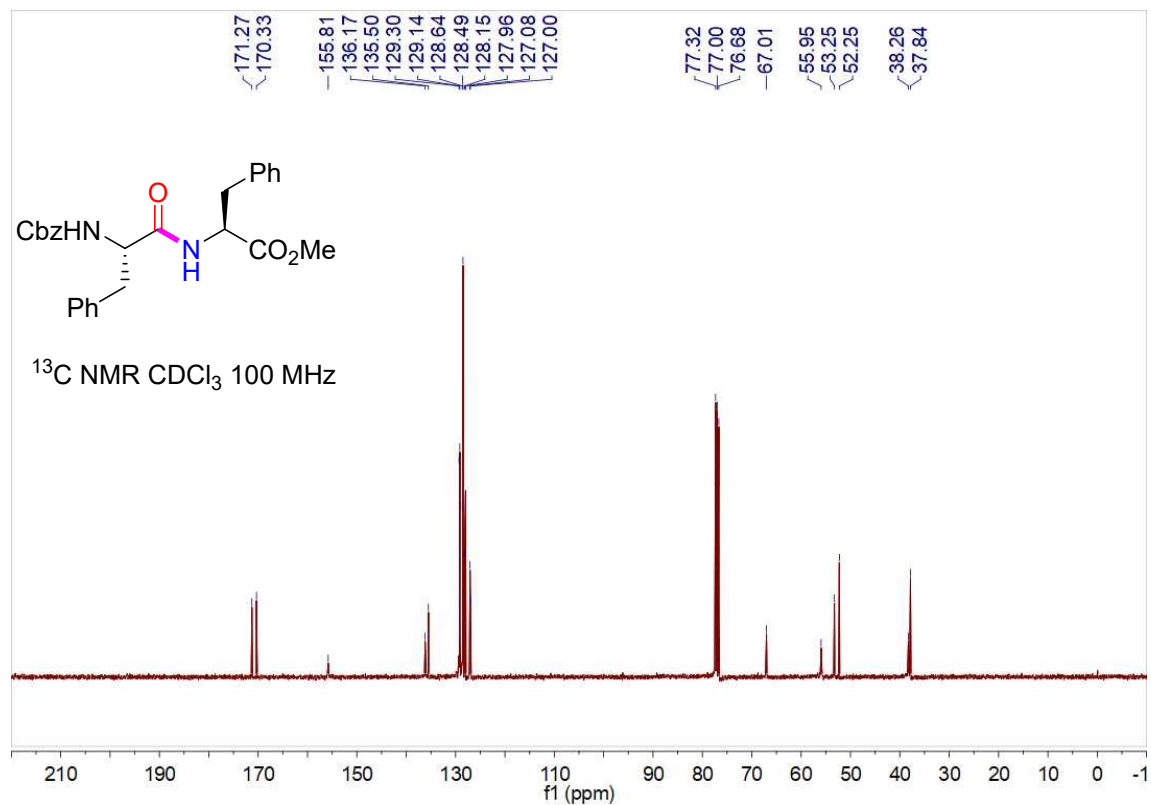

### Chromatogram

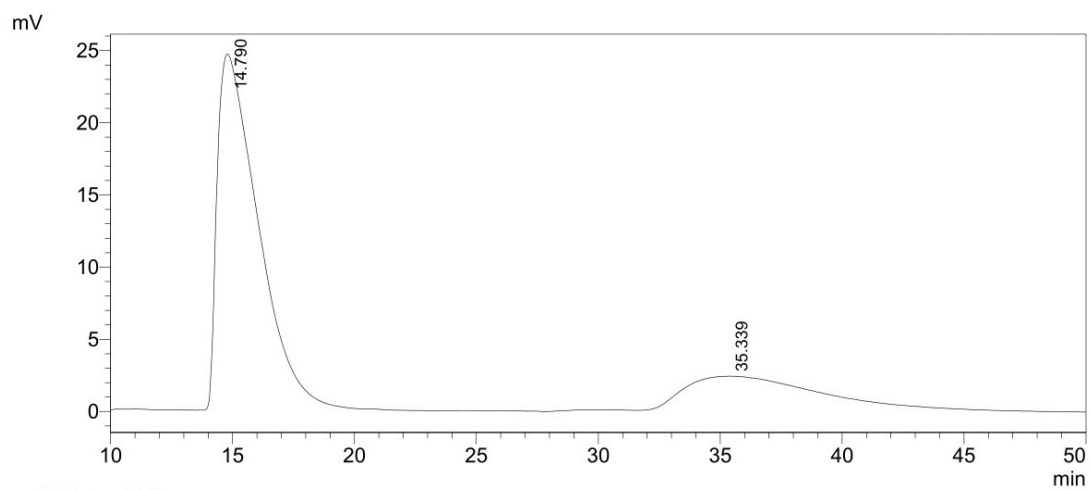

| Peak No | Ret. Time | Area    | Height | Area %  | Height% |
|---------|-----------|---------|--------|---------|---------|
| 1       | 14.790    | 2784034 | 24498  | 74.995  | 91.176  |
| 2       | 35.339    | 928270  | 2371   | 25.005  | 8.824   |
| Total   |           | 3712304 | 26869  | 100.000 | 100.000 |

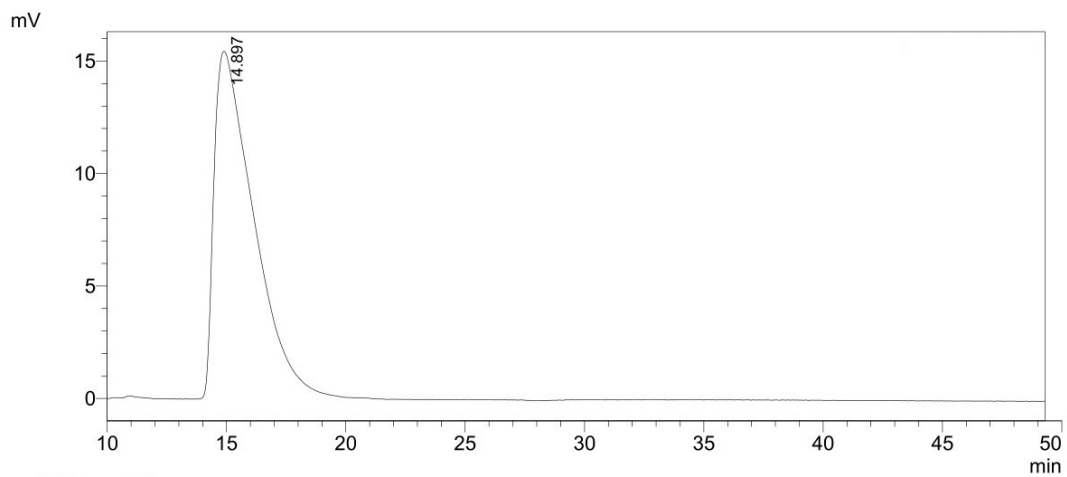

| Peak No | Ret. Time | Area    | Height | Area %  | Height% |
|---------|-----------|---------|--------|---------|---------|
| 1       | 14.897    | 1736436 | 15392  | 100.000 | 100.000 |
| Total   |           | 1736436 | 15392  | 100.000 | 100.000 |

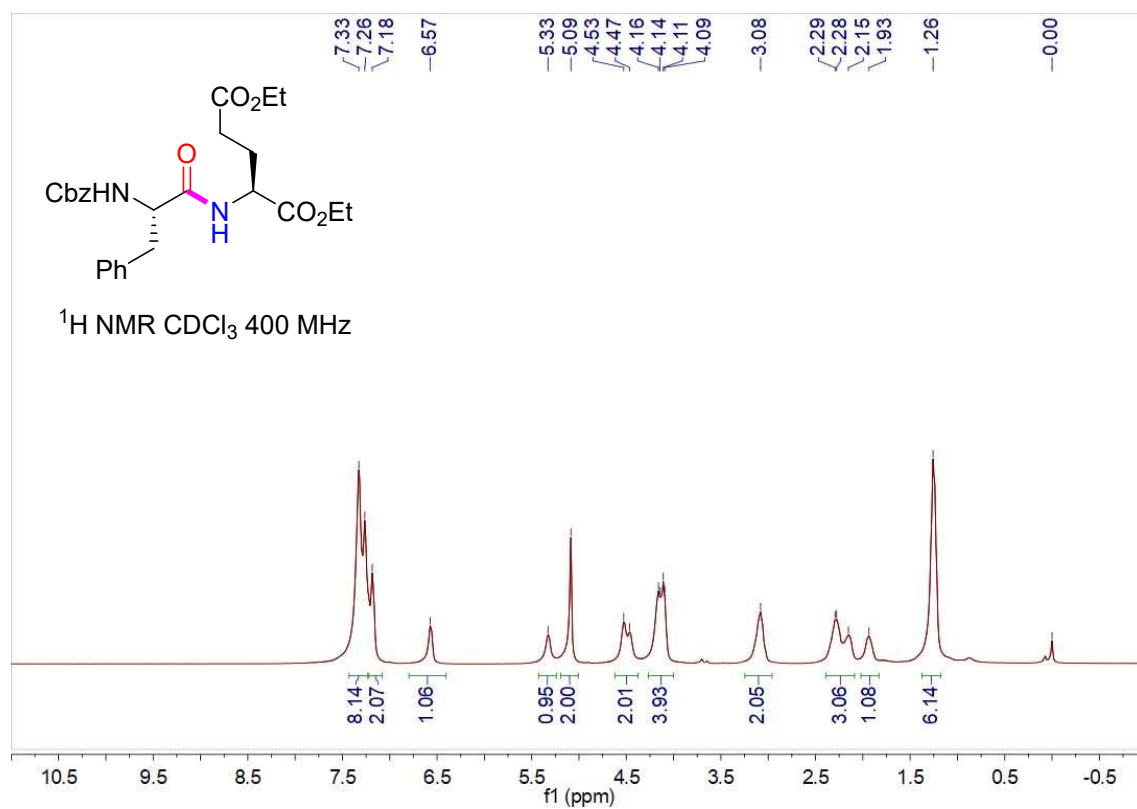

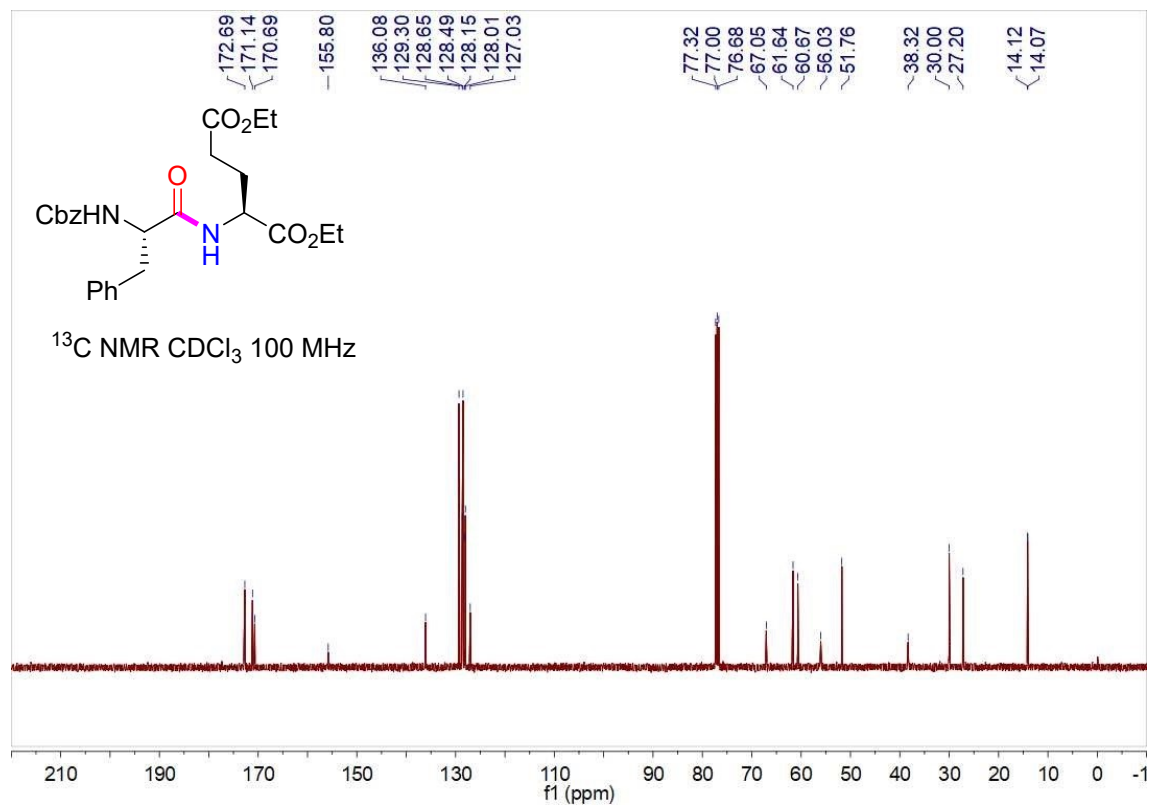

### Chromatogram

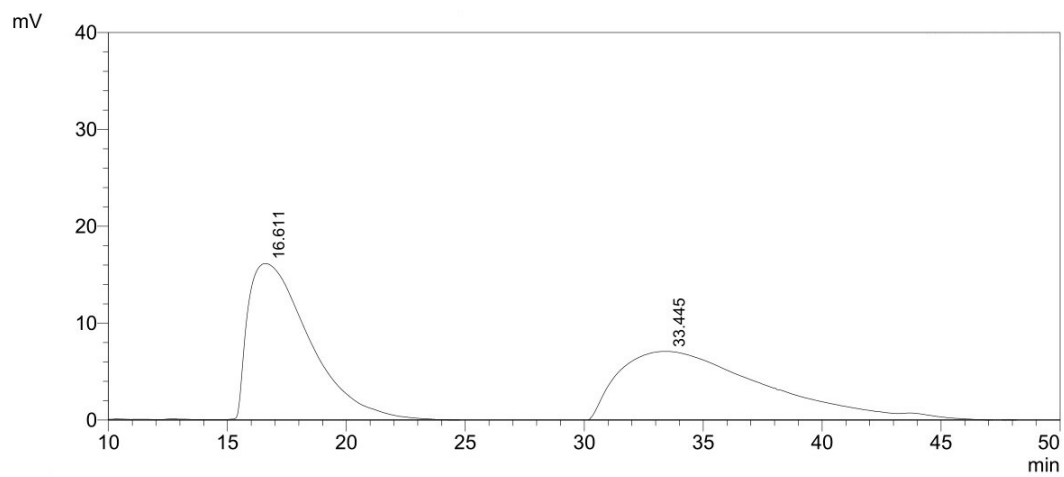

| Peak No | Ret. Time | Area    | Height | Area %  | Height% |
|---------|-----------|---------|--------|---------|---------|
| 1       | 16.611    | 2817232 | 16021  | 51.212  | 69.686  |
| 2       | 33.445    | 2683929 | 6969   | 48.788  | 30.314  |
| Total   |           | 5501161 | 22990  | 100.000 | 100.000 |

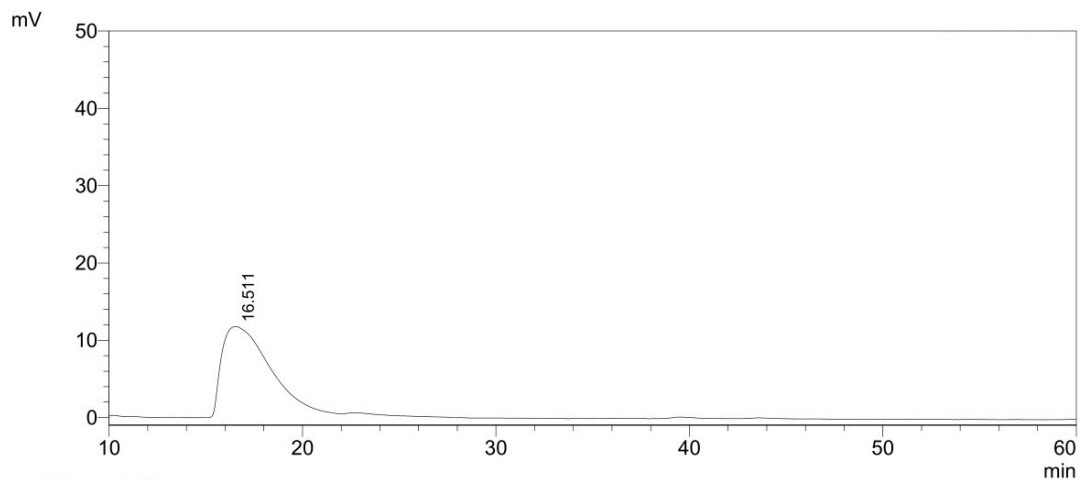

| Peak No | Ret. Time | Area    | Height | Area %  | Height% |
|---------|-----------|---------|--------|---------|---------|
| 1       | 16.511    | 1989921 | 11656  | 100.000 | 100.000 |
| Total   |           | 1989921 | 11656  | 100.000 | 100.000 |

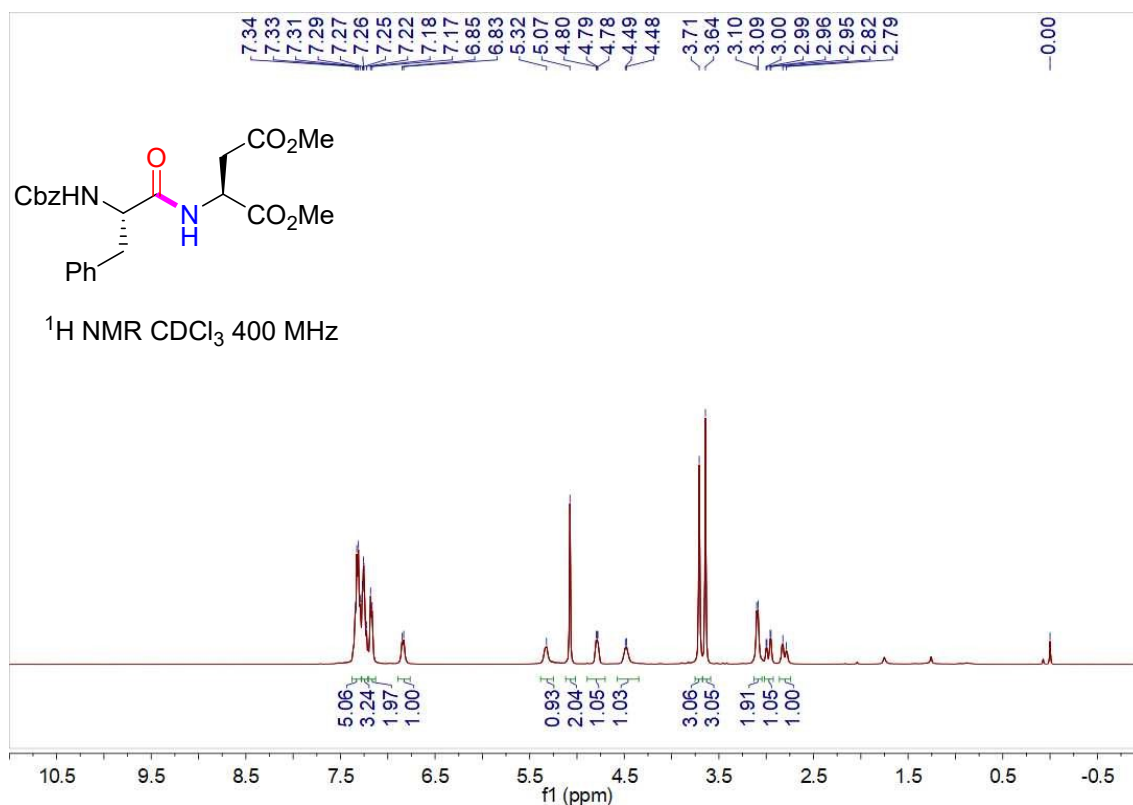

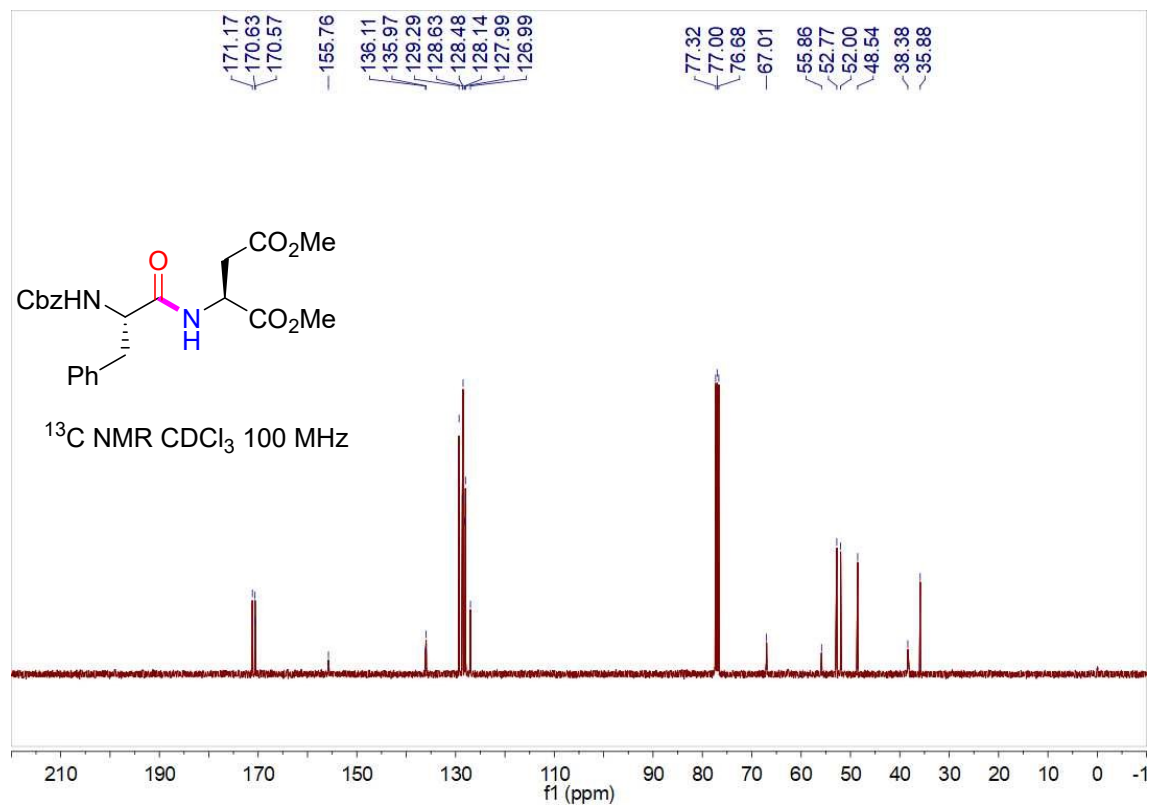

### Chromatogram

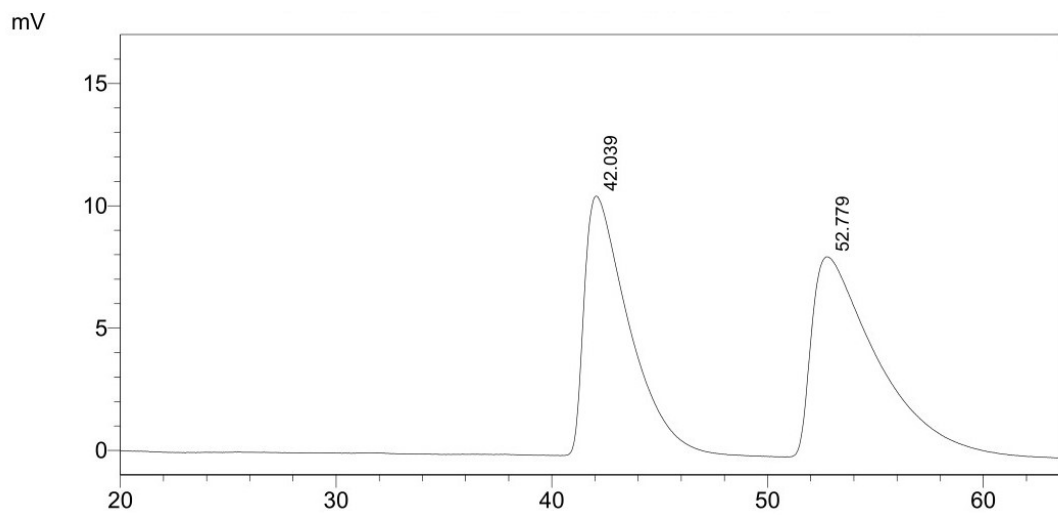

| Peak No | Ret. Time | Area    | Height | Area %  | Height% |
|---------|-----------|---------|--------|---------|---------|
| 1       | 42.039    | 1496503 | 10559  | 51.519  | 58.263  |
| 2       | 52.779    | 1408274 | 7564   | 48.481  | 41.737  |
| Total   |           | 2904777 | 18122  | 100.000 | 100.000 |

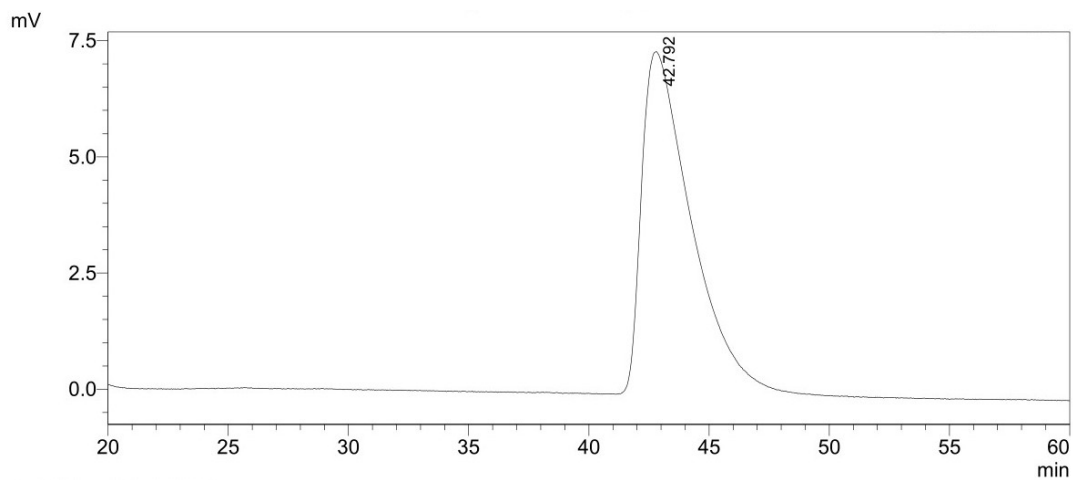

| Peak No | Ret. Time | Area   | Height | Area %  | Height% |
|---------|-----------|--------|--------|---------|---------|
| 1       | 42.792    | 909497 | 6918   | 100.000 | 100.000 |
| Total   |           | 909497 | 6918   | 100.000 | 100.000 |

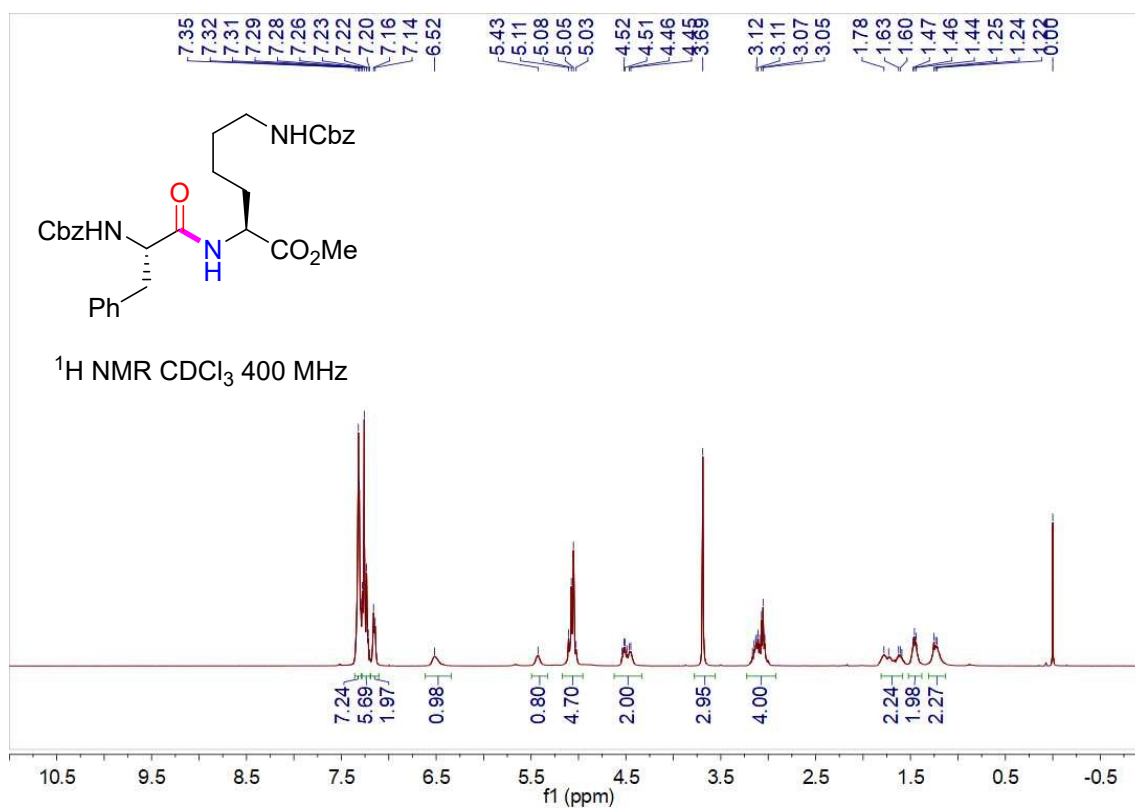

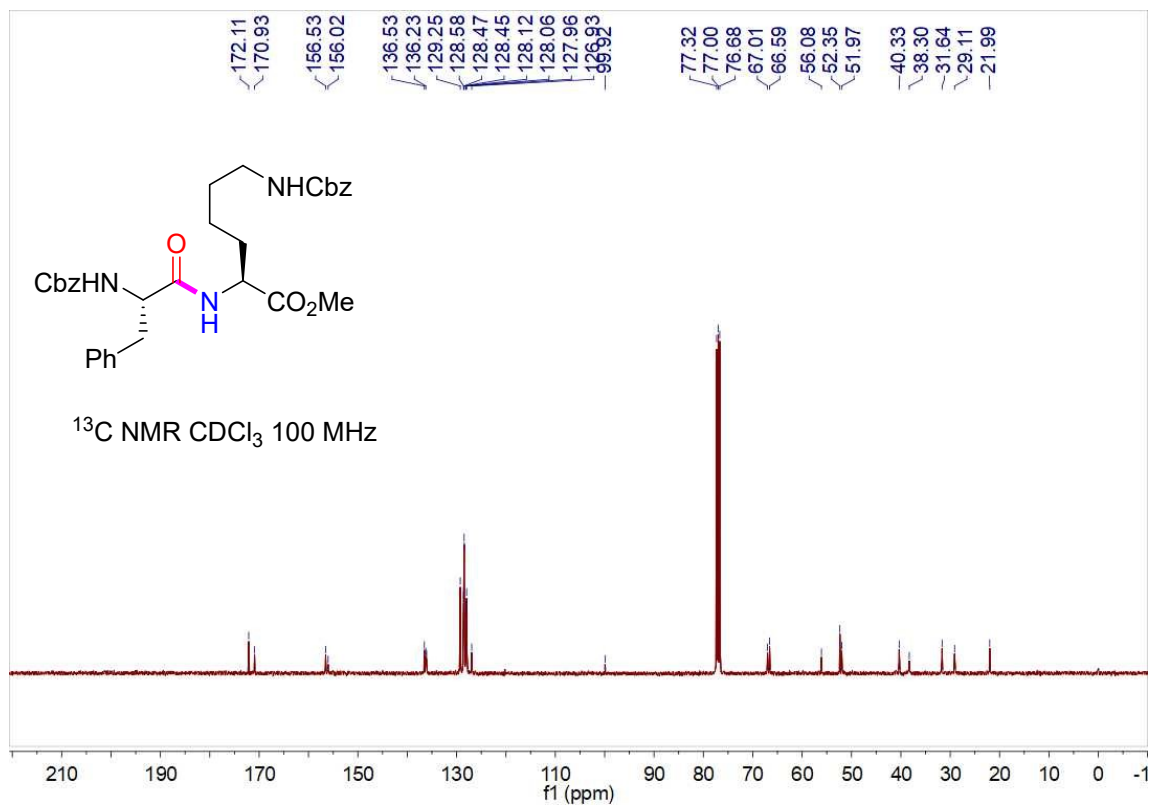

### Chromatogram (NIS-NHC)

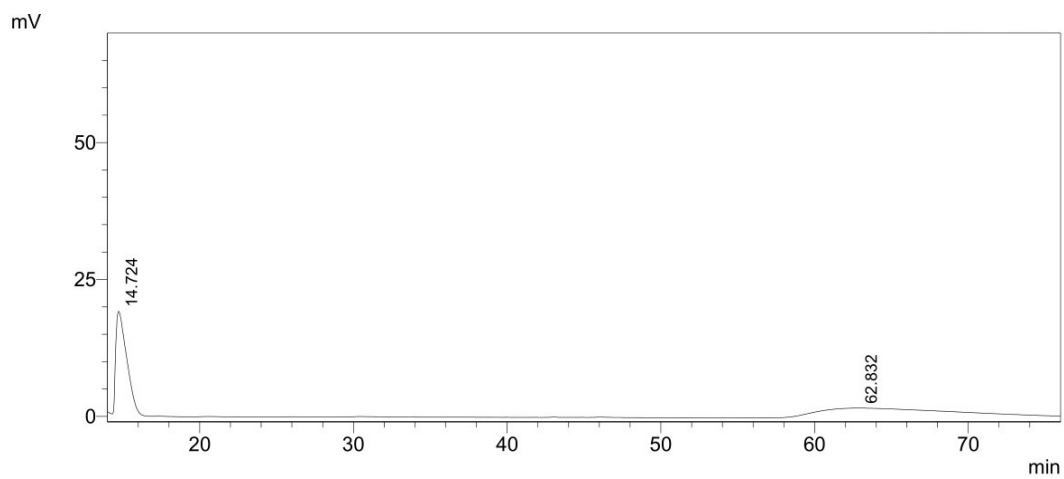

| Peak No | Ret. Time | Area    | Height | Area %  | Height% |
|---------|-----------|---------|--------|---------|---------|
| 1       | 14.724    | 871845  | 18537  | 48.883  | 91.907  |
| 2       | 62.832    | 911696  | 1632   | 51.117  | 8.093   |
| Total   |           | 1783541 | 20169  | 100.000 | 100.000 |

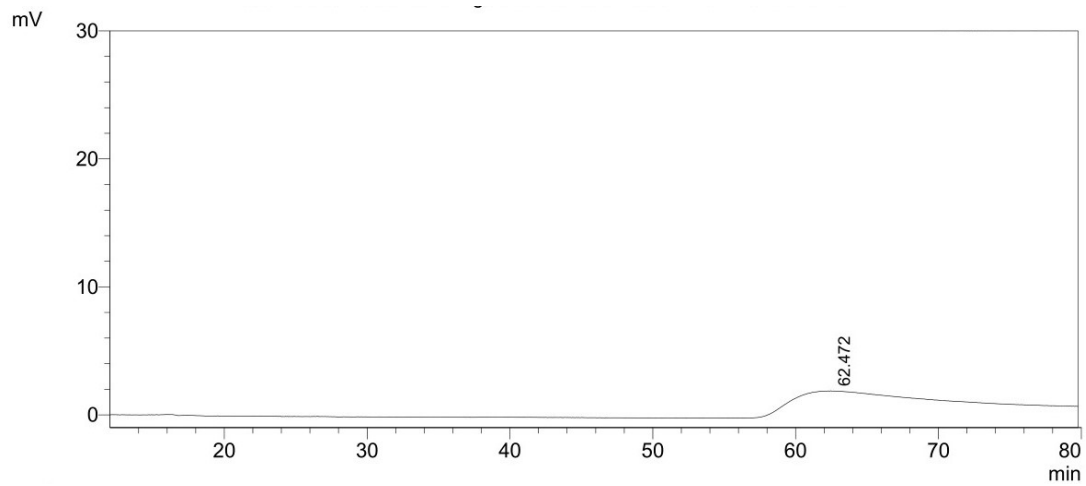

| Peak No | Ret. Time | Area   | Height | Area %  | Height% |
|---------|-----------|--------|--------|---------|---------|
| 1       | 62.472    | 681376 | 1230   | 100.000 | 100.000 |
| Total   |           | 681376 | 1230   | 100.000 | 100.000 |

Chromatogram (K<sub>2</sub>S<sub>2</sub>O<sub>8</sub>-NHC)

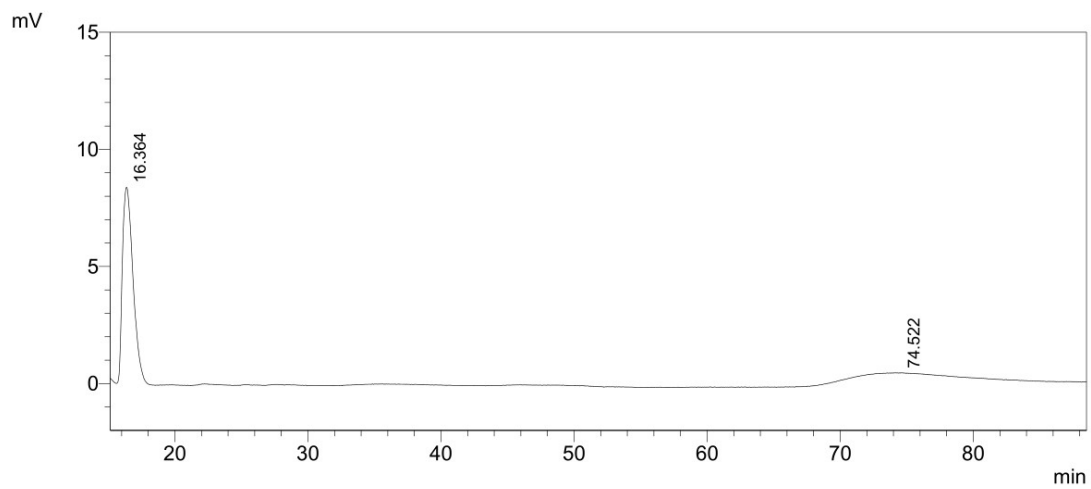

| Peak No | Ret. Time | Area   | Height | Area %  | Height% |
|---------|-----------|--------|--------|---------|---------|
| 1       | 16.364    | 342408 | 7333   | 49.817  | 93.392  |
| 2       | 74.522    | 344920 | 519    | 50.183  | 6.608   |
| Total   |           | 687328 | 7852   | 100.000 | 100.000 |



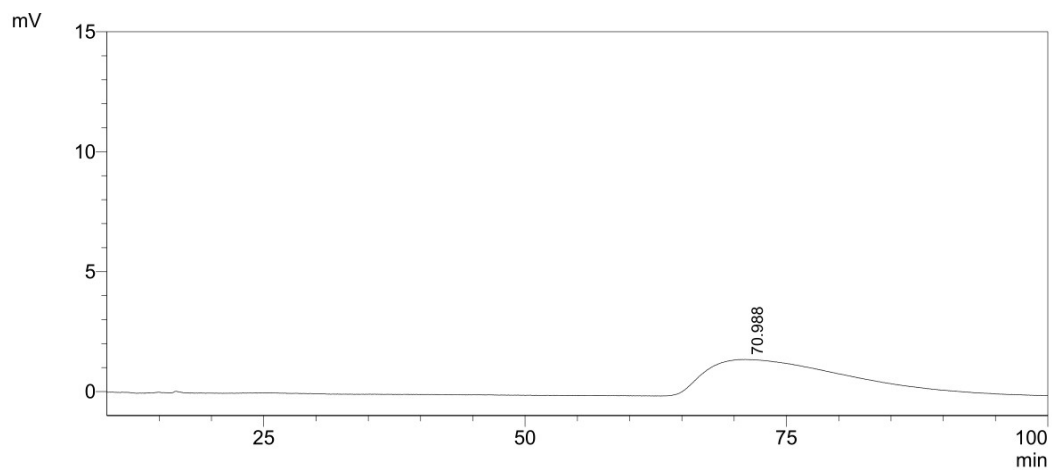

| Peak No | Ret. Time | Area   | Height | Area %  | Height% |
|---------|-----------|--------|--------|---------|---------|
| 1       | 70.988    | 310789 | 564    | 100.000 | 100.000 |
| Total   |           | 310789 | 564    | 100.000 | 100.000 |

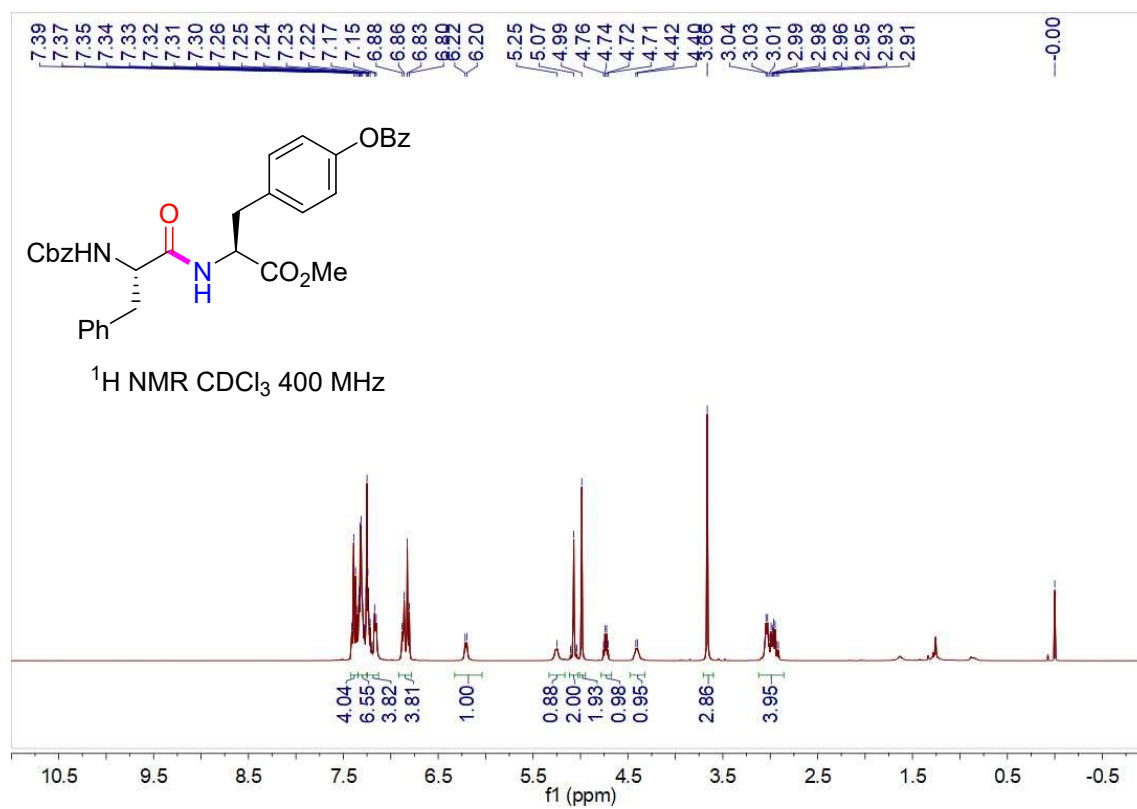

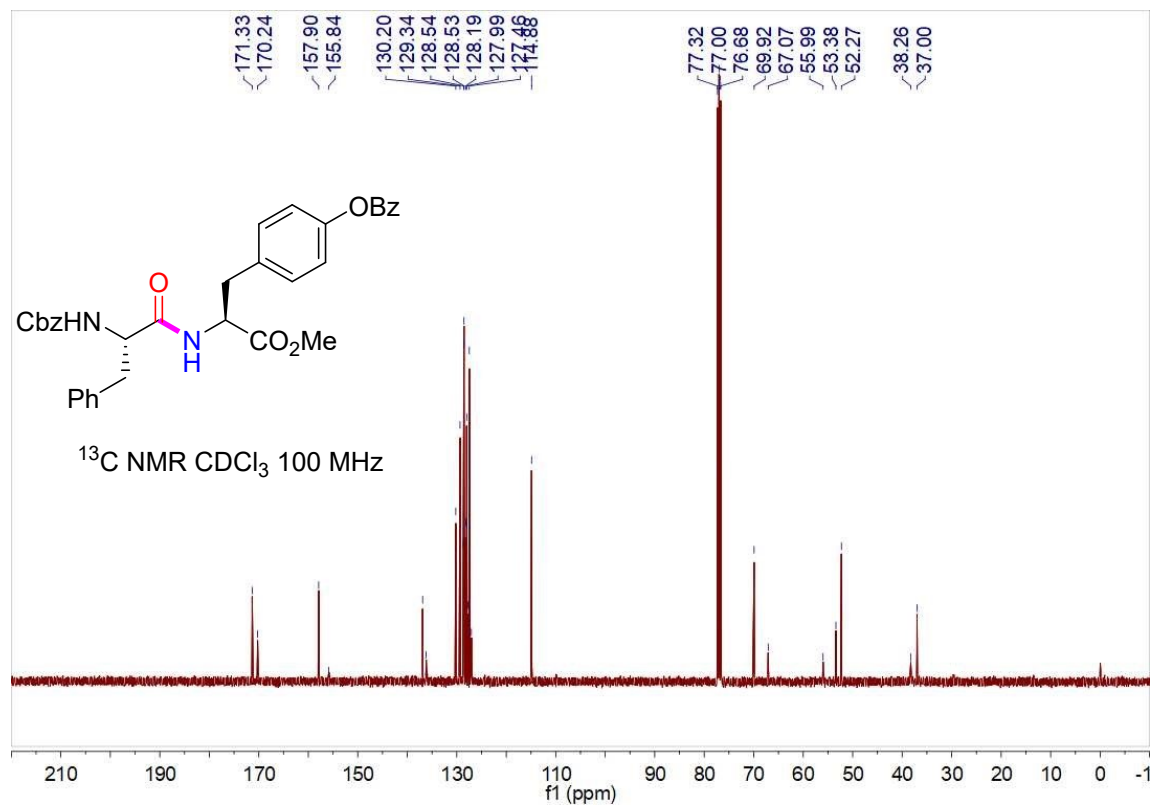

Chromatogram

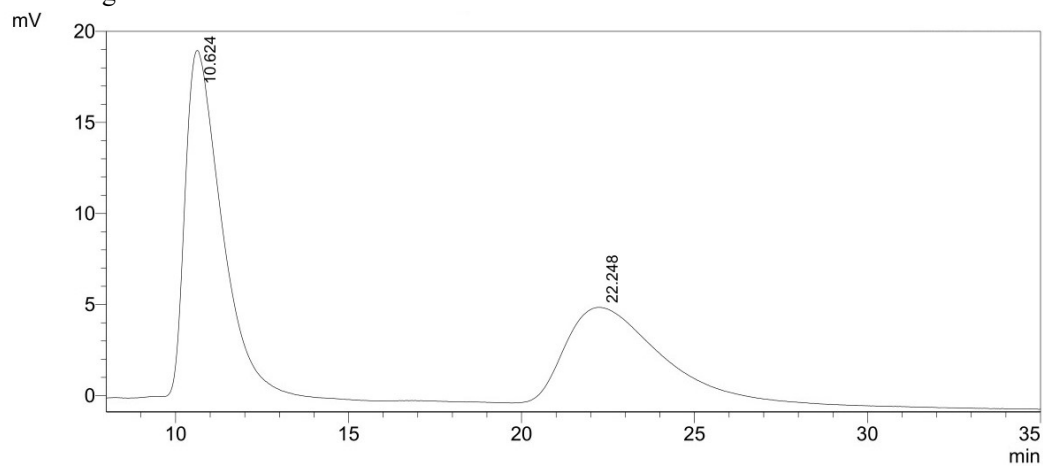

| Peak No | Ret. Time | Area    | Height | Area %  | Height% |
|---------|-----------|---------|--------|---------|---------|
| 1       | 10.624    | 950869  | 15467  | 48.505  | 74.611  |
| 2       | 22.248    | 1009465 | 5263   | 51.495  | 25.389  |
| Total   |           | 1960334 | 20731  | 100.000 | 100.000 |

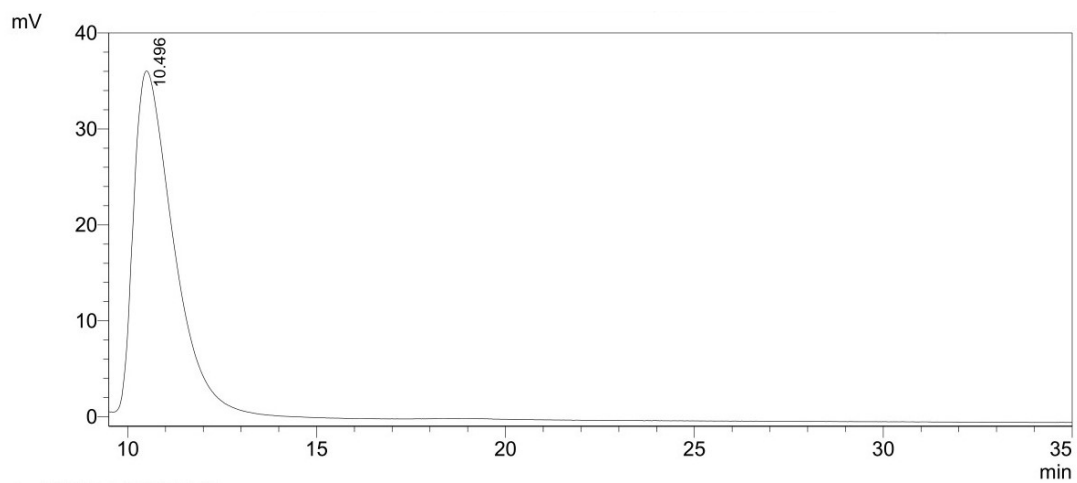

| Peak No | Ret. Time | Area    | Height | Area %  | Height% |
|---------|-----------|---------|--------|---------|---------|
| 1       | 10.496    | 2485433 | 35377  | 100.000 | 100.000 |
| Total   |           | 2485433 | 35377  | 100.000 | 100.000 |

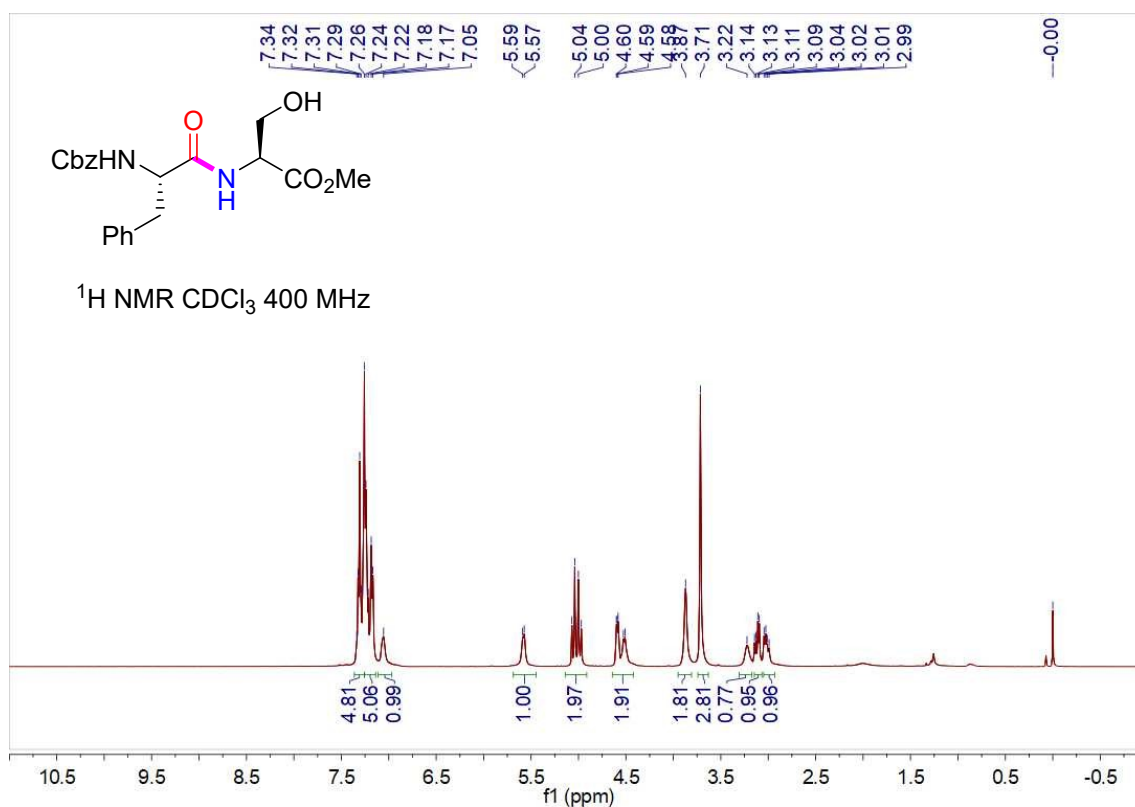

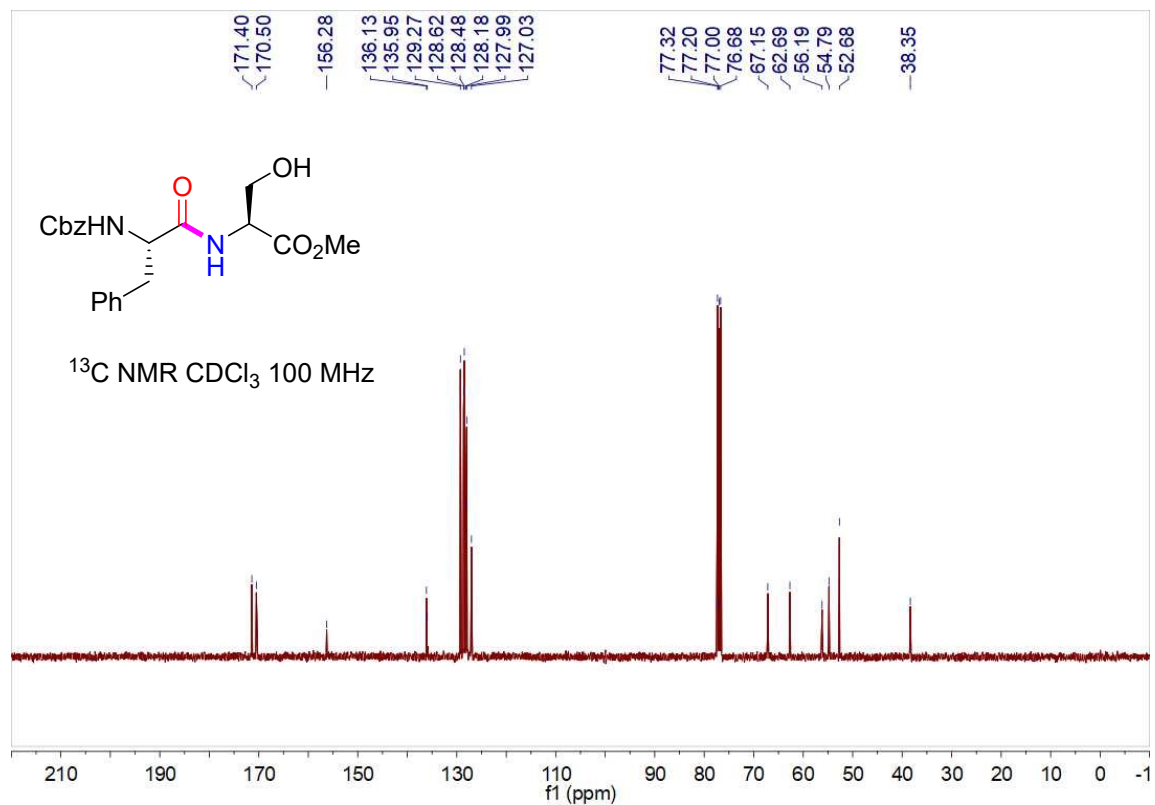

Chromatogram (NIS-NHC)

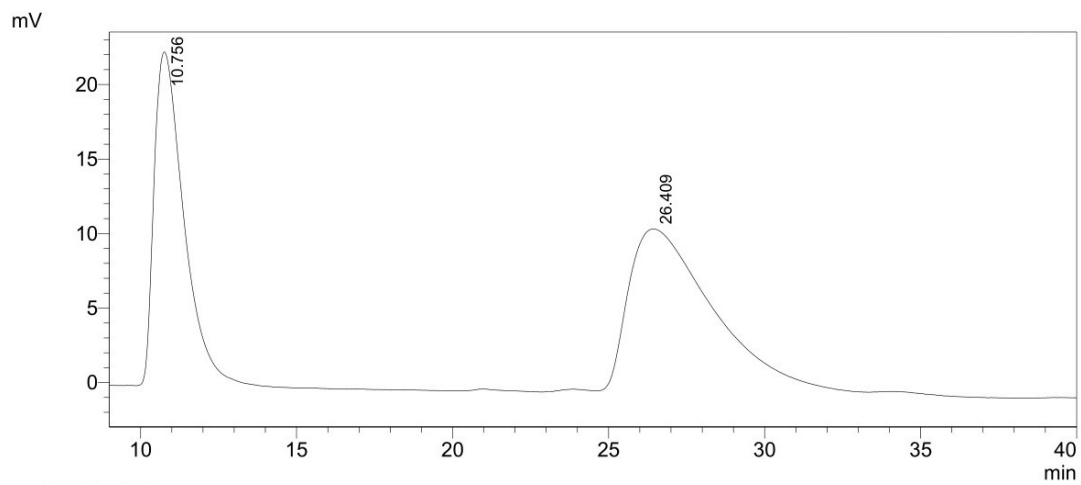

| Peak No | Ret. Time | Area    | Height | Area %  | Height% |
|---------|-----------|---------|--------|---------|---------|
| 1       | 10.756    | 1497161 | 22414  | 45.900  | 68.147  |
| 2       | 26.409    | 1764651 | 10476  | 54.100  | 31.853  |
| Total   |           | 3261812 | 32890  | 100.000 | 100.000 |

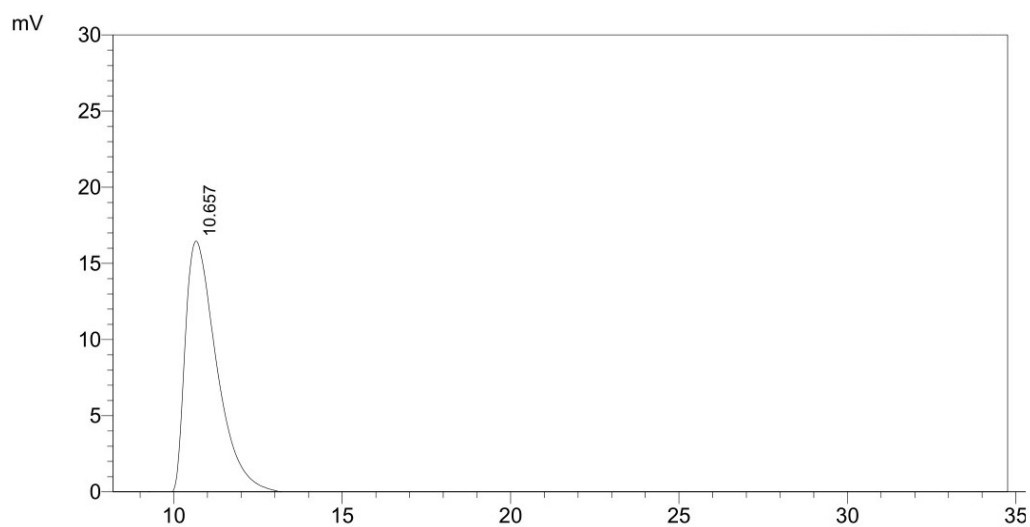

| Peak No | Ret. Time | Area    | Height | Area %  | Height% |
|---------|-----------|---------|--------|---------|---------|
| 1       | 10.657    | 1077705 | 16534  | 100.000 | 100.000 |
| Total   |           | 1077705 | 16534  | 100.000 | 100.000 |

Chromatogram (K<sub>2</sub>S<sub>2</sub>O<sub>8</sub>-NHC)

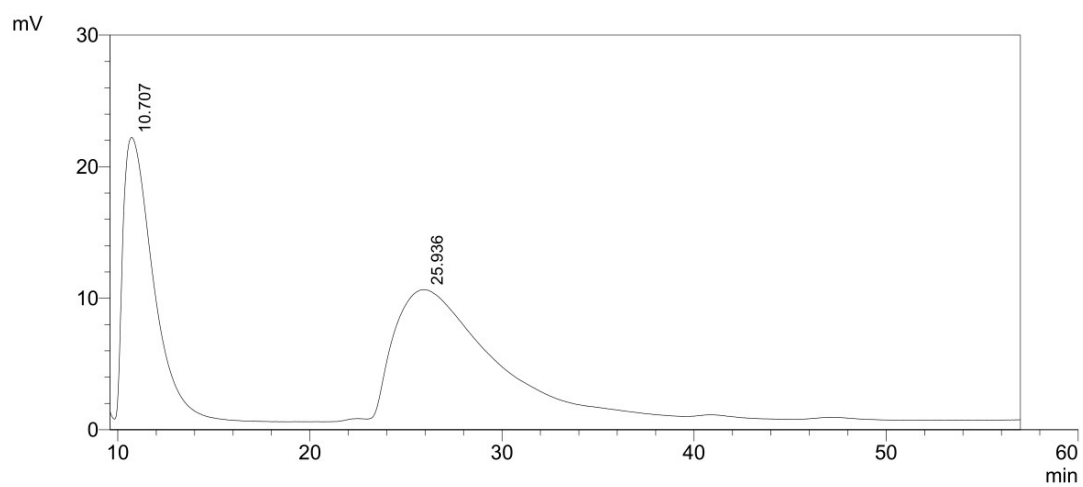

| Peak No | Ret. Time | Area    | Height | Area %  | Height% |
|---------|-----------|---------|--------|---------|---------|
| 1       | 10.707    | 2306057 | 21374  | 49.234  | 71.764  |
| 2       | 25.936    | 2377809 | 8410   | 50.766  | 28.236  |
| Total   |           | 4683865 | 29784  | 100.000 | 100.000 |

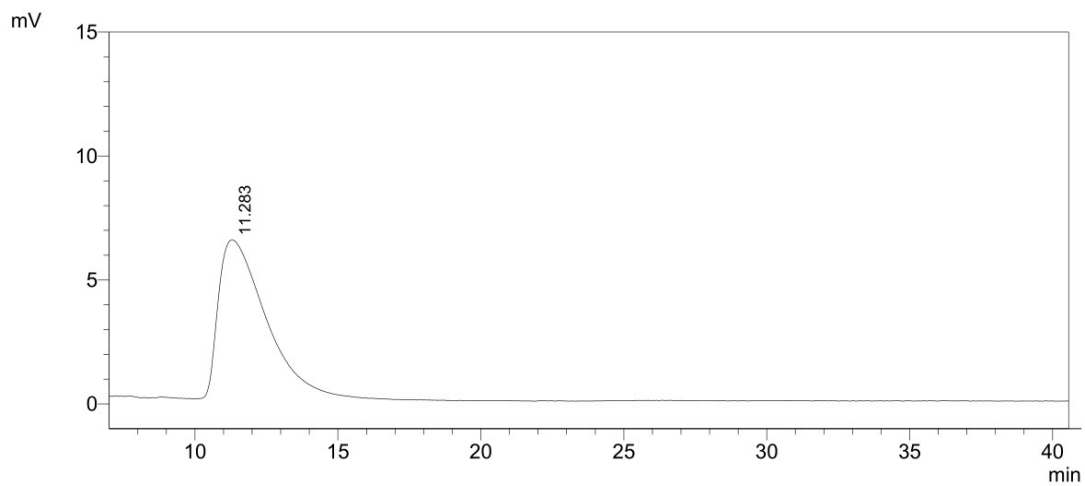

| Peak No | Ret. Time | Area   | Height | Area %  | Height% |
|---------|-----------|--------|--------|---------|---------|
| 1       | 11.283    | 719815 | 6385   | 100.000 | 100.000 |
| Total   |           | 719815 | 6385   | 100.000 | 100.000 |

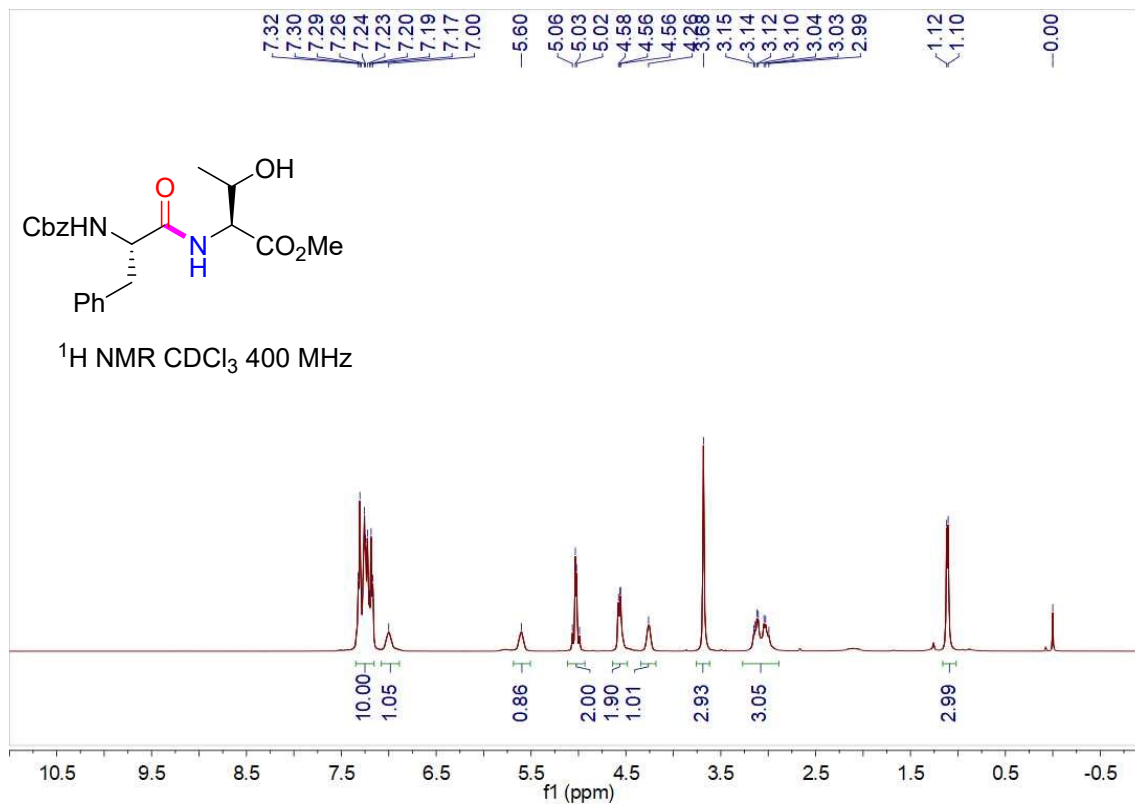

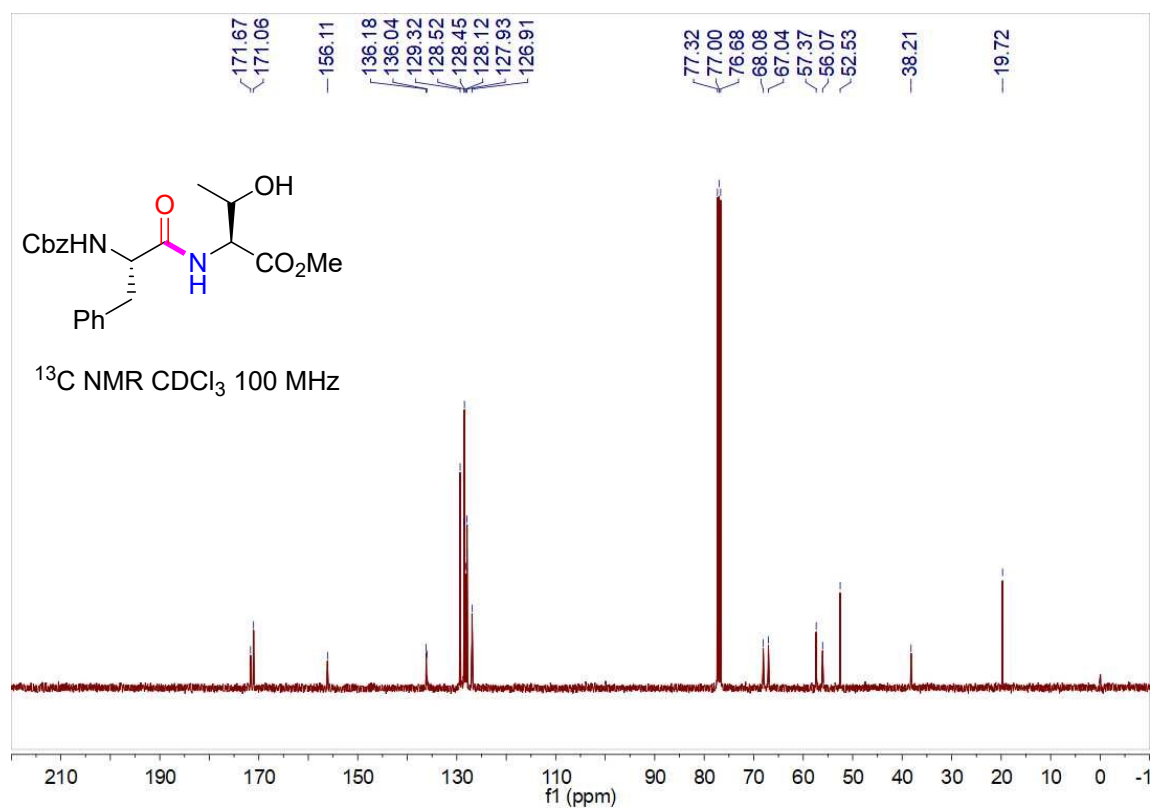

Chromatogram  
mV

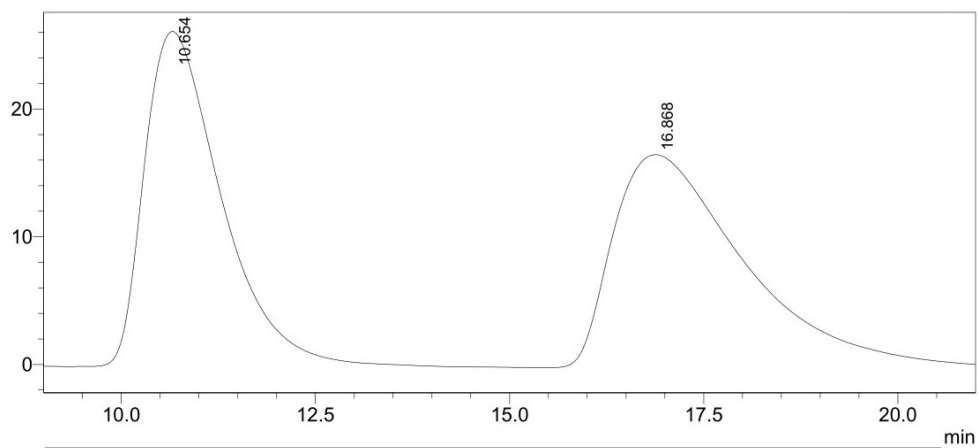

| Peak No | Ret. Time | Area    | Height | Area %  | Height% |
|---------|-----------|---------|--------|---------|---------|
| 1       | 10.654    | 1782052 | 26173  | 48.418  | 61.217  |
| 2       | 16.868    | 1898543 | 16581  | 51.582  | 38.783  |
| Total   |           | 3680586 | 42754  | 100.000 | 100.000 |

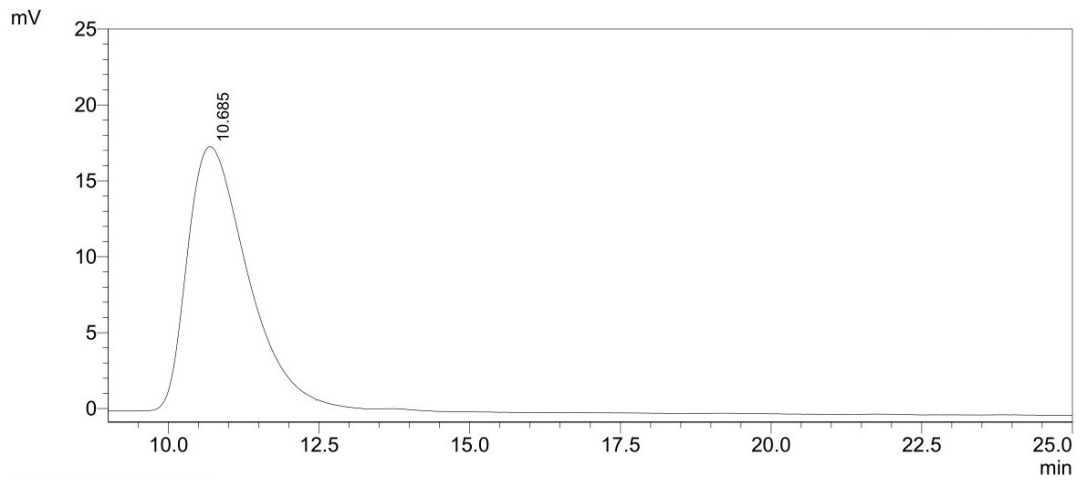

| Peak No | Ret. Time | Area    | Height | Area %  | Height% |
|---------|-----------|---------|--------|---------|---------|
| 1       | 10.685    | 1213656 | 17379  | 100.000 | 100.000 |
| Total   |           | 1213656 | 17379  | 100.000 | 100.000 |

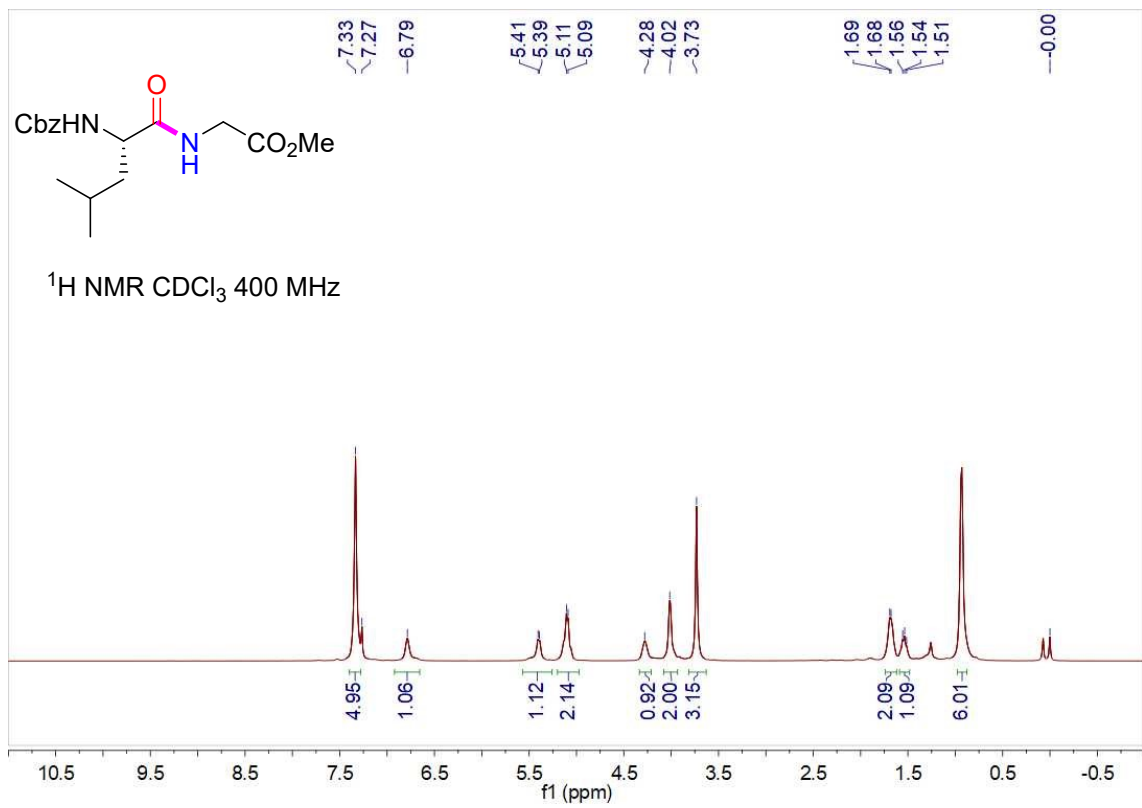



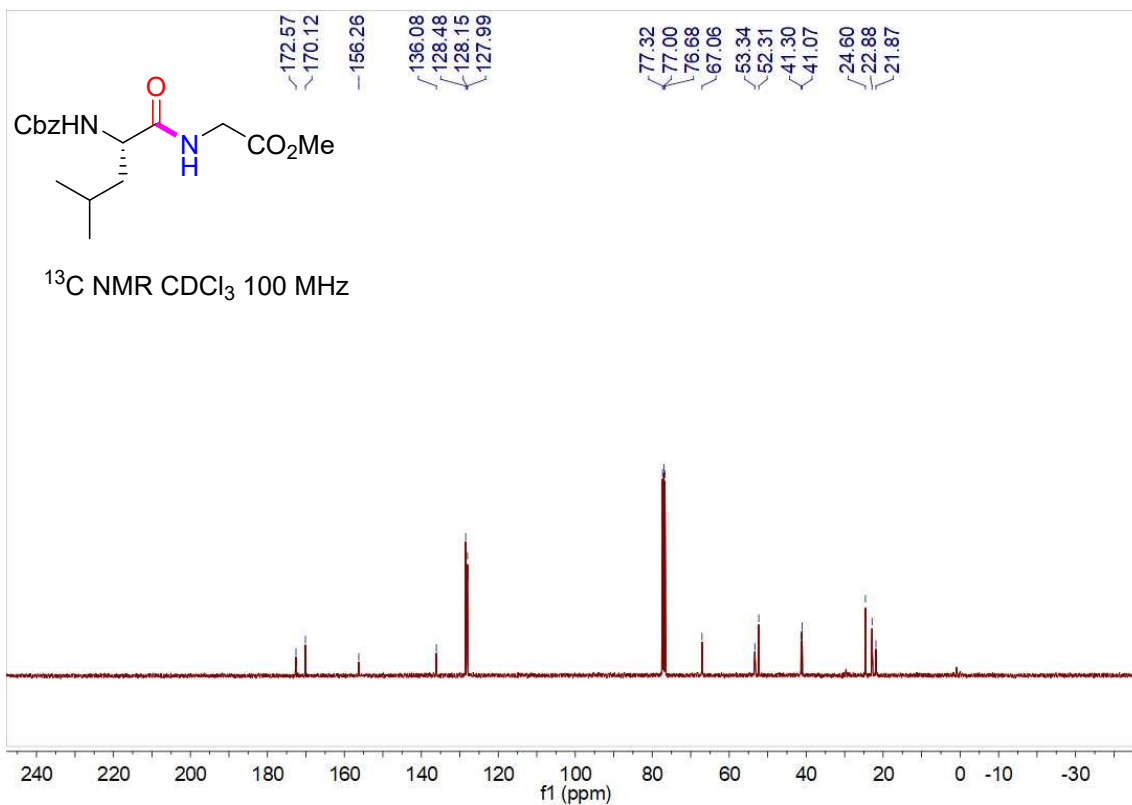

Chromatogram (NIS-NHC)

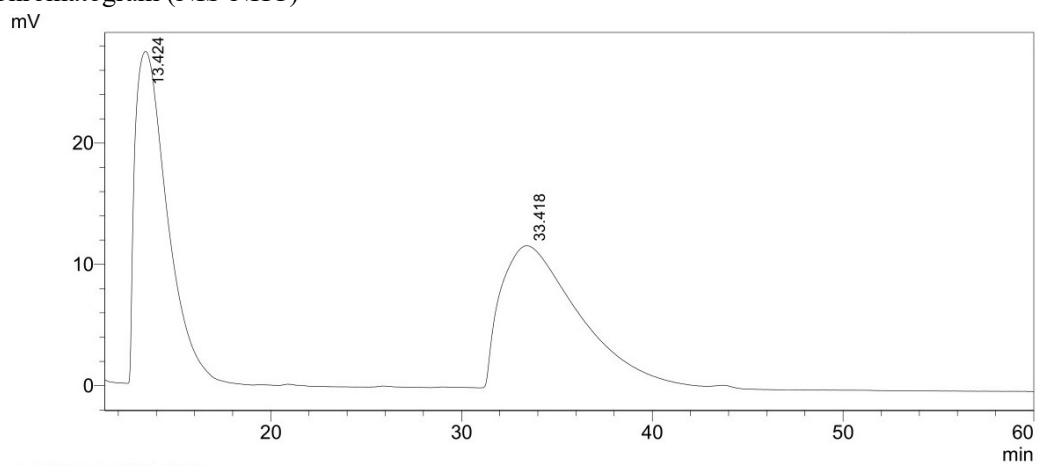

| Peak No | Ret. Time | Area    | Height | Area %  | Height% |
|---------|-----------|---------|--------|---------|---------|
| 1       | 13.424    | 3204722 | 27348  | 50.831  | 70.407  |
| 2       | 33.418    | 3099924 | 11495  | 49.169  | 29.593  |
| Total   |           | 6304645 | 38843  | 100.000 | 100.000 |

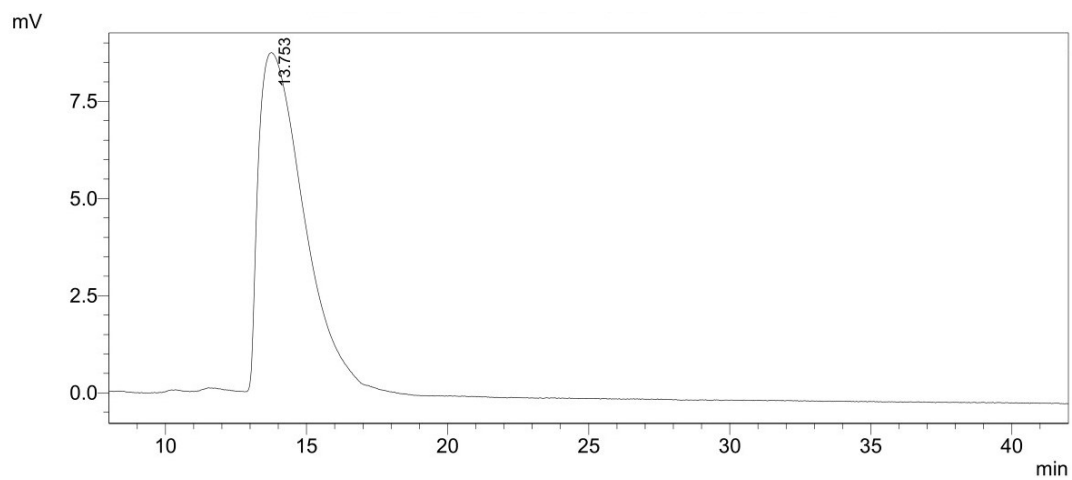

| Peak No | Ret. Time | Area   | Height | Area %  | Height% |
|---------|-----------|--------|--------|---------|---------|
| 1       | 13.753    | 975018 | 8720   | 100.000 | 100.000 |
| Total   |           | 975018 | 8720   | 100.000 | 100.000 |

Chromatogram (K<sub>2</sub>S<sub>2</sub>O<sub>8</sub>-NHC)

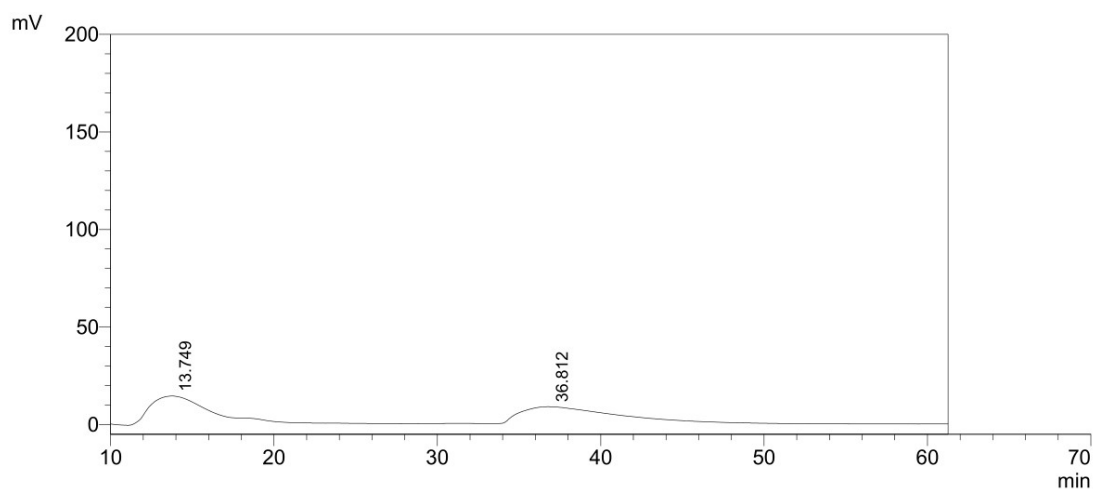

| Peak No | Ret. Time | Area    | Height | Area %  | Height% |
|---------|-----------|---------|--------|---------|---------|
| 1       | 13.749    | 3121719 | 13975  | 49.711  | 62.424  |
| 2       | 36.812    | 3157987 | 8412   | 50.289  | 37.576  |
| Total   |           | 6279707 | 22387  | 100.000 | 100.000 |

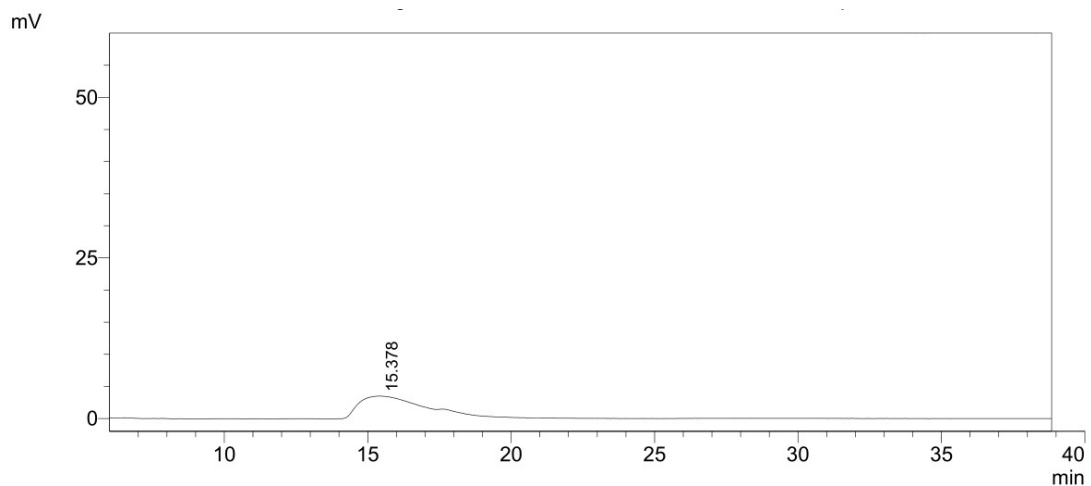

| Peak No | Ret. Time | Area   | Height | Area %  | Height% |
|---------|-----------|--------|--------|---------|---------|
| 1       | 15.378    | 543566 | 3409   | 100.000 | 100.000 |
| Total   |           | 543566 | 3409   | 100.000 | 100.000 |

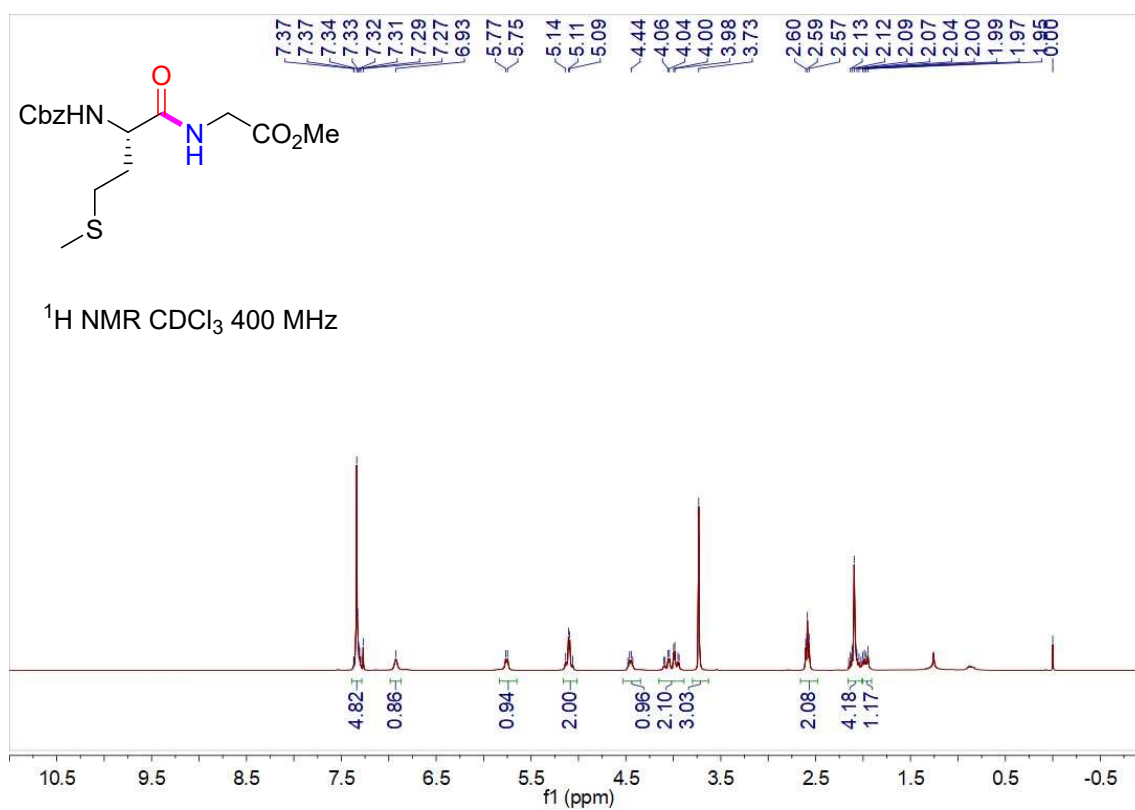

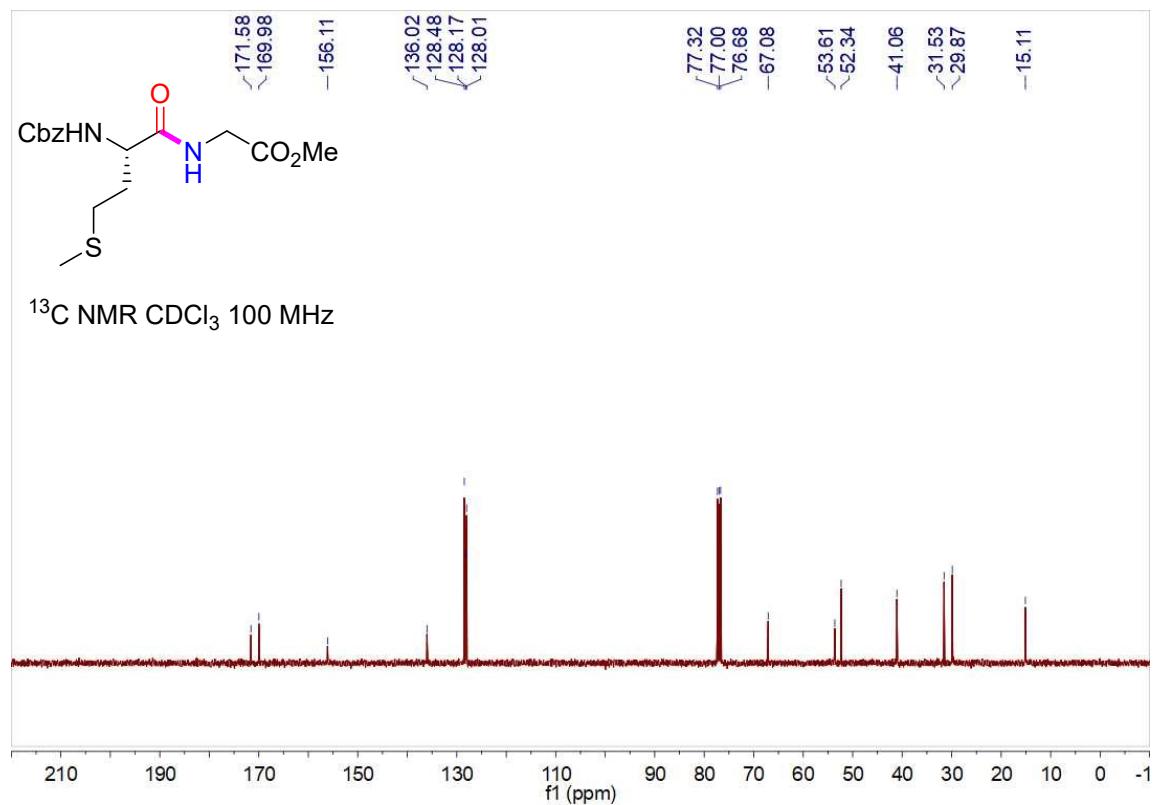

Chromatogram (NIS-NHC)

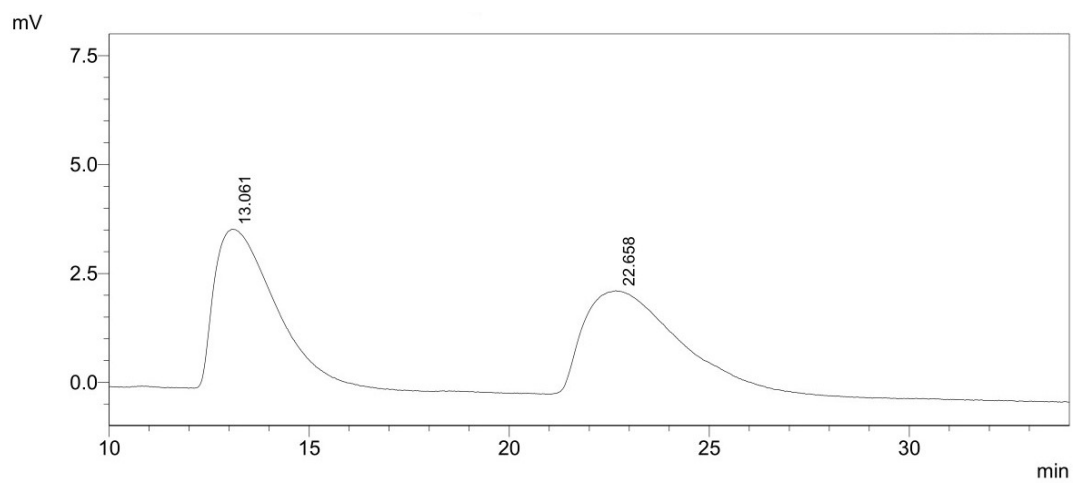

| Peak No | Ret. Time | Area   | Height | Area %  | Height% |
|---------|-----------|--------|--------|---------|---------|
| 1       | 13.061    | 386048 | 3649   | 49.141  | 60.492  |
| 2       | 22.658    | 399537 | 2383   | 50.859  | 39.508  |
| Total   |           | 785585 | 6032   | 100.000 | 100.000 |

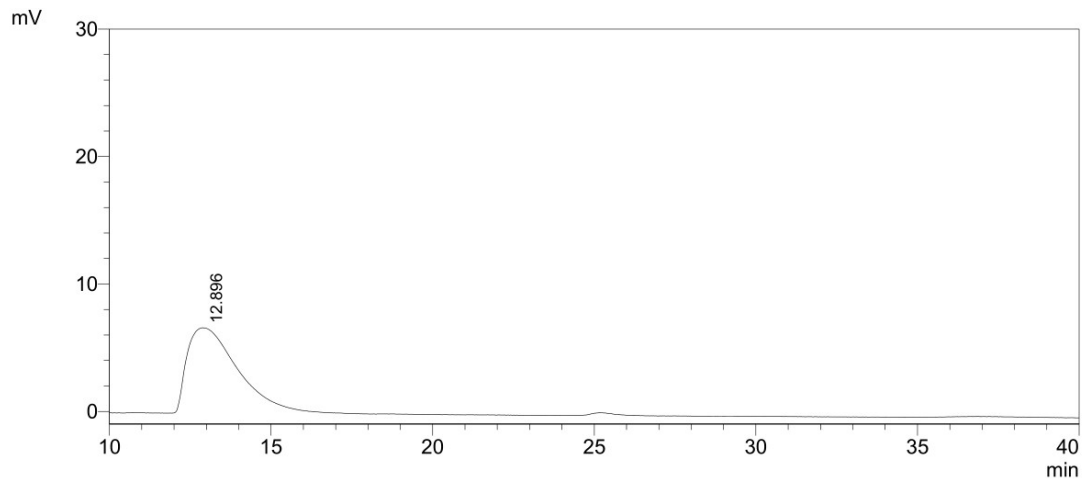

| Peak No | Ret. Time | Area   | Height | Area %  | Height% |
|---------|-----------|--------|--------|---------|---------|
| 1       | 12.896    | 741451 | 6709   | 100.000 | 100.000 |
| Total   |           | 741451 | 6709   | 100.000 | 100.000 |

Chromatogram (K<sub>2</sub>S<sub>2</sub>O<sub>8</sub>-NHC)

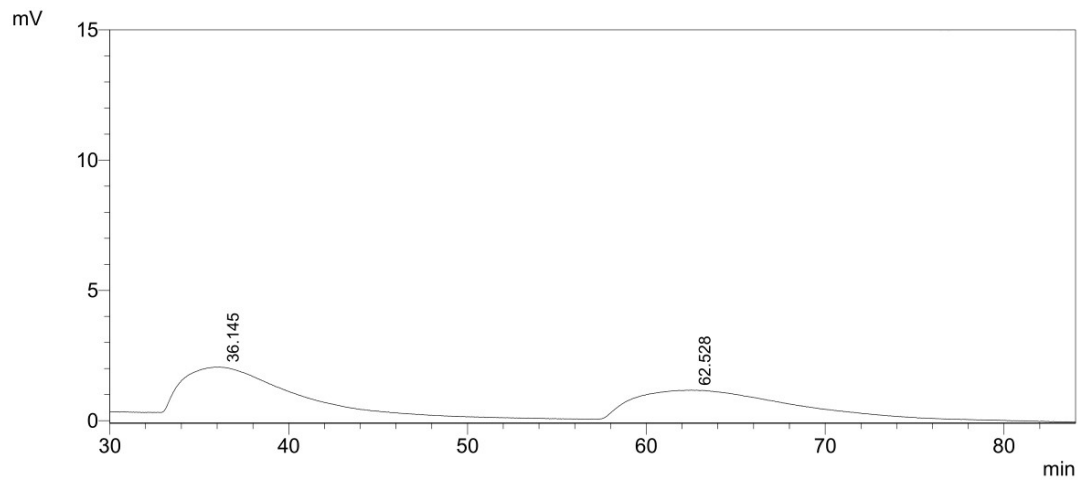

| Peak No | Ret. Time | Area    | Height | Area %  | Height% |
|---------|-----------|---------|--------|---------|---------|
| 1       | 36.145    | 679181  | 1756   | 50.826  | 61.256  |
| 2       | 62.528    | 657112  | 1111   | 49.174  | 38.744  |
| Total   |           | 1336293 | 2866   | 100.000 | 100.000 |

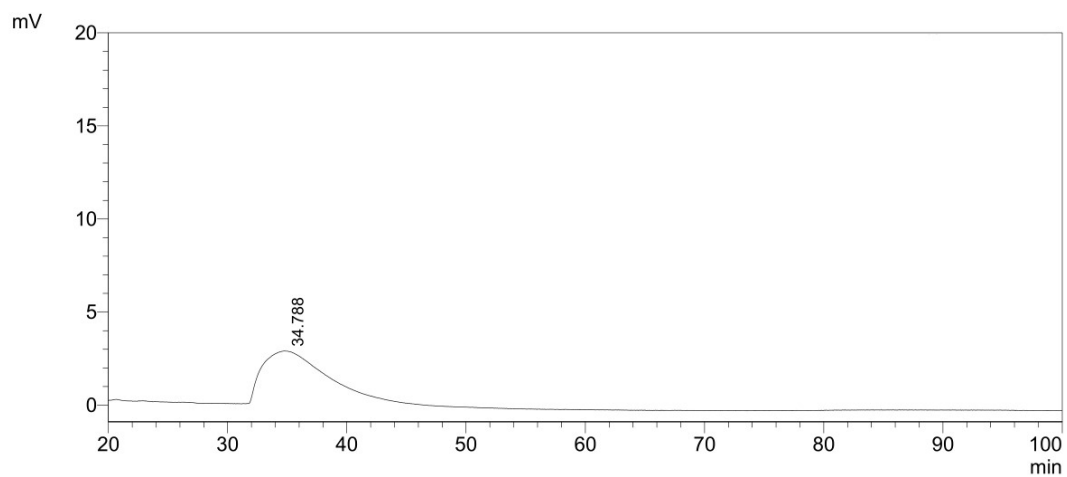

| Peak No | Ret. Time | Area    | Height | Area %  | Height% |
|---------|-----------|---------|--------|---------|---------|
| 1       | 34.788    | 1111325 | 2849   | 100.000 | 100.000 |
| Total   |           | 1111325 | 2849   | 100.000 | 100.000 |

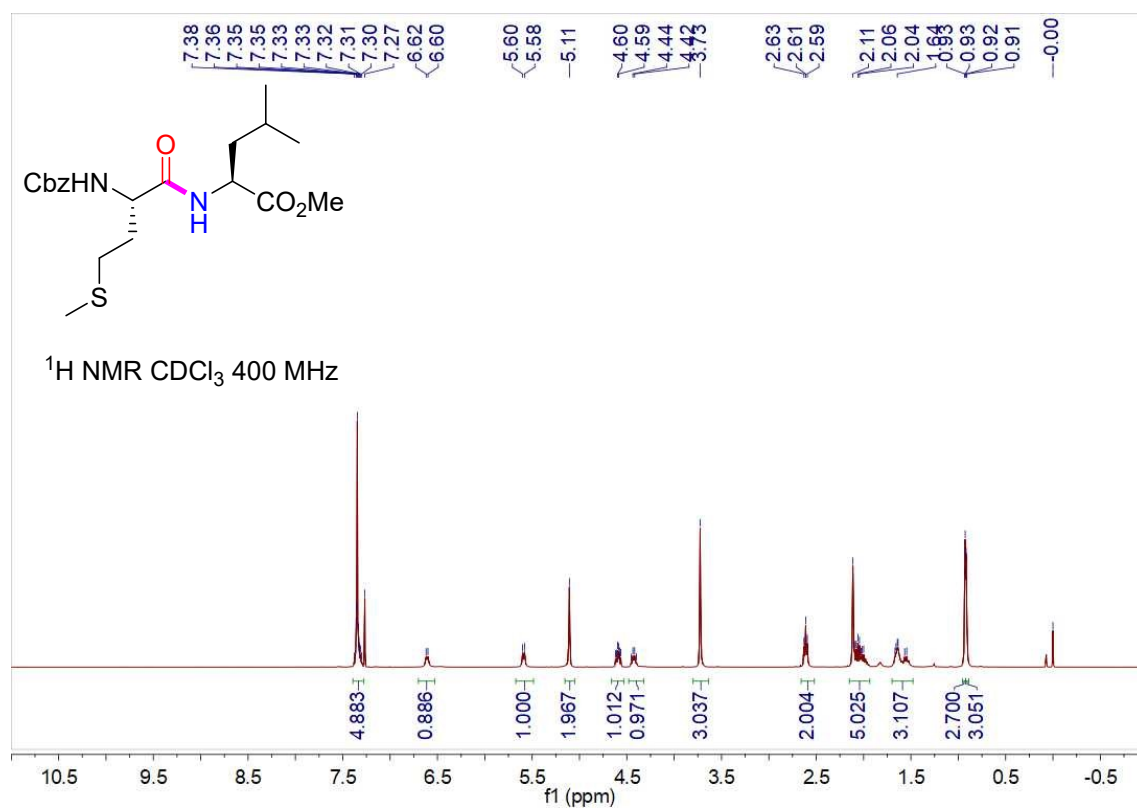

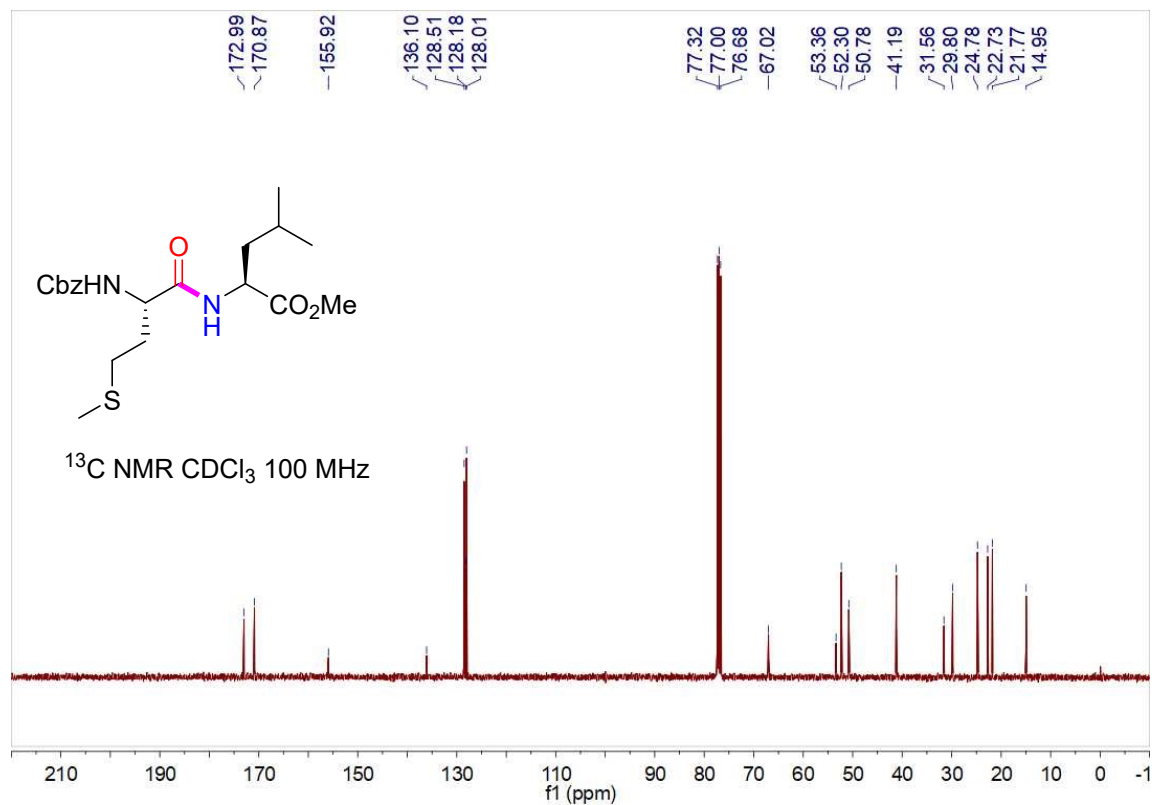

### Chromatogram

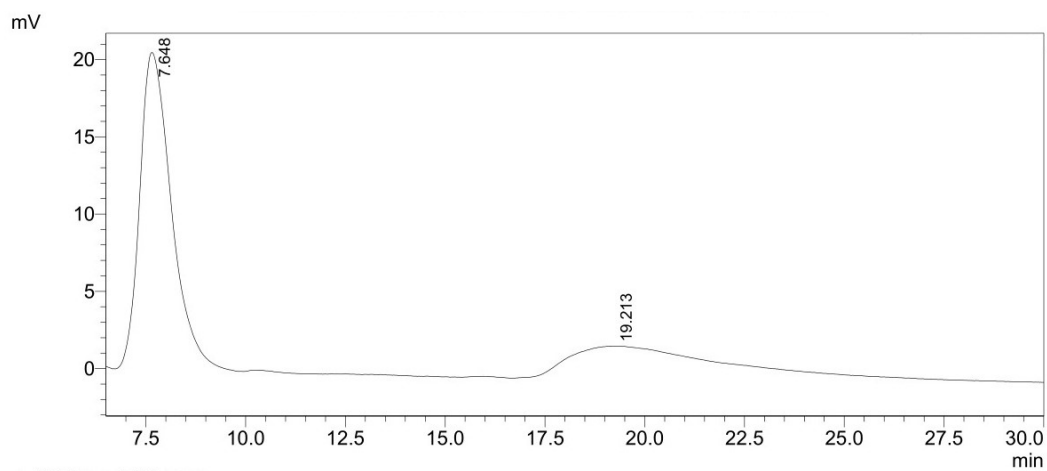

| Peak No | Ret. Time | Area    | Height | Area %  | Height% |
|---------|-----------|---------|--------|---------|---------|
| 1       | 7.648     | 588791  | 14354  | 50.068  | 87.216  |
| 2       | 19.213    | 587200  | 2104   | 49.932  | 12.784  |
| Total   |           | 1175992 | 16458  | 100.000 | 100.000 |

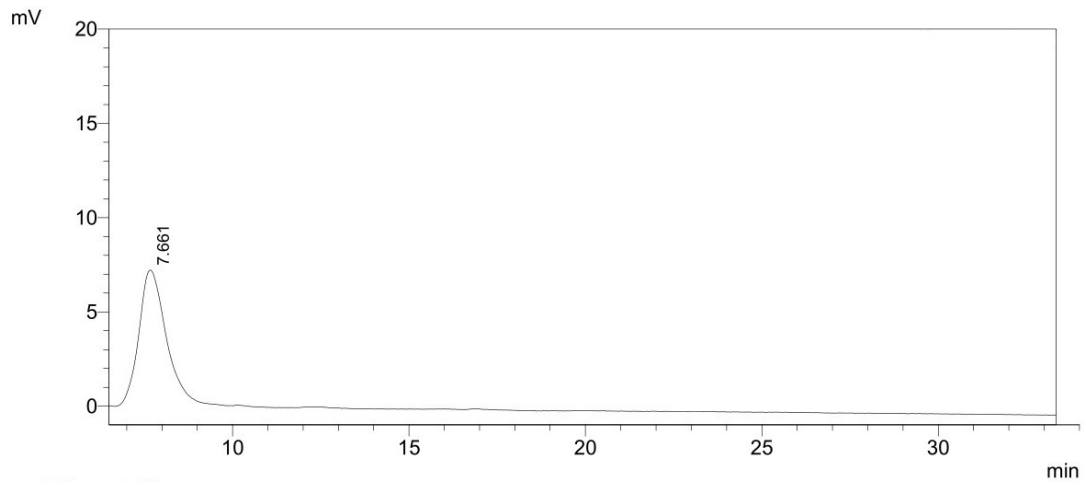

| Peak No | Ret. Time | Area   | Height | Area %  | Height% |
|---------|-----------|--------|--------|---------|---------|
| 1       | 7.661     | 392674 | 7213   | 100.000 | 100.000 |
| Total   |           | 392674 | 7213   | 100.000 | 100.000 |

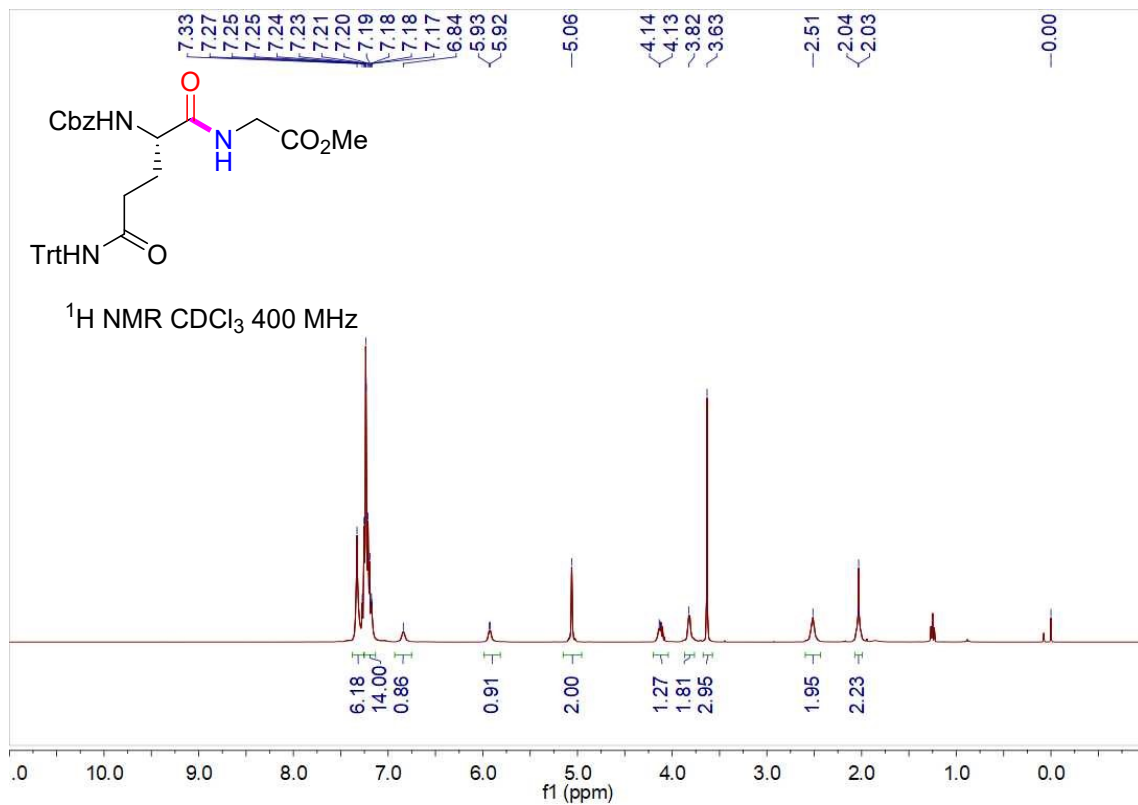



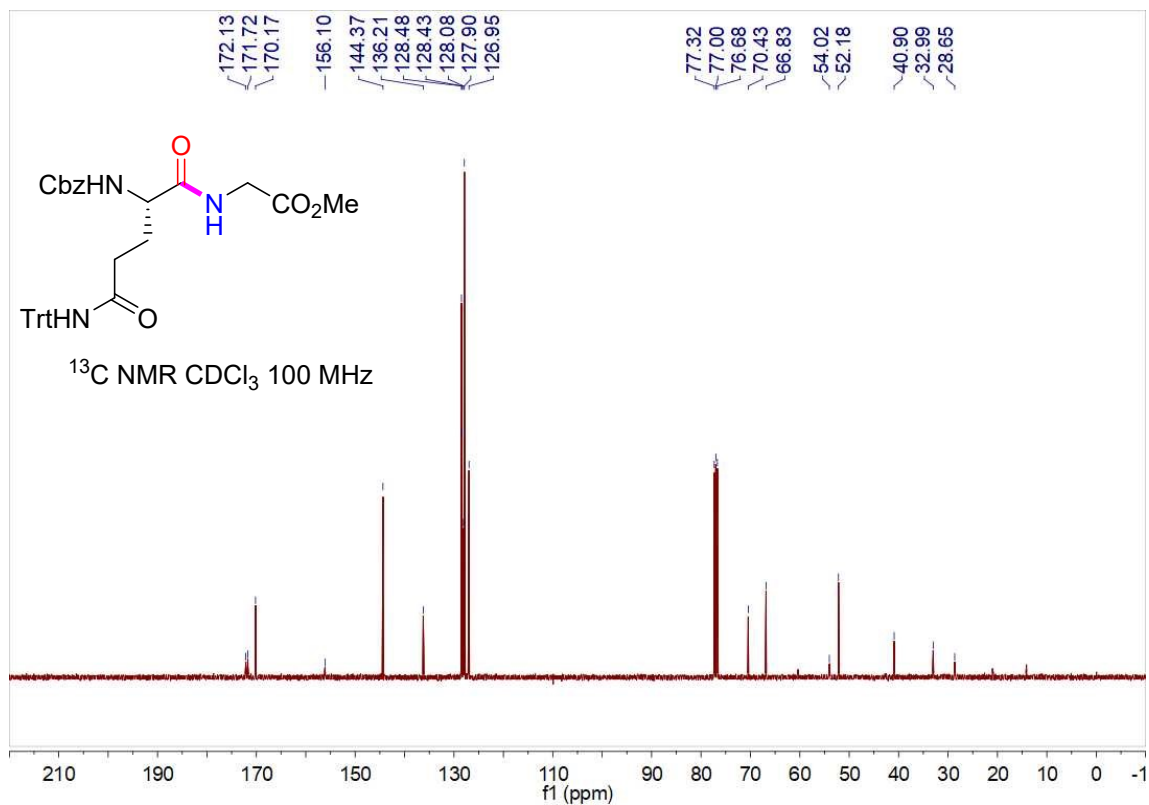

Chromatogram ( $\text{K}_2\text{S}_2\text{O}_8$ -NHC)

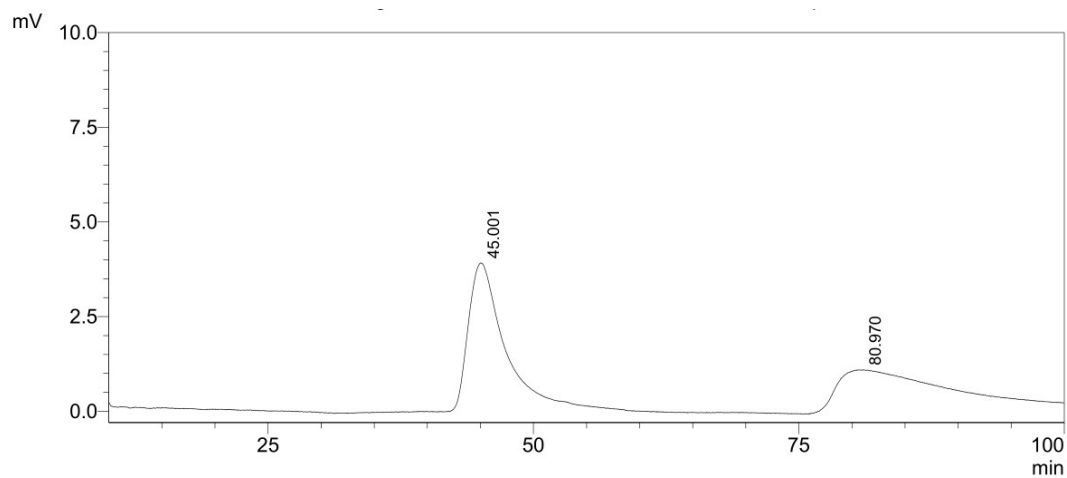

| Peak No | Ret. Time | Area    | Height | Area %  | Height% |
|---------|-----------|---------|--------|---------|---------|
| 1       | 45.001    | 620433  | 3385   | 50.998  | 76.670  |
| 2       | 80.970    | 596142  | 1030   | 49.002  | 23.330  |
| Total   |           | 1216575 | 4415   | 100.000 | 100.000 |

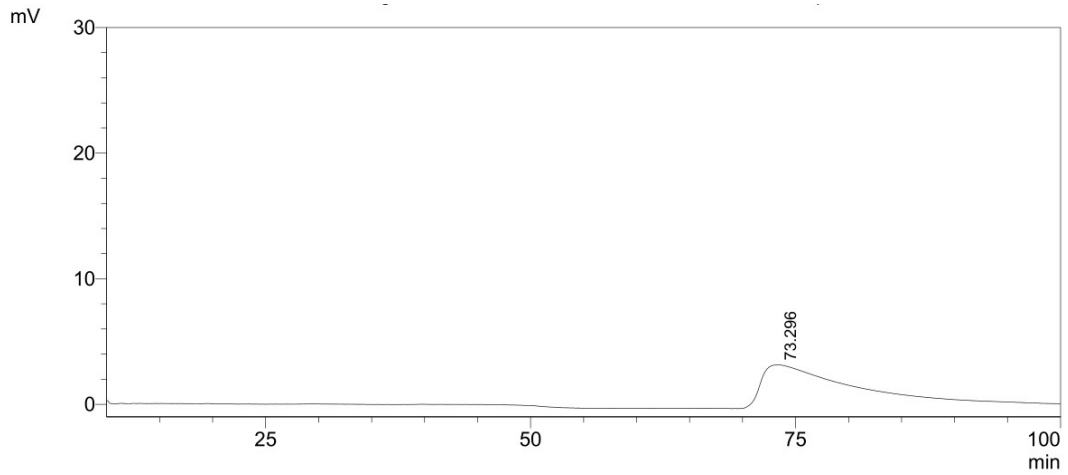

| Peak No | Ret. Time | Area    | Height | Area %  | Height% |
|---------|-----------|---------|--------|---------|---------|
| 1       | 73.269    | 1938122 | 3293   | 100.000 | 100.000 |
| Total   |           | 1938122 | 3293   | 100.000 | 100.000 |

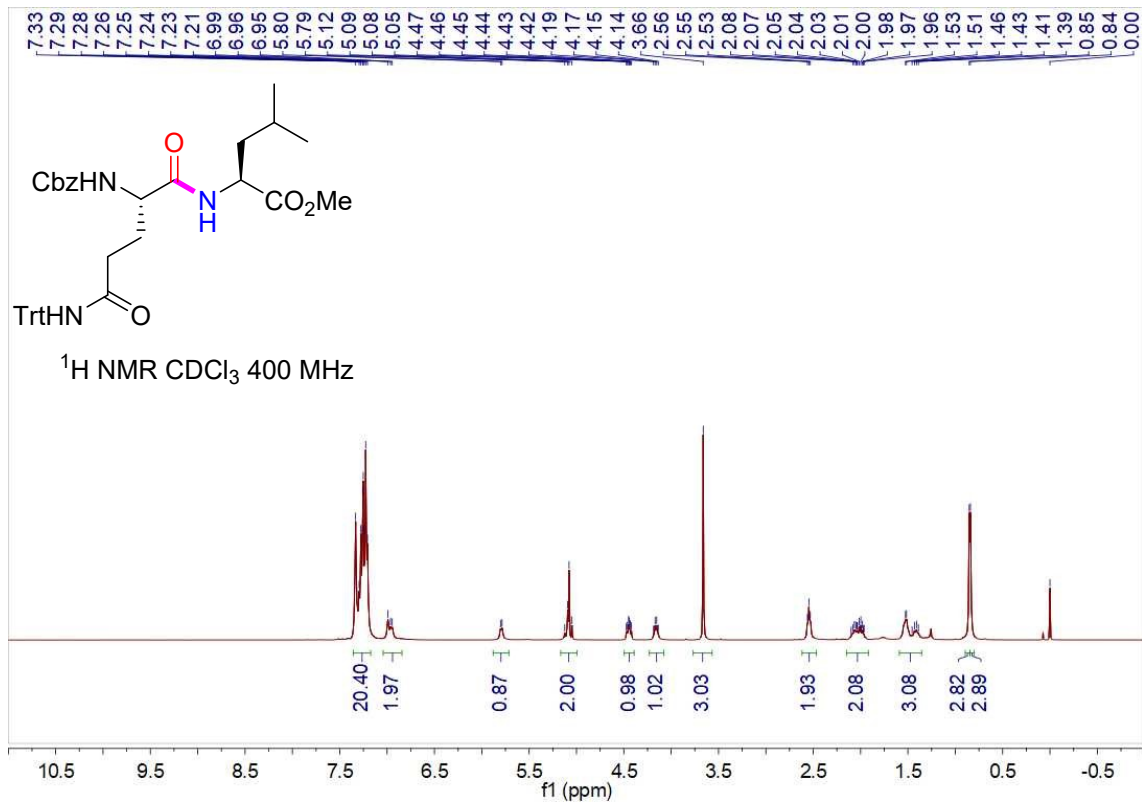

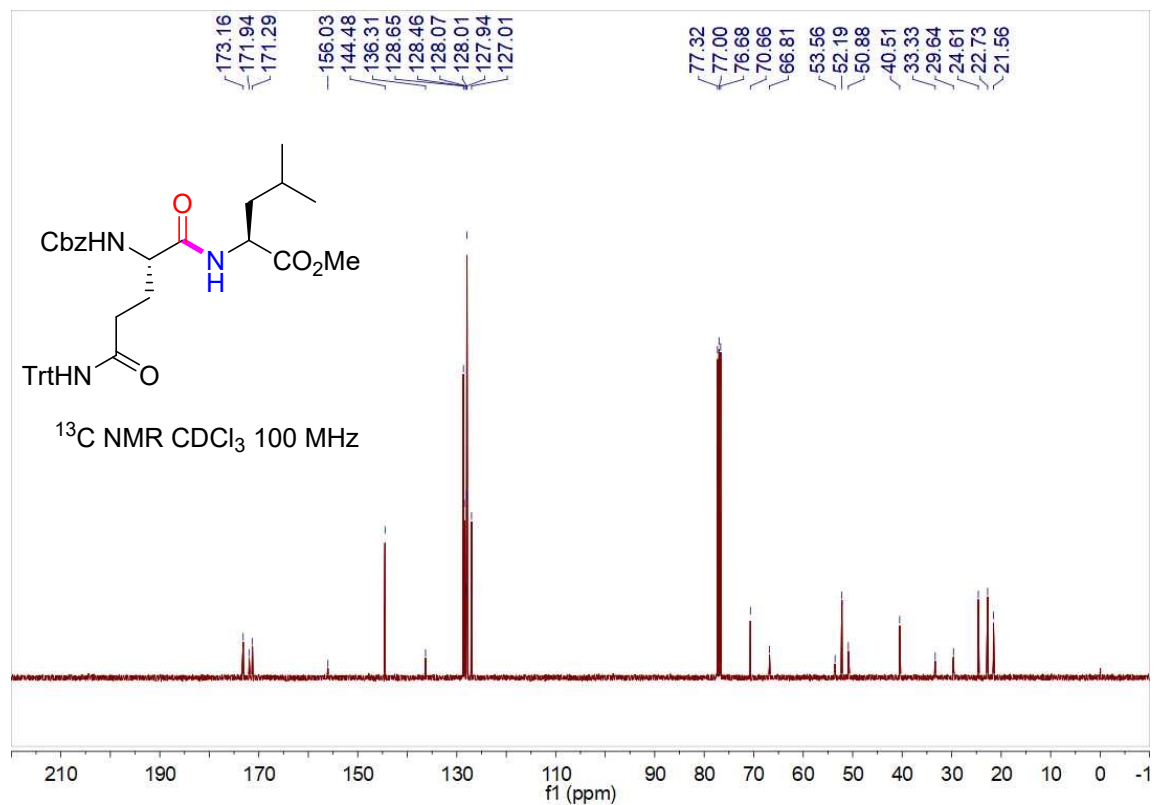

### Chromatogram

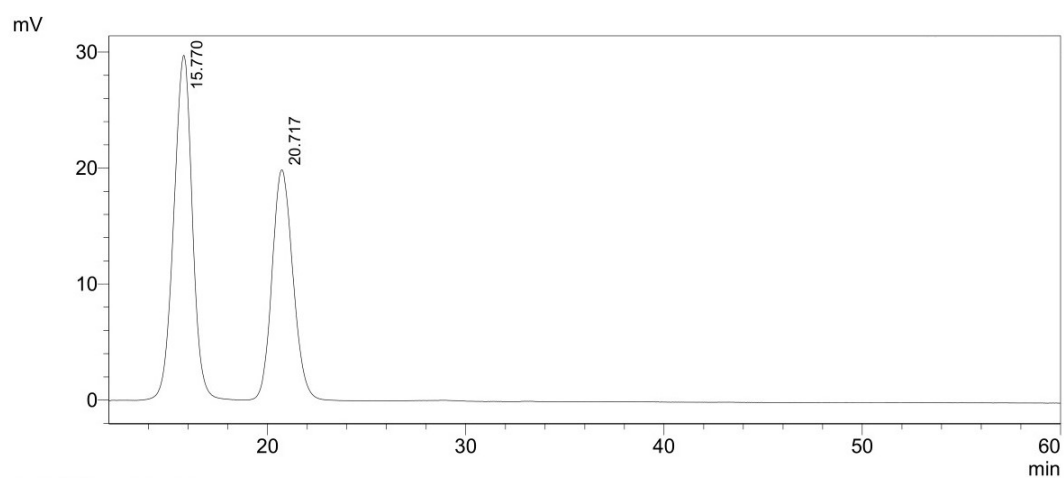

| Peak No | Ret. Time | Area    | Height | Area %  | Height% |
|---------|-----------|---------|--------|---------|---------|
| 1       | 15.770    | 1900131 | 29602  | 56.592  | 59.837  |
| 2       | 20.717    | 1457476 | 19869  | 43.408  | 40.163  |
| Total   |           | 3357607 | 49471  | 100.000 | 100.000 |

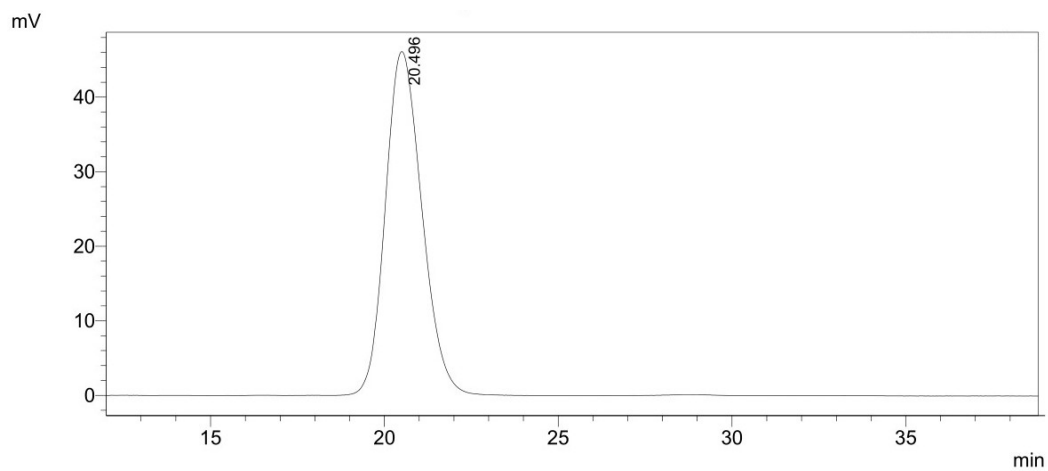

| Peak No | Ret. Time | Area    | Height | Area %  | Height% |
|---------|-----------|---------|--------|---------|---------|
| 1       | 20.496    | 3361806 | 46082  | 100.000 | 100.000 |
| Total   |           | 3361806 | 46082  | 100.000 | 100.000 |

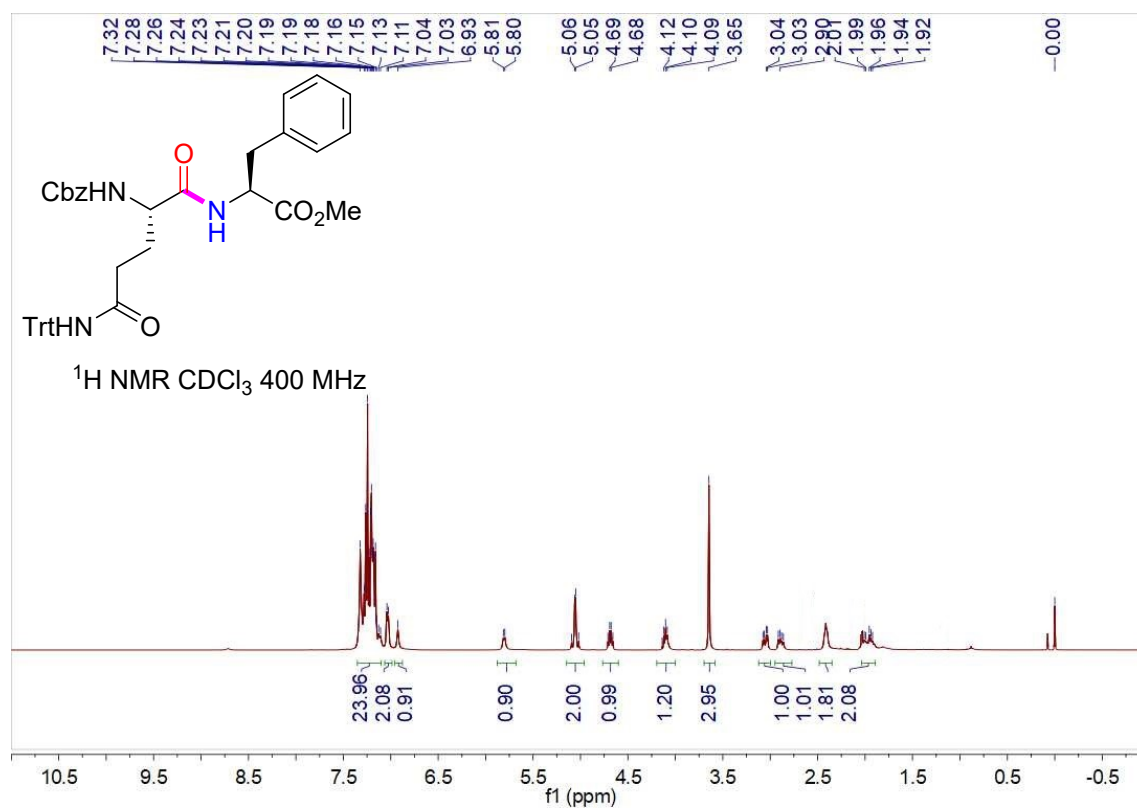

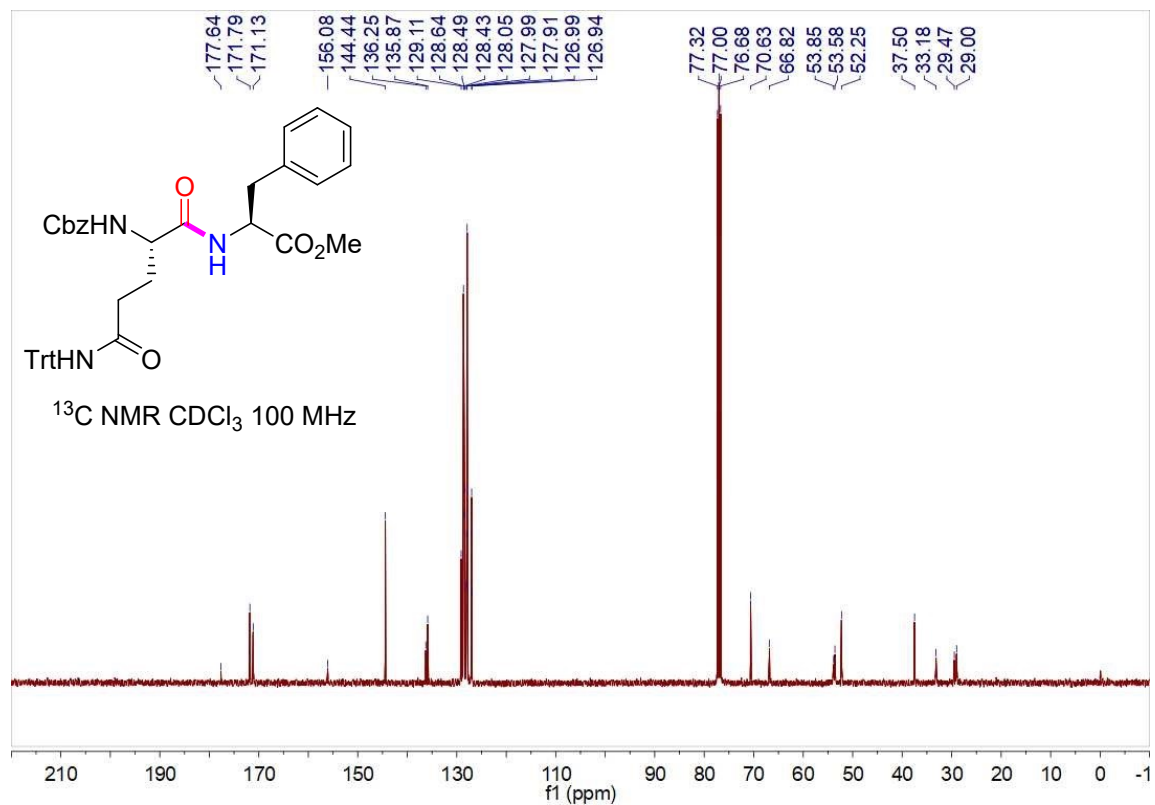

### Chromatogram

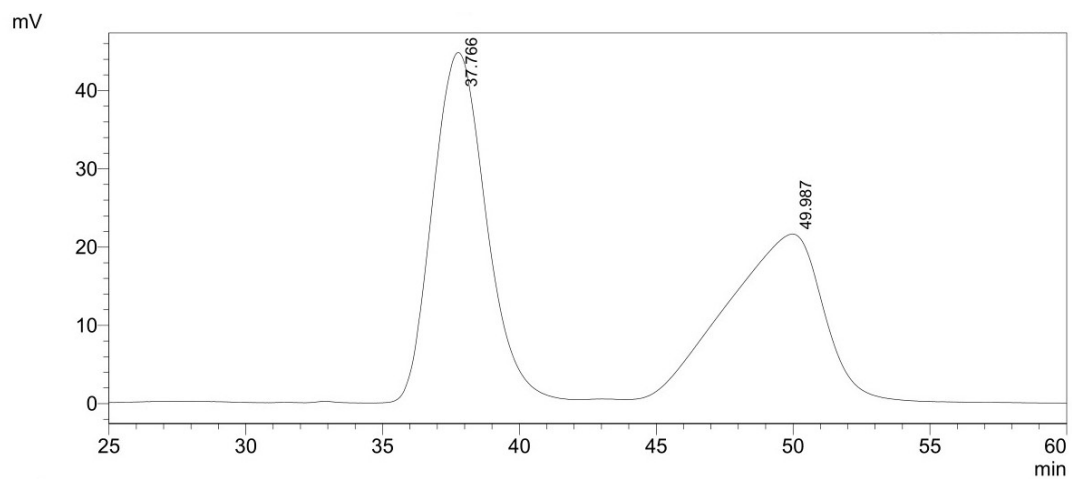

| Peak No | Ret. Time | Area     | Height | Area %  | Height% |
|---------|-----------|----------|--------|---------|---------|
| 1       | 37.766    | 5984616  | 44512  | 54.241  | 67.935  |
| 2       | 49.987    | 5048678  | 21009  | 45.759  | 32.065  |
| Total   |           | 11033294 | 65521  | 100.000 | 100.000 |

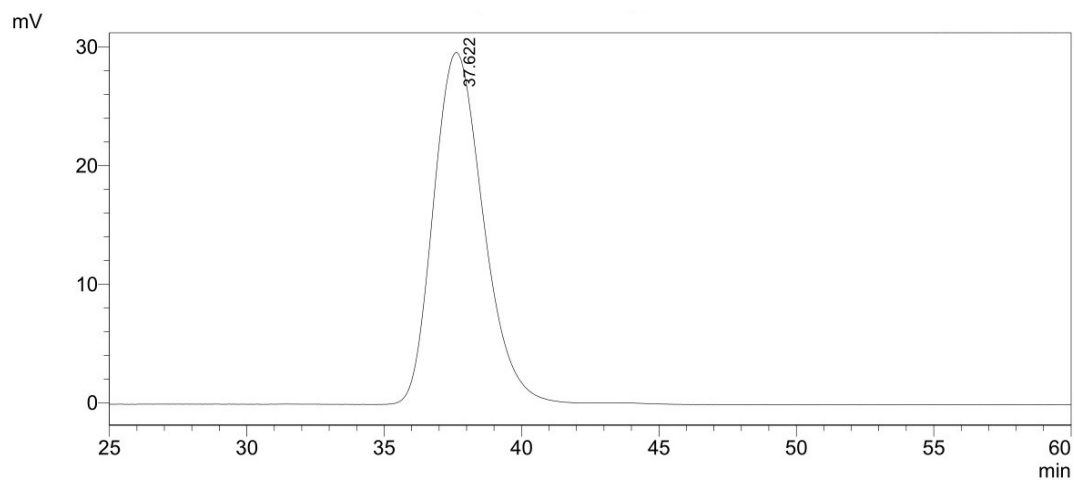

| Peak No | Ret. Time | Area    | Height | Area %  | Height% |
|---------|-----------|---------|--------|---------|---------|
| 1       | 37.622    | 3663500 | 29492  | 100.000 | 100.000 |
| Total   |           | 3663500 | 29492  | 100.000 | 100.000 |

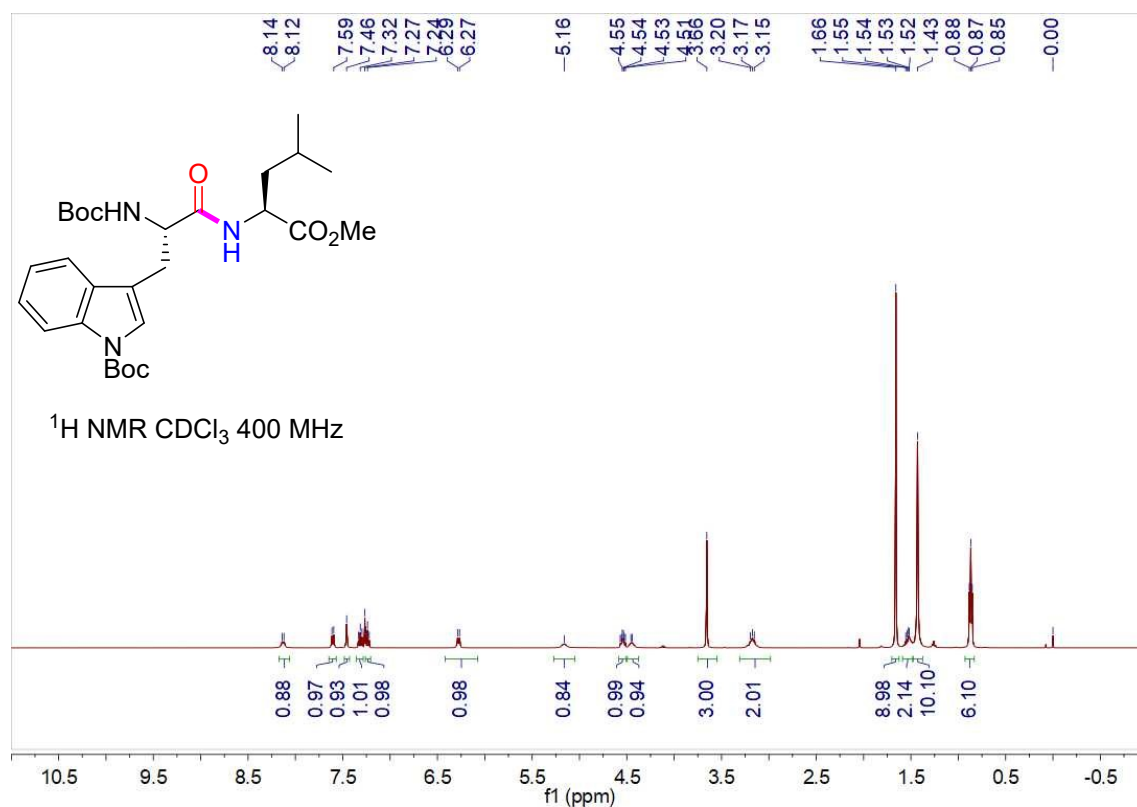



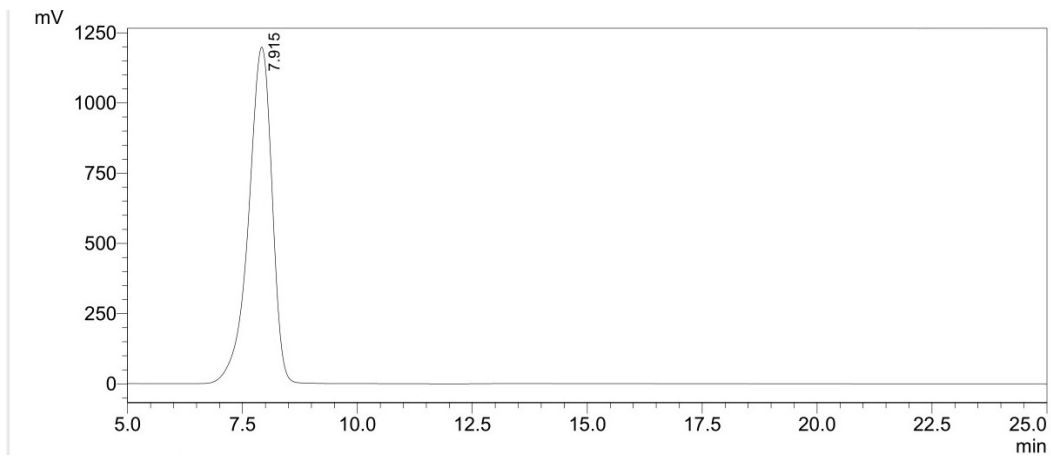

| Peak No | Ret. Time | Area     | Height  | Area %  | Height% |
|---------|-----------|----------|---------|---------|---------|
| 1       | 7.915     | 42549019 | 1198416 | 100.000 | 100.000 |
| Total   |           | 42549019 | 1198416 | 100.000 | 100.000 |

Chromatogram ( $K_2S_2O_8$ -NHC)

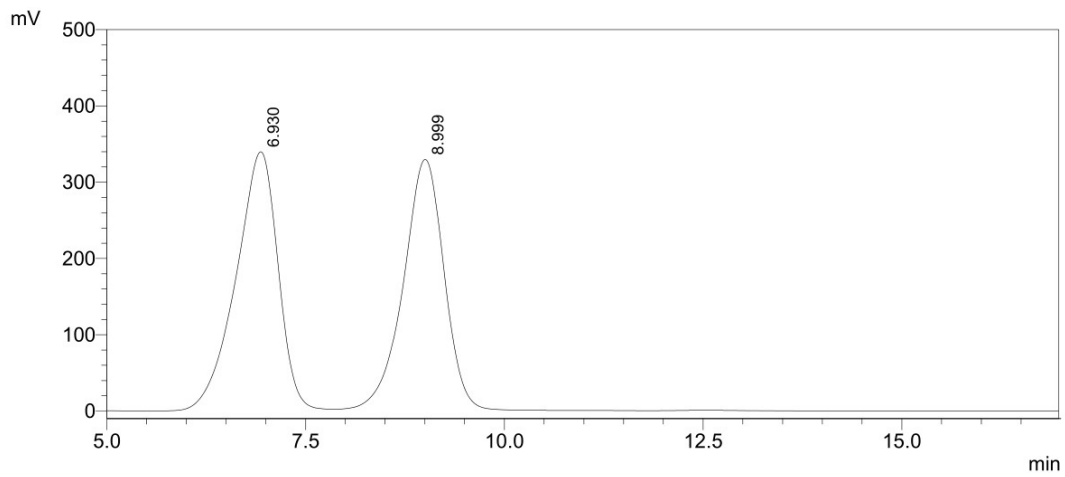

| Peak No | Ret. Time | Area     | Height | Area %  | Height% |
|---------|-----------|----------|--------|---------|---------|
| 1       | 6.930     | 12252630 | 337386 | 51.425  | 50.707  |
| 2       | 8.999     | 11573624 | 327973 | 48.575  | 49.293  |
| Total   |           | 23826253 | 665358 | 100.000 | 100.000 |



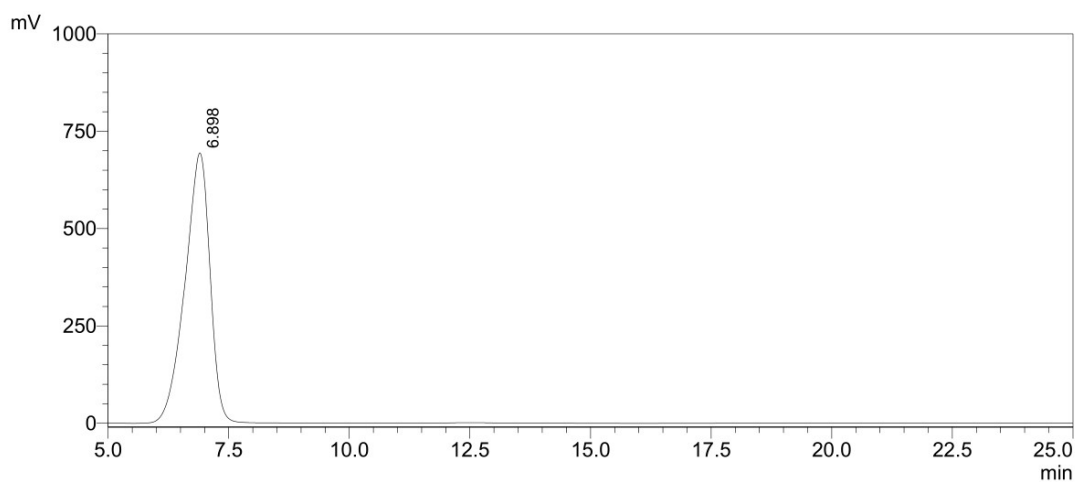

| Peak No | Ret. Time | Area     | Height | Area %  | Height% |
|---------|-----------|----------|--------|---------|---------|
| 1       | 6.898     | 25078449 | 694260 | 100.000 | 100.000 |
| Total   |           | 25078449 | 694260 | 100.000 | 100.000 |

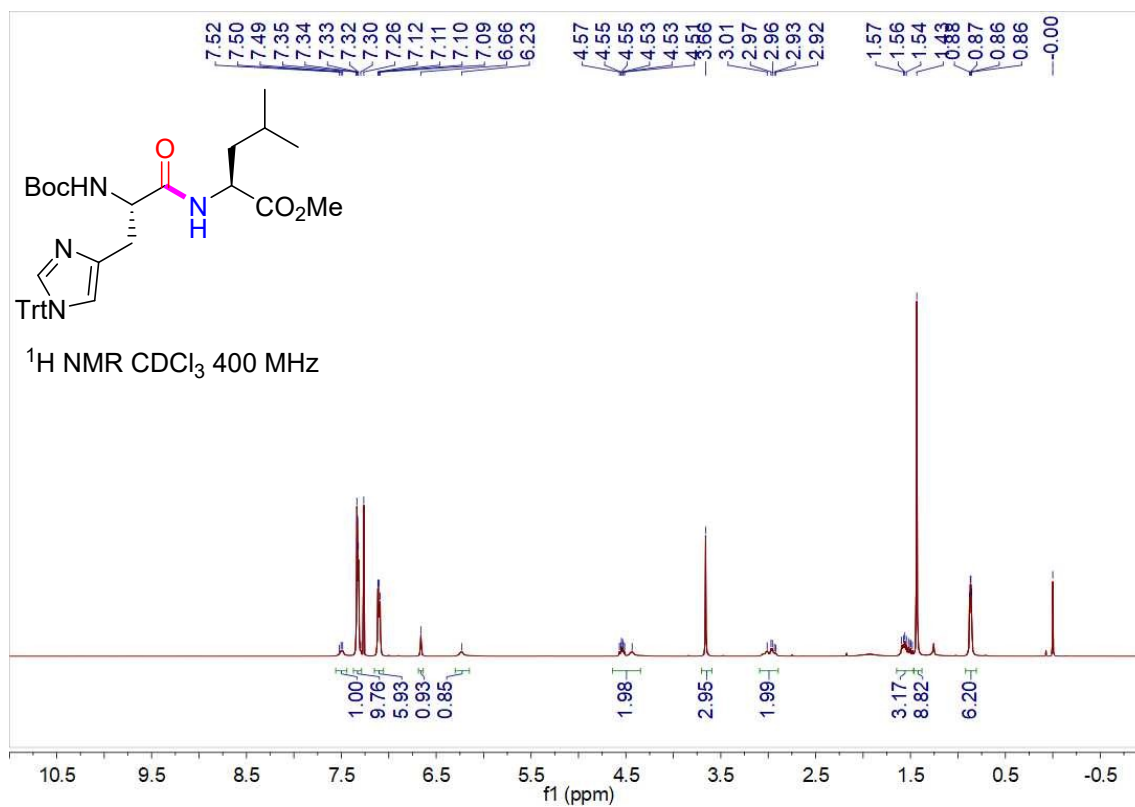

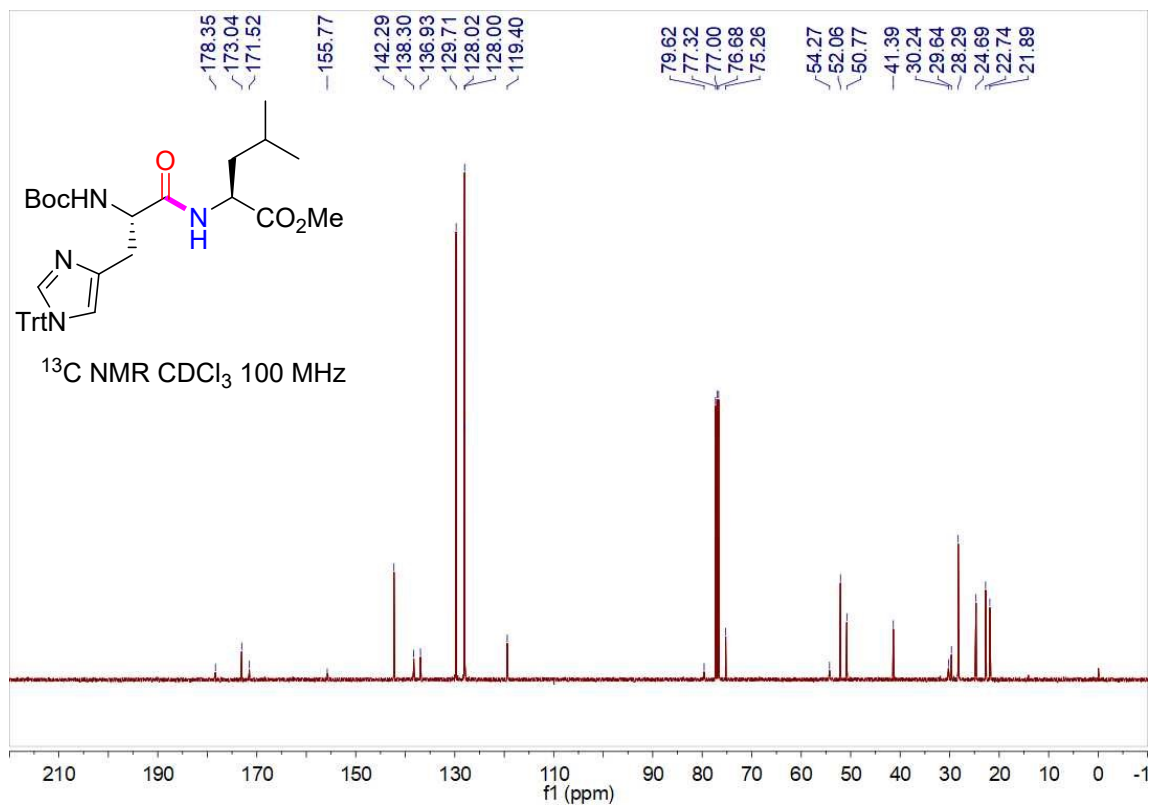

### Chromatogram

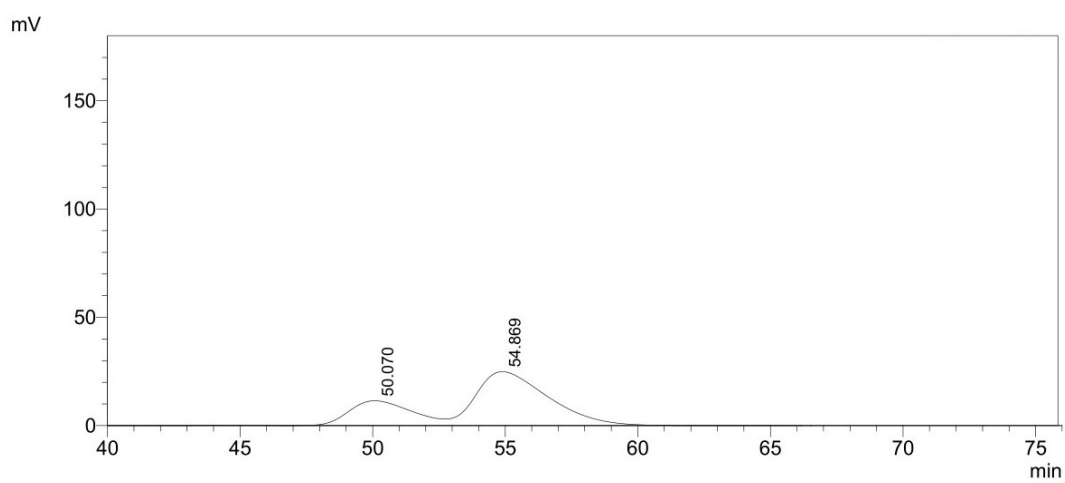

| Peak No | Ret. Time | Area    | Height | Area %  | Height% |
|---------|-----------|---------|--------|---------|---------|
| 1       | 50.070    | 1416592 | 9968   | 26.342  | 30.616  |
| 2       | 54.869    | 3961160 | 22591  | 73.658  | 69.384  |
| Total   |           | 5377752 | 32559  | 100.000 | 100.000 |

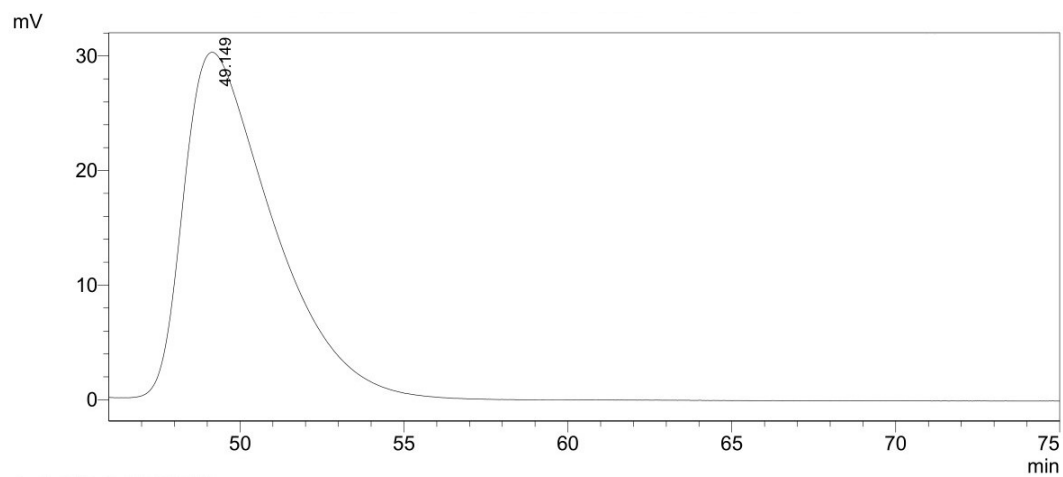

| Peak No | Ret. Time | Area    | Height | Area %  | Height% |
|---------|-----------|---------|--------|---------|---------|
| 1       | 49.149    | 5661971 | 30105  | 100.000 | 100.000 |
| Total   |           | 5661971 | 30105  | 100.000 | 100.000 |

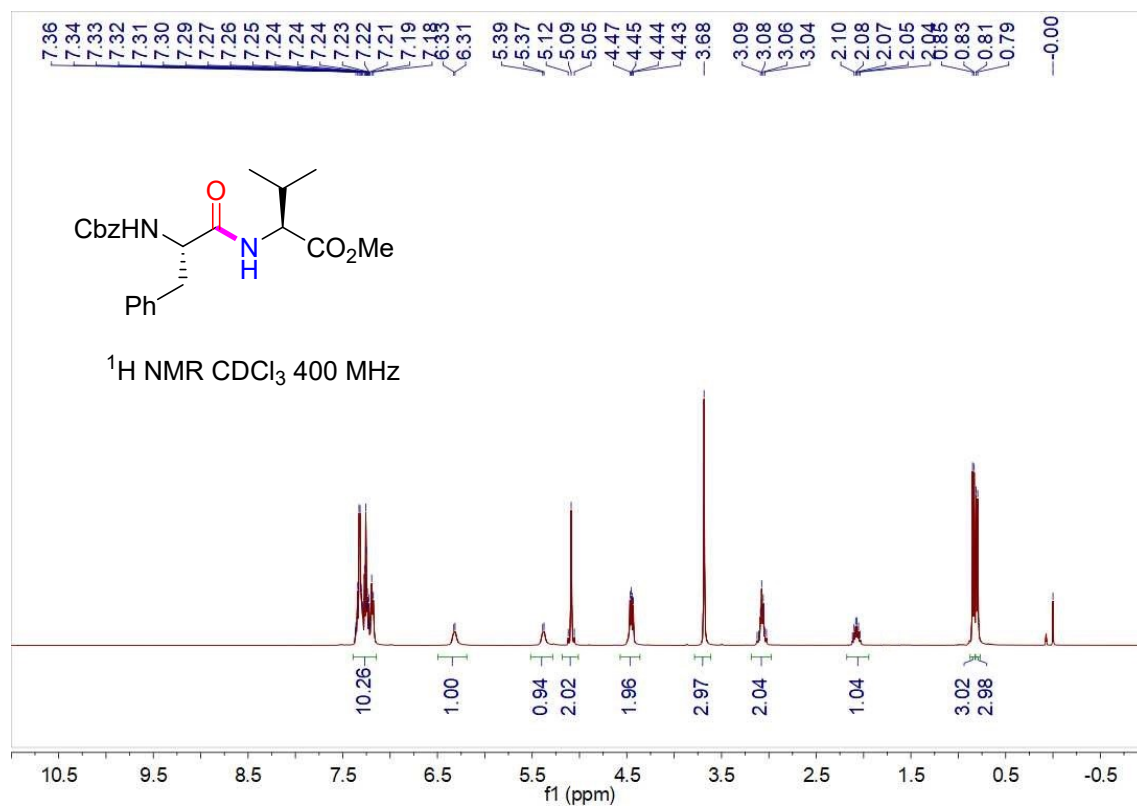

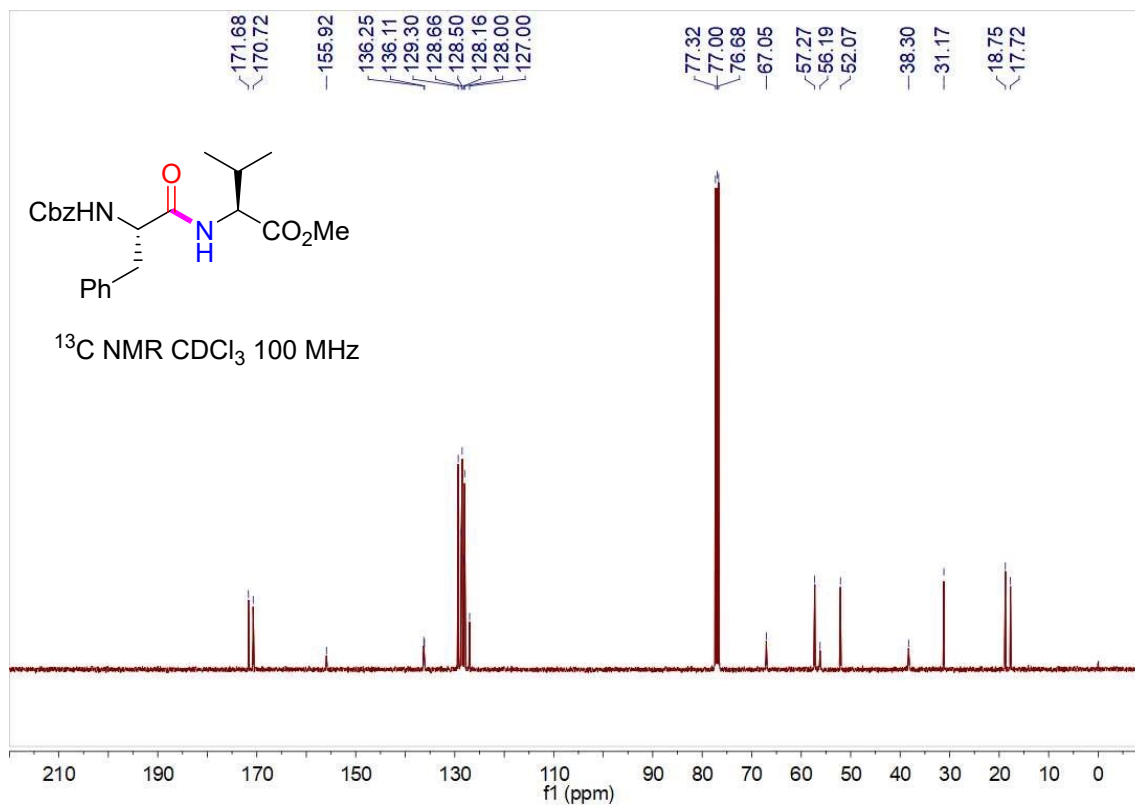

Chromatogram (NIS-NHC)

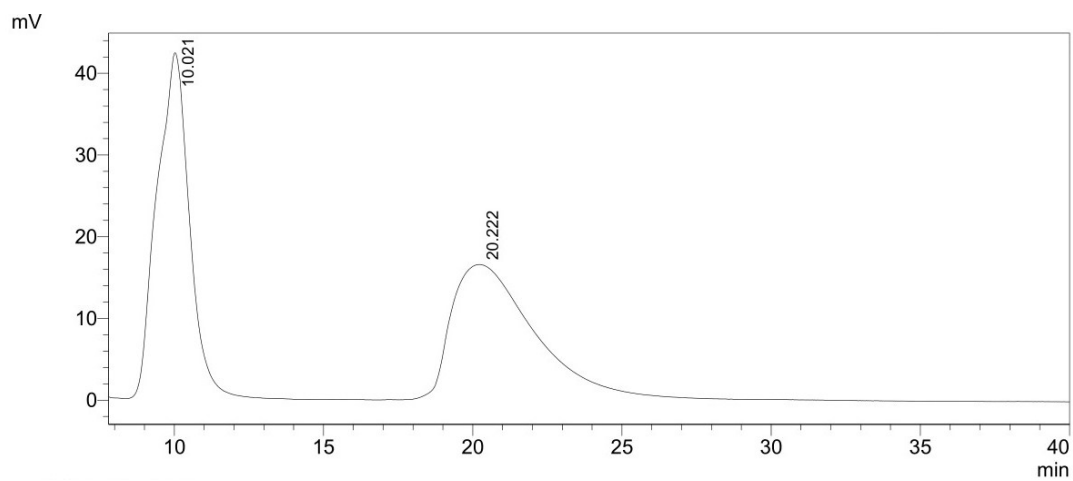

| Peak No | Ret. Time | Area    | Height | Area %  | Height% |
|---------|-----------|---------|--------|---------|---------|
| 1       | 10.021    | 3179848 | 42268  | 51.895  | 72.330  |
| 2       | 20.222    | 2947589 | 16170  | 48.105  | 27.670  |
| Total   |           | 6127437 | 58438  | 100.000 | 100.000 |

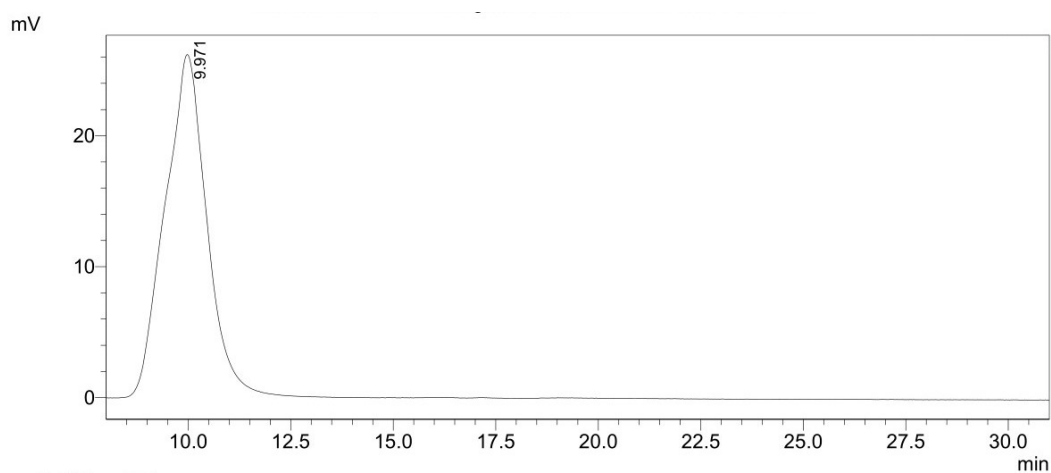

| Peak No | Ret. Time | Area    | Height | Area %  | Height% |
|---------|-----------|---------|--------|---------|---------|
| 1       | 9.971     | 1832829 | 26123  | 100.000 | 100.000 |
| Total   |           | 1832829 | 26123  | 100.000 | 100.000 |

Chromatogram ( $K_2S_2O_8$ -NHC)

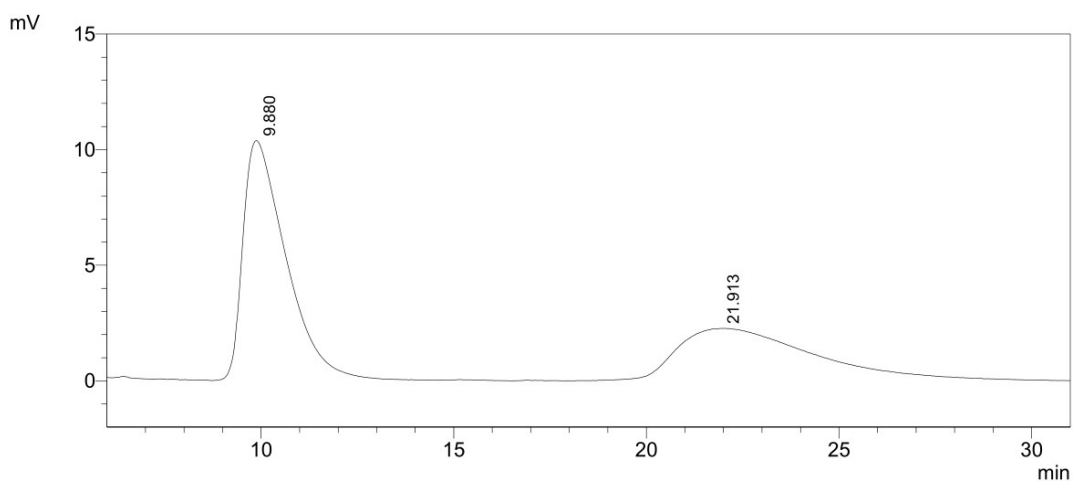

| Peak No | Ret. Time | Area    | Height | Area %  | Height% |
|---------|-----------|---------|--------|---------|---------|
| 1       | 9.880     | 563807  | 8941   | 50.610  | 79.870  |
| 2       | 21.913    | 550205  | 2253   | 49.390  | 23.130  |
| Total   |           | 1114012 | 11194  | 100.000 | 100.000 |

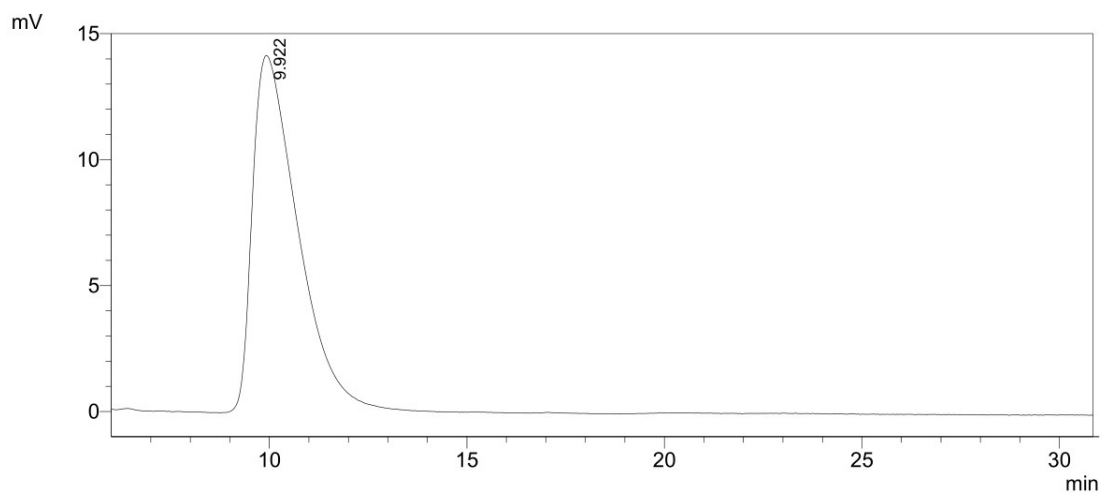

| Peak No | Ret. Time | Area    | Height | Area %  | Height% |
|---------|-----------|---------|--------|---------|---------|
| 1       | 9.922     | 1121435 | 14143  | 100.000 | 100.000 |
| Total   |           | 1121435 | 14143  | 100.000 | 100.000 |

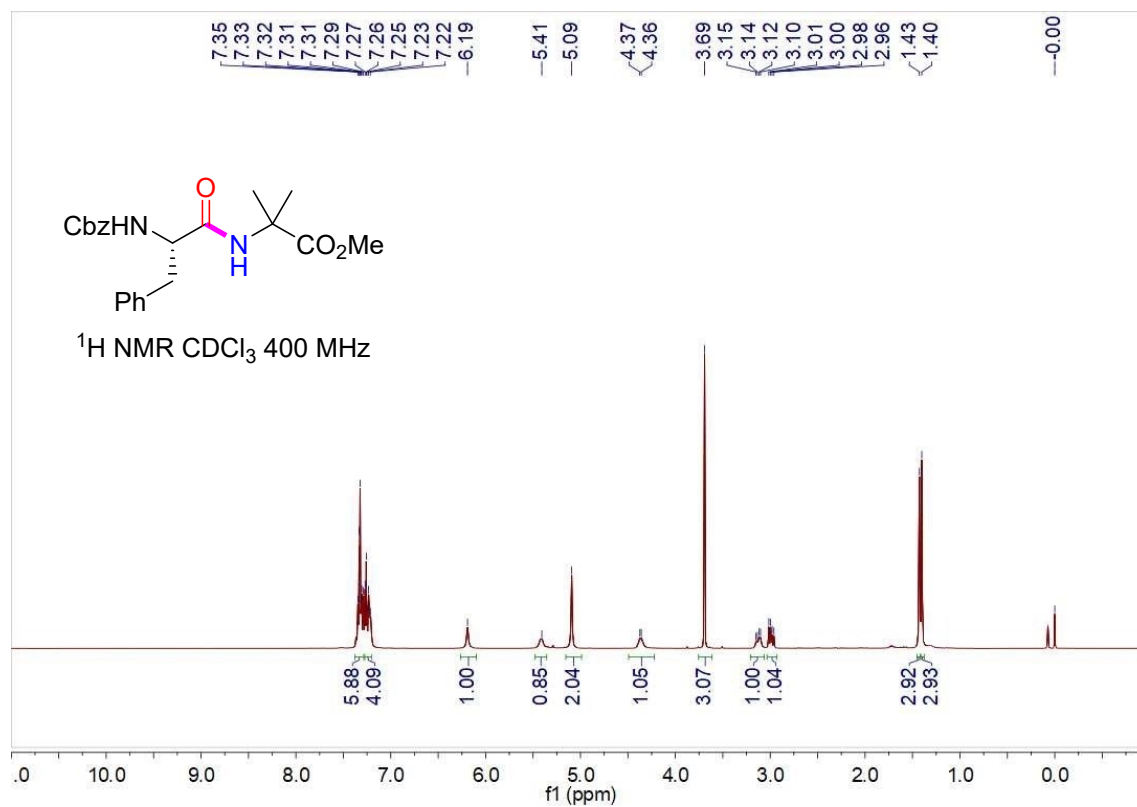

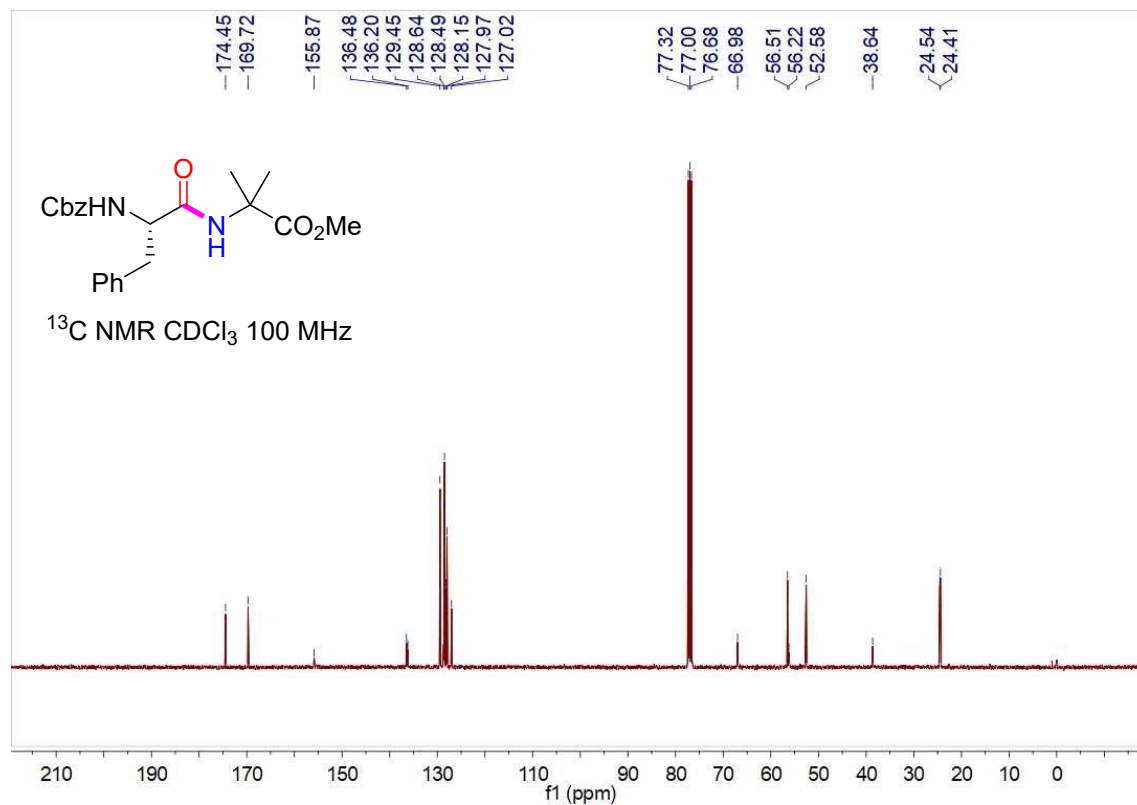

Chromatogram

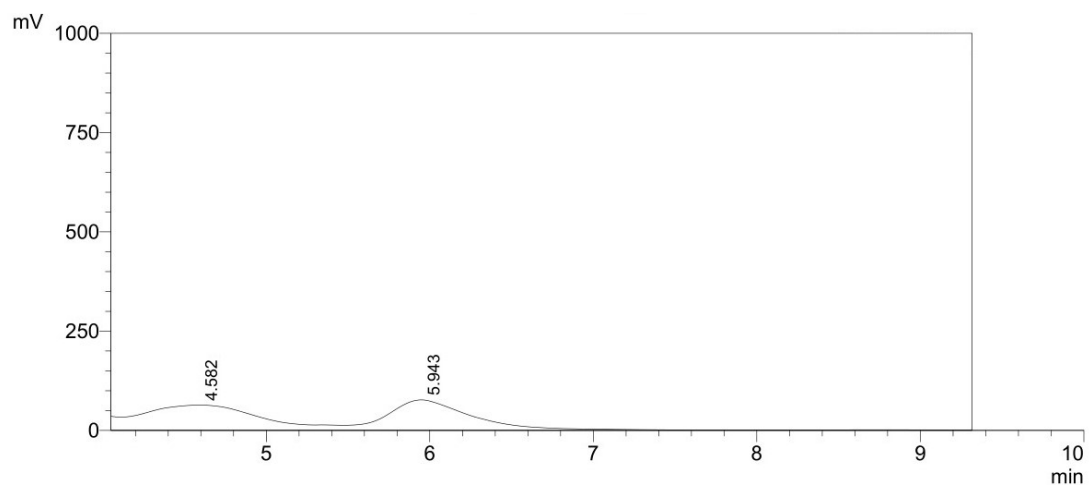

| Peak No | Ret. Time | Area    | Height | Area %  | Height% |
|---------|-----------|---------|--------|---------|---------|
| 1       | 4.582     | 1346249 | 37291  | 40.982  | 36.130  |
| 2       | 5.943     | 1938713 | 65921  | 59.018  | 63.870  |
| Total   |           | 3284962 | 103212 | 100.000 | 100.000 |

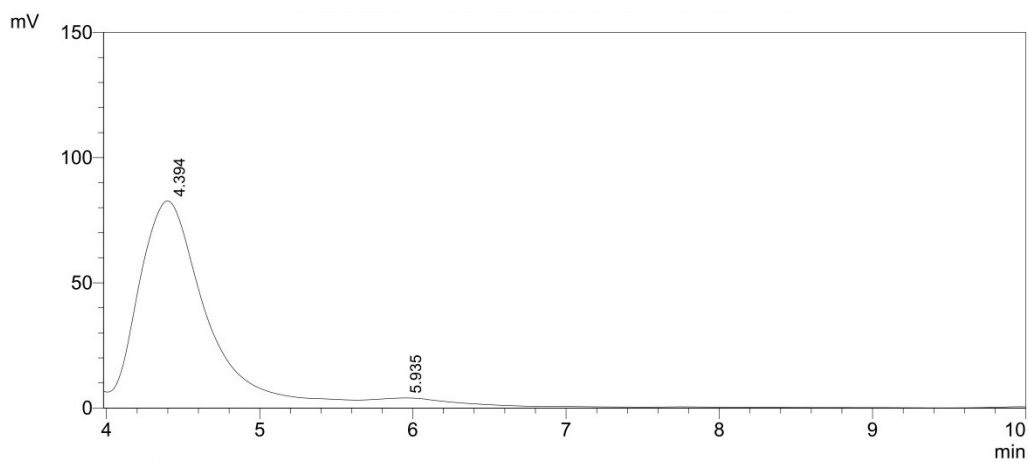

| Peak No | Ret. Time | Area    | Height | Area %  | Height% |
|---------|-----------|---------|--------|---------|---------|
| 1       | 4.394     | 2066674 | 76662  | 98.064  | 97.973  |
| 2       | 5.935     | 40799   | 1586   | 1.936   | 2.027   |
| Total   |           | 2107473 | 78248  | 100.000 | 100.000 |

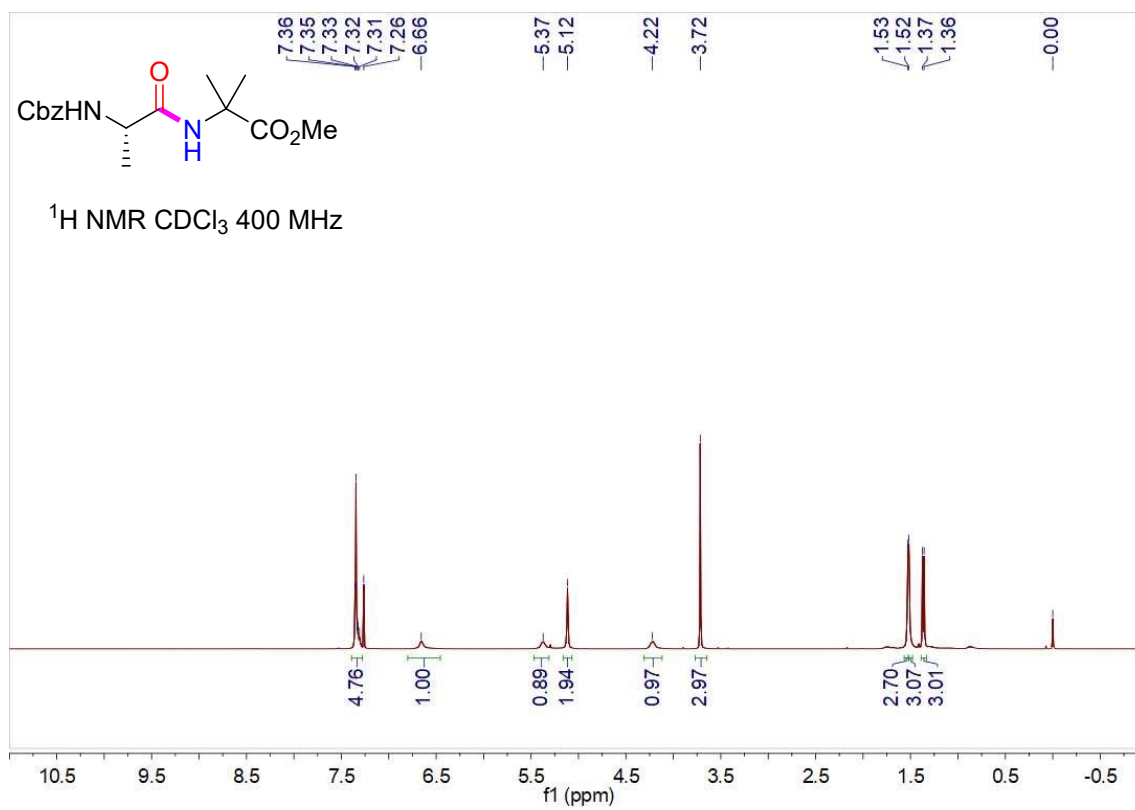



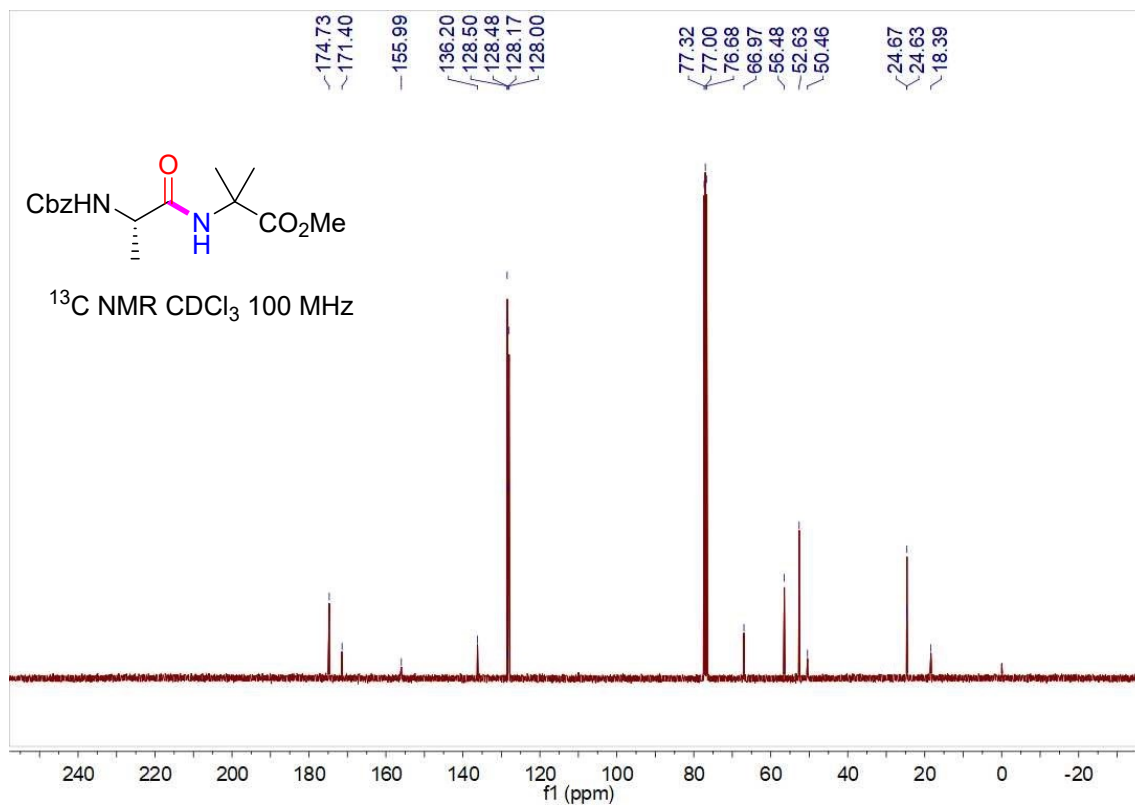

### Chromatogram

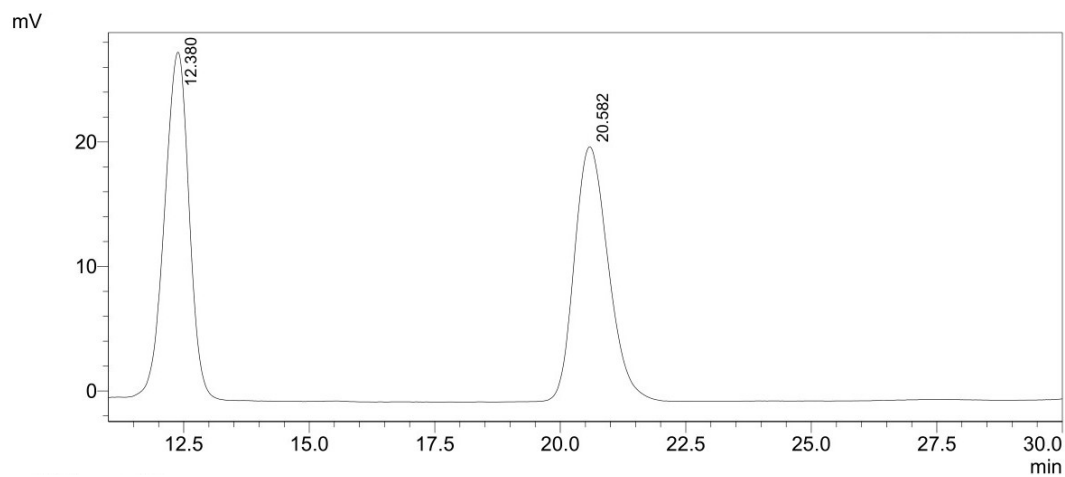

| Peak No | Ret. Time | Area    | Height | Area %  | Height% |
|---------|-----------|---------|--------|---------|---------|
| 1       | 12.380    | 944128  | 27838  | 49.560  | 57.655  |
| 2       | 20.582    | 960885  | 20455  | 50.440  | 42.356  |
| Total   |           | 1905013 | 48293  | 100.000 | 100.000 |

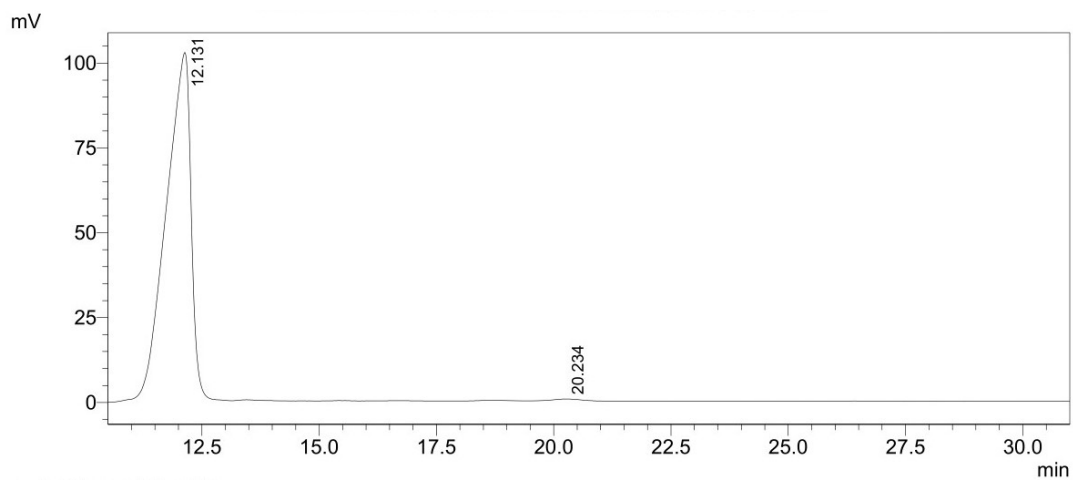

| Peak No | Ret. Time | Area    | Height | Area %  | Height% |
|---------|-----------|---------|--------|---------|---------|
| 1       | 12.131    | 3788635 | 102742 | 99.363  | 99.433  |
| 2       | 20.234    | 24304   | 586    | 0.637   | 0.567   |
| Total   |           | 3812939 | 103328 | 100.000 | 100.000 |

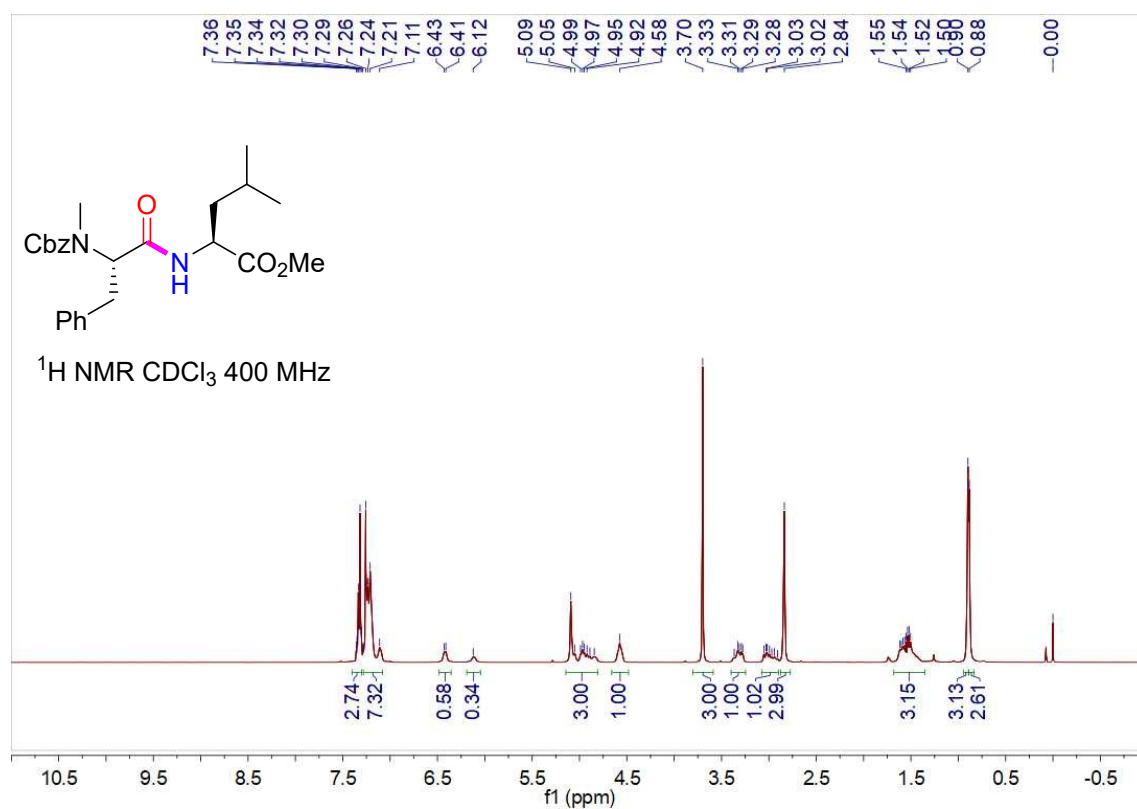

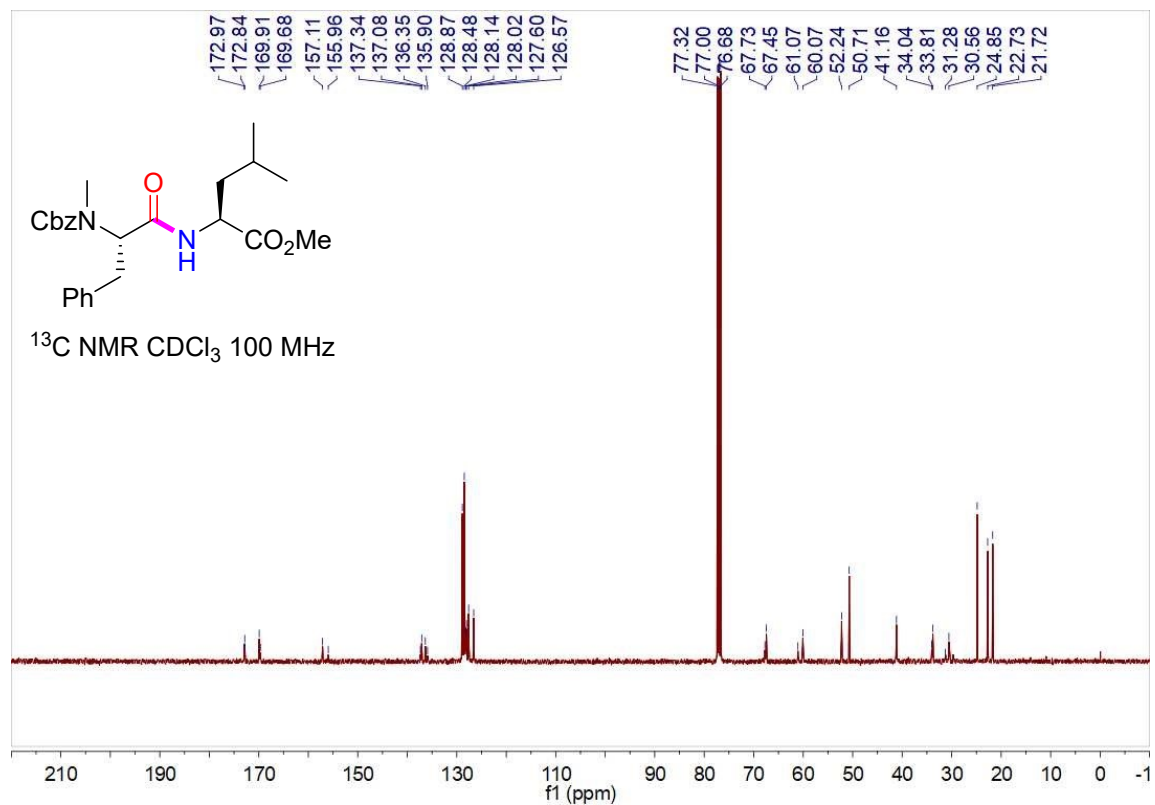

Chromatogram (NIS-NHC)

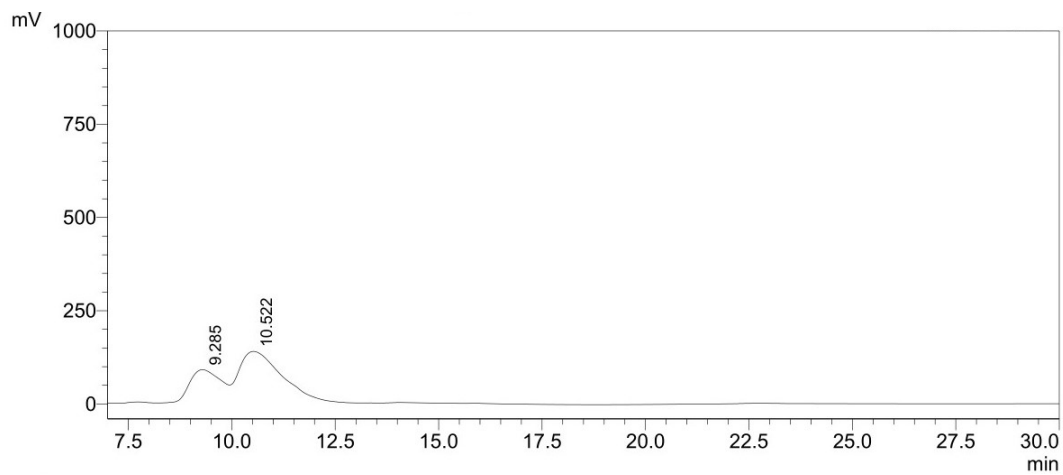

| Peak No | Ret. Time | Area    | Height | Area %  | Height% |
|---------|-----------|---------|--------|---------|---------|
| 1       | 9.285     | 2447599 | 61188  | 48.784  | 53.906  |
| 2       | 10.522    | 2569612 | 52320  | 51.216  | 46.094  |
| Total   |           | 5017211 | 113508 | 100.000 | 100.000 |

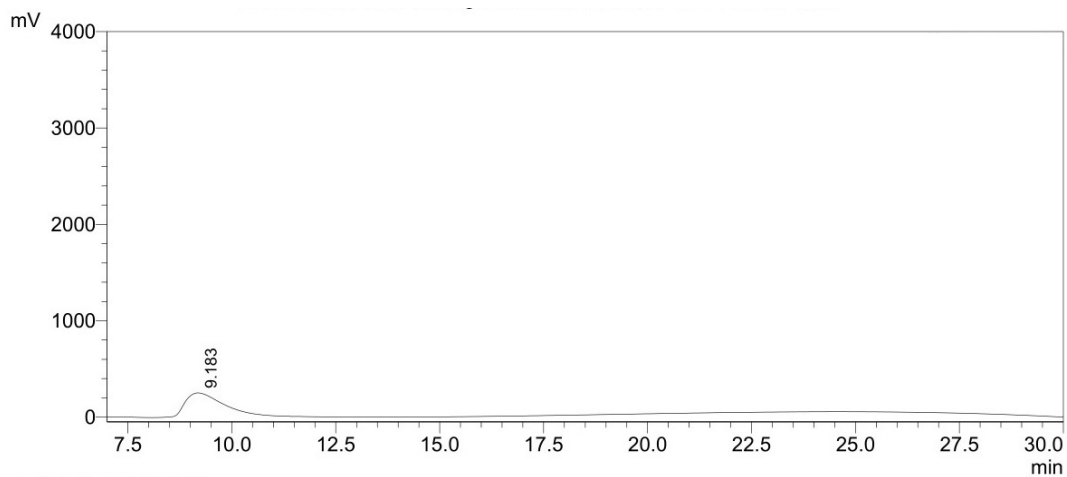

| Peak No | Ret. Time | Area     | Height | Area %  | Height% |
|---------|-----------|----------|--------|---------|---------|
| 1       | 9.183     | 13164082 | 221017 | 100.000 | 100.000 |
| Total   |           | 13164082 | 221017 | 100.000 | 100.000 |

Chromatogram (K<sub>2</sub>S<sub>2</sub>O<sub>8</sub>-NHC)

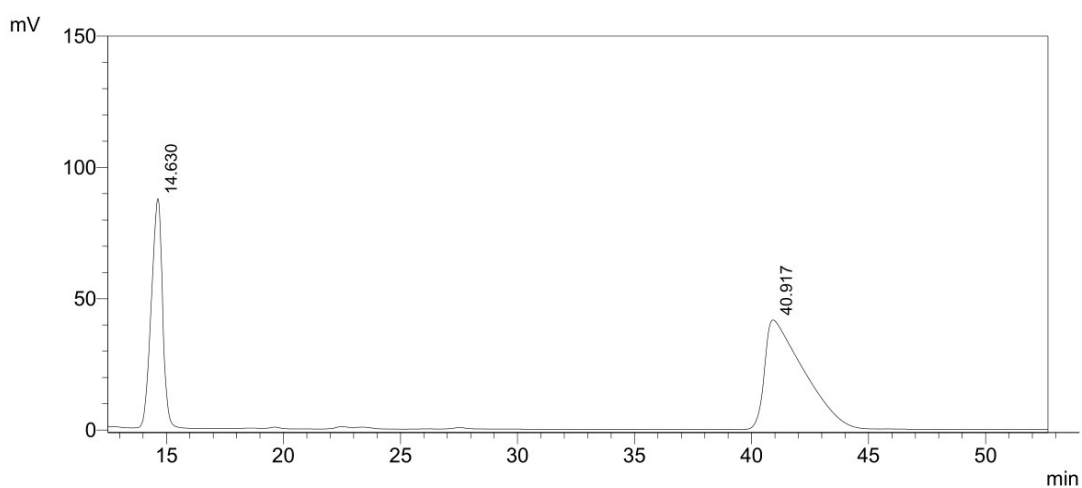

| Peak No | Ret. Time | Area    | Height | Area %  | Height% |
|---------|-----------|---------|--------|---------|---------|
| 1       | 14.630    | 2897478 | 87422  | 50.461  | 73.941  |
| 2       | 40.917    | 2844538 | 30809  | 49.539  | 26.059  |
| Total   |           | 5742017 | 118231 | 100.000 | 100.000 |

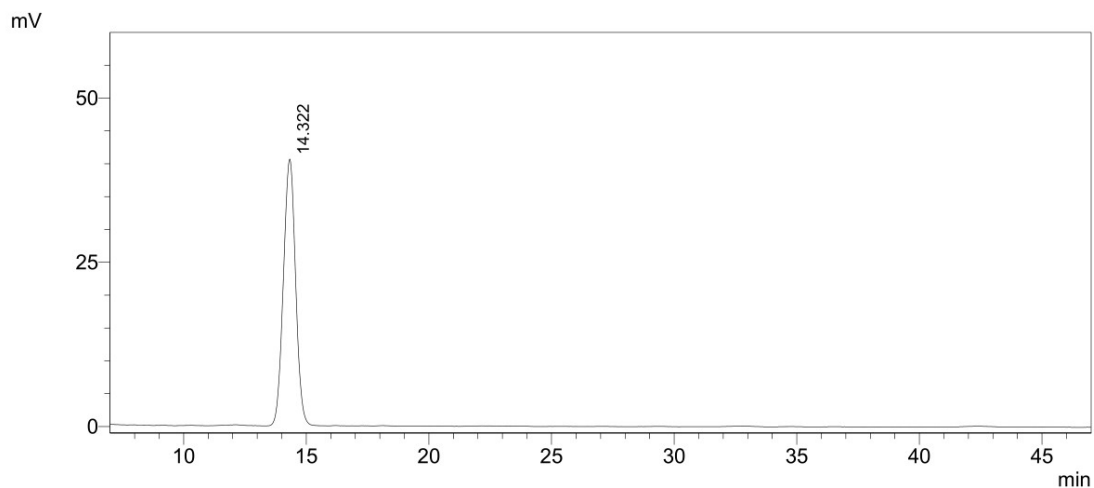

| Peak No | Ret. Time | Area    | Height | Area %  | Height% |
|---------|-----------|---------|--------|---------|---------|
| 1       | 14.322    | 1402754 | 40593  | 100.000 | 100.000 |
| Total   |           | 1402754 | 40593  | 100.000 | 100.000 |

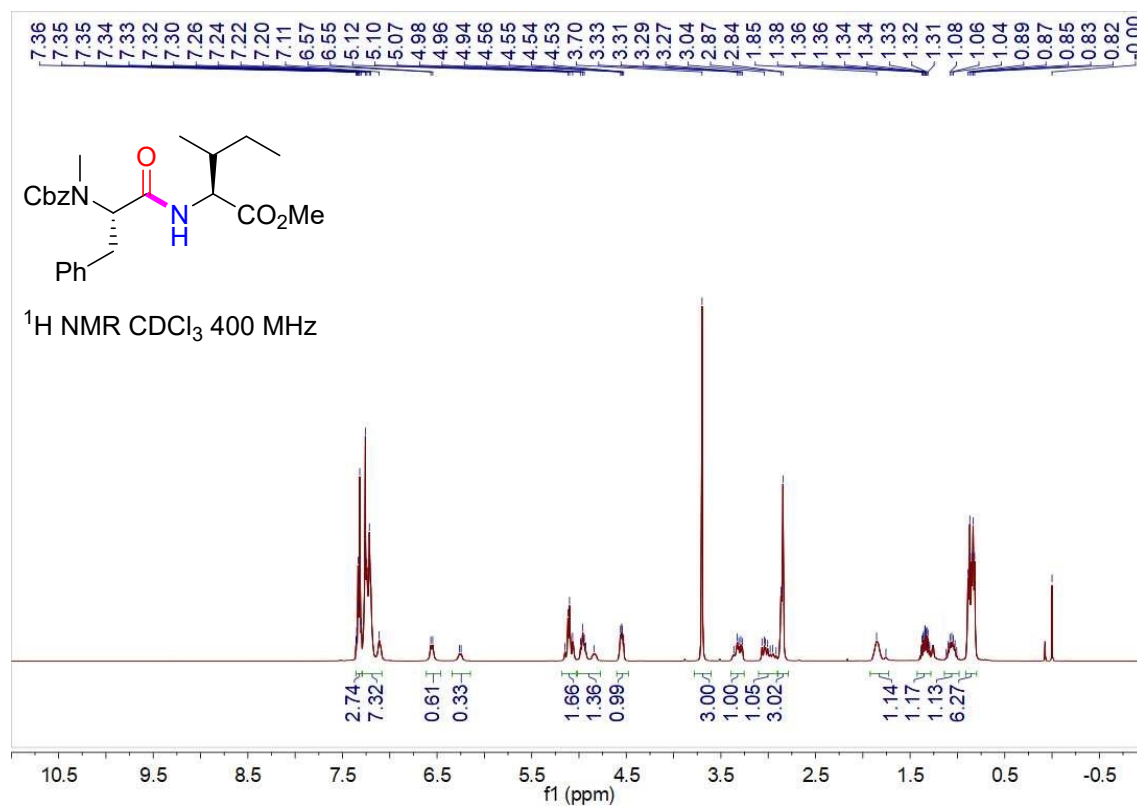

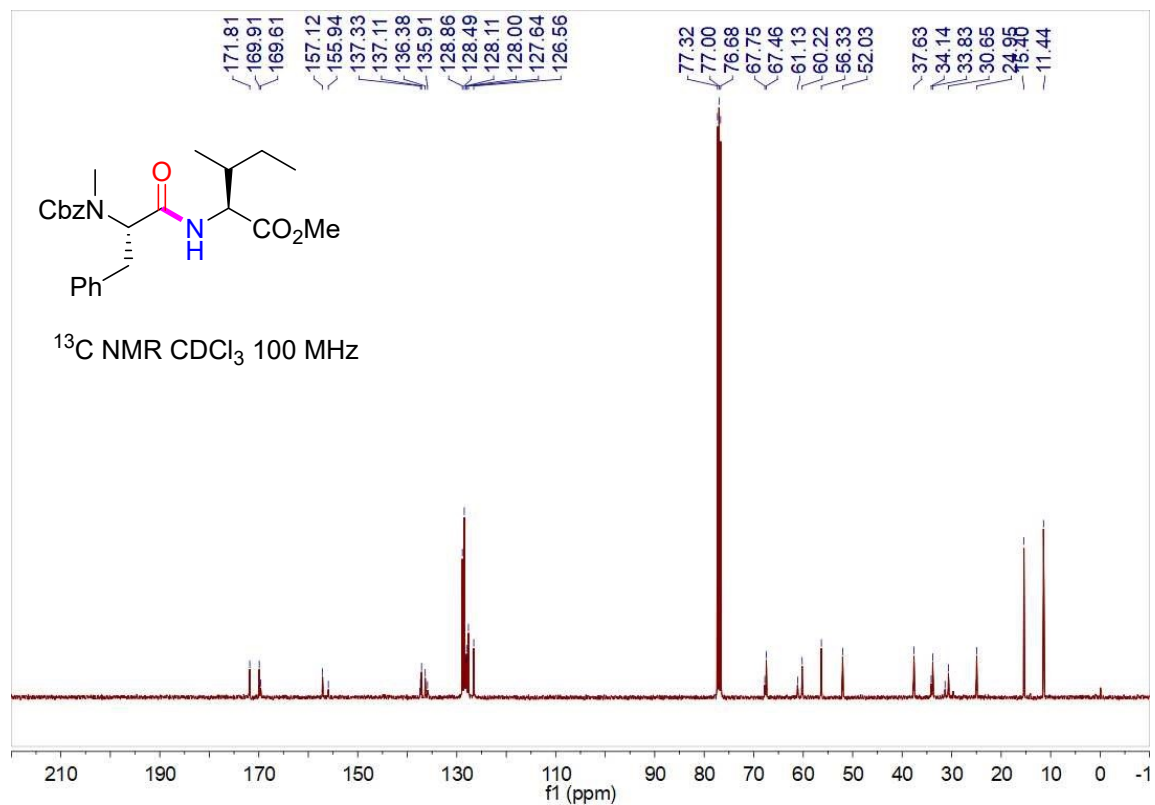

Chromatogram

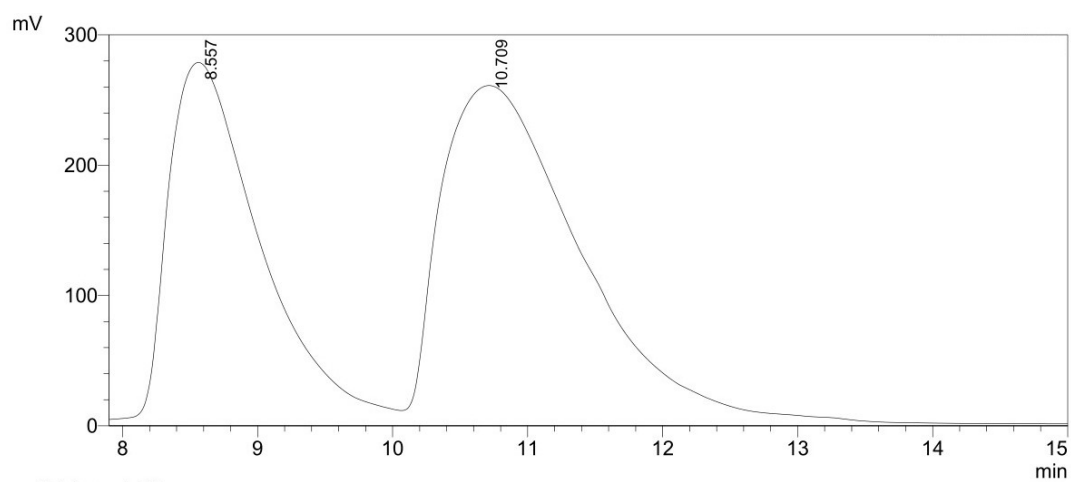

| Peak No | Ret. Time | Area     | Height | Area %  | Height% |
|---------|-----------|----------|--------|---------|---------|
| 1       | 8.557     | 12316971 | 271826 | 48.535  | 56.135  |
| 2       | 10.709    | 13060579 | 212409 | 51.465  | 43.865  |
| Total   |           | 25377551 | 484235 | 100.000 | 100.000 |

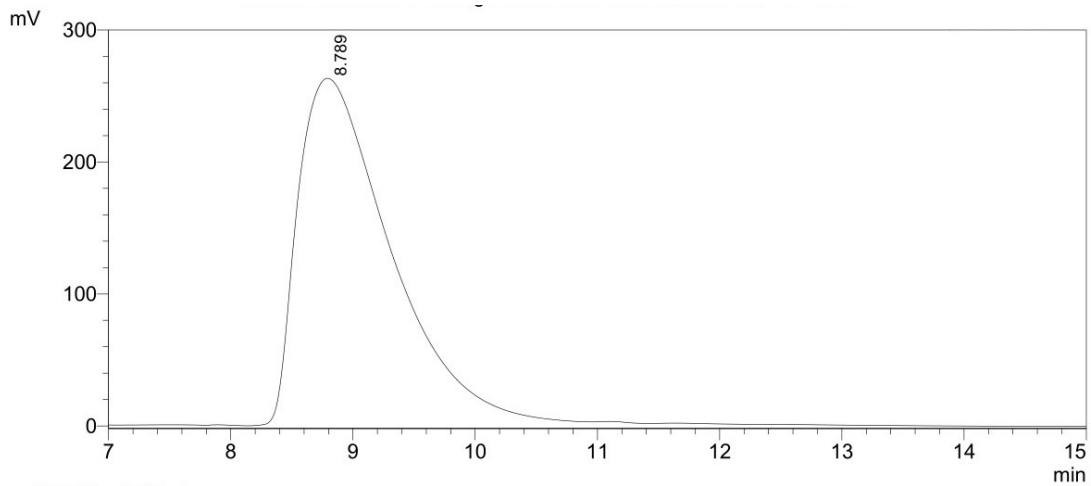

| Peak No | Ret. Time | Area     | Height | Area %  | Height% |
|---------|-----------|----------|--------|---------|---------|
| 1       | 8.789     | 13746775 | 262348 | 100.000 | 100.000 |
| Total   |           | 13746775 | 262348 | 100.000 | 100.000 |

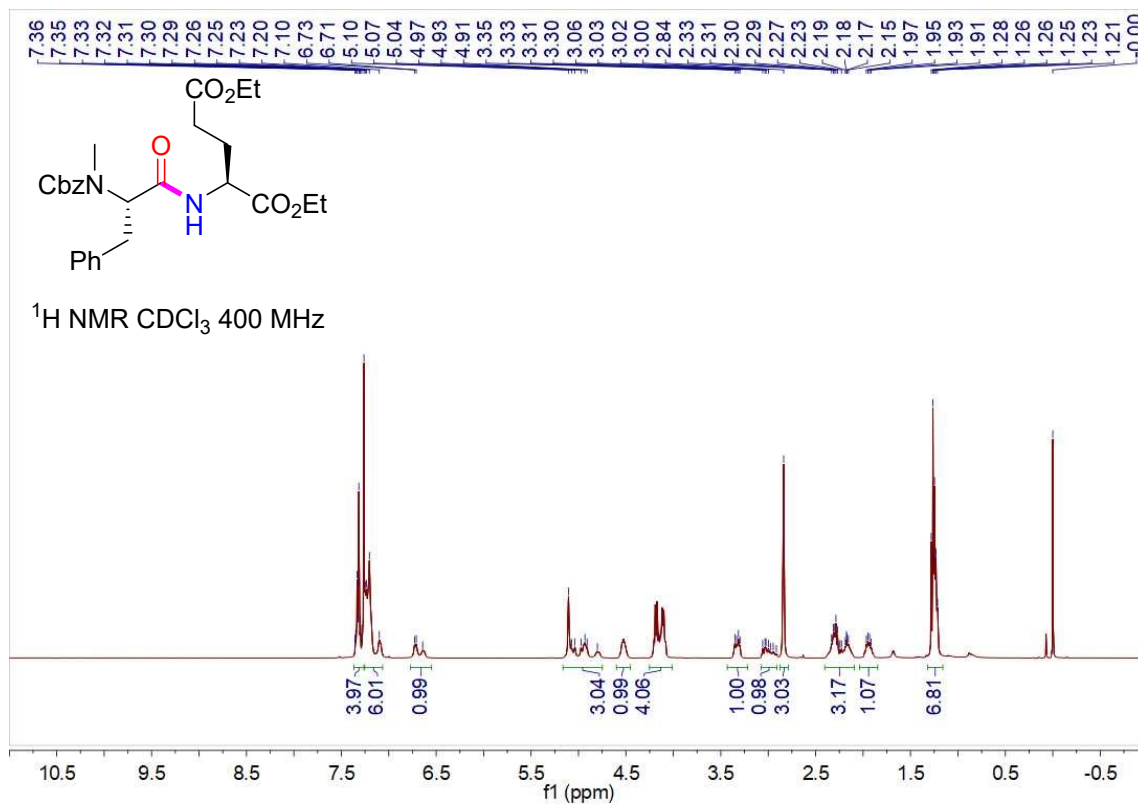

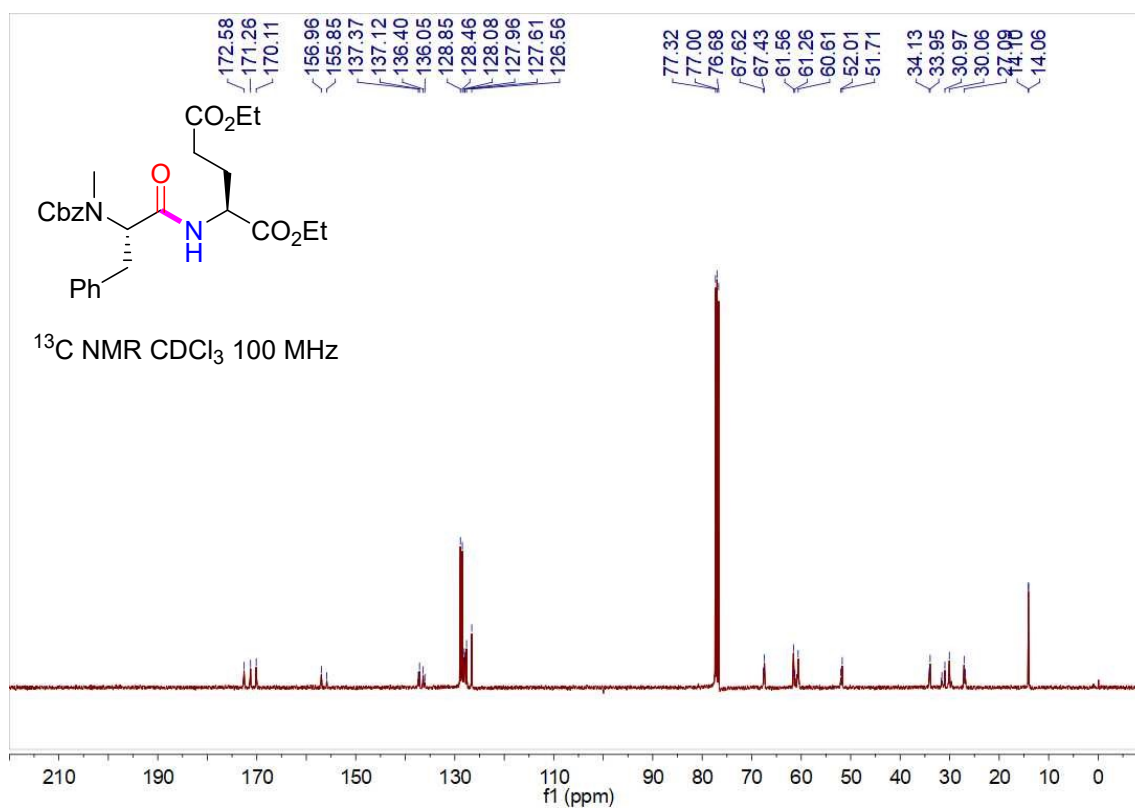

### Chromatogram

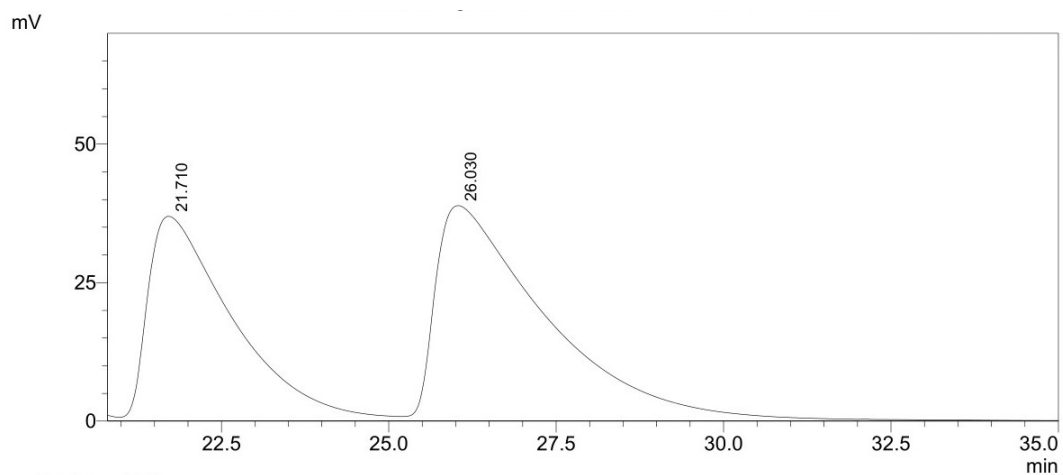

| Peak No | Ret. Time | Area    | Height | Area %  | Height% |
|---------|-----------|---------|--------|---------|---------|
| 1       | 21.710    | 3076443 | 36179  | 49.426  | 51.961  |
| 2       | 26.030    | 3147895 | 33448  | 50.574  | 48.039  |
| Total   |           | 6224338 | 69627  | 100.000 | 100.000 |



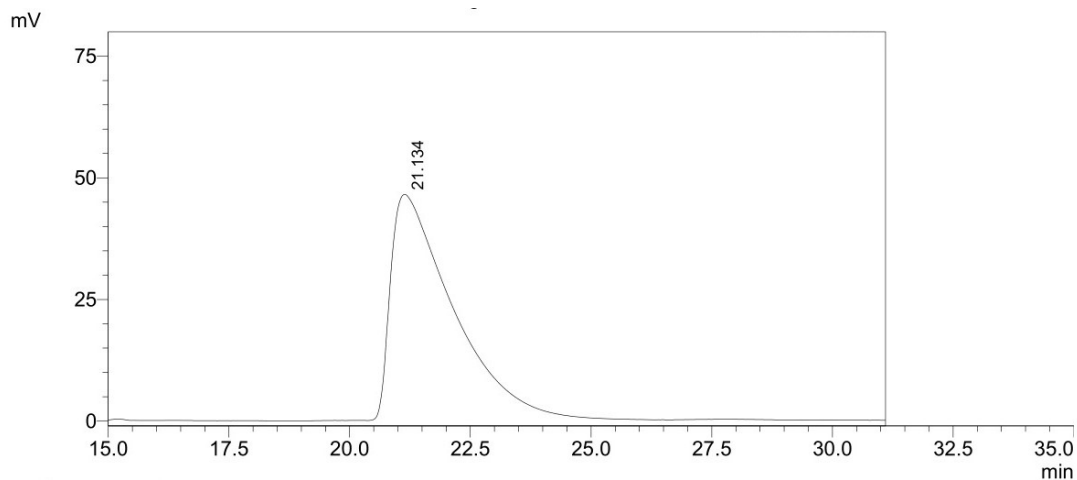

| Peak No | Ret. Time | Area    | Height | Area %  | Height% |
|---------|-----------|---------|--------|---------|---------|
| 1       | 21.134    | 3045906 | 39105  | 100.000 | 100.000 |
| Total   |           | 3045906 | 39105  | 100.000 | 100.000 |

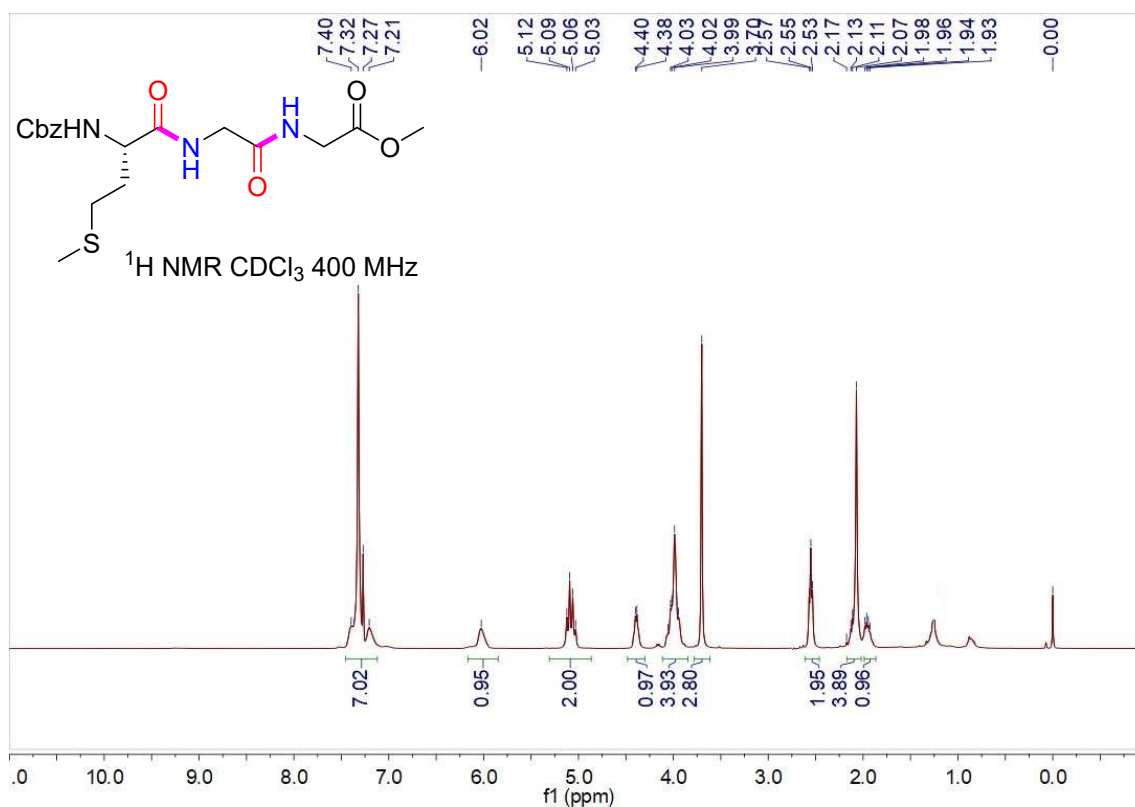

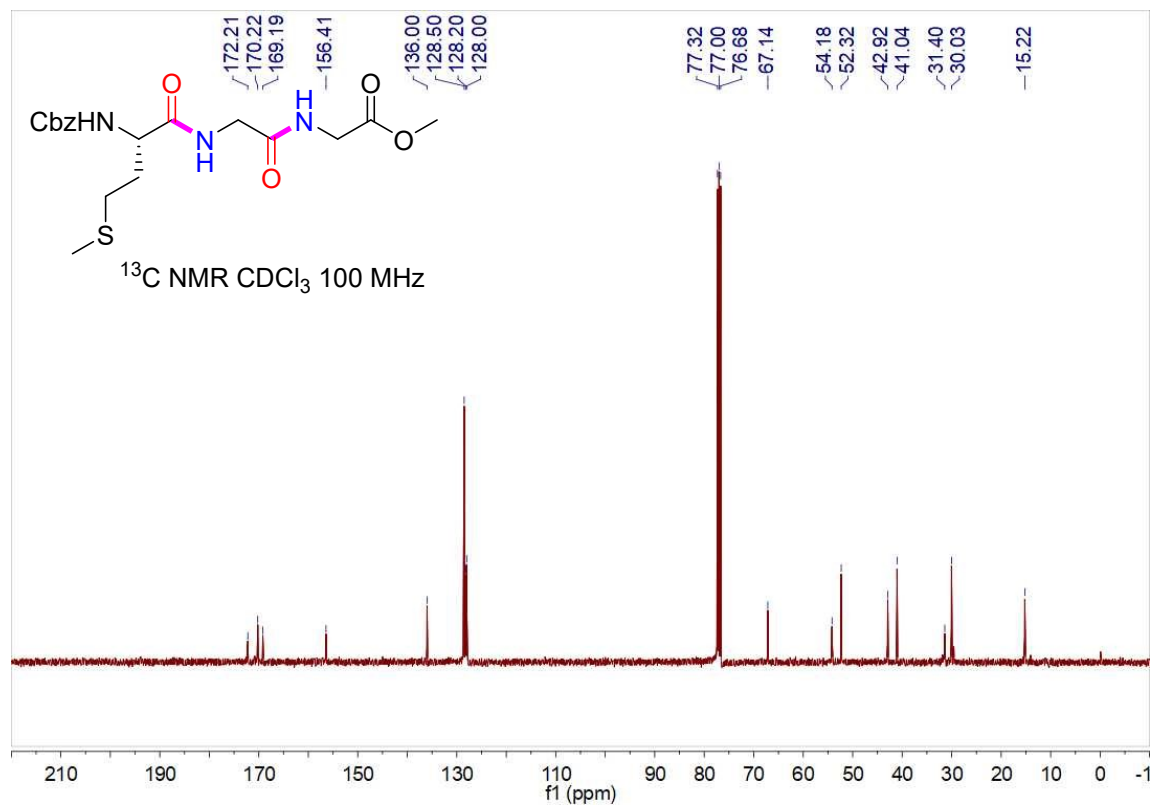

### Chromatogram

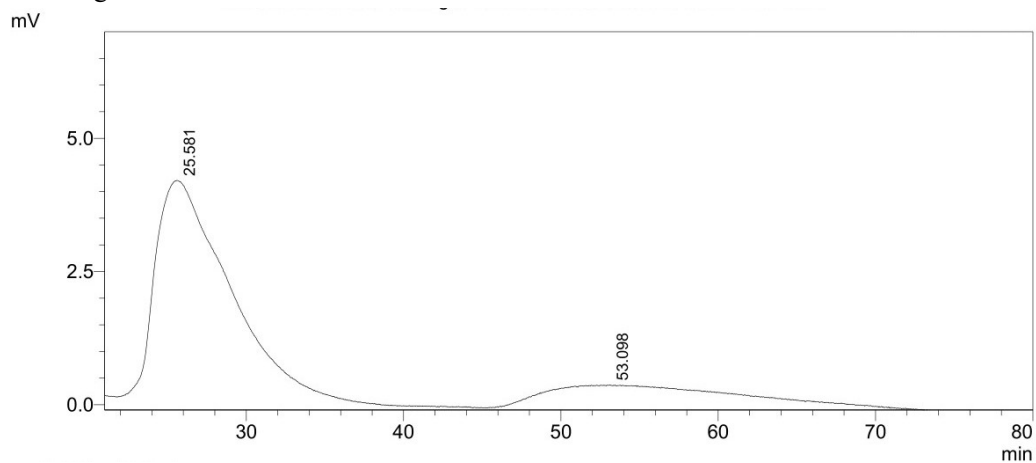

| Peak No | Ret. Time | Area   | Height | Area %  | Height% |
|---------|-----------|--------|--------|---------|---------|
| 1       | 25.581    | 473010 | 2569   | 49.945  | 84.758  |
| 2       | 53.098    | 474047 | 462    | 50.055  | 15.242  |
| Total   |           | 947057 | 3031   | 100.000 | 100.000 |

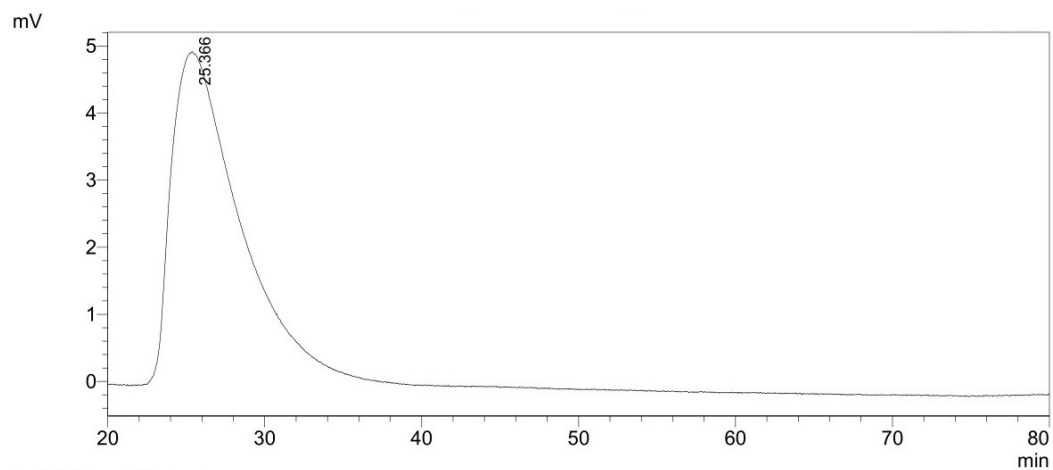

| Peak No | Ret. Time | Area    | Height | Area %  | Height% |
|---------|-----------|---------|--------|---------|---------|
| 1       | 25.366    | 1295749 | 4802   | 100.000 | 100.000 |
| Total   |           | 1295749 | 4802   | 100.000 | 100.000 |

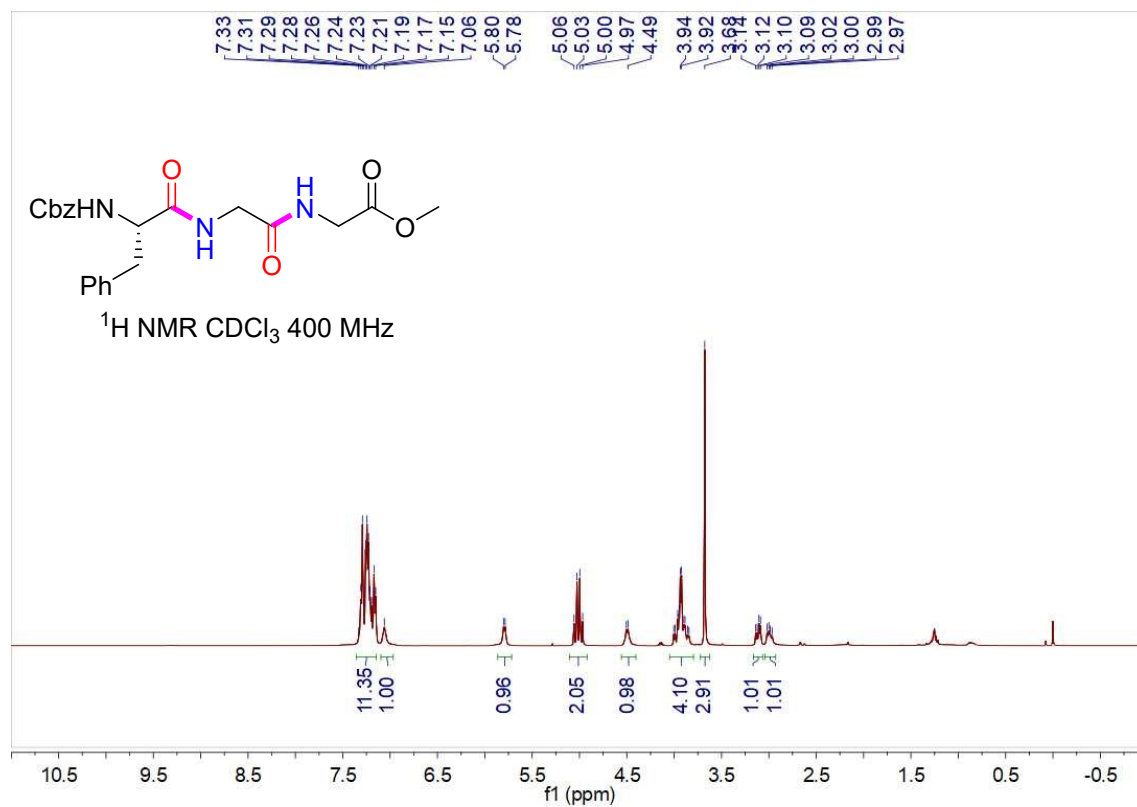

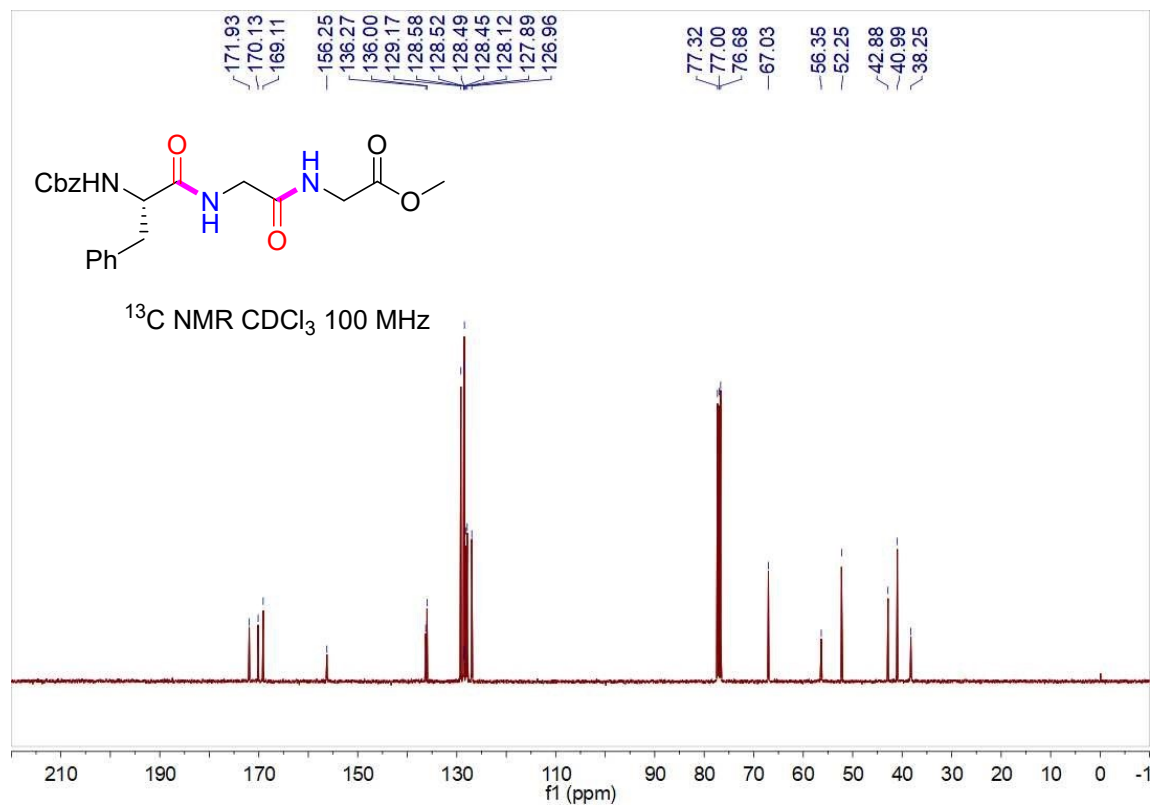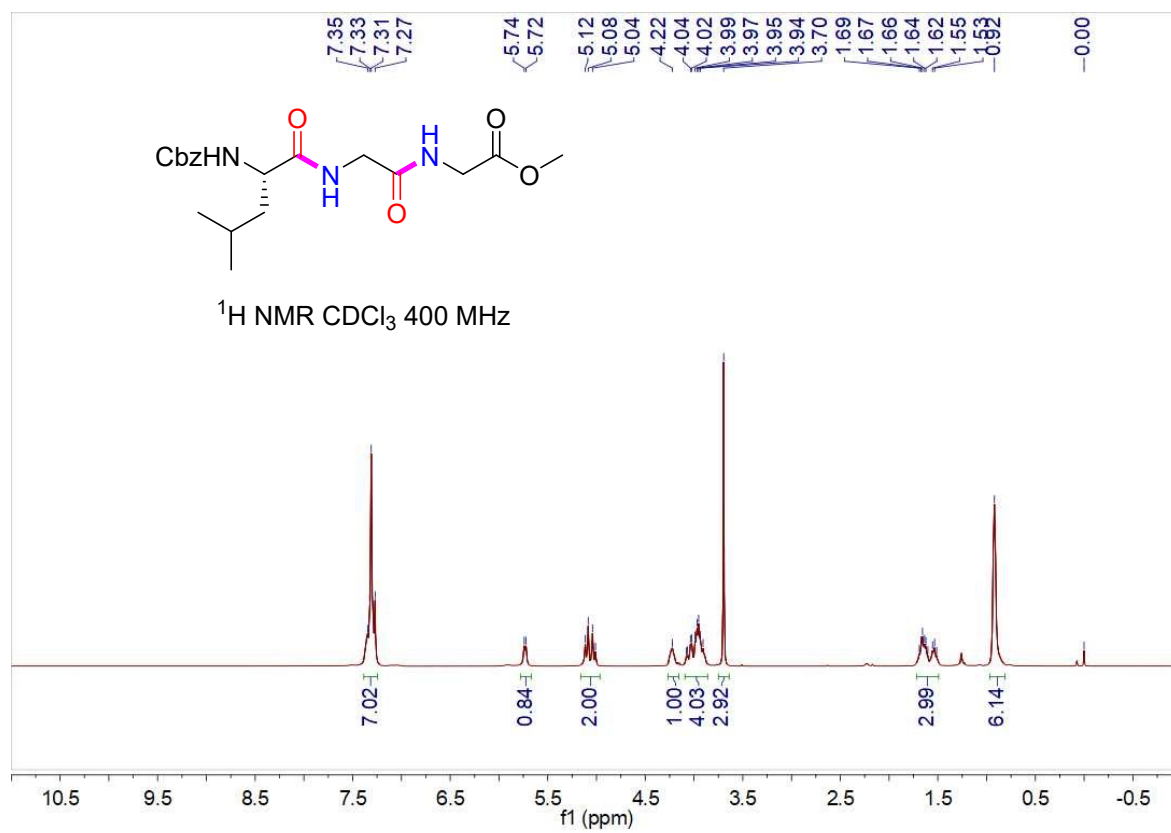

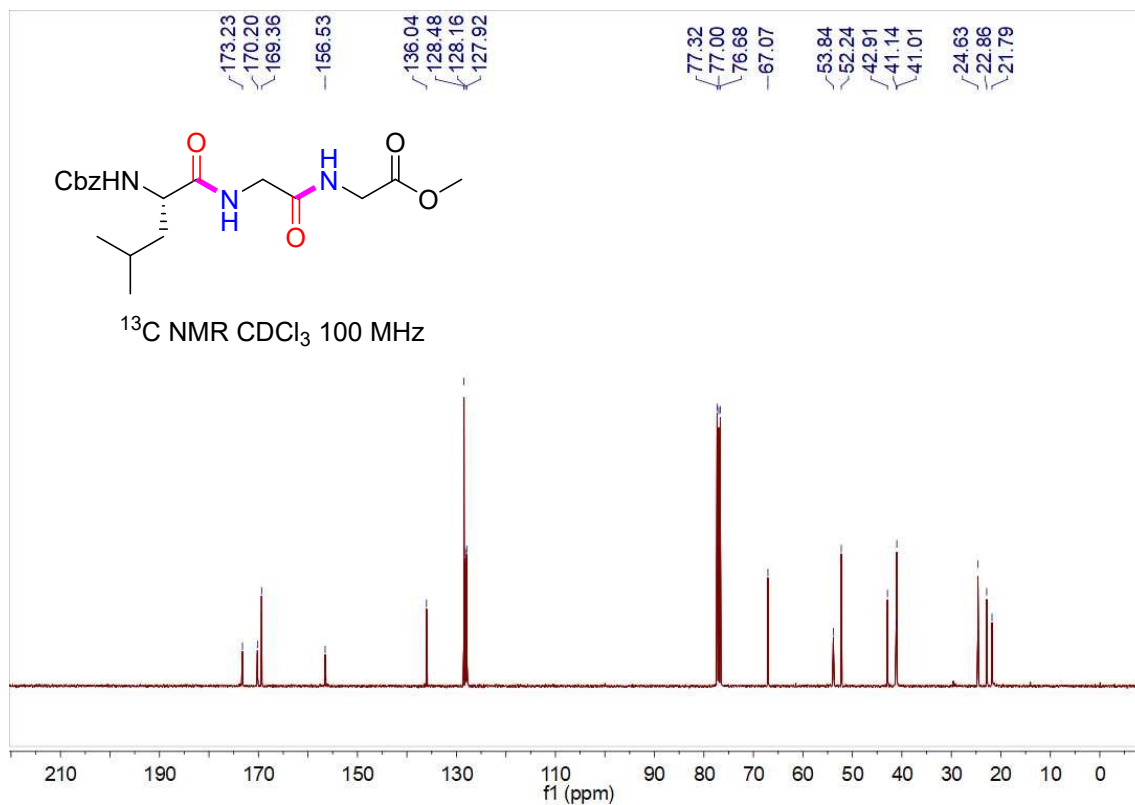

### Chromatogram

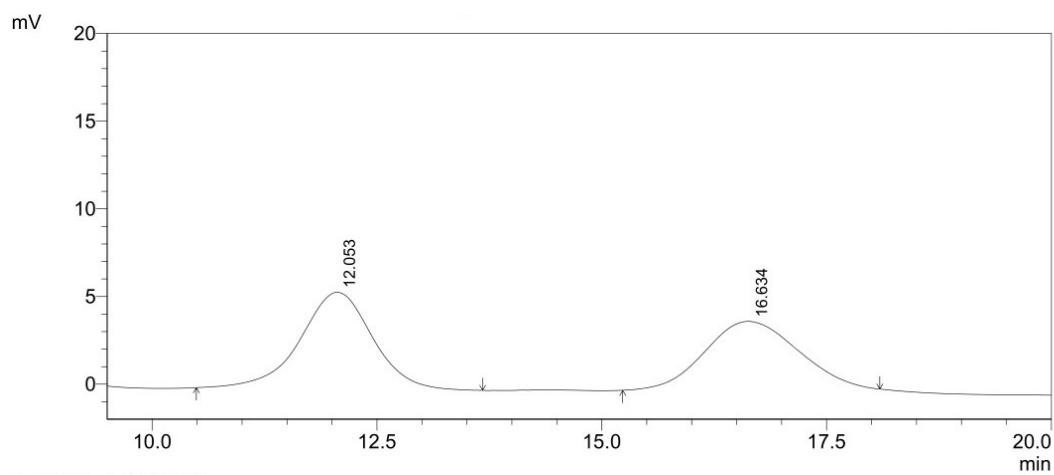

| Peak No | Ret. Time | Area   | Height | Area %  | Height% |
|---------|-----------|--------|--------|---------|---------|
| 1       | 12.053    | 309409 | 5516   | 52.298  | 58.571  |
| 2       | 16.634    | 282217 | 3901   | 47.702  | 41.429  |
| Total   |           | 591627 | 9417   | 100.000 | 100.000 |

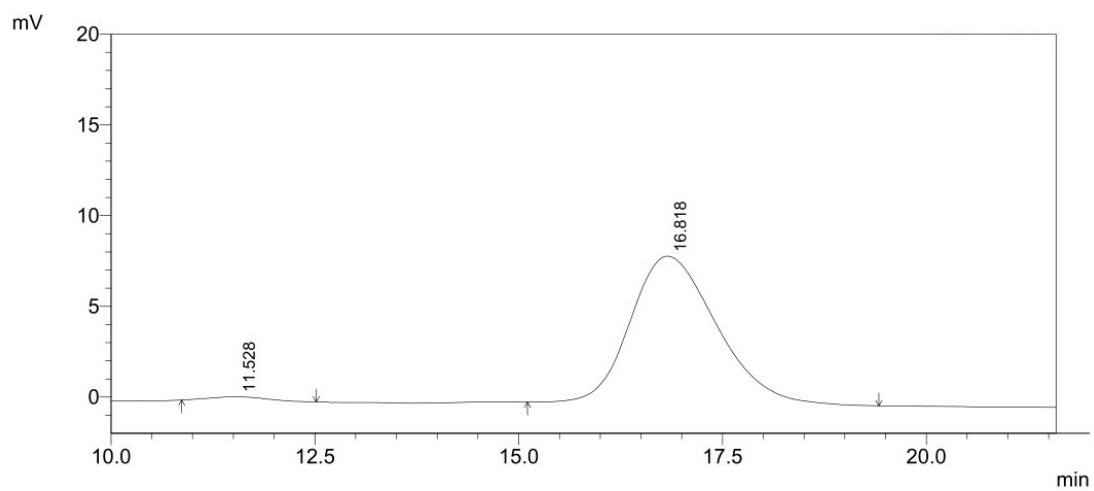

| Peak No | Ret. Time | Area   | Height | Area %  | Height% |
|---------|-----------|--------|--------|---------|---------|
| 1       | 11.528    | 10436  | 227    | 1.714   | 2.716   |
| 2       | 16.818    | 598374 | 8119   | 98.286  | 97.284  |
| Total   |           | 608810 | 8346   | 100.000 | 100.000 |

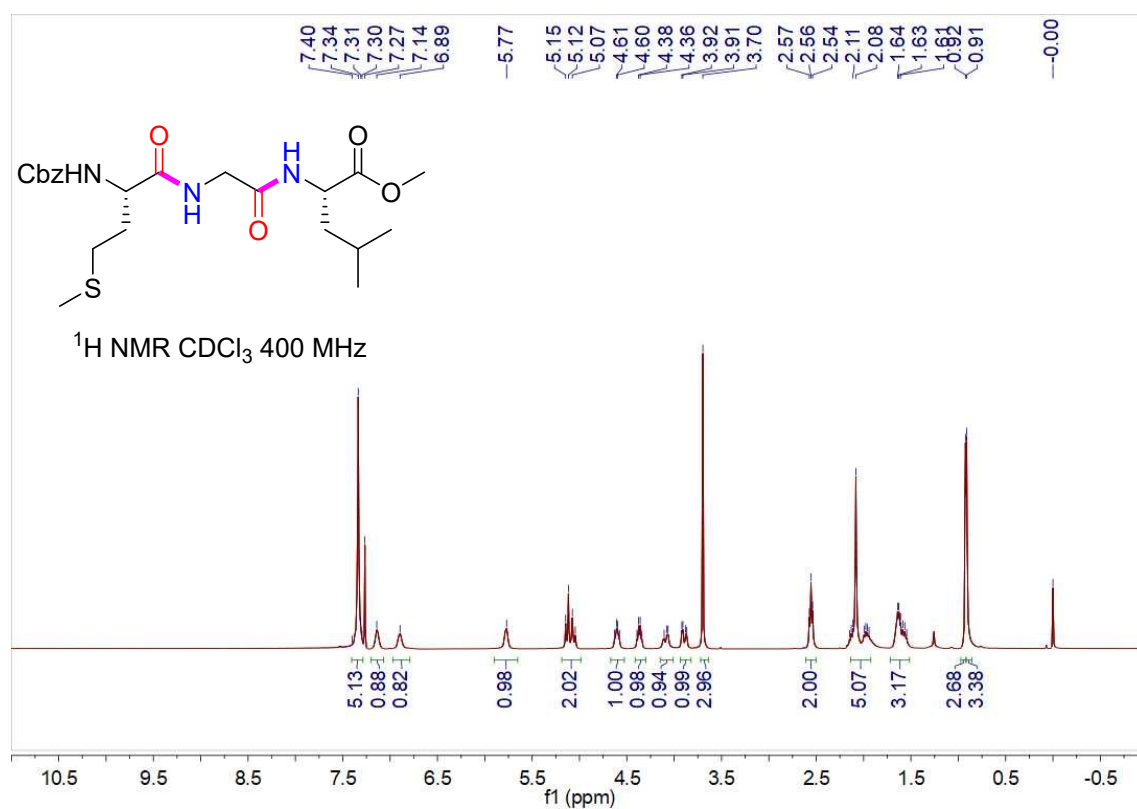

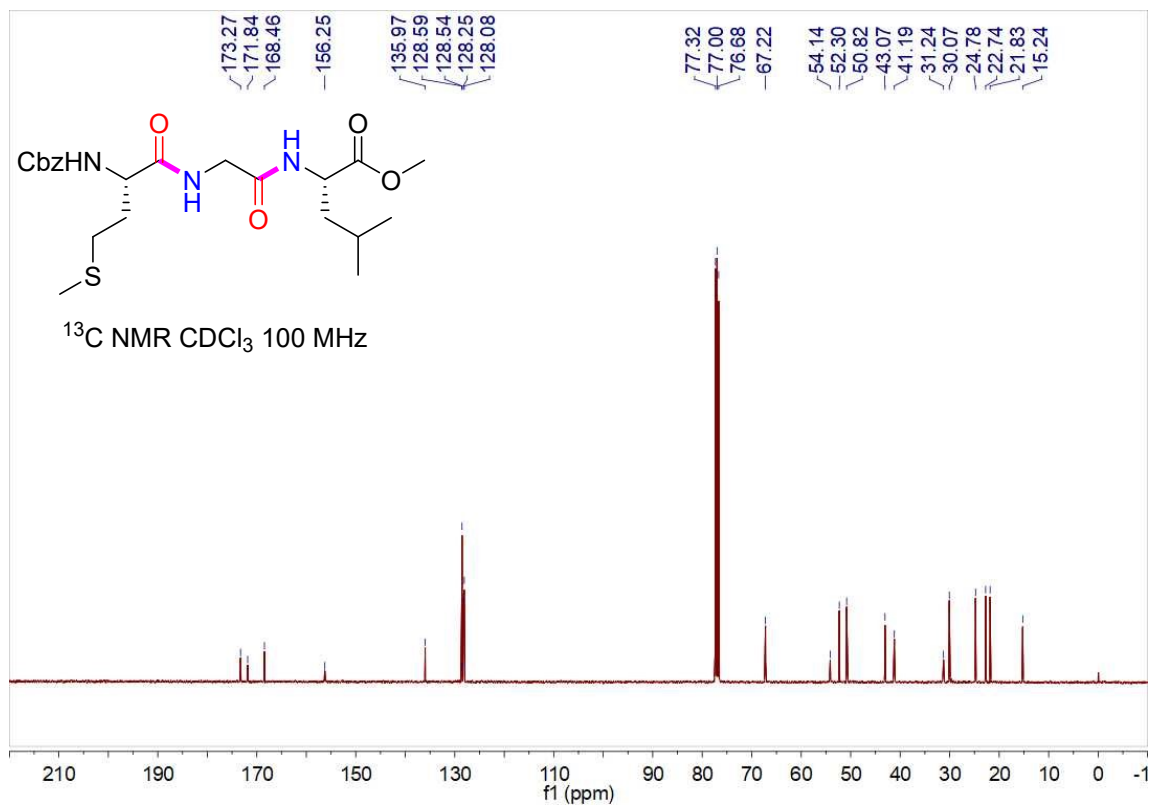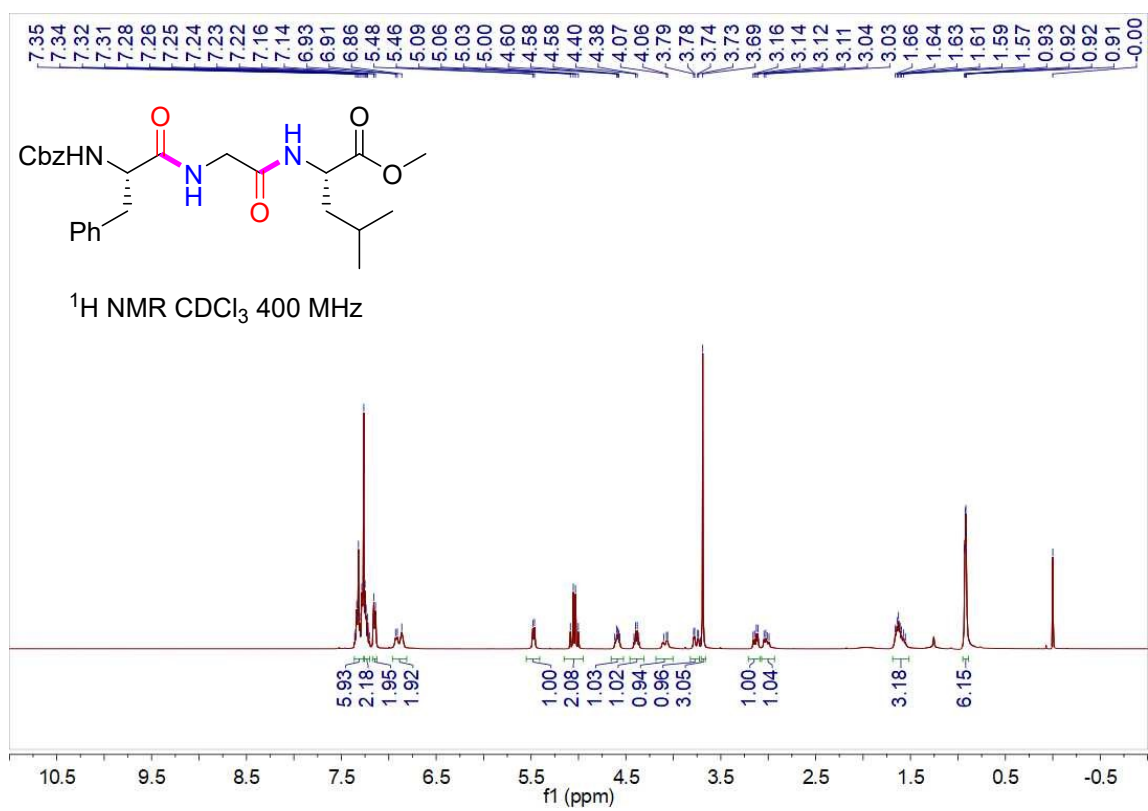

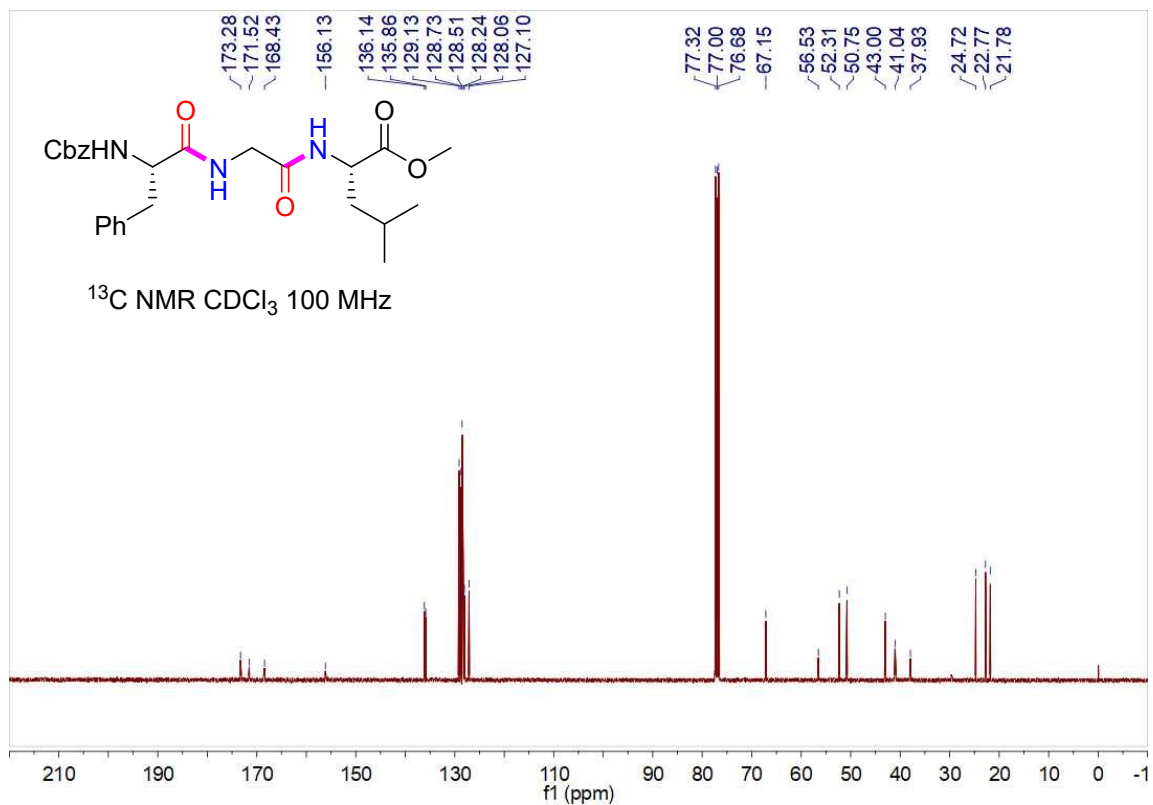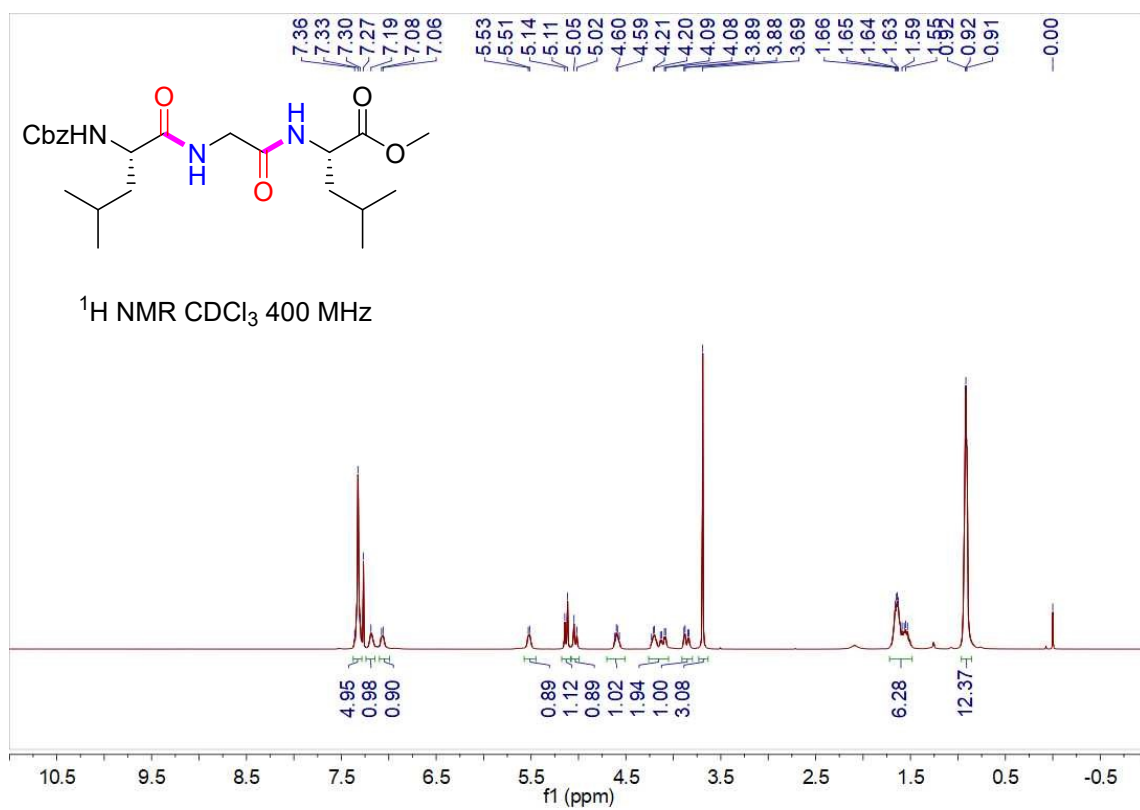



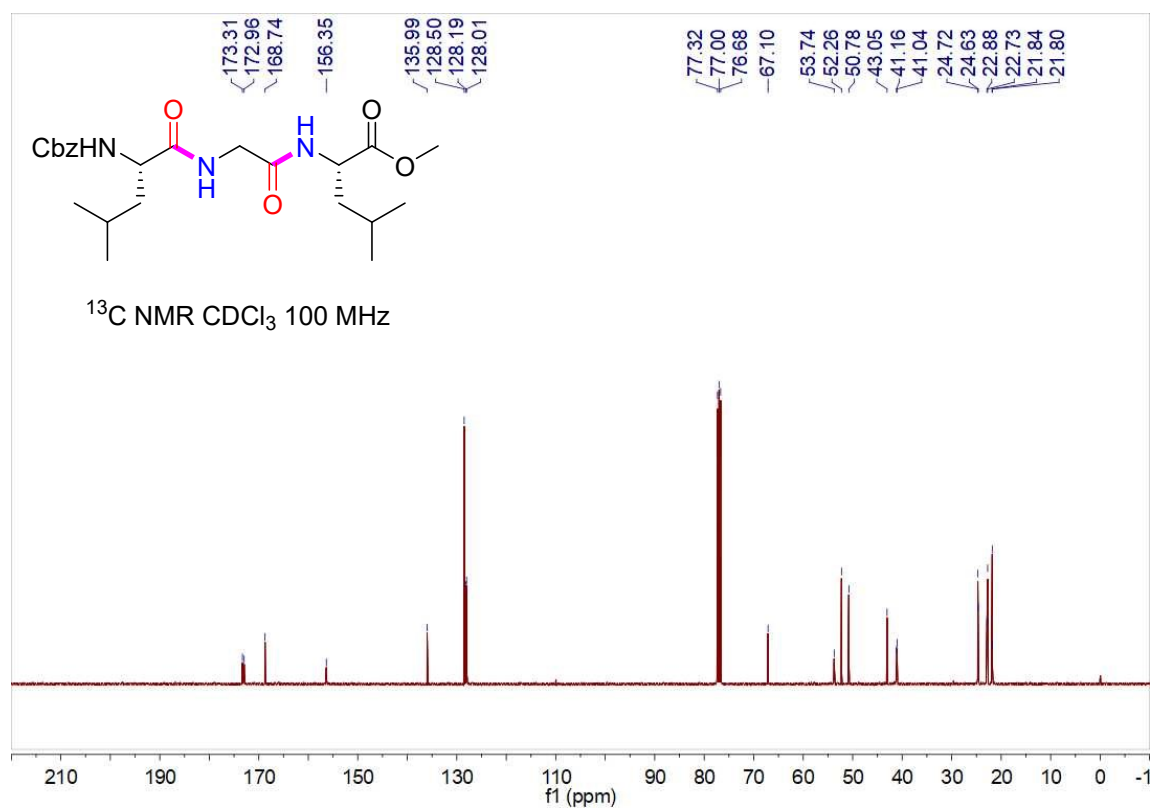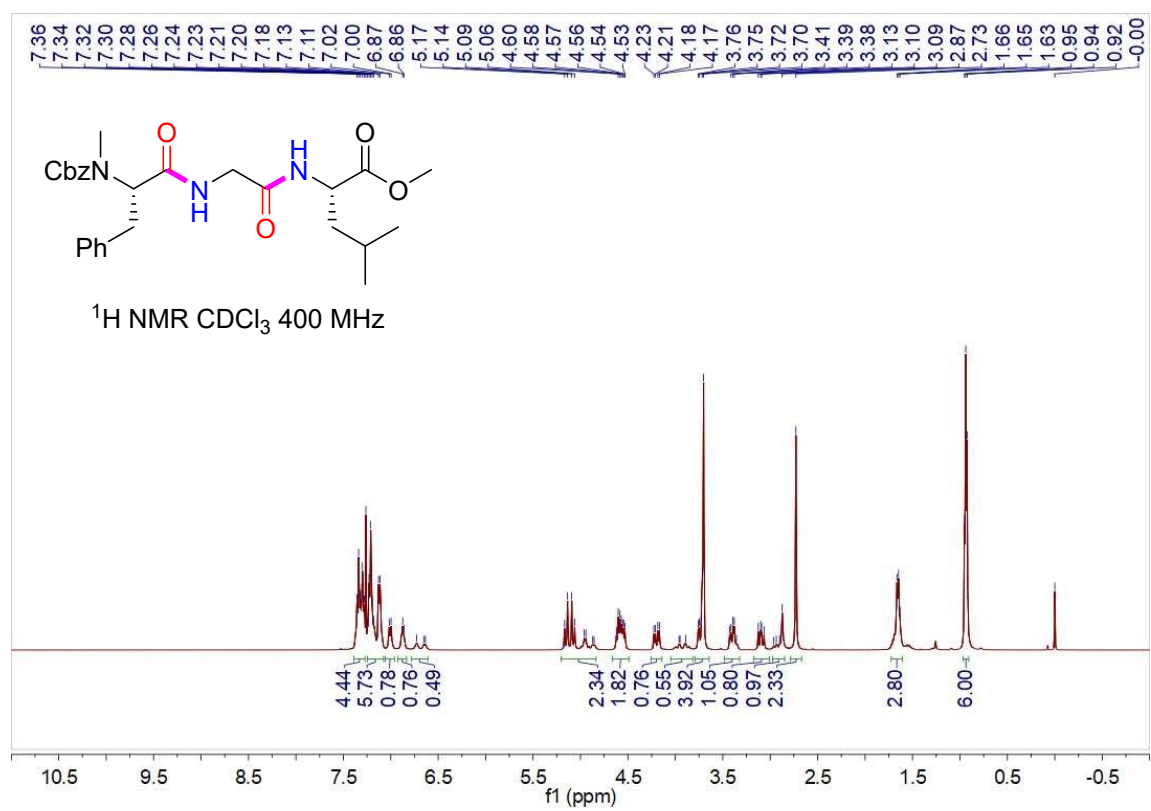

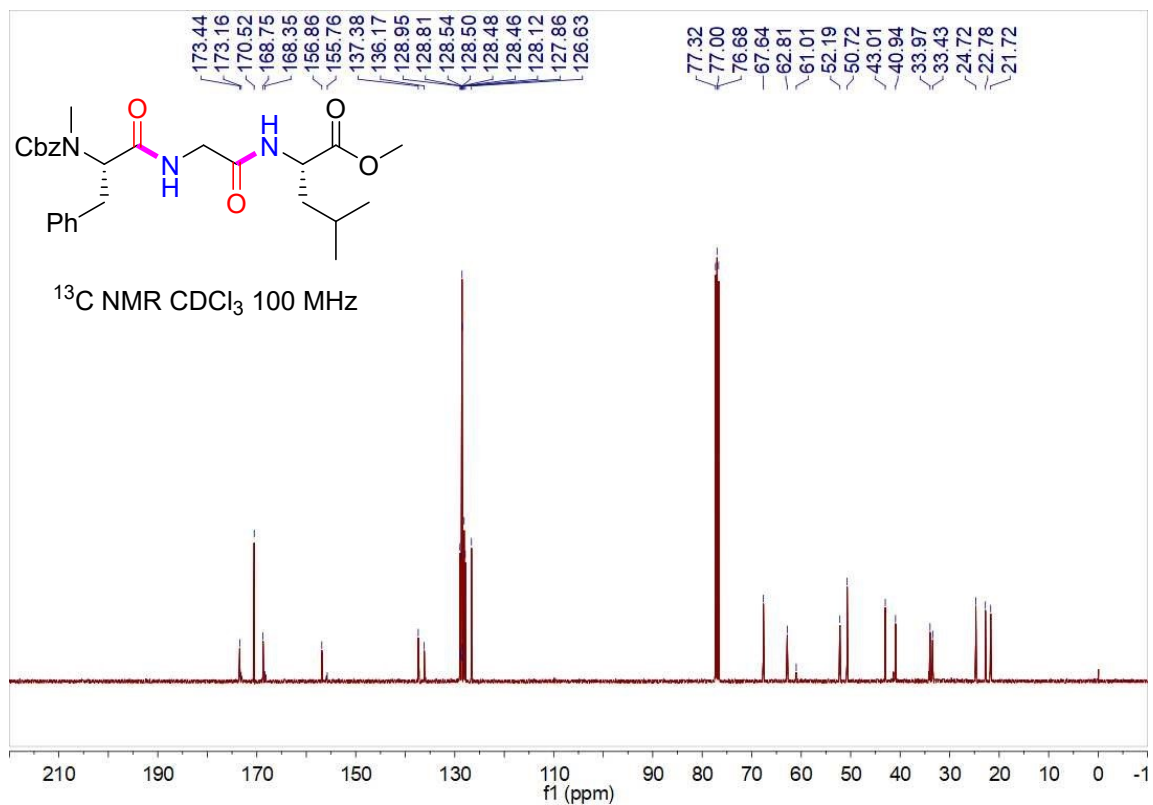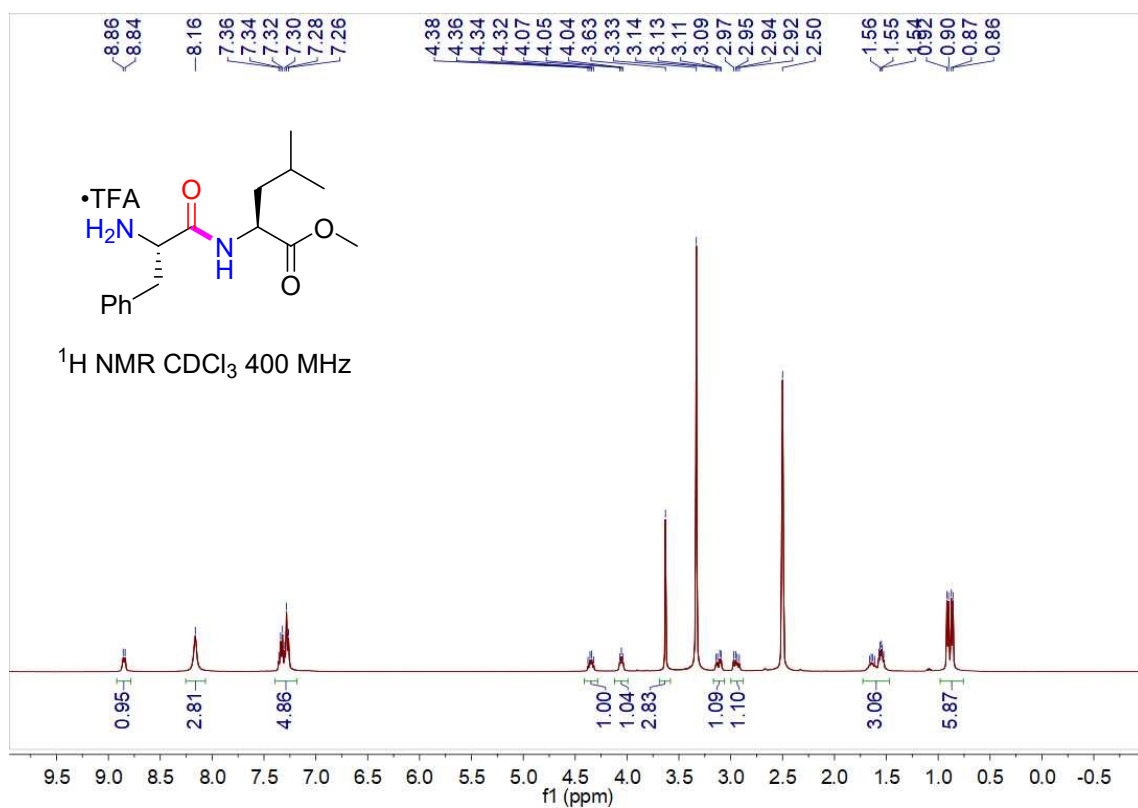

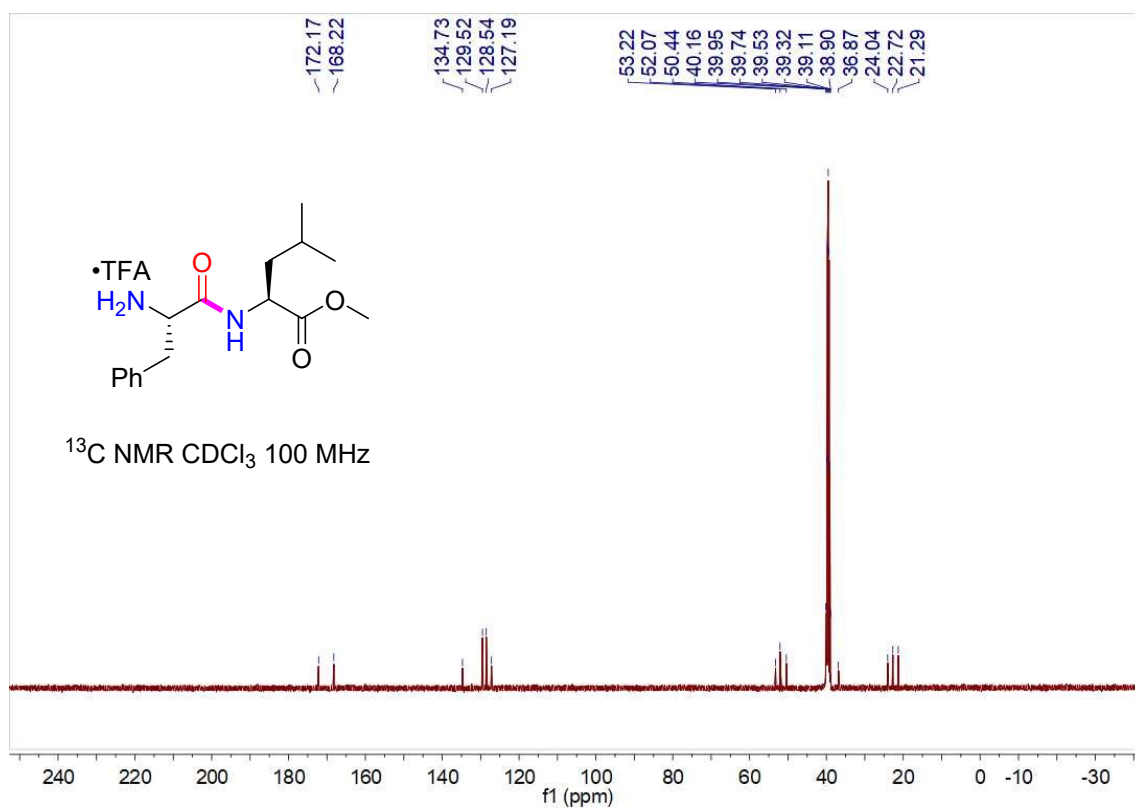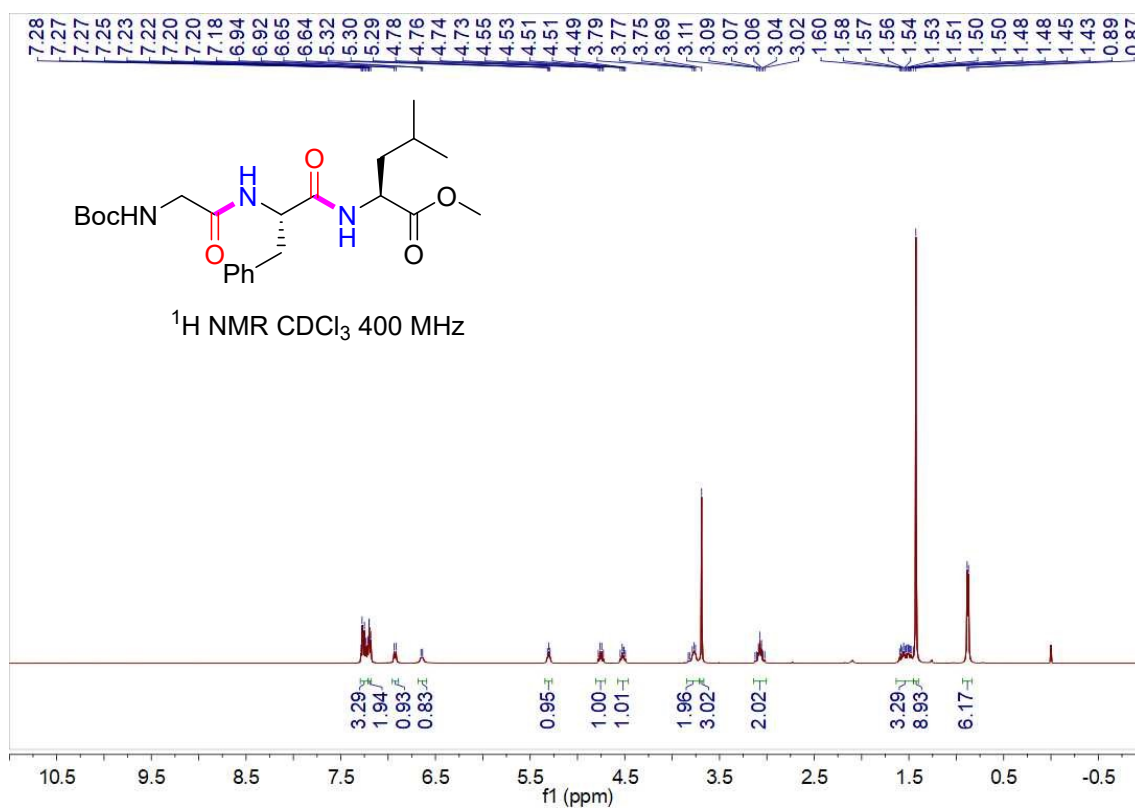

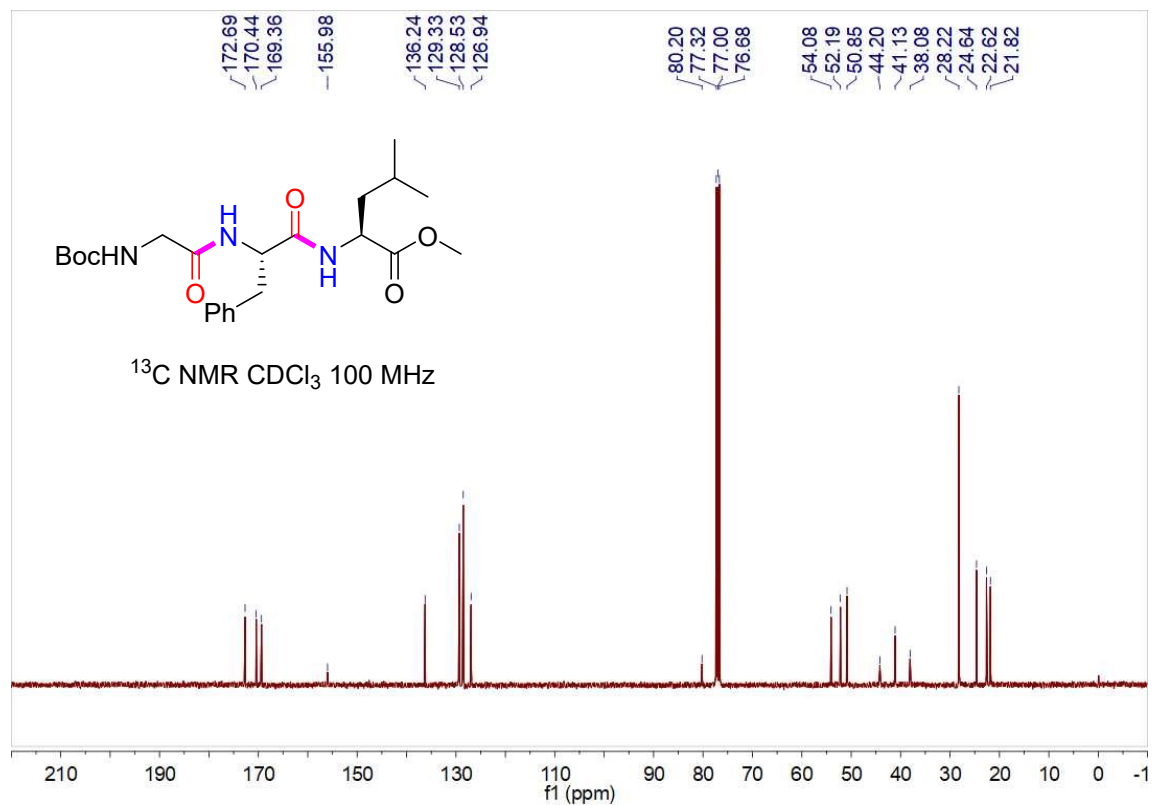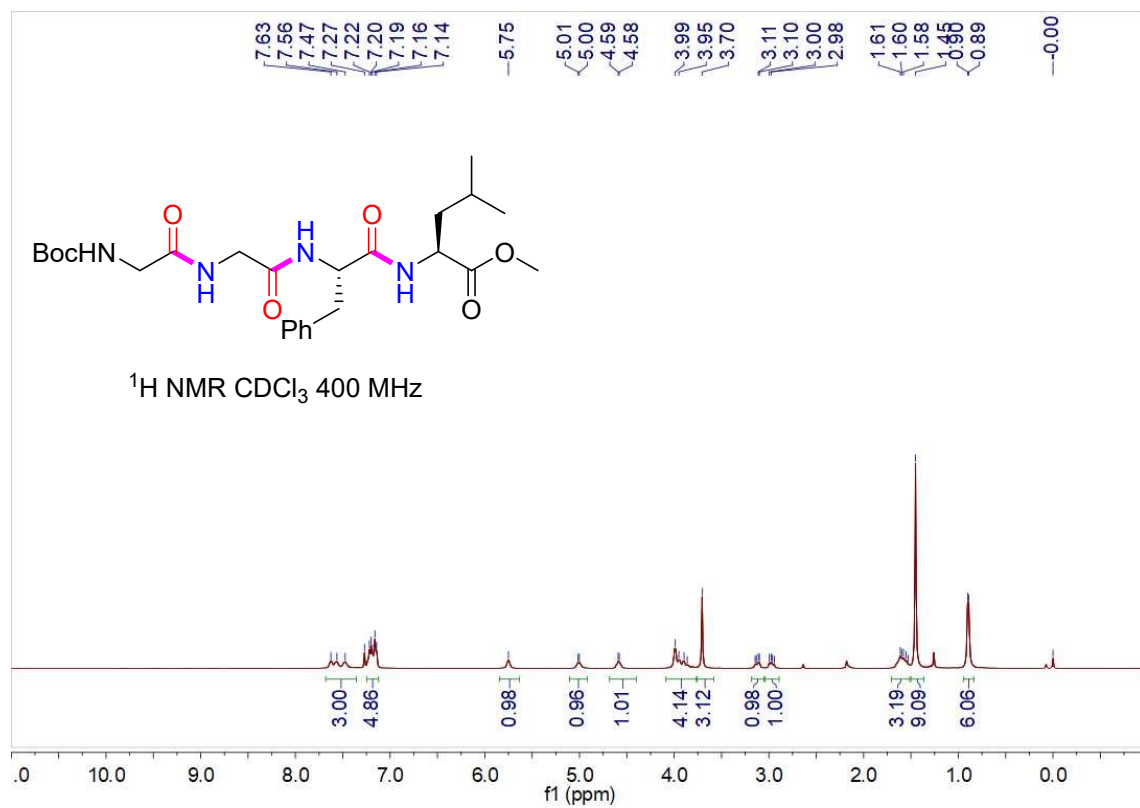

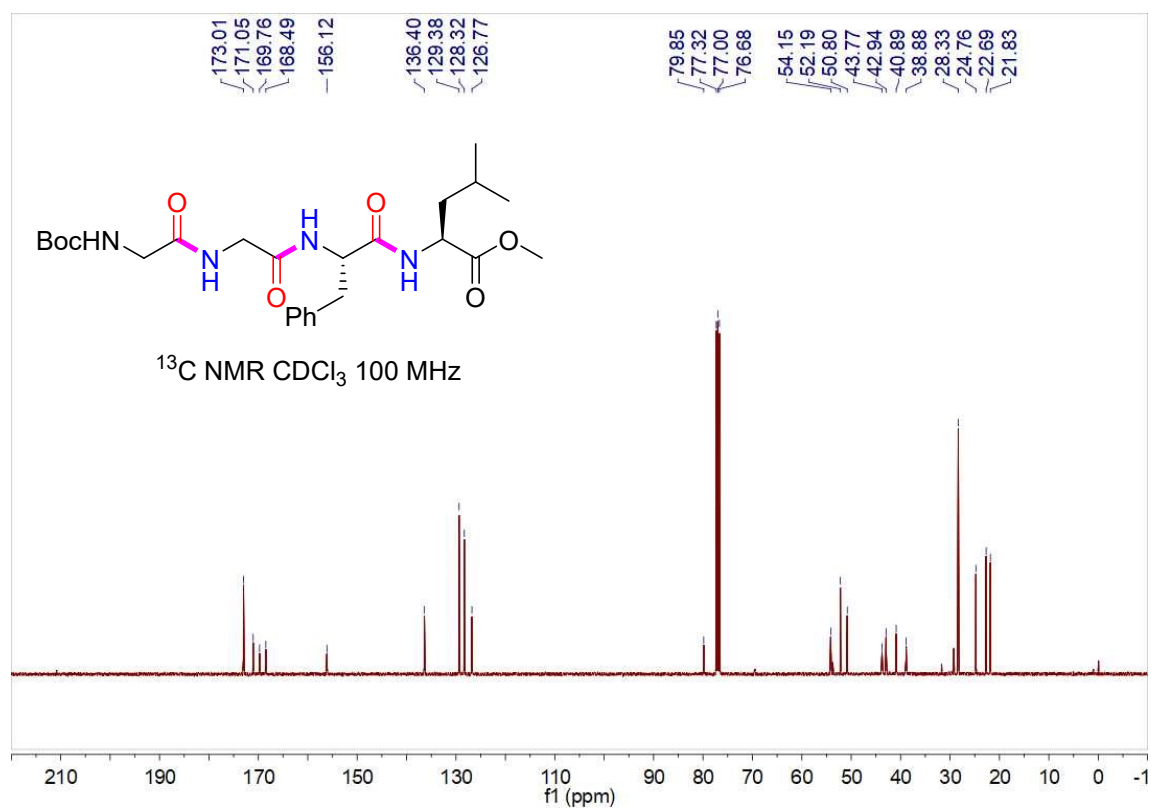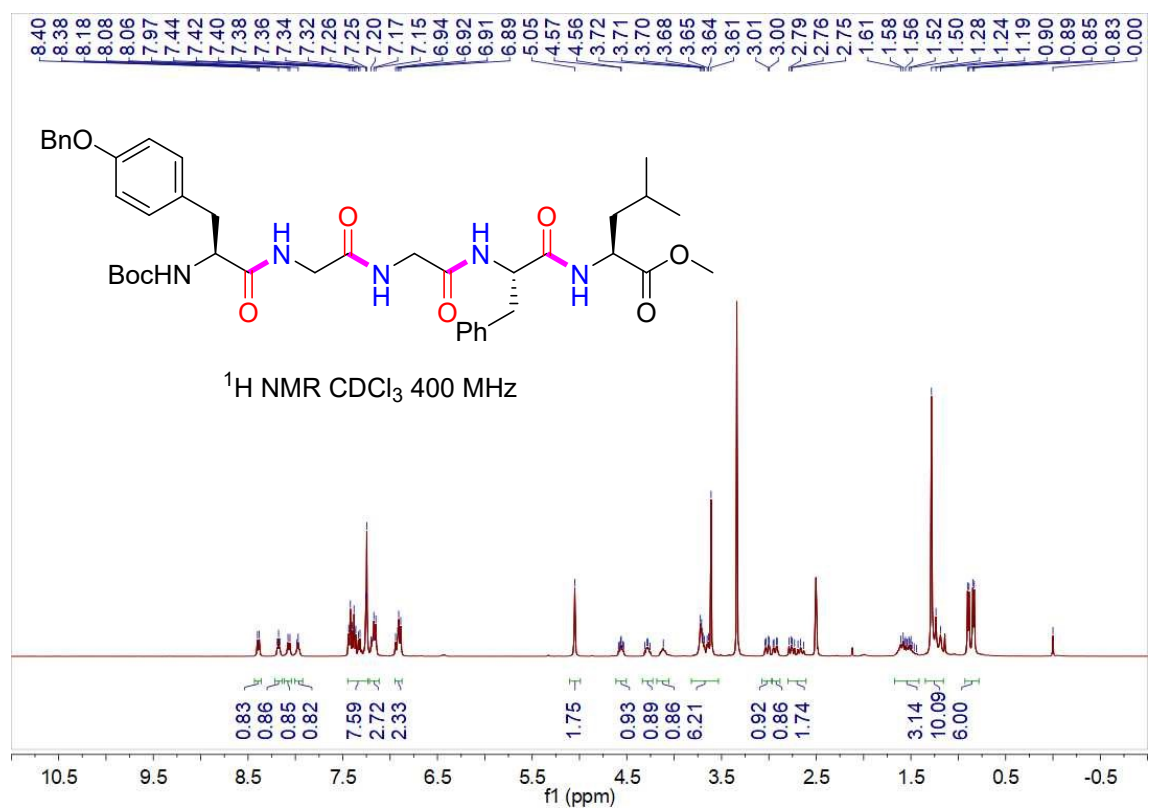

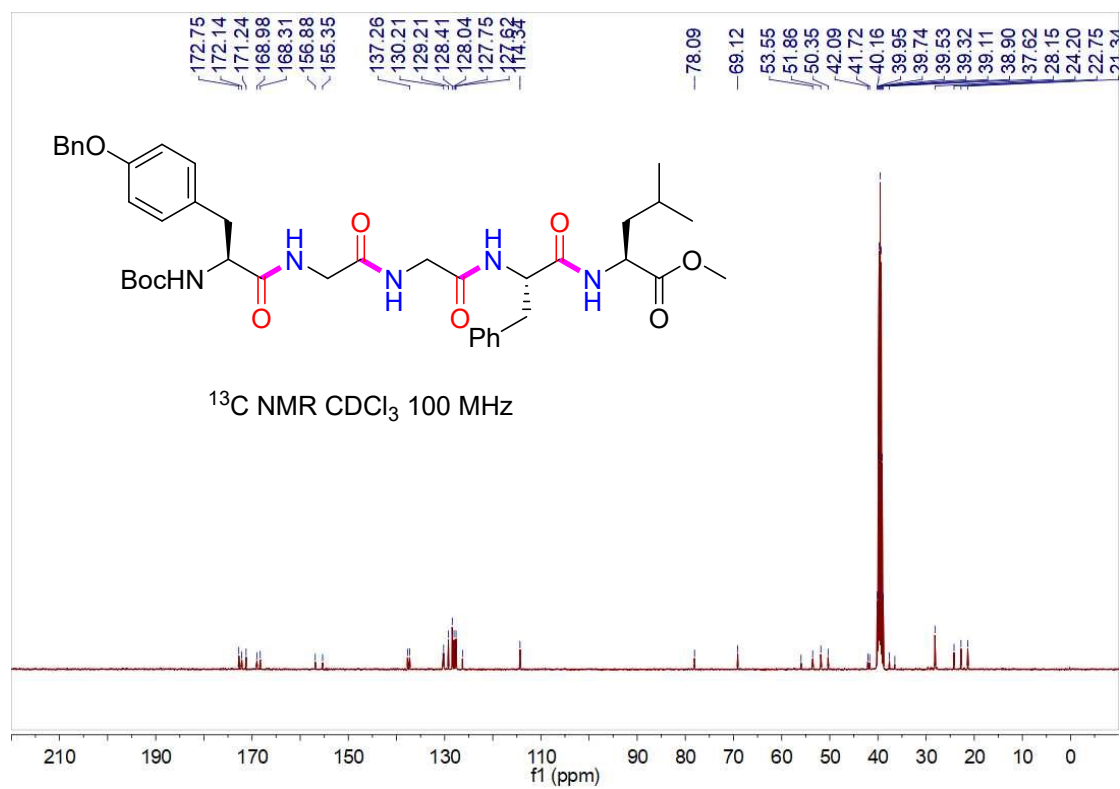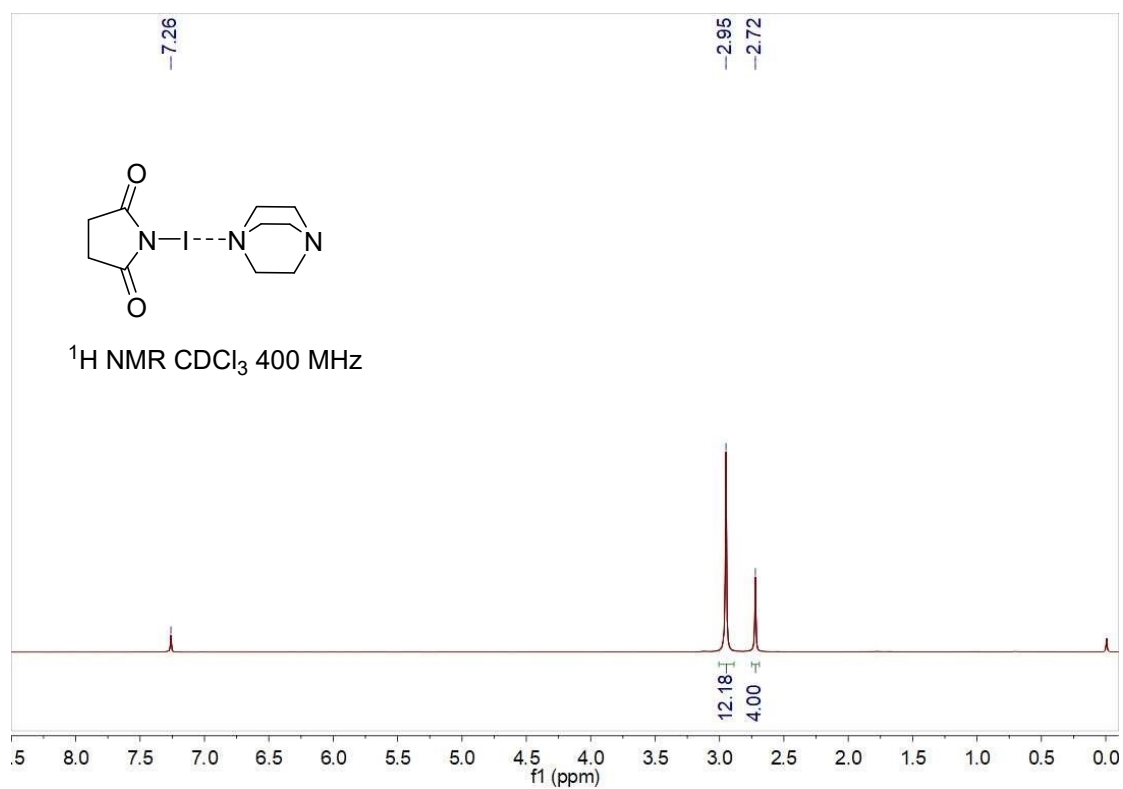

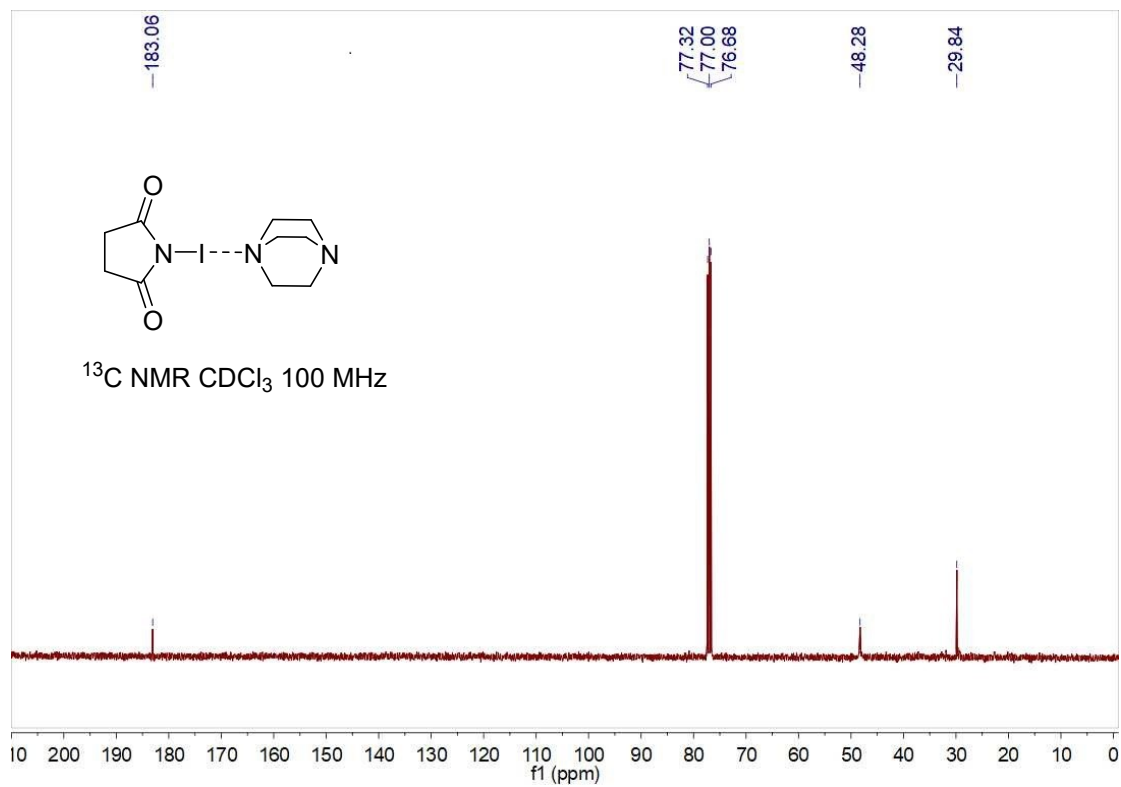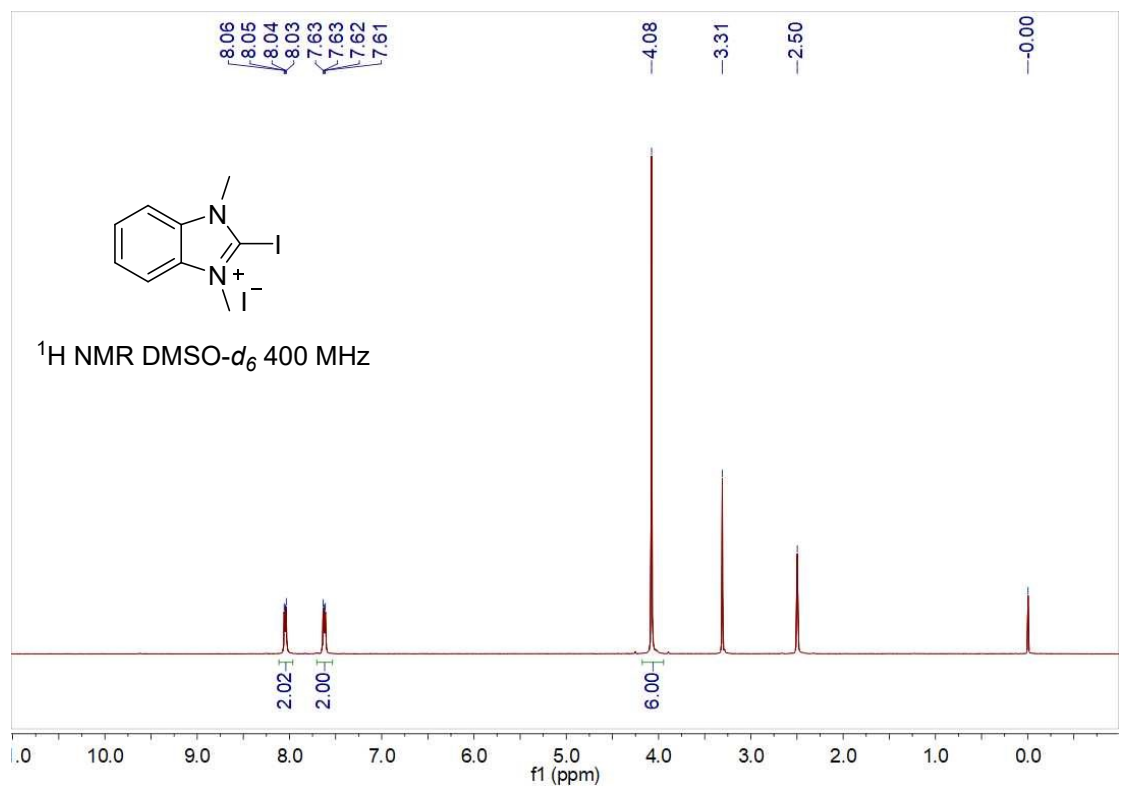

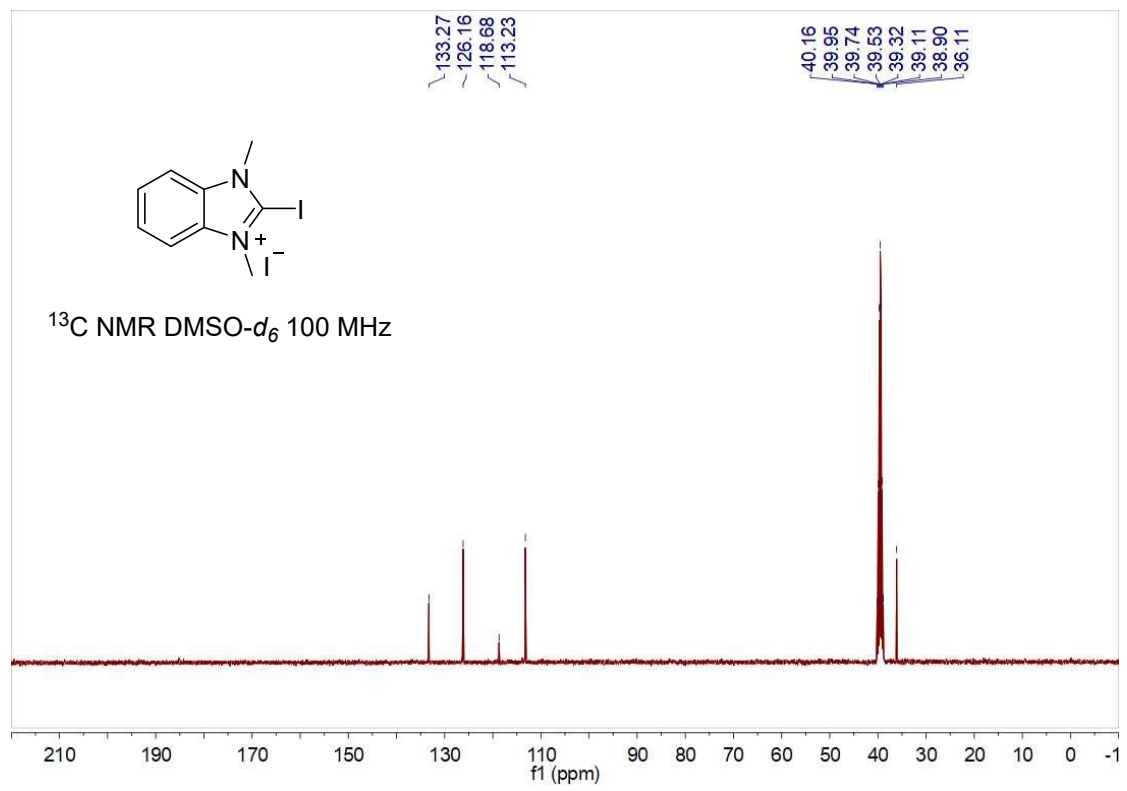



## 13 References

- [1] B. Bostai, Z. Novák, A. C. Bényei and A. Kotschy, *Org. Lett.*, **2007**, *9*, 3437–3439.
- [2] R. Rubbiani, I. Kitanovic, H. Alborzinia, S. Can, A. Kitanovic and L. A. Onambele, *J. Med. Chem.*, **2010**, *53*, 8608–8618.
- [3] C. H. Lim, S. Ilic, A. Alherz, B. T. Worrell, S. S. Bacon, J. T. Hynes, K. D. Glusac and C. B. Musgrave, *J. Am. Chem. Soc.*, **2019**, *141*, 272–280.
- [4] G. Wang, Z. Hu, Y. Zhang, W. Yao, L. Li, Z. Q. Fu and W. Huang, *Green Chem.*, **2018**, *20*, 3302–3307.
- [5] M. Rodríguez-Castillo, L. Laurencin, A. V. der Lee, S. Clément, Y. Guari and S. Richeter, *Dalton Trans.*, **2014**, *43*, 5978–5982.
- [6] W. C. Chen, Y. C. Lai, W. C. Shih, M. S. Yu, G. P. A. Yap and T. G. Ong, *Chem. Eur. J.*, **2014**, *20*, 8099–8105.
- [7] M. C. D'Amaral, N. Jamkhou and M. J. Adler, *Green Chem.*, **2011**, *23*, 288–295.
- [8] R. Zhang, W. Z. Yao, L. Qian, W. Sang, Y. Yuan, M. C. Du, H. Cheng, C. Chen and X. A. Qin, *Green Chem.*, **2021**, *23*, 3972–3982.
- [9] H. Yang, W. Hu, S. Deng, T. Wu, H. Cen, Y. Chen, D. Zhang and B. Wang, *New J. Chem.*, **2015**, *39*, 5912–5915.
- [10] V. Kumar, S. J. Connon and Direct, *Chem. Commun.*, **2017**, *53*, 1021210215.
- [11] J. W. Bode and S. S. Sohn, *J. Am. Chem. Soc.*, **2007**, *129*, 13798–13799.
- [12] M. Gonay, C. Batisse and J. F. Paquin, *J. Org. Chem.*, **2020**, *85*, 10253–10260.
- [13] J. Tian, W. C. Gao, D. M. Zhou and C. Zhang, *Org. Lett.*, **2012**, *14*, 3020–2023.
- [14] C. Zhang, S. S. Liu, B. Sun and J. Tian, *Org. Lett.*, **2015**, *17*, 4106–4109.
- [15] W. X. Gu and R. B. Silverman, *Org. Lett.*, **2003**, *5*, 415–418.
- [16] K. Yamada, M. Kota, K. Takahashi, H. Fujita, M. Kitamura and M. Kunishima, *J. Org. Chem.*, **2019**, *84*, 15042–15051.
- [17] P. J. Chen, H. Y. Wang and A. Y. Peng, *RSC Adv.*, **2015**, *5*, 94328–94331.
- [18] L. J. Qiu, D. Liu, K. Zheng, M. T. Zhang and C. A. Zhang, *Front. Chem.*, **2020**, *8*, 183.
- [19] T. Dalidovich, K. A. ishra, T. Shalima, M. Kudrjašova, D. G. Kananovich and R. Aav, *ACS Sustainable Chem. Eng.*, **2020**, *8*, 15703–15715.
- [20] A. K. Mishra, G. Parvari, S. K. Santra, A. Bazylevich, O. Dorfman, J. Rahamim, Y. Eichen and A. M. Szpilman, *Angew. Chem. Int. Ed.*, **2021**, *60*, 12406–12412.
- [21] M. J. Frisch, G. W. Trucks, H. B. Schlegel, G. E. Scuseria, M. A. Robb, J. R. Cheeseman, G. Scalmani, V. Barone, B. Mennucci, G. A. Petersson, H. Nakatsuji, M. Caricato, X. Li, H. P. Hratchian, A. F. Izmaylov, J. Bloino, G. Zheng, J. L. Sonnenberg, M. Hada, M. Ehara, K. Toyota, R. Fukuda, J. Hasegawa, M. Ishida, T. Nakajima, Y. Honda, O. Kitao, H. Nakai, T. Vreven, J. A. Montgomery, Jr., J. E. Peralta, F. Ogliaro, M. Bearpark, J. J. Heyd, E. Brothers, K. N. Kudin, V. N. Staroverov, R. Kobayashi, J. Normand, K. Raghavachari, A. Rendell, J. C. Burant, S. S. Iyengar, J. Tomasi, M. Cossi, N. Rega, J. M. Millam, M. Klene, J. E. Knox, J. B. Cross, V. Bakken, C. Adamo, J. Jaramillo, R. Gomperts, R. E. Stratmann, O. Yazyev, A. J. Austin, R. Cammi, C. Pomelli, J. W. Ochterski, R. L. Martin, K. Morokuma, V. G. Zakrzewski, G. A. Voth, P. Salvador, J. J. Dannenberg, S. Dapprich, A. D. Daniels, O. Farkas, J. B. Foresman, J. V. Ortiz, J. Cioslowski, D. J. Fox, Gaussian 09, Revision D.01, Gaussian, Inc. Wallingford CT, **2013**.

[22] E. Engelage, N. Schulz, F. Heinen, S. M. Huber, D. G. Truhlar and C. J. Cramer, *Chem. Eur. J.*, **2018**, *24*, 15983–15987.

[23] Legault, C. Y. CYLview, 1.0b; Université de Sherbrooke: Quebec, Canada, **2009**; <http://www.cylview.org>.
